# Supplementary material
Source: PubMed Central journal article supplement (PMC6802276)
Supplement: NIHMS1530254-supplement-Sup_dataset_1-4.pdf [file NIHMS1530254-supplement-Sup_dataset_1-4.pdf]

**György B et al. Allele-specific gene editing prevents deafness in a model of dominant progressive hearing loss**

**Supplementary Data Set Files**

**Supplementary Data Set 1.** TIDE analysis of all Sanger sequencing samples from Extended Data Fig. 1. SpCas9 only (GFP) was used as a control for analysis (pages 1-96).

**Supplementary Data Set 2.** CRISPResso analysis on all samples from Extended Data Fig. 1e. In the case of *Tmc1Bth/WT* samples, reads were segregated to Bth and WT before CRISPResso analysis (pages 97-111).

**Supplementary Data Set 3.** CRISPResso analysis on all samples from Fig. 1b. In the case of *Tmc1Bth/WT* samples, reads were segregated to Bth and WT before CRISPResso analysis (pages 112-141).

**Supplementary Data Set 4.** Sequencing result from pBG201 empty vector (pAAVCMV-NLS(SV40)-SaCas9(E782K/N968K/R1015H)-NLS(nucleoplasmin)-3xHA-bGHpA0-U6-BsaI-sgRNA). Plasmid DNA was sequenced by next-generation sequencing using the Plasmid Sequencing Service of the MGH DNA Core (Cambridge, MA, USA) (pages 142-144).

sample: WT/WT cell line, WT gRNA, reverse  
guide: GGGTGGGACAGAACATCCCC

total eff. = 56.4 %

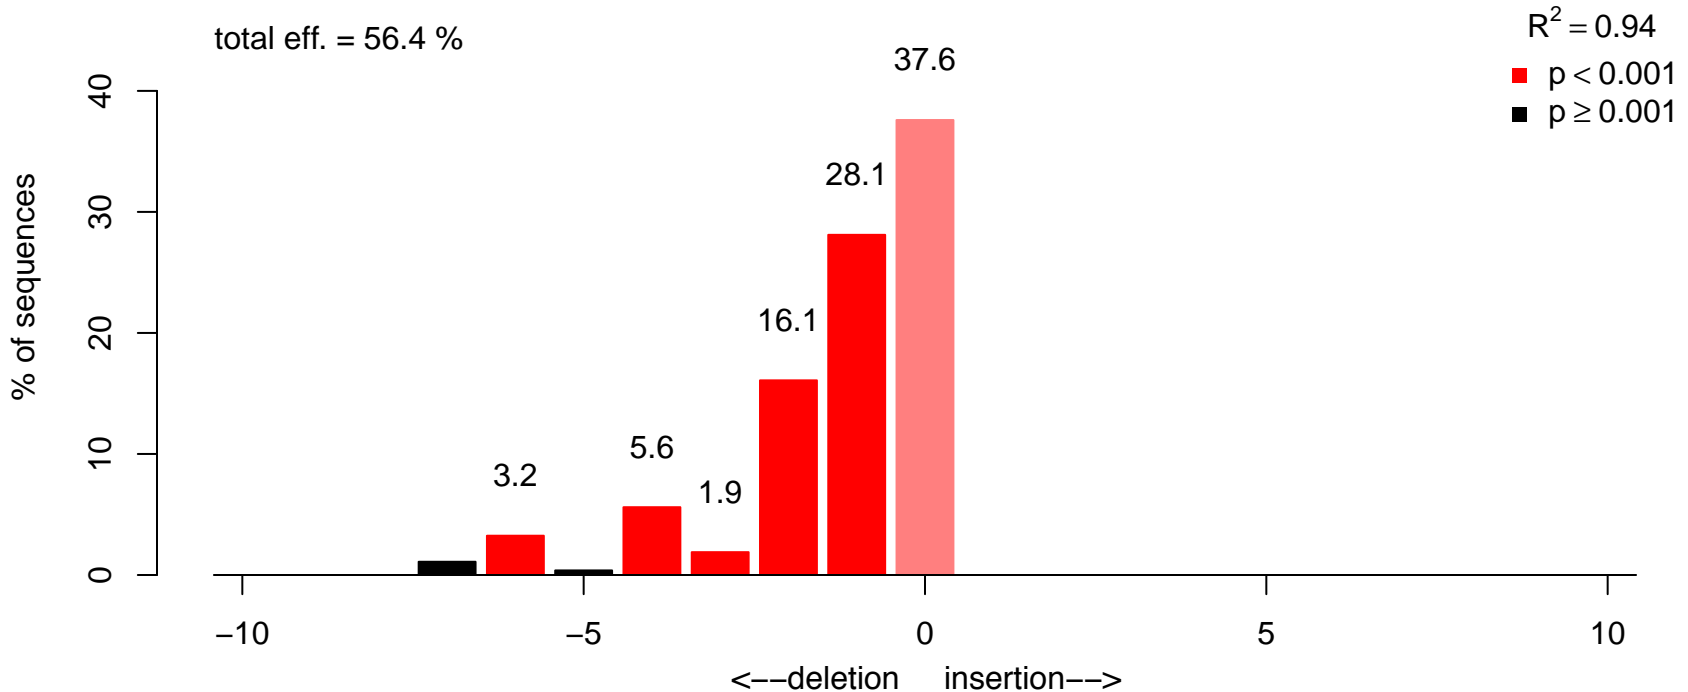

Warning: the spacing between the nucleotides in (one of) sanger sequence file(s) is not constant.

This might indicate for wrongly unannotated or wrongly additional annotated nucleotides.  
Decomposition window lower and check the chromatogram for abnormalities.

sample: WT/WT cell line, WT gRNA, reverse  
guide: GGGTGGGACAGAACATCCCC

region for decomposition

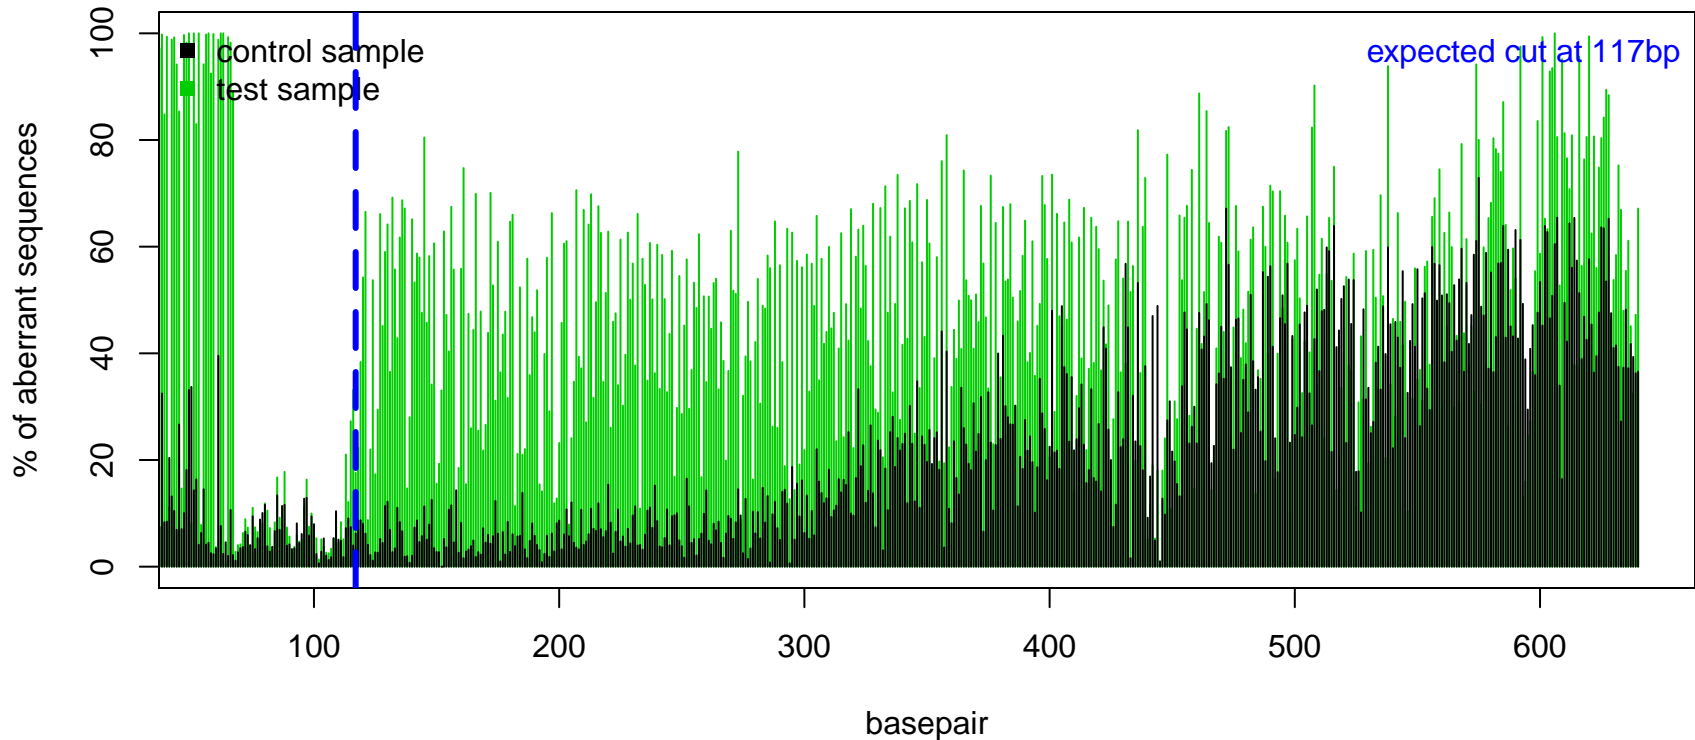

Warning: left boundary of decomposition window was adjusted 132 . It must be at least 5bp plus the maximum indel size downstream of the expected break site

sample: WT/WT cell line, gRNA 1.1, reverse  
guide: GGGTGGGACAGAACATCCCC

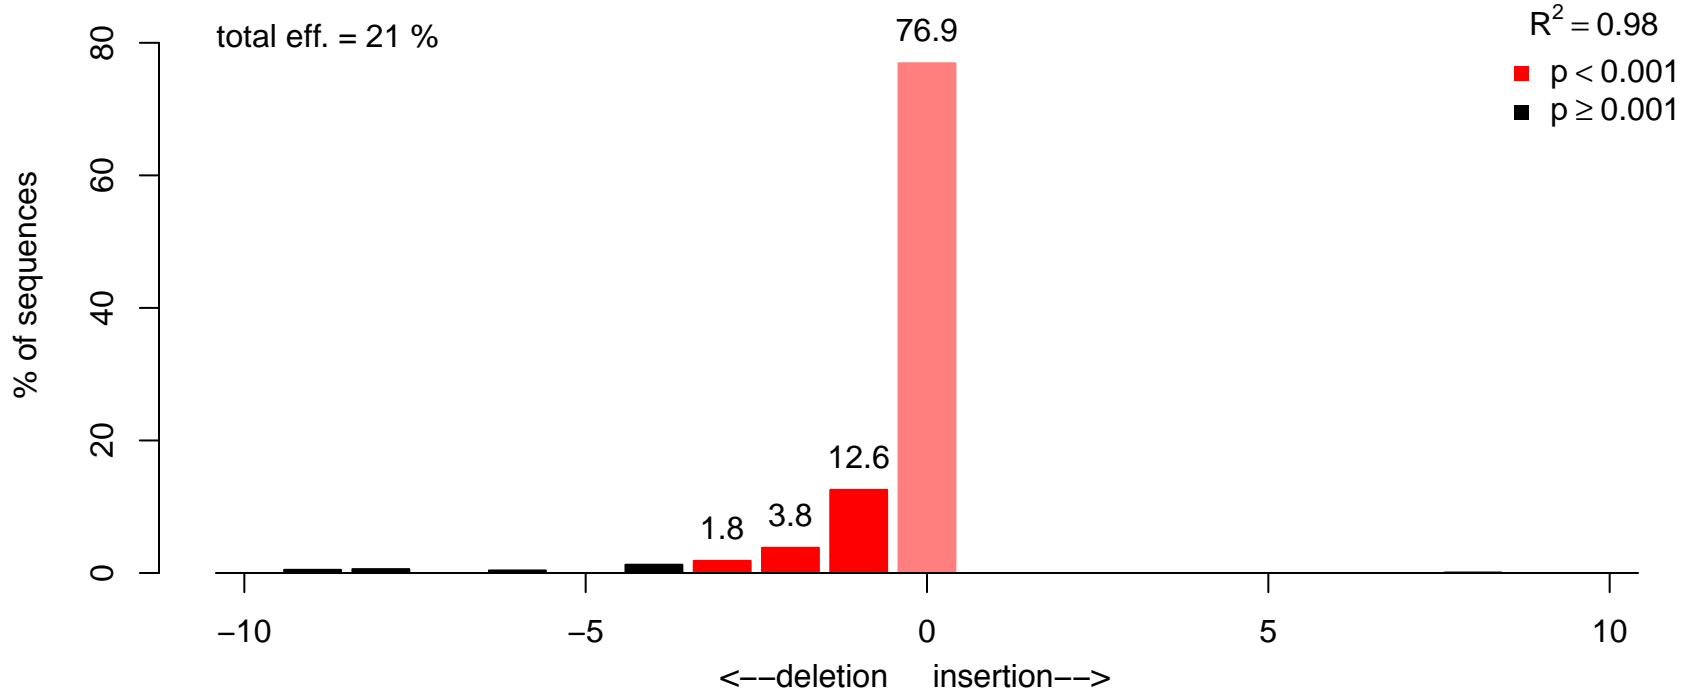

Warning: the spacing between the nucleotides in (one of) sanger sequence file(s) is not constant.

This might indicate for wrongly unannotated or wrongly additional annotated nucleotides.  
Decomposition window lower and check the chromatogram for abnormalities.



sample: WT/WT cell line, gRNA 1.1, reverse  
guide: GGGTGGGACAGAACATCCCC

region for decomposition

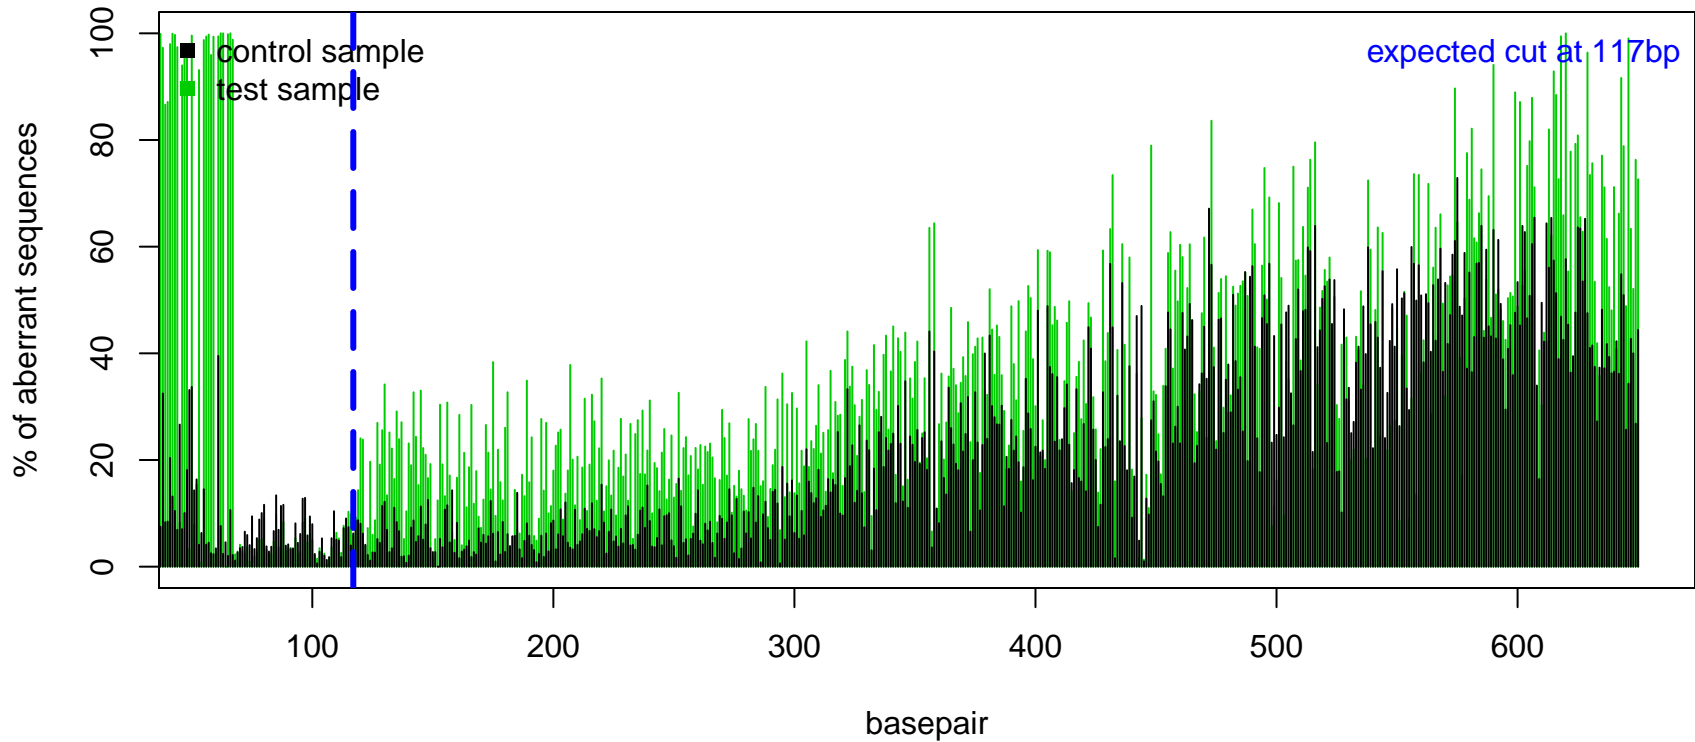

Warning: left boundary of decomposition window was adjusted 132 . It must be at least 5bp plus the maximum indel size downstream of the expected break site

sample: WT/WT cell line, gRNA 1.2, reverse  
guide: GGGTGGGACAGAACATCCCC

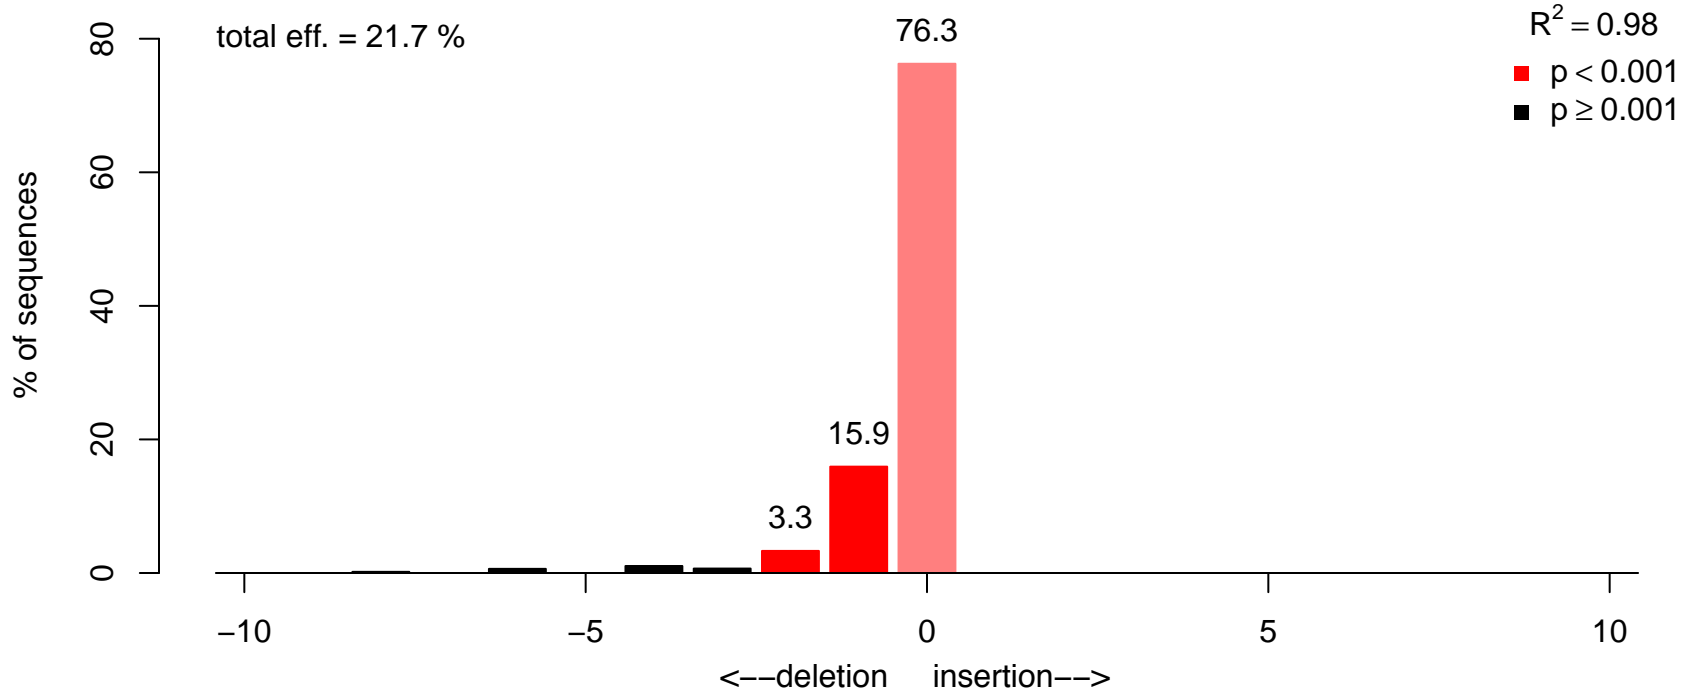

Warning: the spacing between the nucleotides in (one of) sanger sequence file(s) is not constant.

This might indicate for wrongly unannotated or wrongly additional annotated nucleotides.  
Decomposition window lower and check the chromatogram for abnormalities.

sample: WT/WT cell line, gRNA 1.2, reverse  
guide: GGGTGGGACAGAACATCCCC

region for decomposition

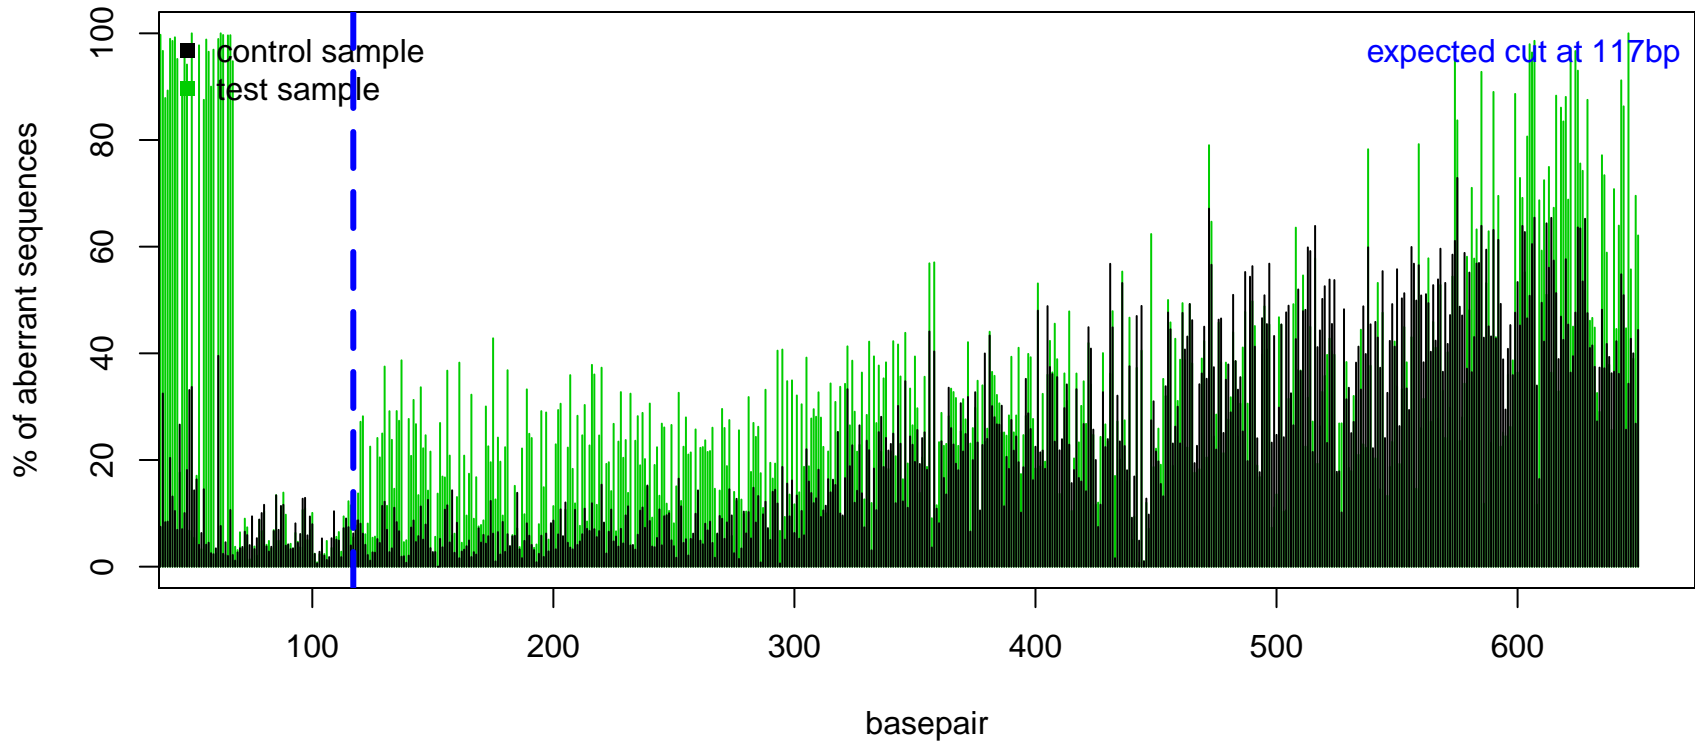

Warning: left boundary of decomposition window was adjusted 132 . It must be at least 5bp plus the maximum indel size downstream of the expected break site

sample: WT/WT cell line, gRNA 1.3, reverse  
guide: GGGTGGGACAGAACATCCCC

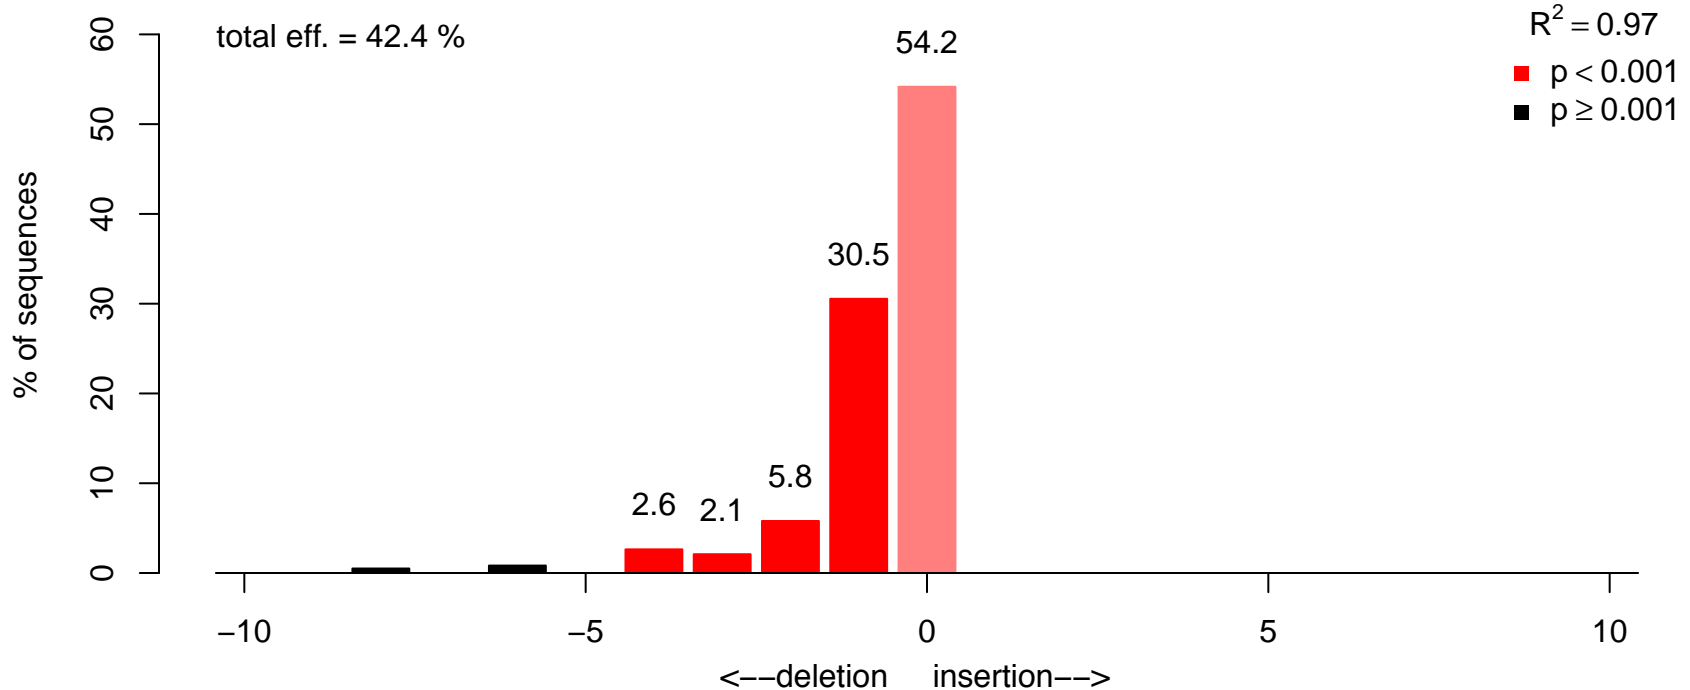

Warning: the spacing between the nucleotides in (one of) sanger sequence file(s) is not constant.

This might indicate for wrongly unannotated or wrongly additional annotated nucleotides.  
Decomposition window lower and check the chromatogram for abnormalities.

sample: WT/WT cell line, gRNA 1.3, reverse  
guide: GGGTGGGACAGAACATCCCC

region for decomposition

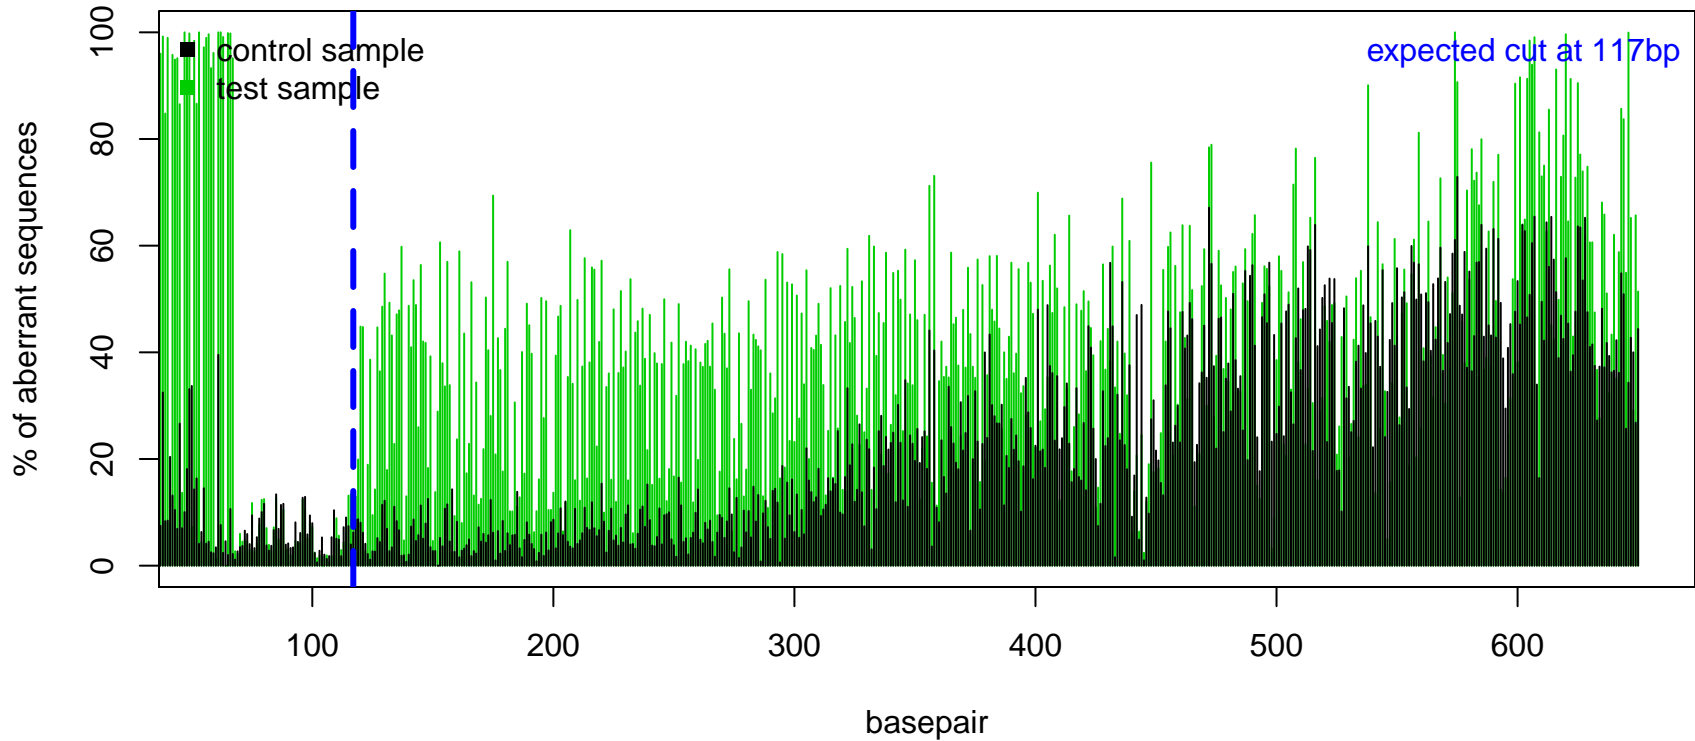

Warning: left boundary of decomposition window was adjusted 132 . It must be at least 5bp plus the maximum indel size downstream of the expected break site

sample: WT/WT cell line, gRNA 1.4, reverse  
guide: TGGGACAGAACATCCCCAGG

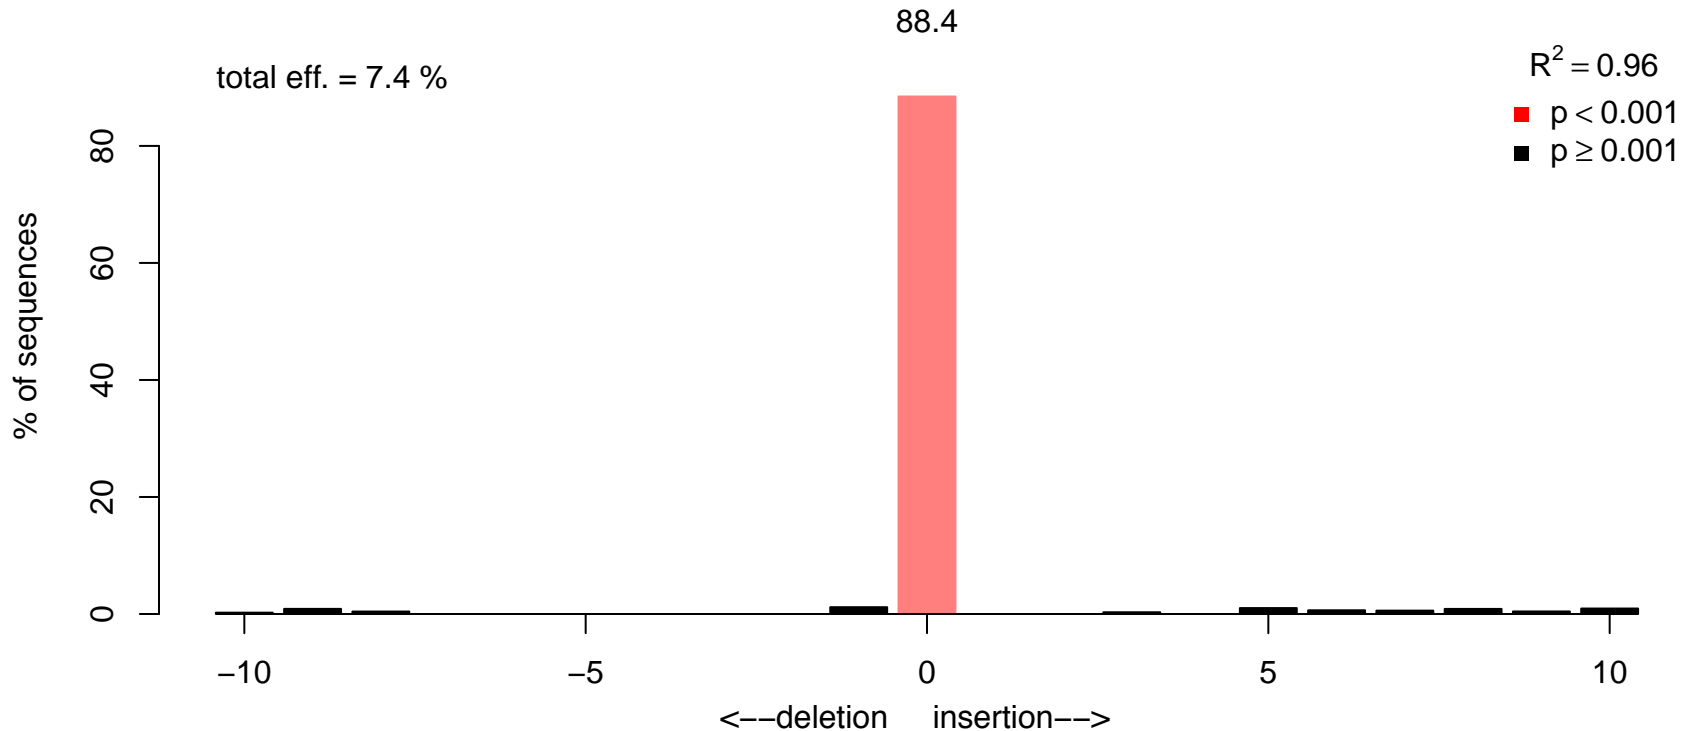

Warning: the spacing between the nucleotides in (one of) sanger sequence file(s) is not constant.

This might indicate for wrongly unannotated or wrongly additional annotated nucleotides.  
Decomposition window lower and check the chromatogram for abnormalities.

sample: WT/WT cell line, gRNA 1.4, reverse  
guide: TGGGACAGAACATCCCCAGG

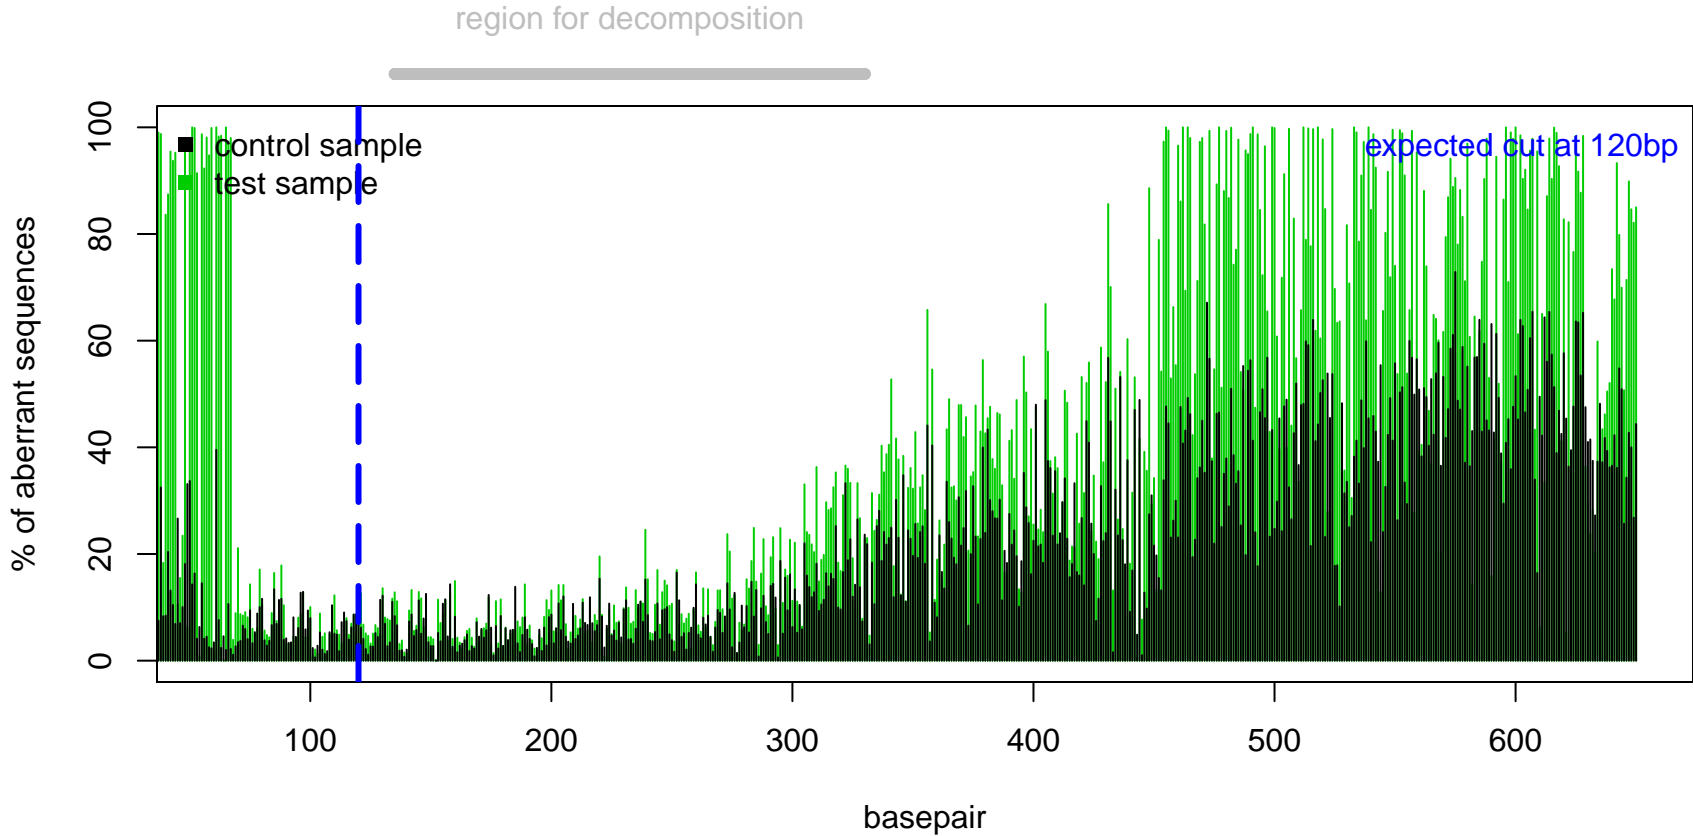

Warning: left boundary of decomposition window was adjusted 135 . It must be at least 5bp plus the maximum indel size downstream of the expected break site

sample: WT/WT cell line, gRNA 2.1, reverse  
guide: TGGGACAGAACATCCCCAGG

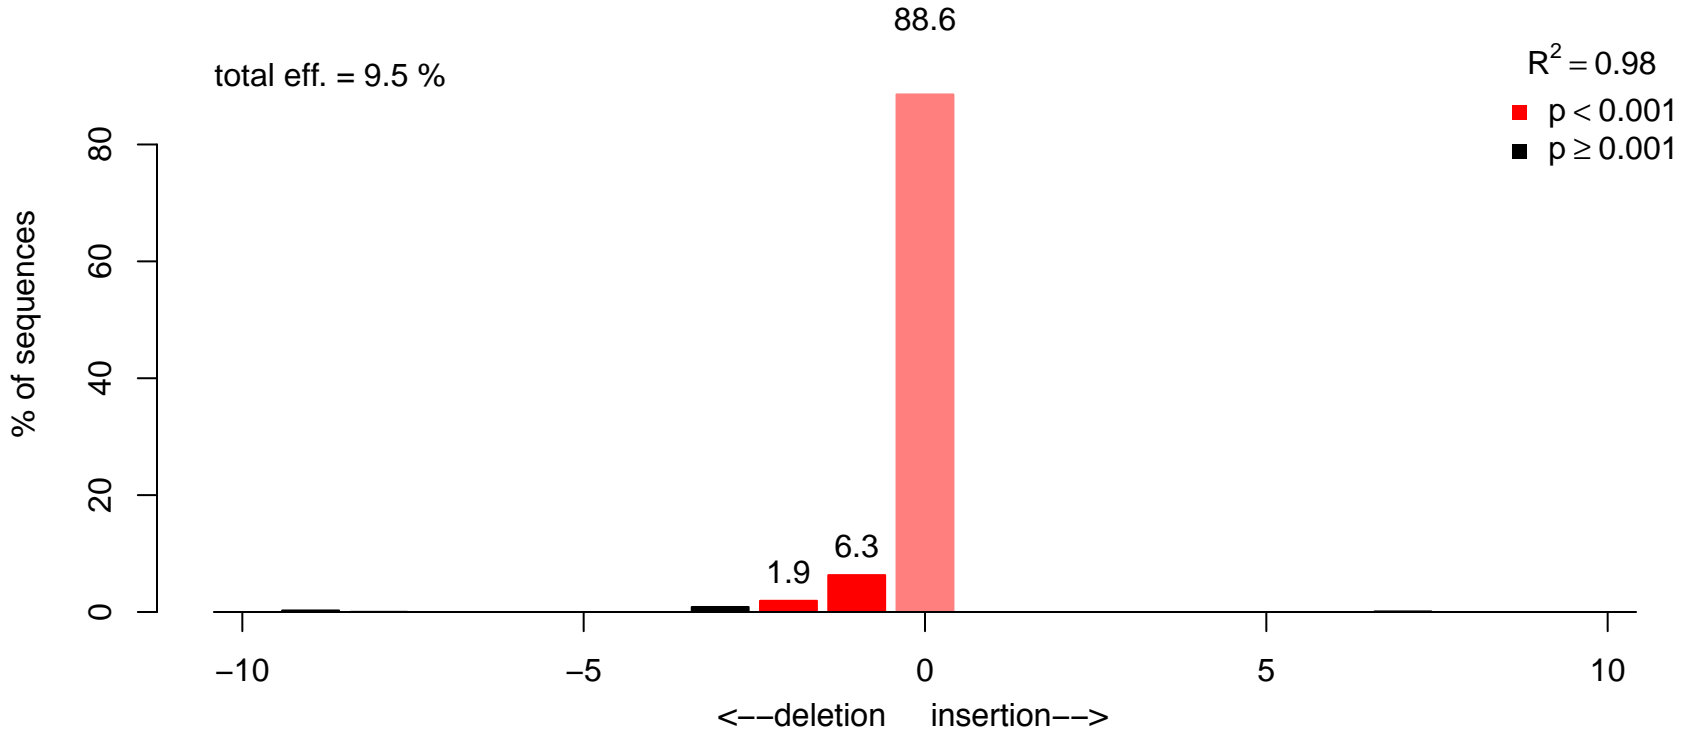

Warning: the spacing between the nucleotides in (one of) sanger sequence file(s) is not constant.

This might indicate for wrongly unannotated or wrongly additional annotated nucleotides.  
Decomposition window lower and check the chromatogram for abnormalities.



sample: WT/WT cell line, gRNA 2.1, reverse  
guide: TGGGACAGAACATCCCCAGG

region for decomposition

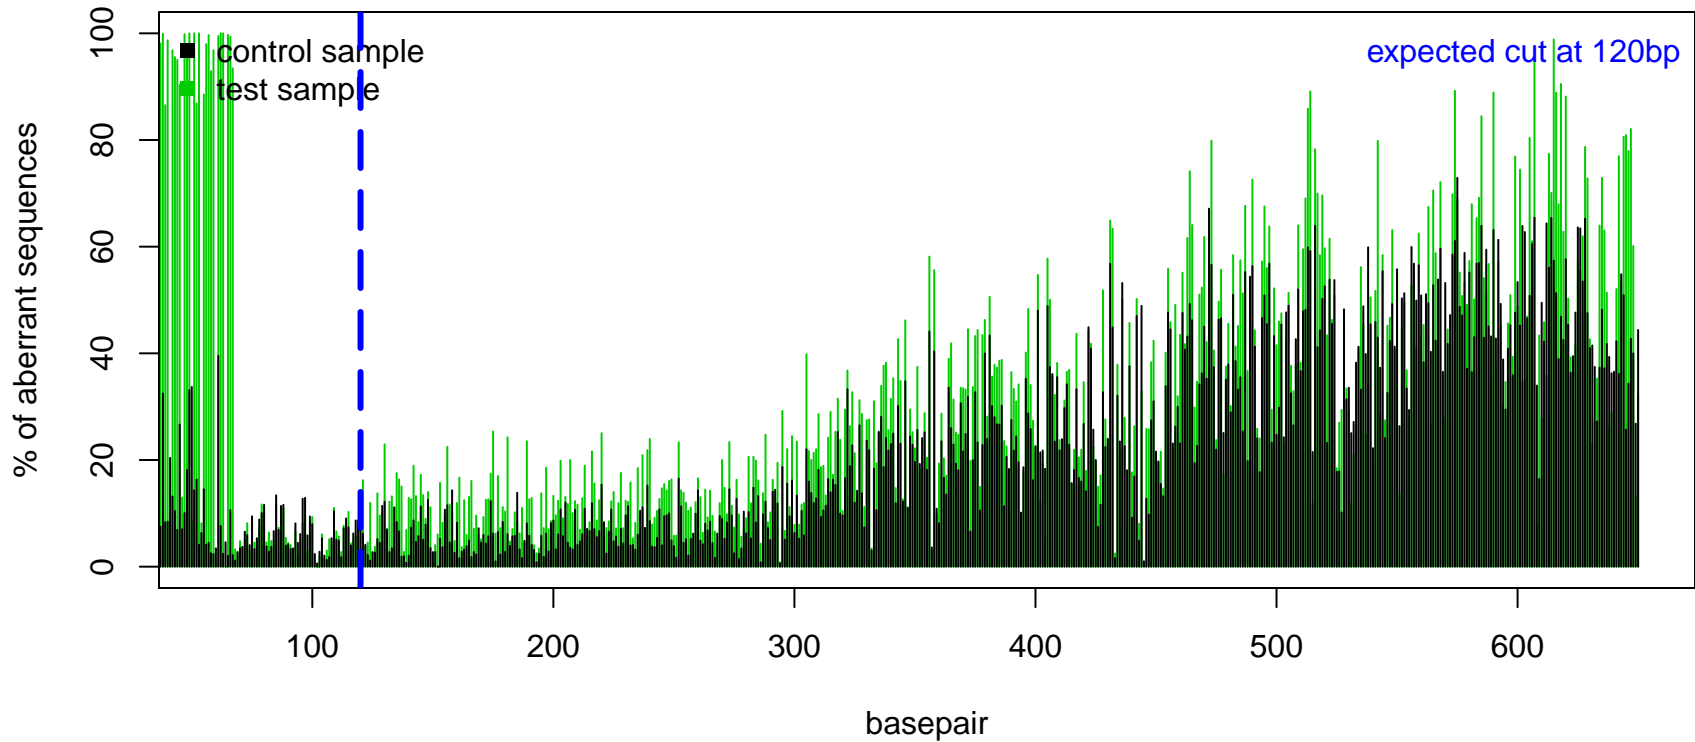

Warning: left boundary of decomposition window was adjusted 135 . It must be at least 5bp plus the maximum indel size downstream of the expected break site

sample: WT/WT cell line, gRNA 2.2, reverse  
guide: TGGGACAGAACATCCCCAGG

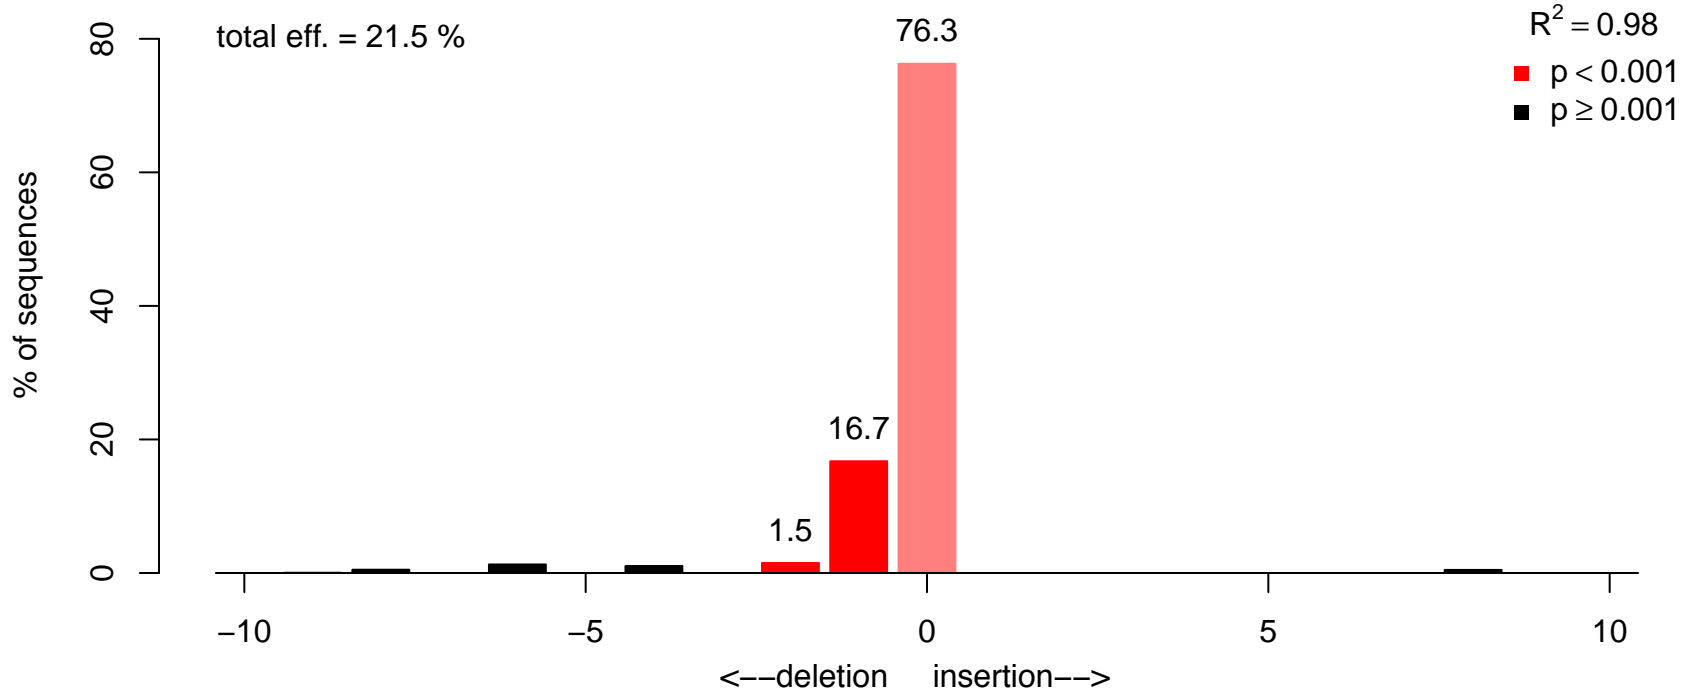

Warning: the spacing between the nucleotides in (one of) sanger sequence file(s) is not constant.

This might indicate for wrongly unannotated or wrongly additional annotated nucleotides.  
Decomposition window lower and check the chromatogram for abnormalities.

sample: WT/WT cell line, gRNA 2.2, reverse  
guide: TGGGACAGAACATCCCCAGG

region for decomposition

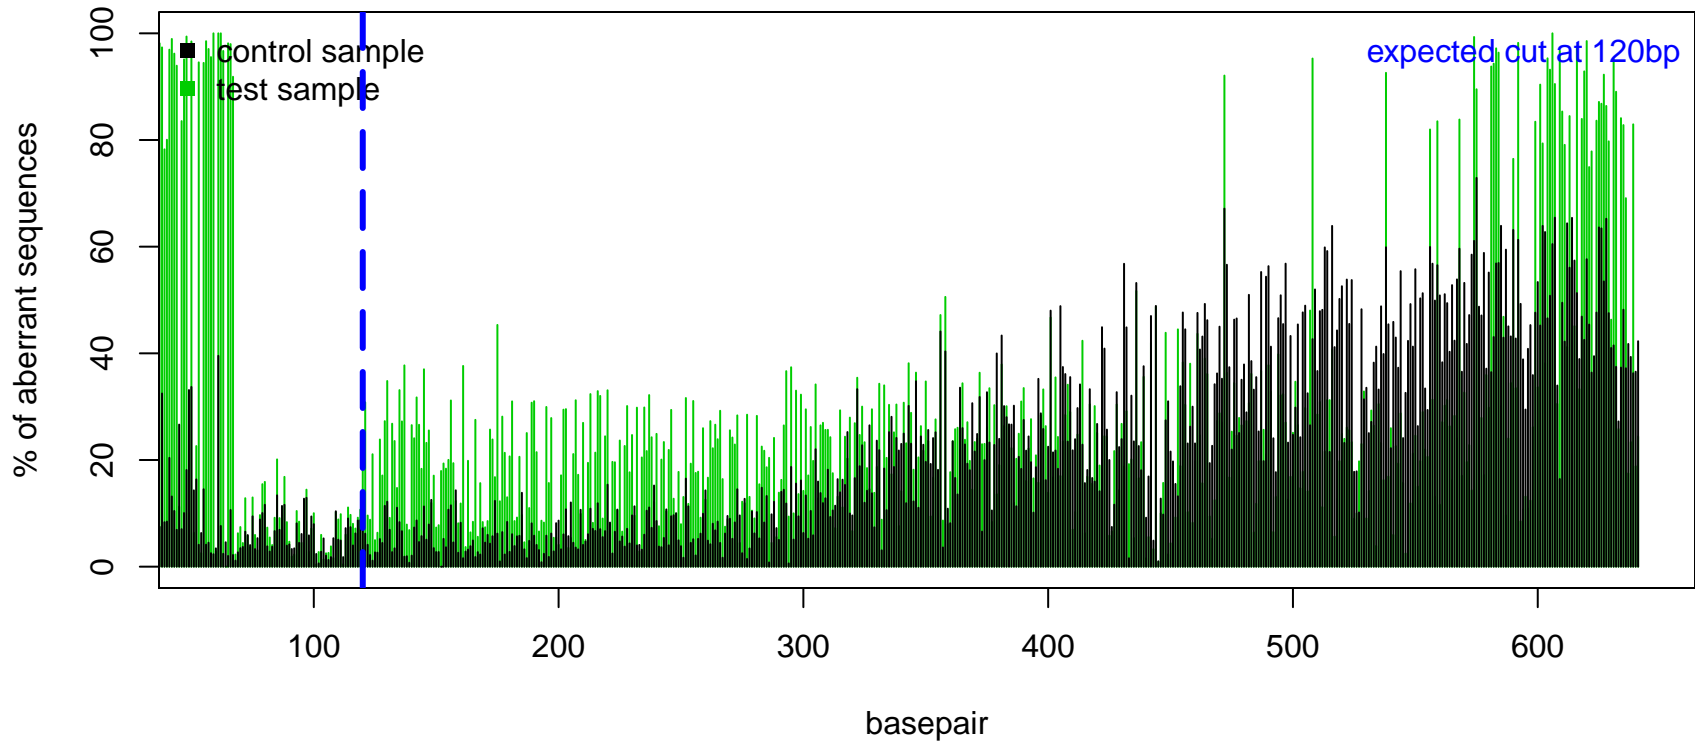

Warning: left boundary of decomposition window was adjusted 135 . It must be at least 5bp plus the maximum indel size downstream of the expected break site

sample: WT/WT cell line, gRNA 2.3, reverse  
guide: TGGGACAGAACATCCCCAGG

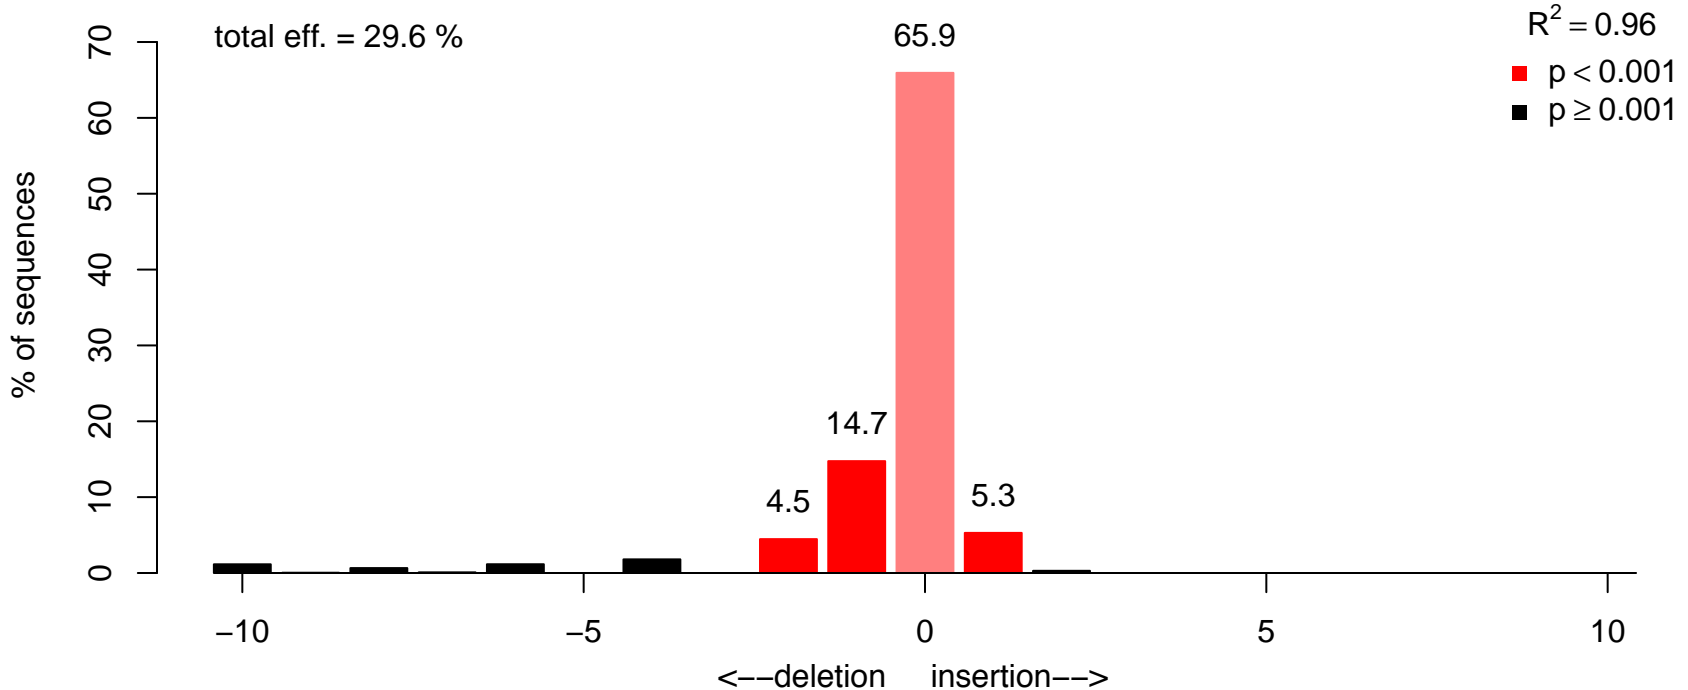

Warning: the spacing between the nucleotides in (one of) sanger sequence file(s) is not constant.

This might indicate for wrongly unannotated or wrongly additional annotated nucleotides.  
Decomposition window lower and check the chromatogram for abnormalities.

sample: WT/WT cell line, gRNA 2.3, reverse  
guide: TGGGACAGAACATCCCCAGG

region for decomposition

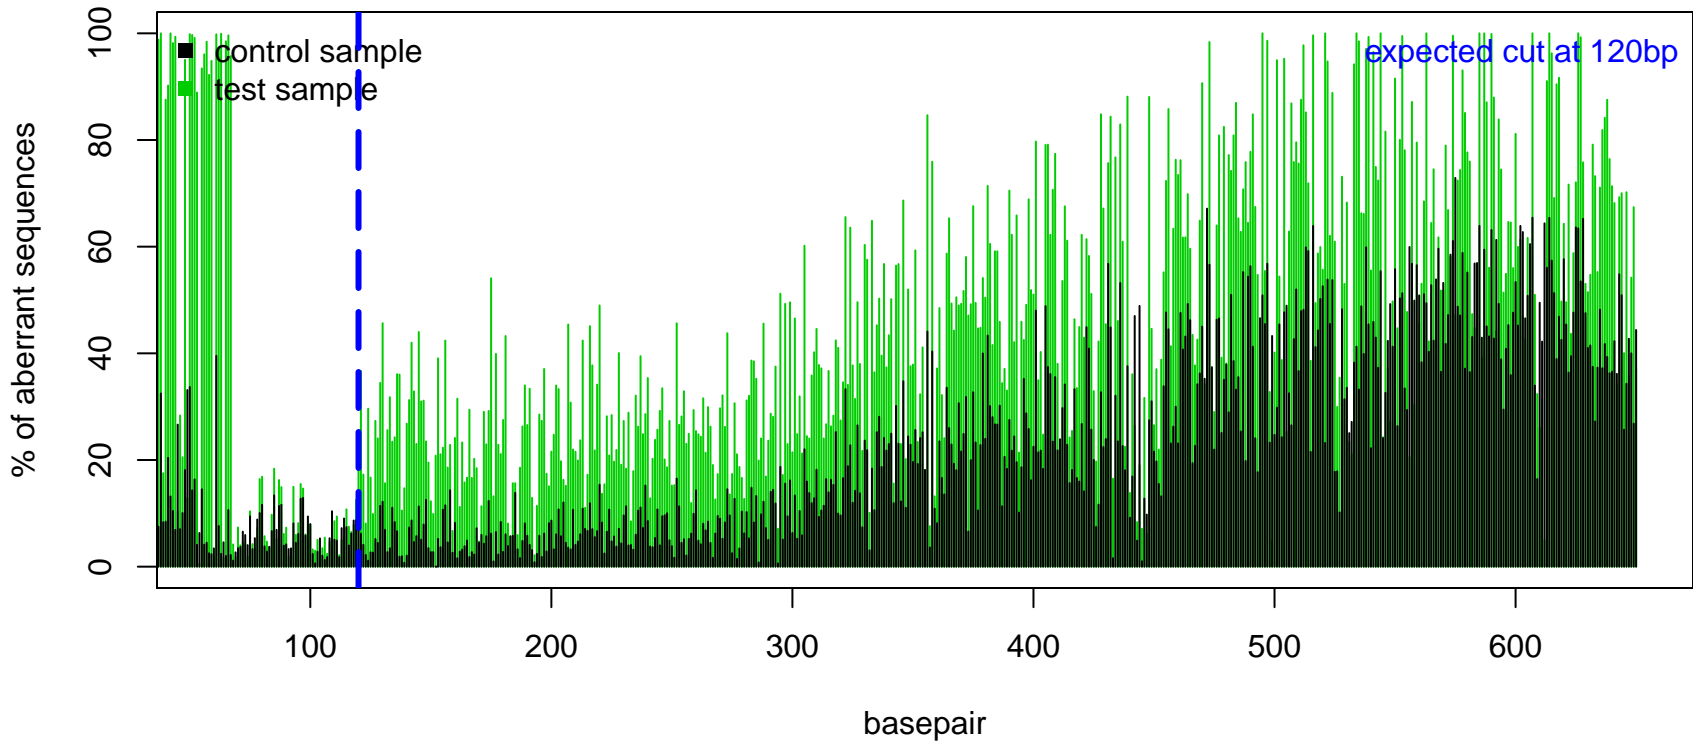

Warning: left boundary of decomposition window was adjusted 135 . It must be at least 5bp plus the maximum indel size downstream of the expected break site

sample: WT/WT cell line, gRNA 2.4, reverse  
guide: TGGTAATGTCCCTCCTGGGG

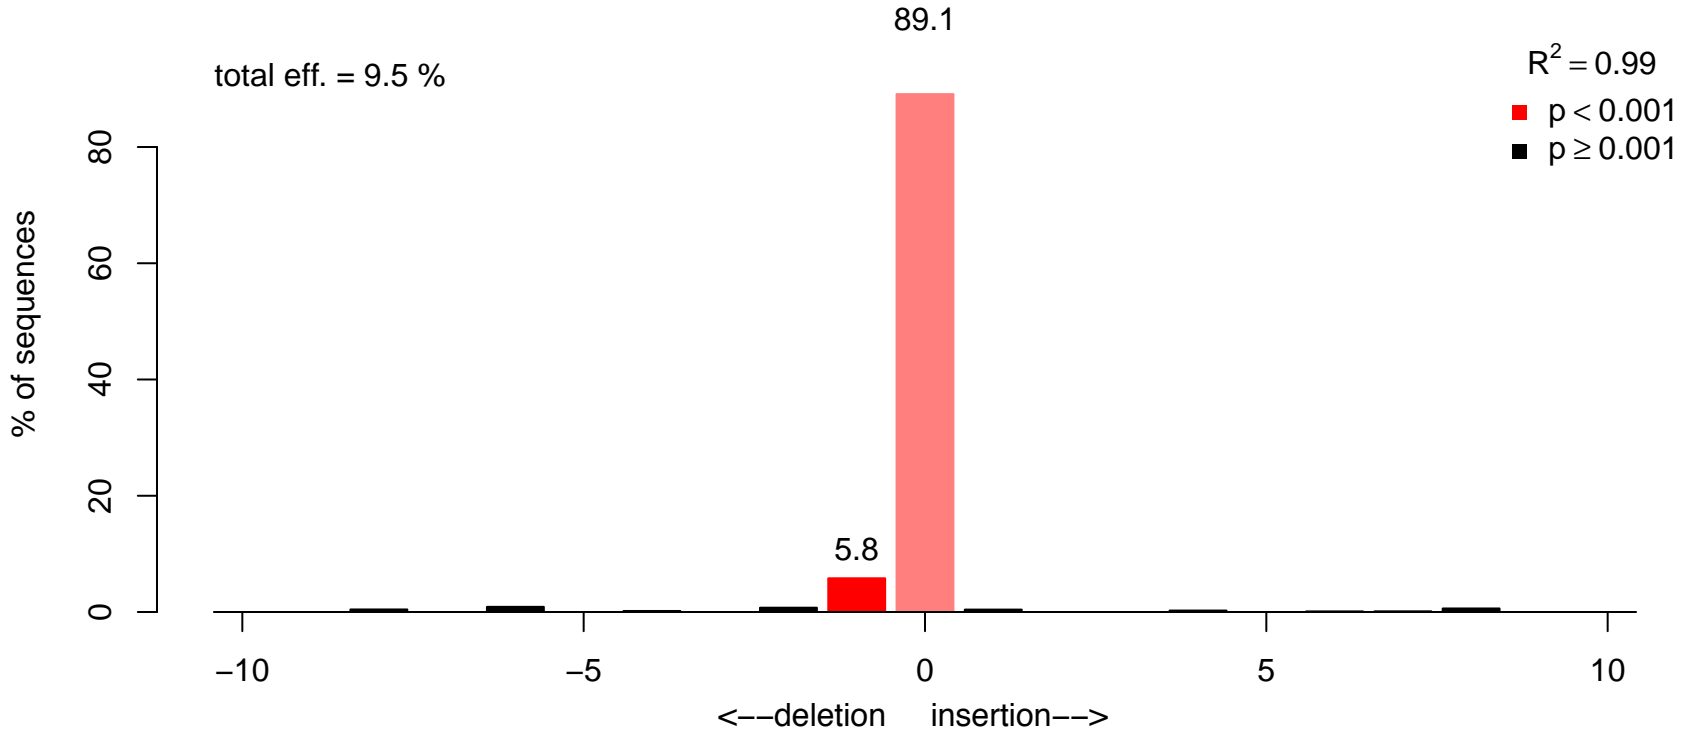

Warning: the spacing between the nucleotides in (one of) sanger sequence file(s) is not constant.

This might indicate for wrongly unannotated or wrongly additional annotated nucleotides.  
Decomposition window lower and check the chromatogram for abnormalities.

sample: WT/WT cell line, gRNA 2.4, reverse  
guide: TGGTAATGTCCCTCCTGGGG

region for decomposition

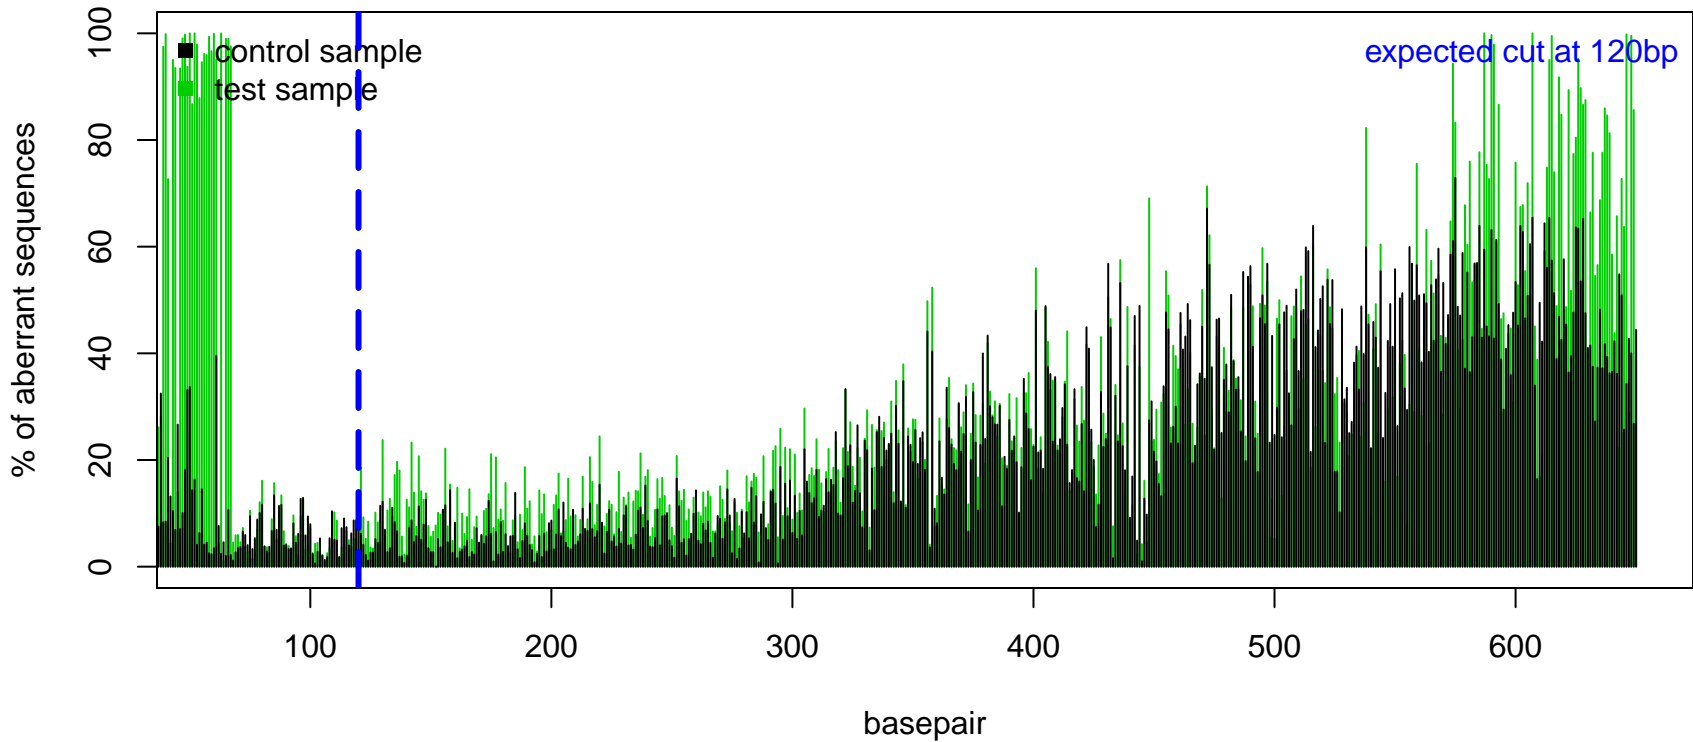

Warning: left boundary of decomposition window was adjusted 135 . It must be at least 5bp plus the maximum indel size downstream of the expected break site

sample: WT/WT cell line, gRNA 3.1, reverse  
guide: TGGTAATGTCCCTCCTGGGG

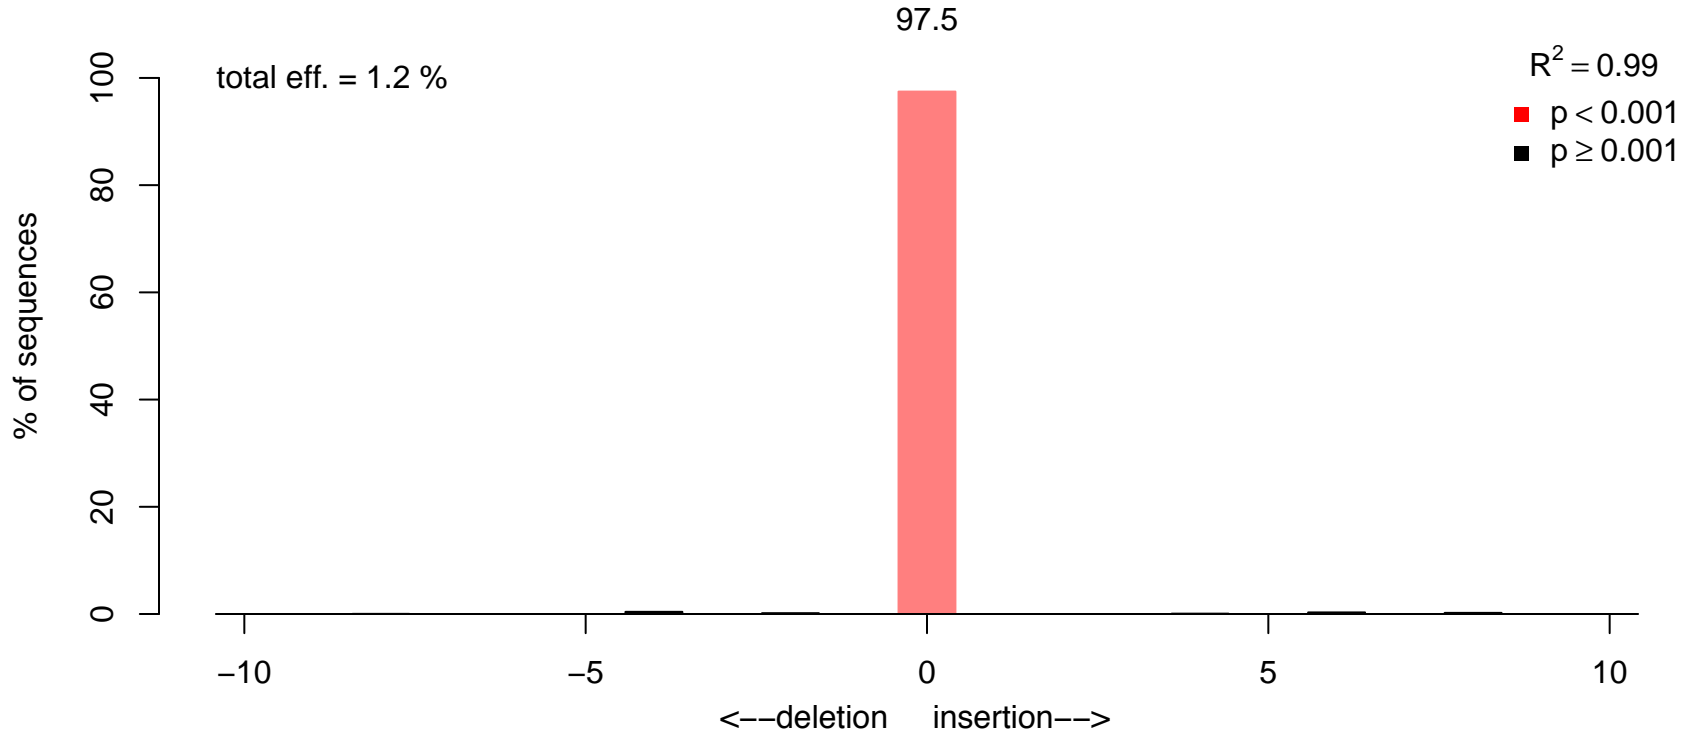

Warning: the spacing between the nucleotides in (one of) sanger sequence file(s) is not constant.

This might indicate for wrongly unannotated or wrongly additional annotated nucleotides.  
Decomposition window lower and check the chromatogram for abnormalities.



sample: WT/WT cell line, gRNA 3.1, reverse  
guide: TGGTAATGTCCCTCCTGGGG

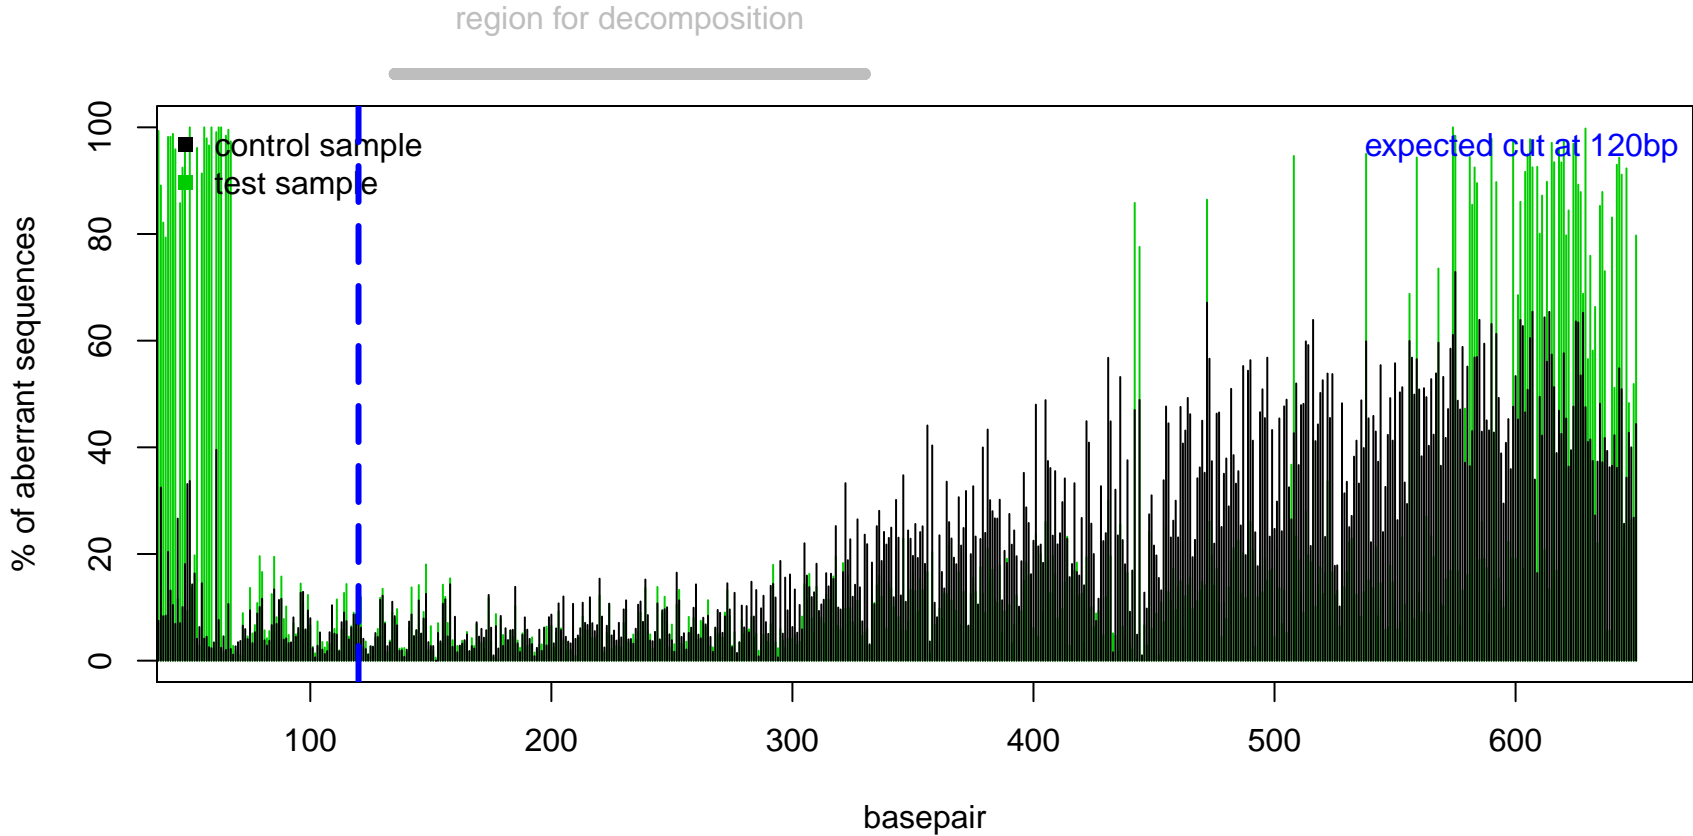

Warning: left boundary of decomposition window was adjusted 135 . It must be at least 5bp plus the maximum indel size downstream of the expected break site

sample: WT/WT cell line, gRNA 3.2, reverse  
guide: TGGTAATGTCCCTCCTGGGG

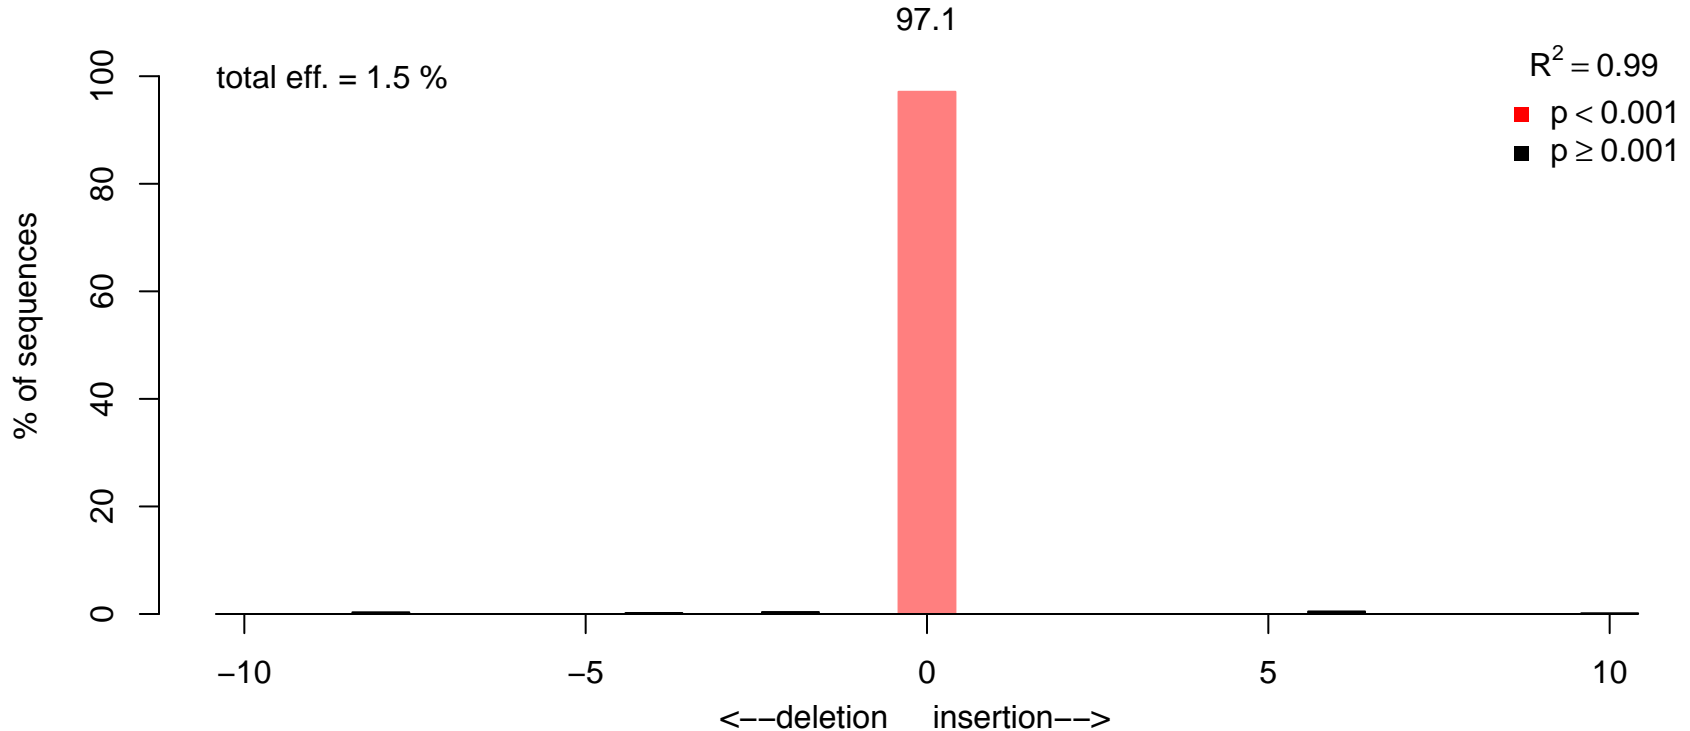

Warning: the spacing between the nucleotides in (one of) sanger sequence file(s) is not constant.

This might indicate for wrongly unannotated or wrongly additional annotated nucleotides.  
Decomposition window lower and check the chromatogram for abnormalities.

sample: WT/WT cell line, gRNA 3.2, reverse  
guide: TGGTAATGTCCCTCCTGGGG

region for decomposition

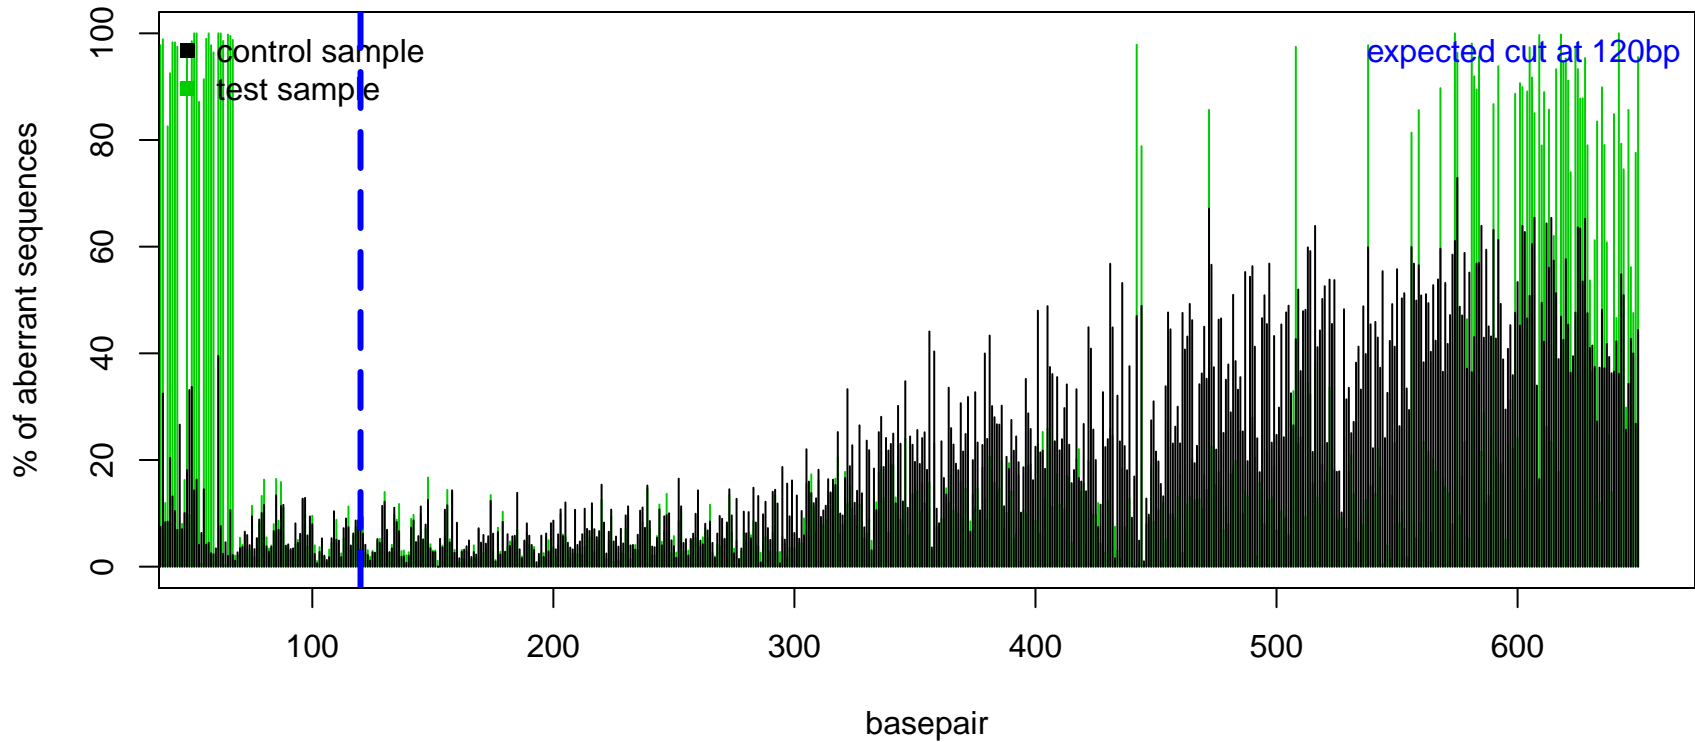

Warning: left boundary of decomposition window was adjusted 135 . It must be at least 5bp plus the maximum indel size downstream of the expected break site

sample: WT/WT cell line, gRNA 3.3, reverse  
guide: GGGTGGGACAGAACATCCCC

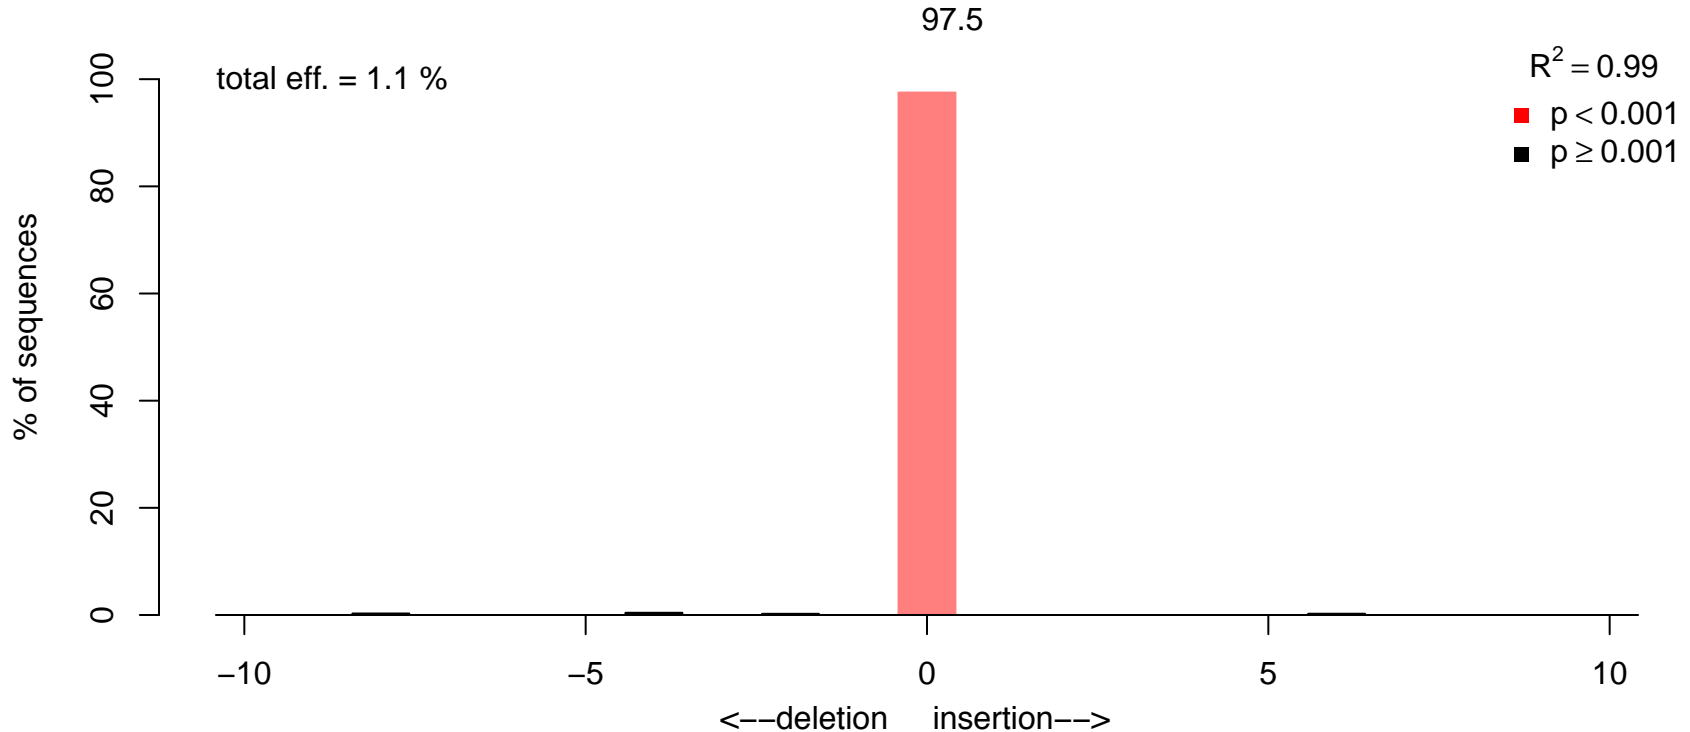

Warning: the spacing between the nucleotides in (one of) sanger sequence file(s) is not constant.

This might indicate for wrongly unannotated or wrongly additional annotated nucleotides.  
Decomposition window lower and check the chromatogram for abnormalities.

sample: WT/WT cell line, gRNA 3.3, reverse  
guide: GGGTGGGACAGAACATCCCC

region for decomposition

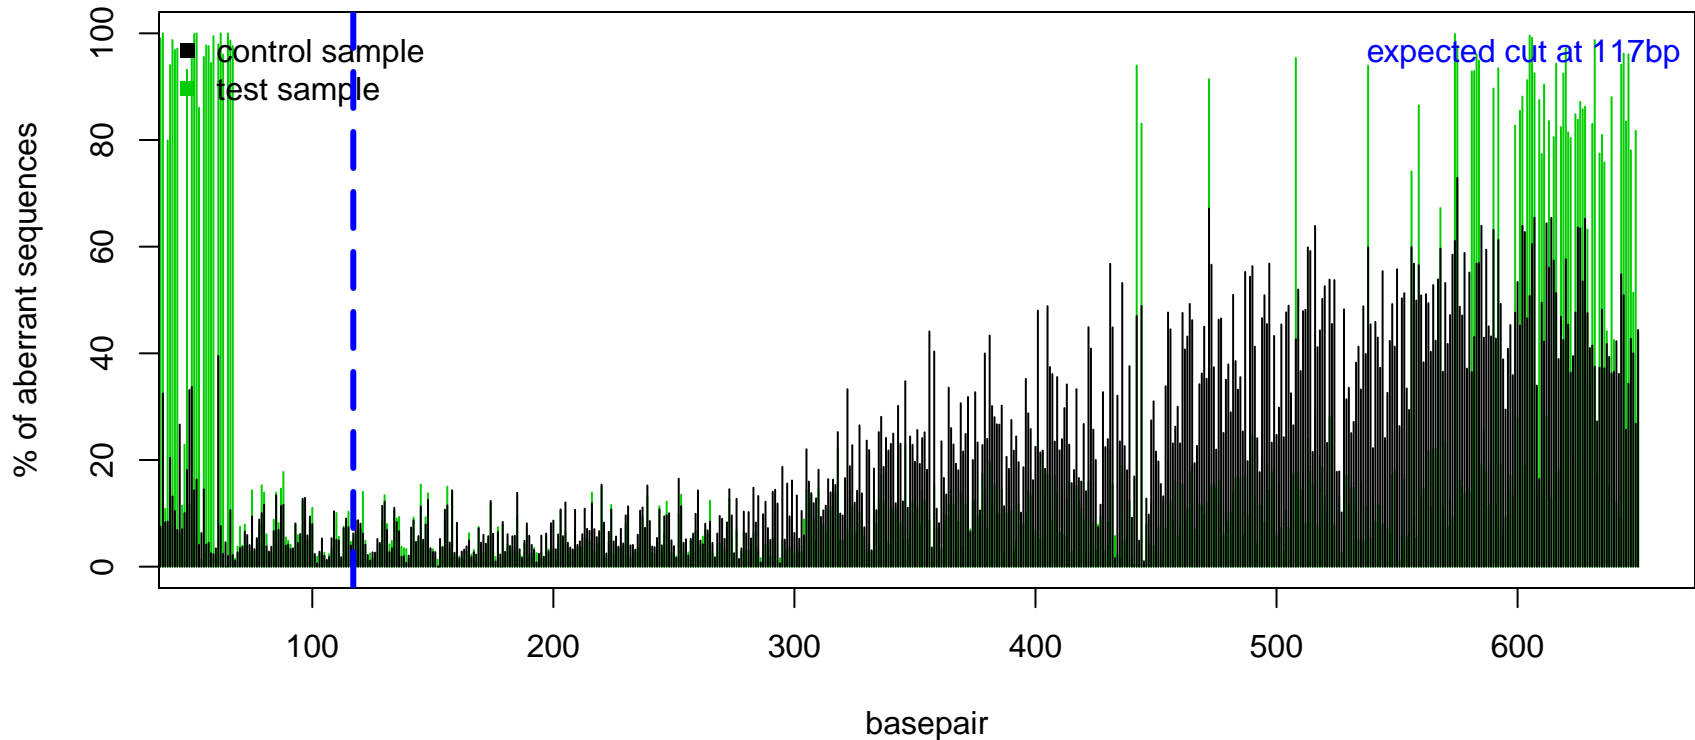

Warning: left boundary of decomposition window was adjusted 132 . It must be at least 5bp plus the maximum indel size downstream of the expected break site

sample: WT/WT cell line, gRNA WT, forward  
guide: GGGTGGGACAGAACATCCCC

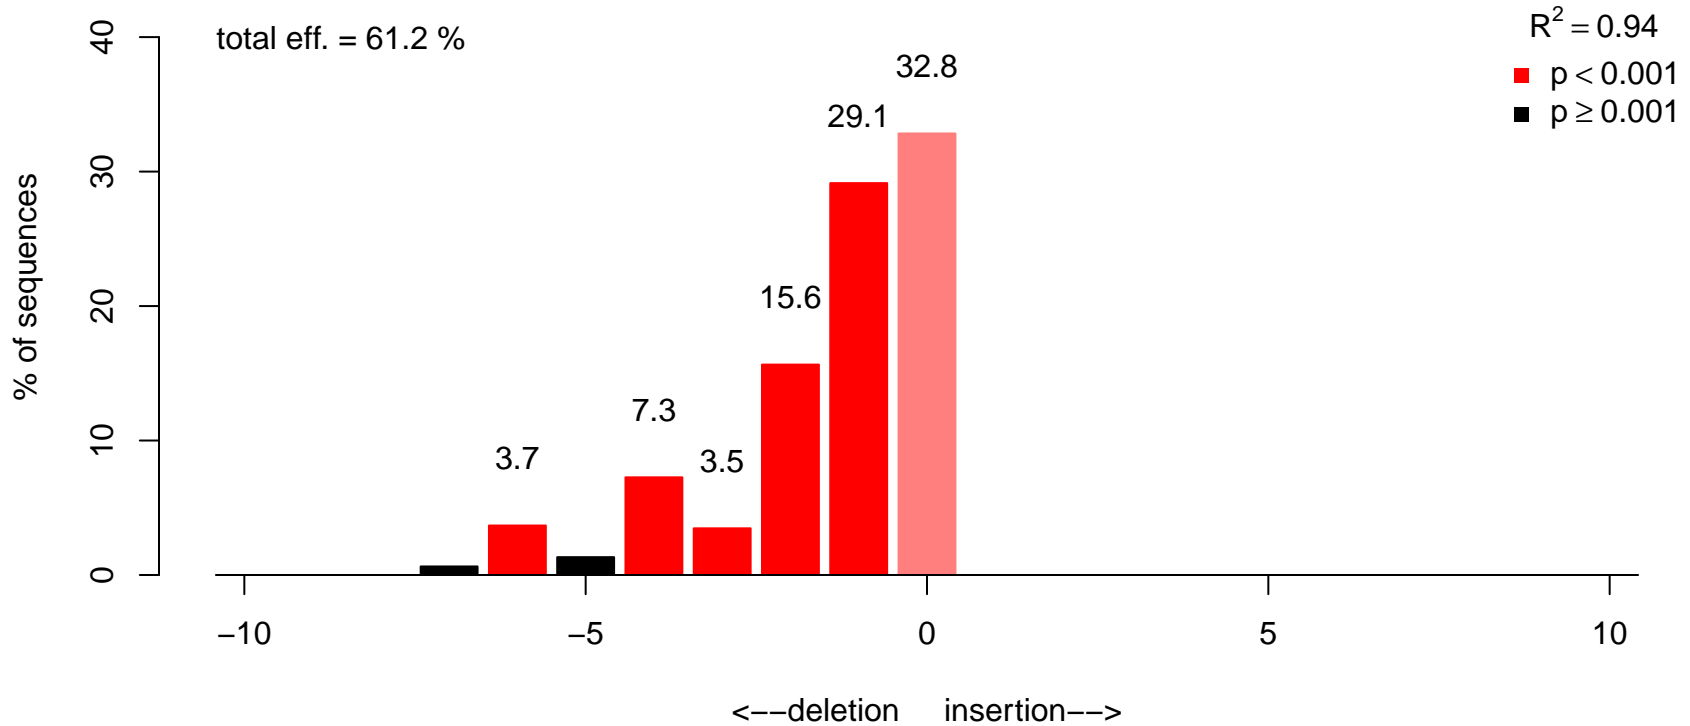

sample: WT/WT cell line, gRNA WT, forward  
guide: GGGTGGGACAGAACATCCCC

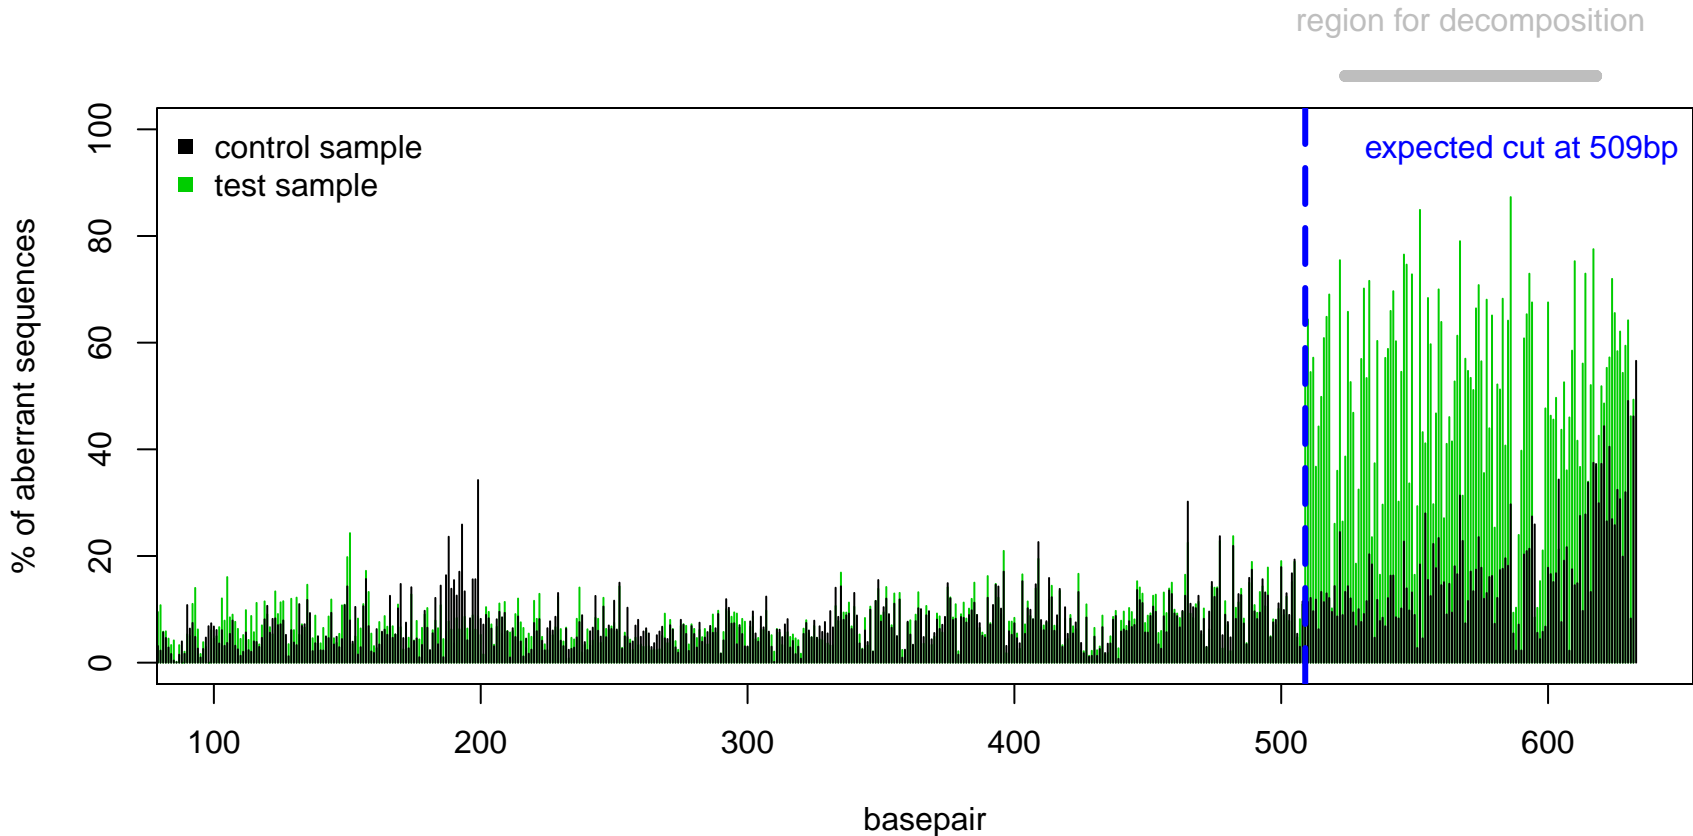

Warning: left boundary of decomposition window was adjusted 524 . It must be at least 5bp plus the maximum indel size downstream of the expected break site

Warning: right boundary of decomposition window was adjusted to 618 . It must be at least 5bp plus the maximum indel size downstream of the expected break site

sample: WT/WT cell line, gRNA 1.1, forward  
guide: GGGTGGGACAGAACATCCCC

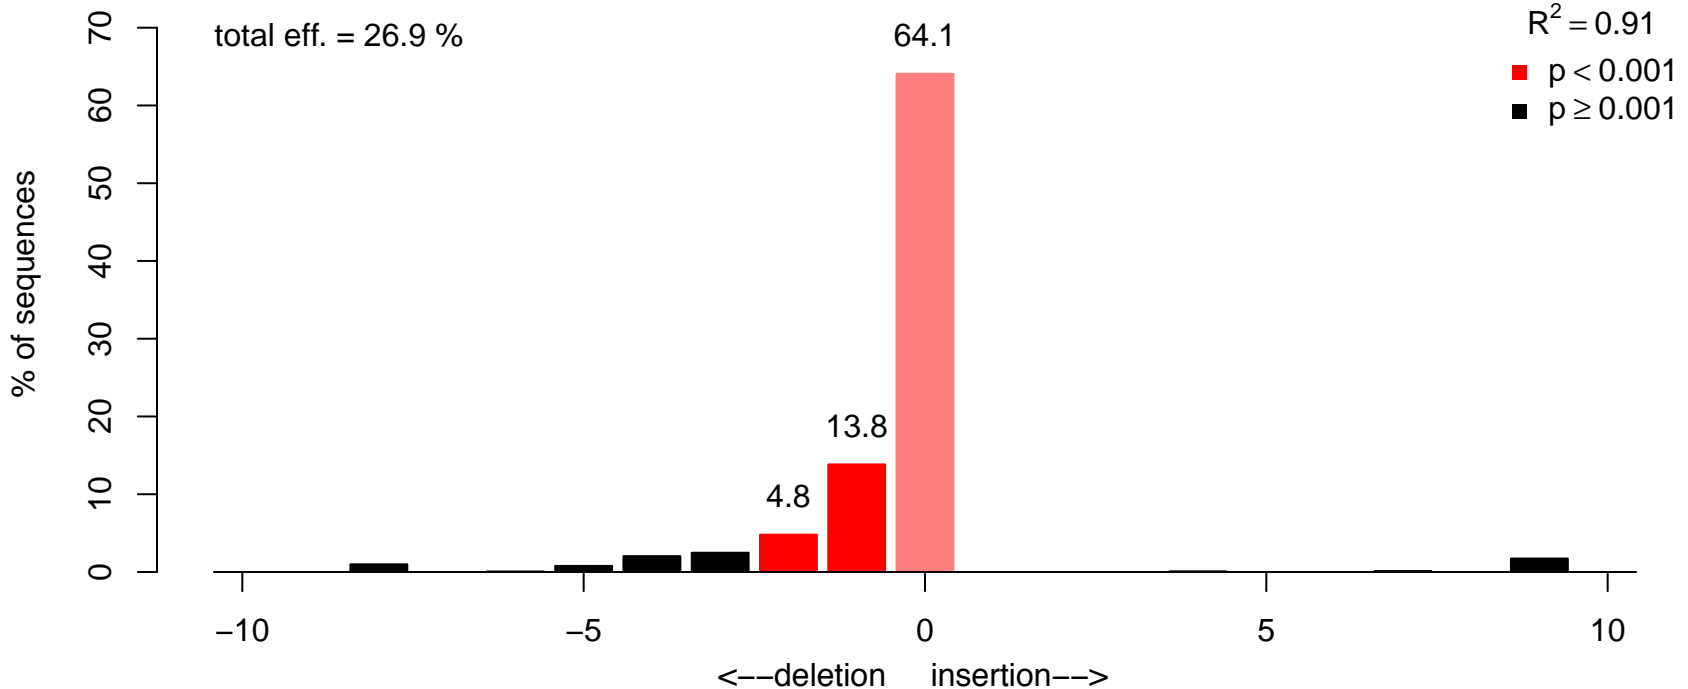

Warning: the spacing between the nucleotides in (one of) sanger sequence file(s) is not constant.

This might indicate for wrongly unannotated or wrongly additional annotated nucleotides.  
Decomposition window lower and check the chromatogram for abnormalities.



sample: WT/WT cell line, gRNA 1.1, forward  
guide: GGGTGGGACAGAACATCCCC

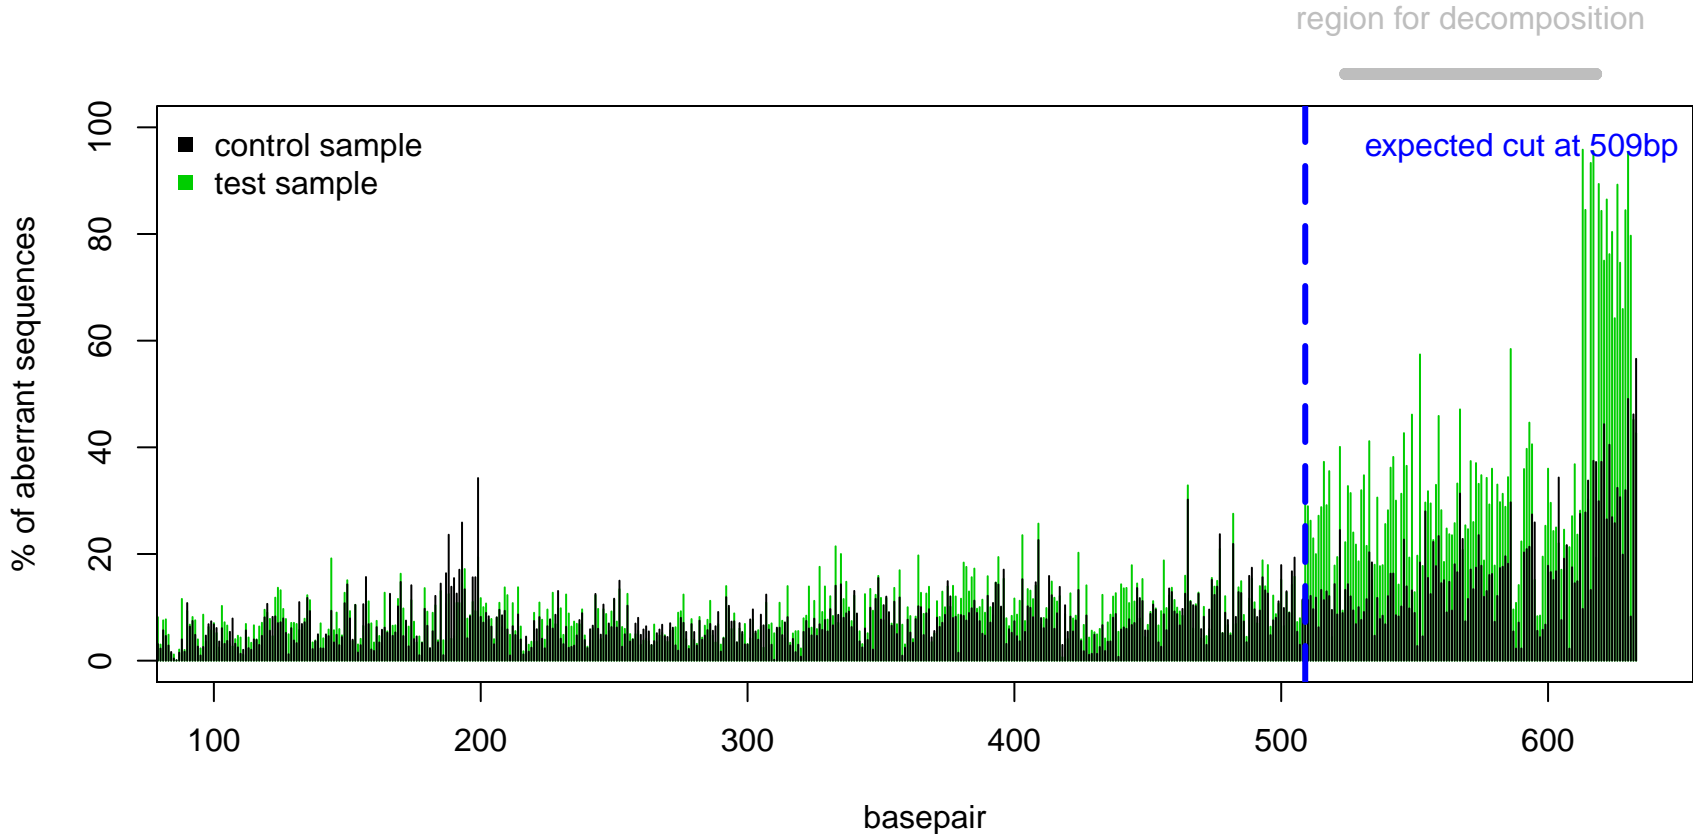

Warning: left boundary of decomposition window was adjusted 524 . It must be at least 5bp plus the maximum indel size downstream of the expected break site

Warning: right boundary of decomposition window was adjusted to 618 . It must be at least 5bp plus the maximum indel size downstream of the expected break site

sample: WT/WT cell line, gRNA 1.2, forward  
guide: GGGTGGGACAGAACATCCCC

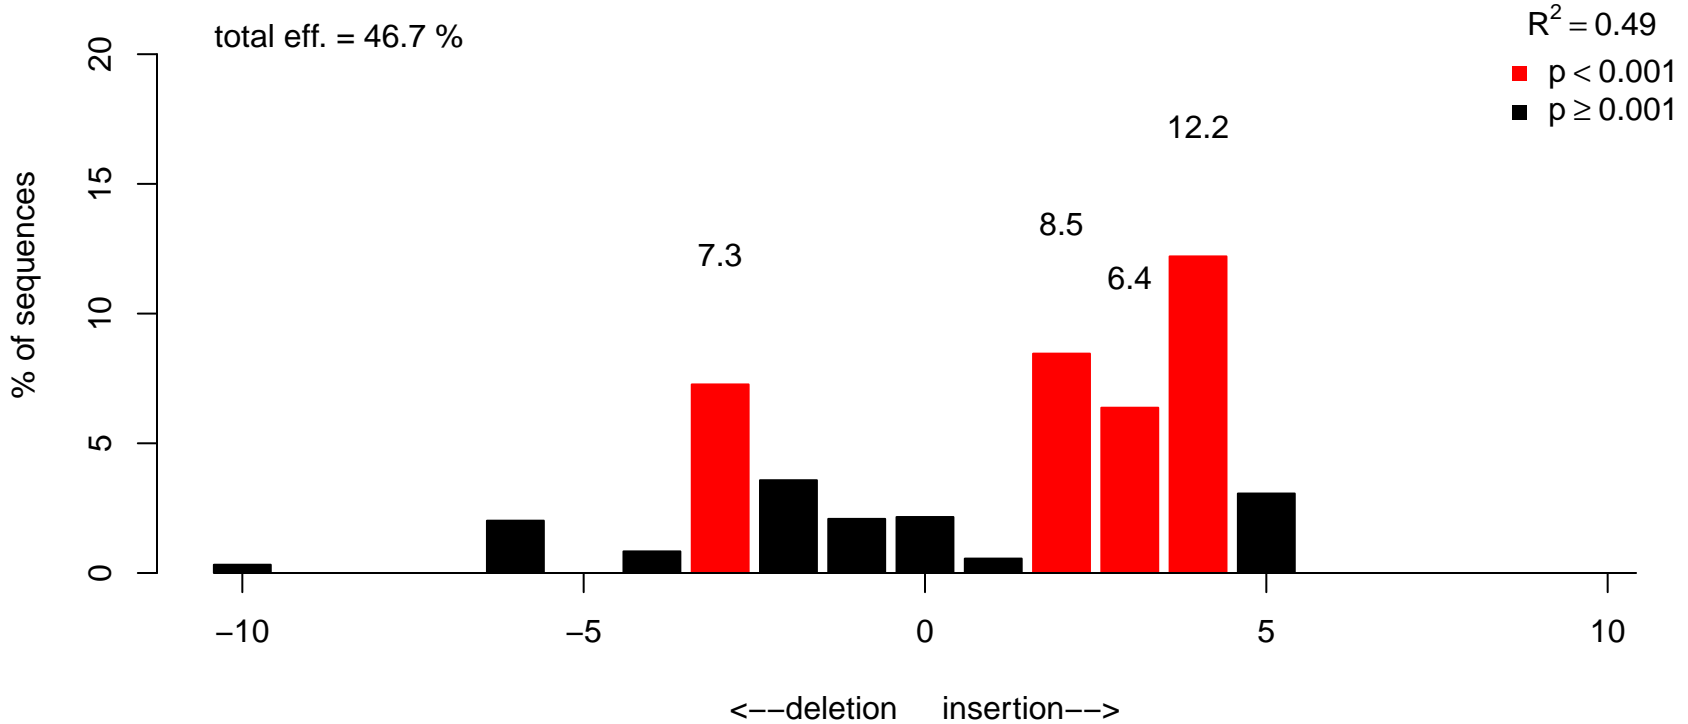

sample: WT/WT cell line, gRNA 1.2, forward  
guide: GGGTGGGACAGAACATCCCC

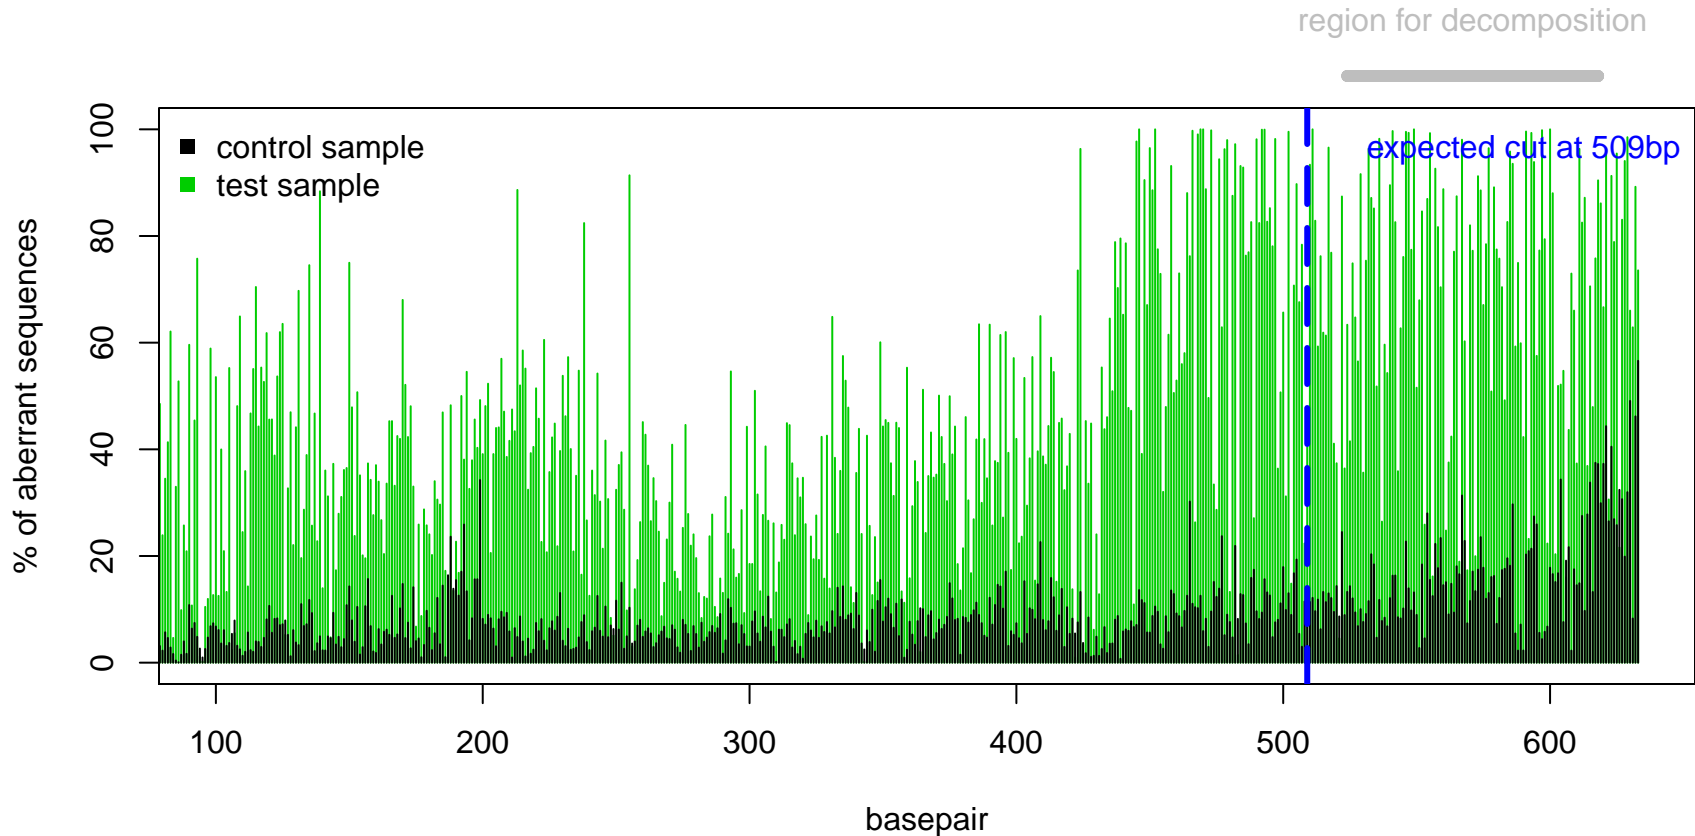

Warning: left boundary of decomposition window was adjusted 524 . It must be at least 5bp plus the maximum indel size downstream of the expected break site

Warning: right boundary of decomposition window was adjusted to 618 . It must be at least 5bp plus the maximum indel size downstream of the expected break site

sample: WT/WT cell line, gRNA 1.3, forward  
guide: GGGTGGGACAGAACATCCCC

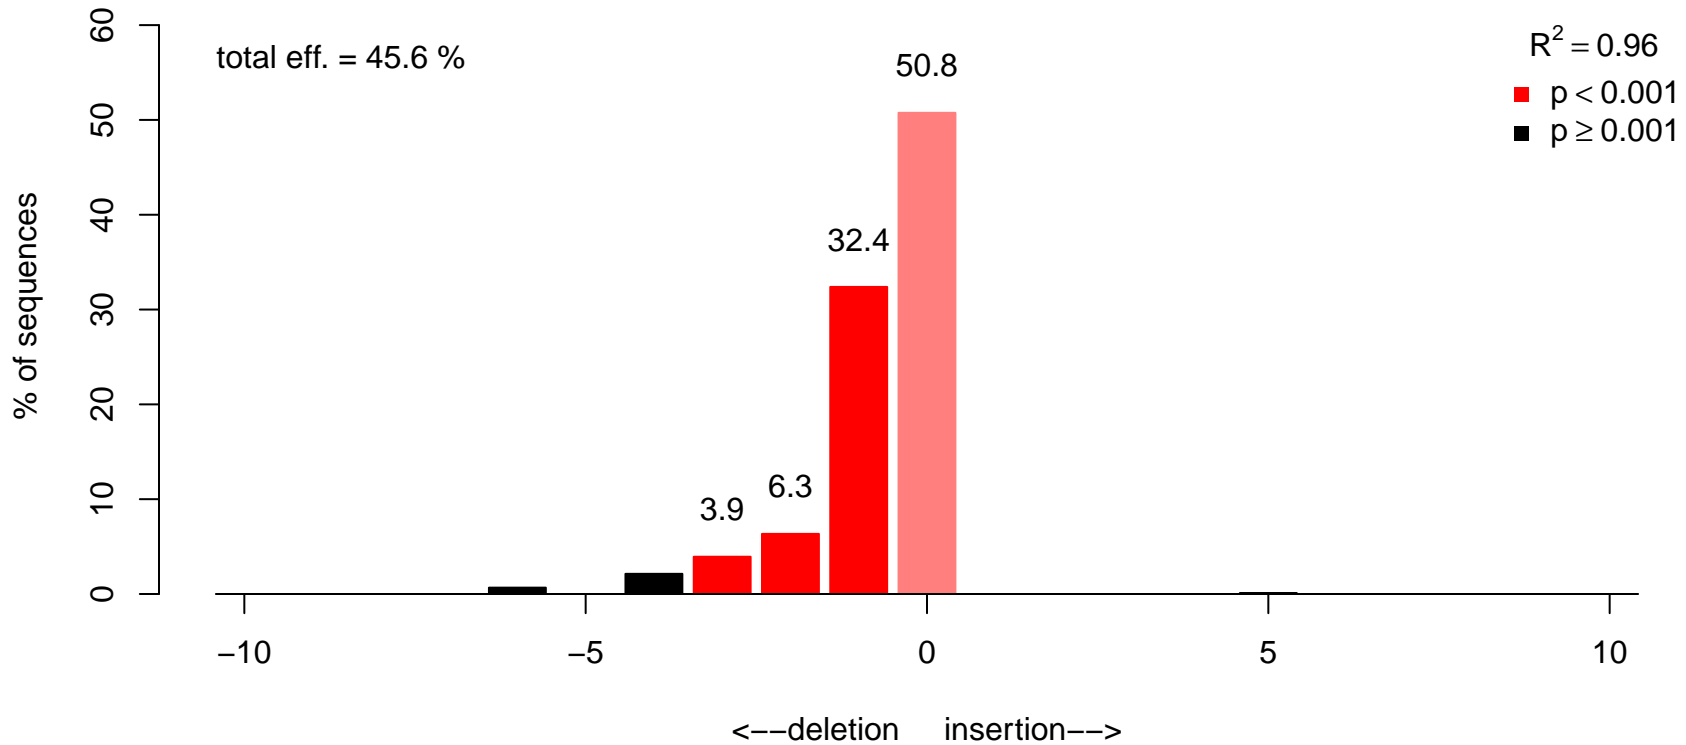

sample: WT/WT cell line, gRNA 1.3, forward  
guide: GGGTGGGACAGAACATCCCC

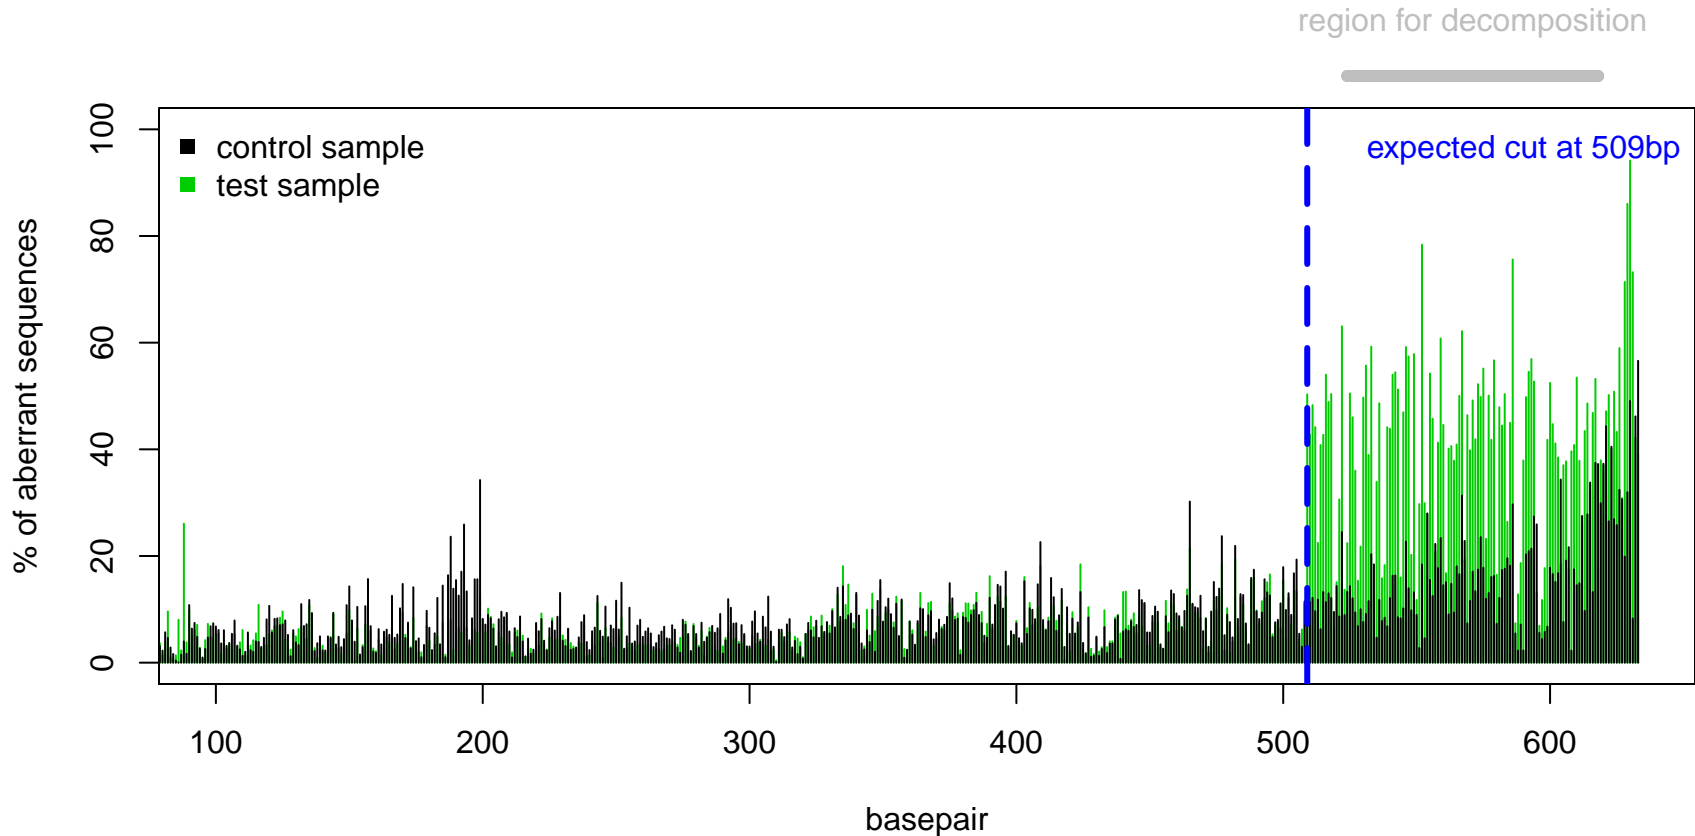

Warning: left boundary of decomposition window was adjusted 524 . It must be at least 5bp plus the maximum indel size downstream of the expected break site

Warning: right boundary of decomposition window was adjusted to 618 . It must be at least 5bp plus the maximum indel size downstream of the expected break site

sample: WT/WT cell line, gRNA 1.4, forward  
guide: TGGGACAGAACATCCCCAGG

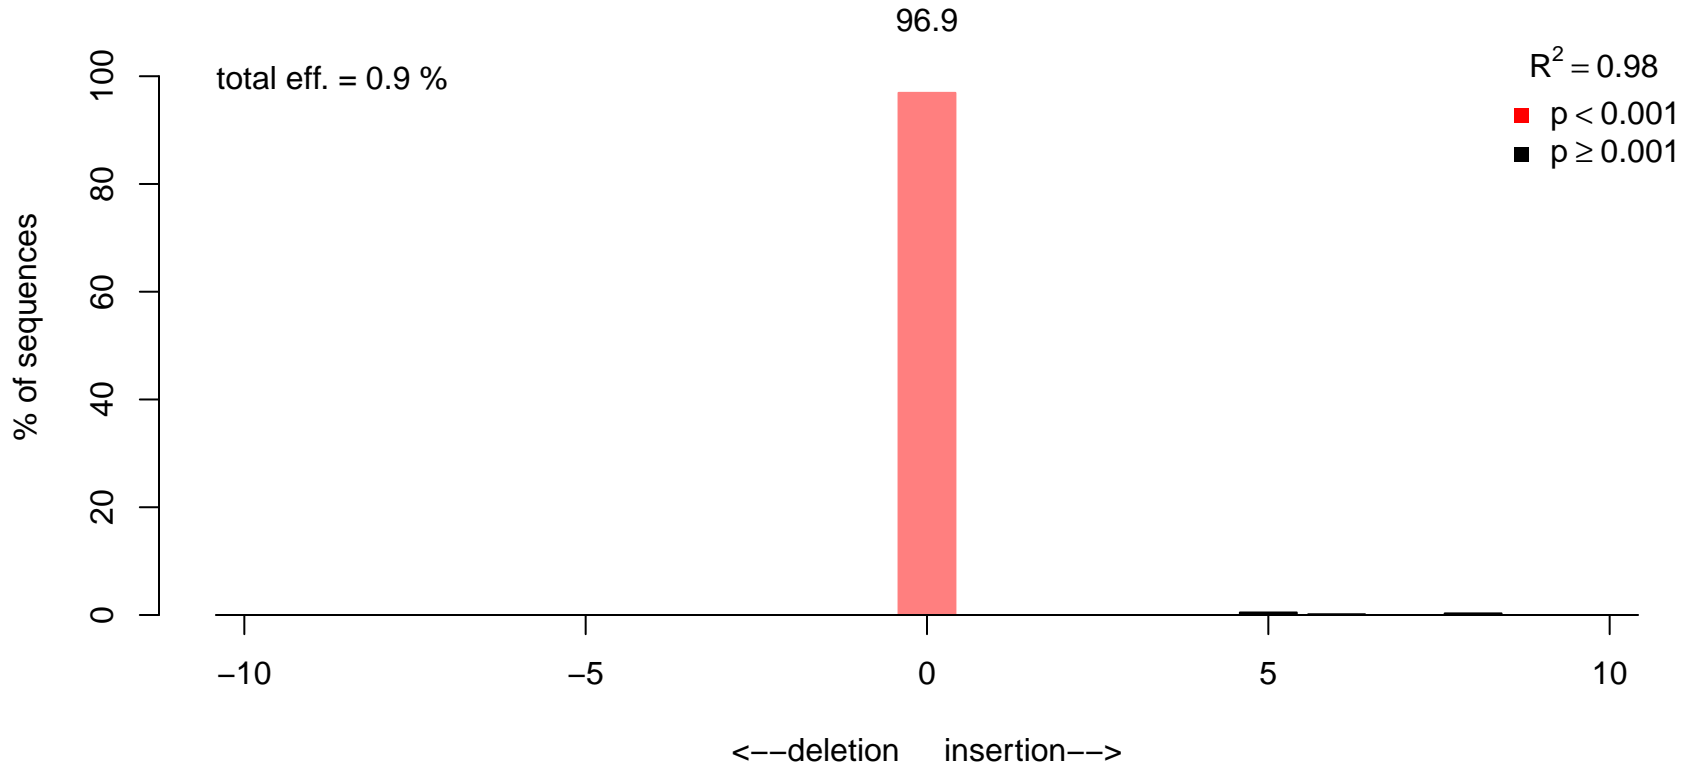

sample: WT/WT cell line, gRNA 1.4, forward  
guide: TGGGACAGAACATCCCCAGG

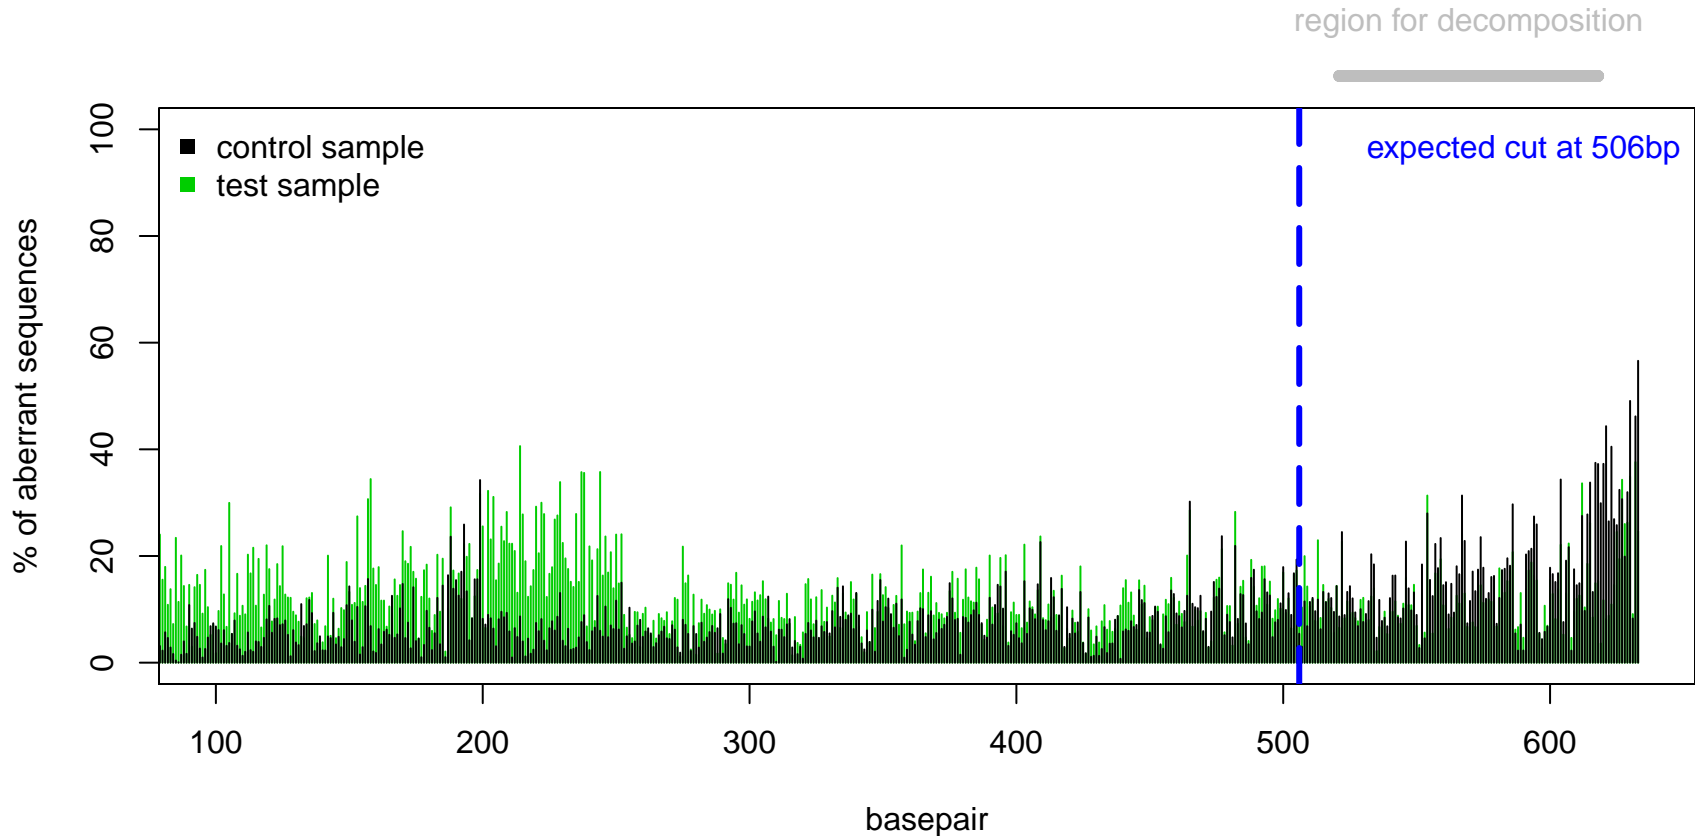

Warning: left boundary of decomposition window was adjusted 521 . It must be at least 5bp plus the maximum indel size downstream of the expected break site

Warning: right boundary of decomposition window was adjusted to 618 . It must be at least 5bp plus the maximum indel size downstream of the expected break site

sample: WT/WT cell line, gRNA 2.1, forward  
guide: TGGGACAGAACATCCCCAGG

total eff. = 11.7 %

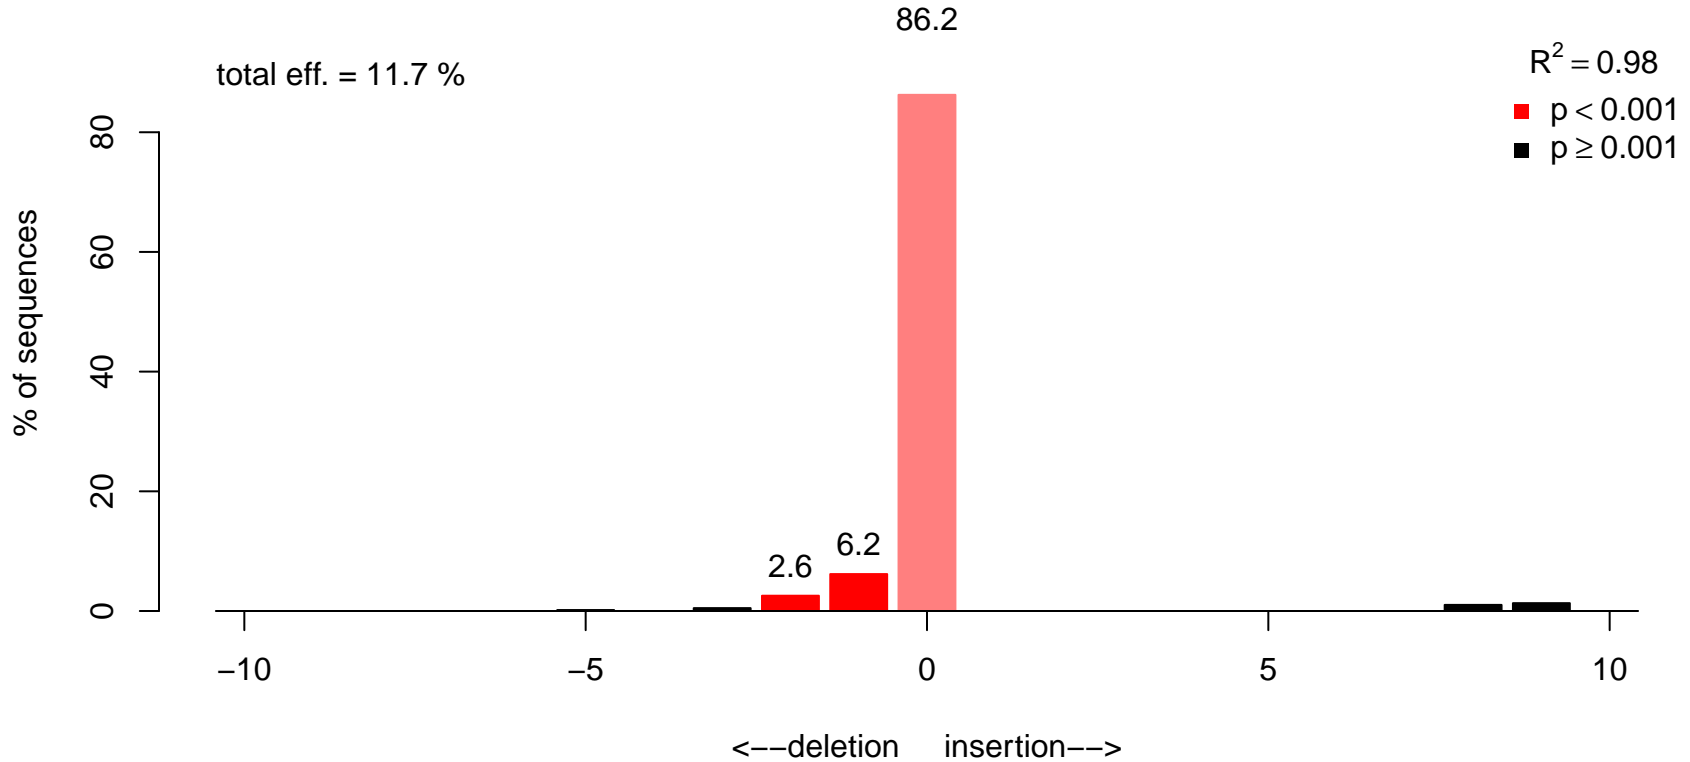



sample: WT/WT cell line, gRNA 2.1, forward  
guide: TGGGACAGAACATCCCCAGG

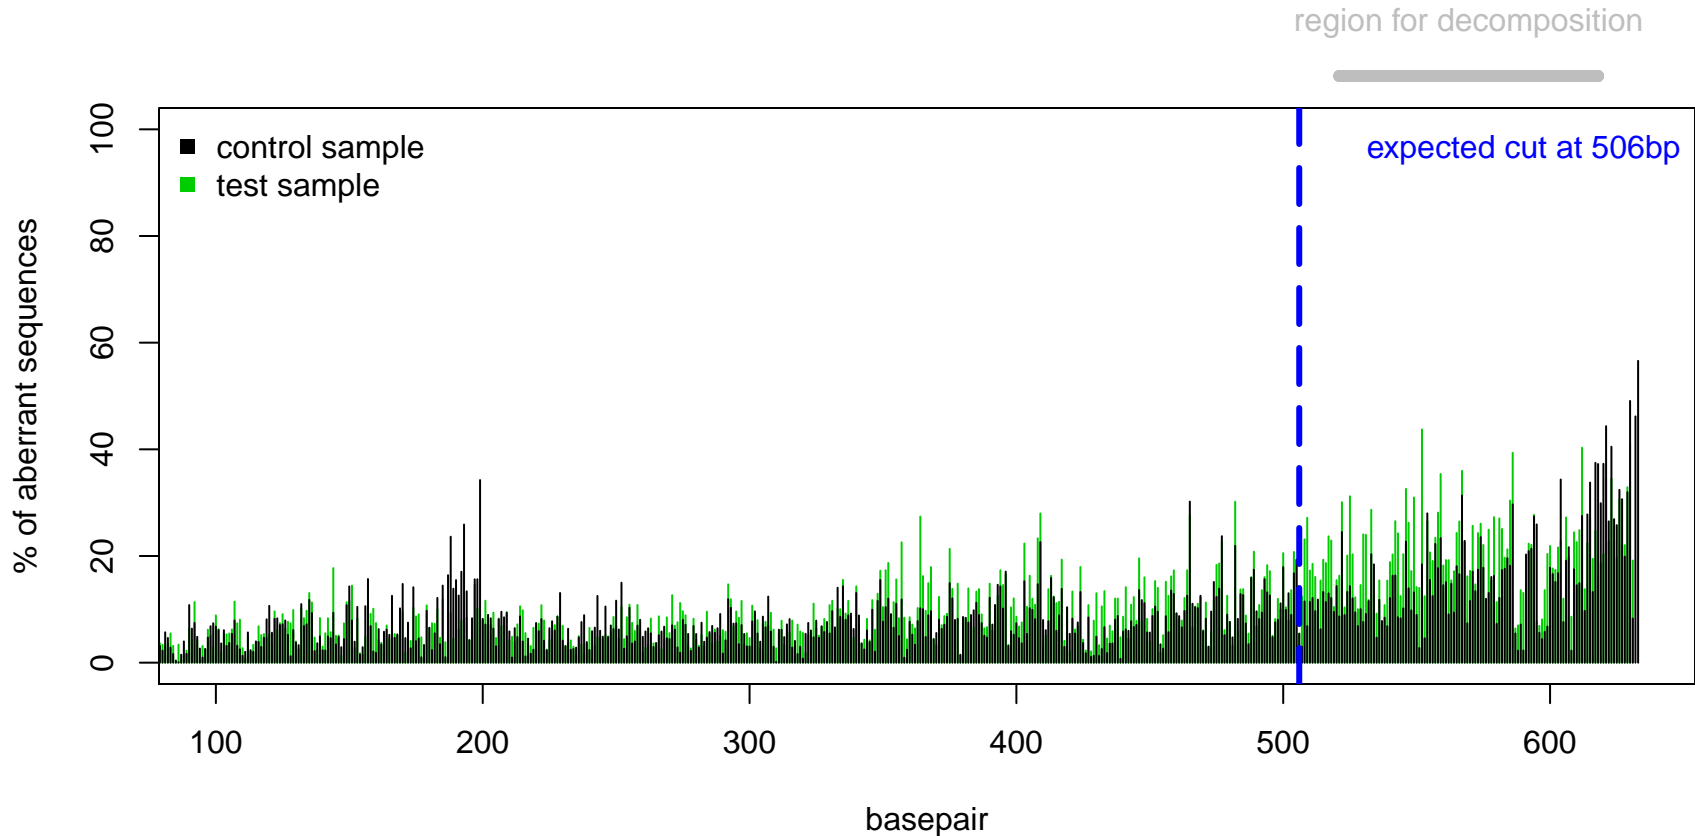

Warning: left boundary of decomposition window was adjusted 521 . It must be at least 5bp plus the maximum indel size downstream of the expected break site

Warning: right boundary of decomposition window was adjusted to 618 . It must be at least 5bp plus the maximum indel size downstream of the expected break site

sample: WT/WT cell line, gRNA 2.2, forward  
guide: TGGGACAGAACATCCCCAGG

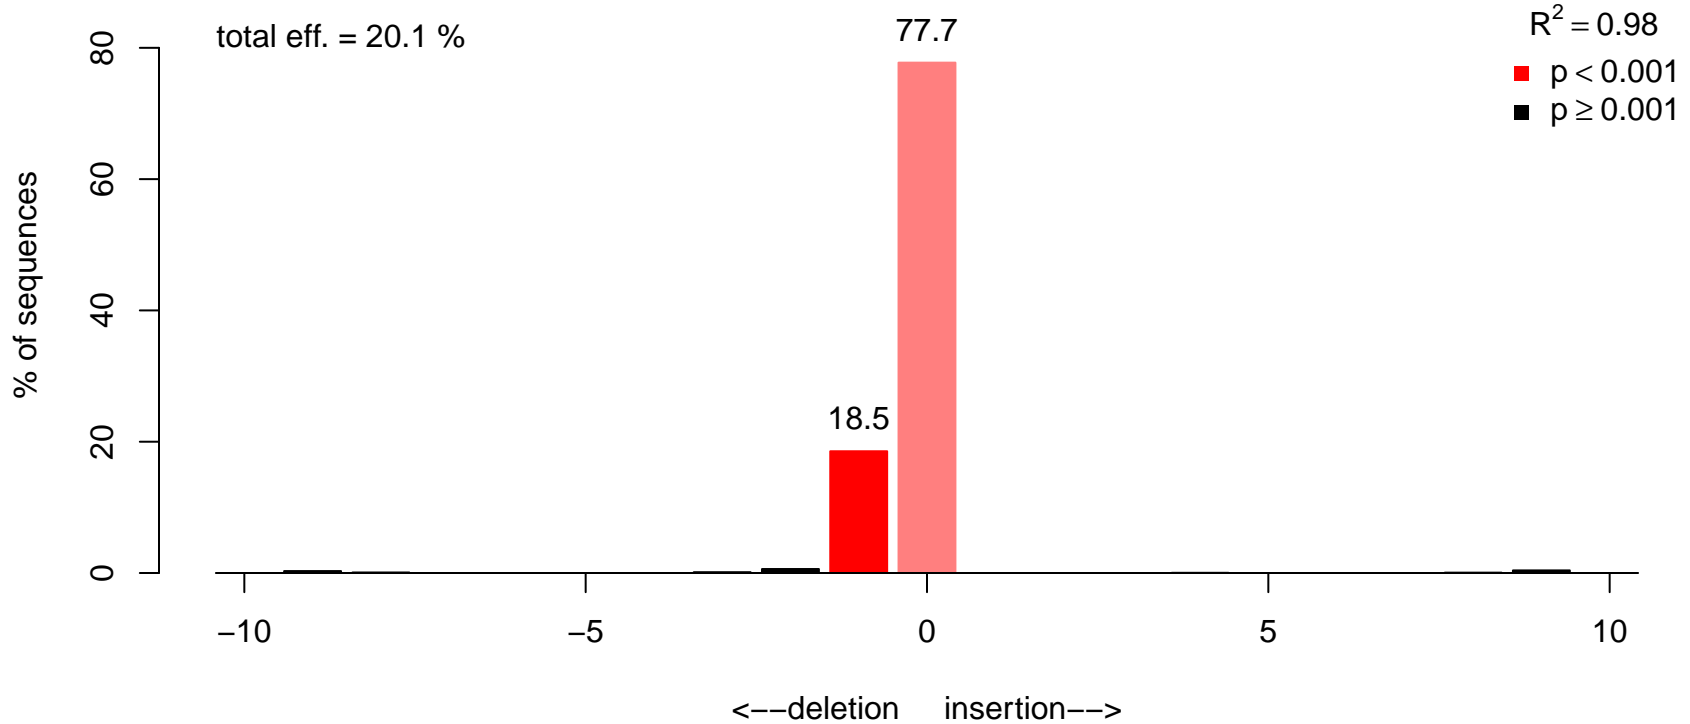

**sample: WT/WT cell line, gRNA 2.2, forward**  
**guide: TGGGACAGAACATCCCCAGG**

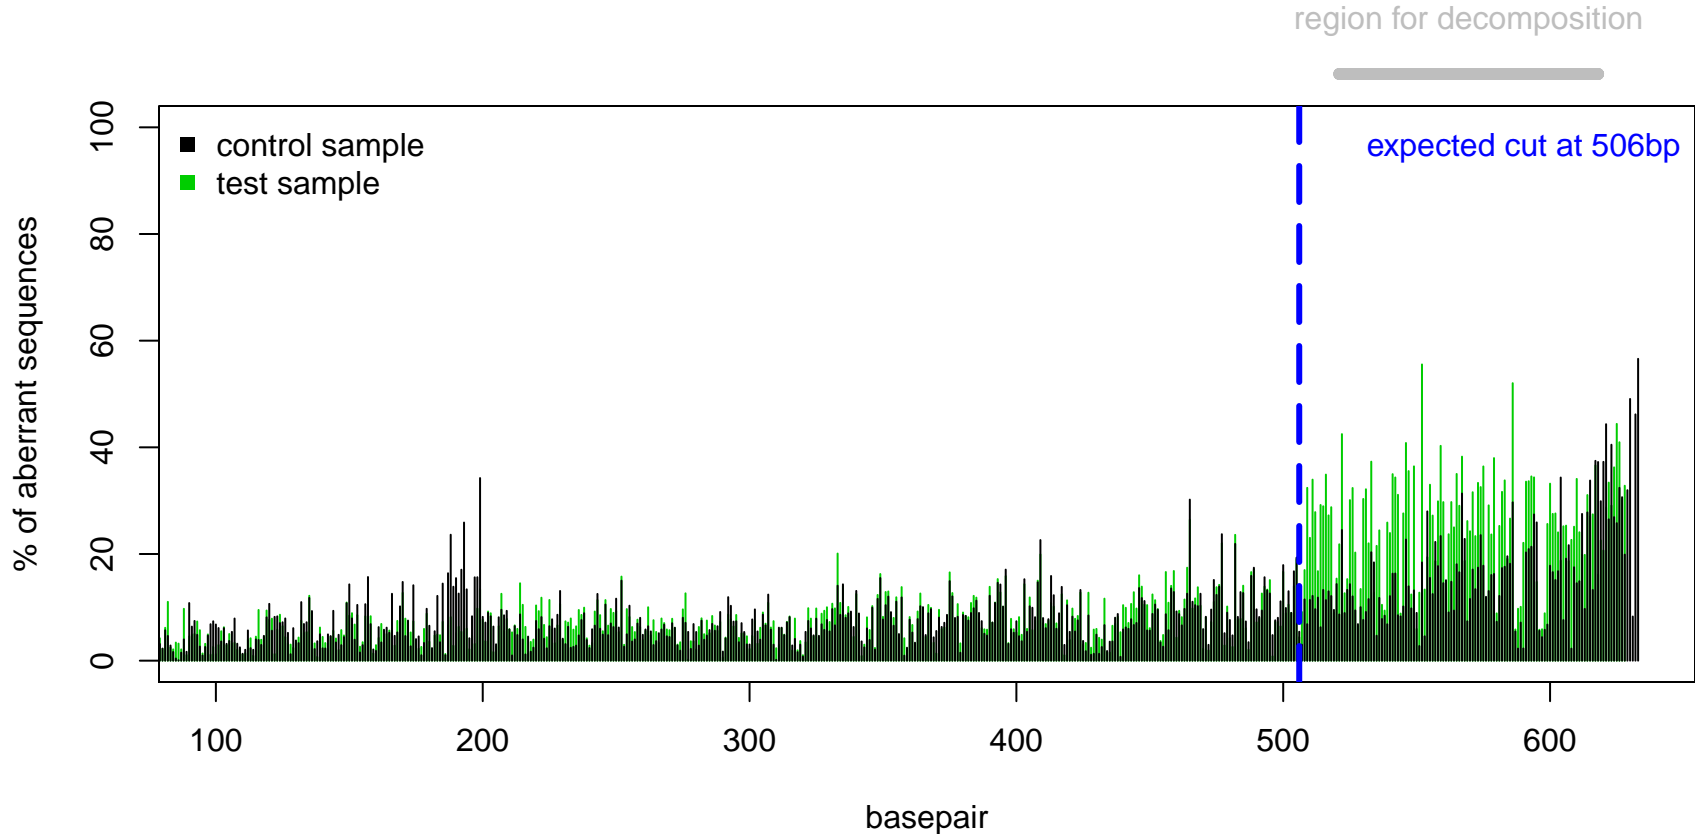

Warning: left boundary of decomposition window was adjusted 521 . It must be at least 5bp plus the maximum indel size downstream of the expected break site

Warning: right boundary of decomposition window was adjusted to 618 . It must be at least 5bp plus the maximum indel size downstream of the expected break site

sample: WT/WT cell line, gRNA 2.3, forward  
guide: TGGGACAGAACATCCCCAGG

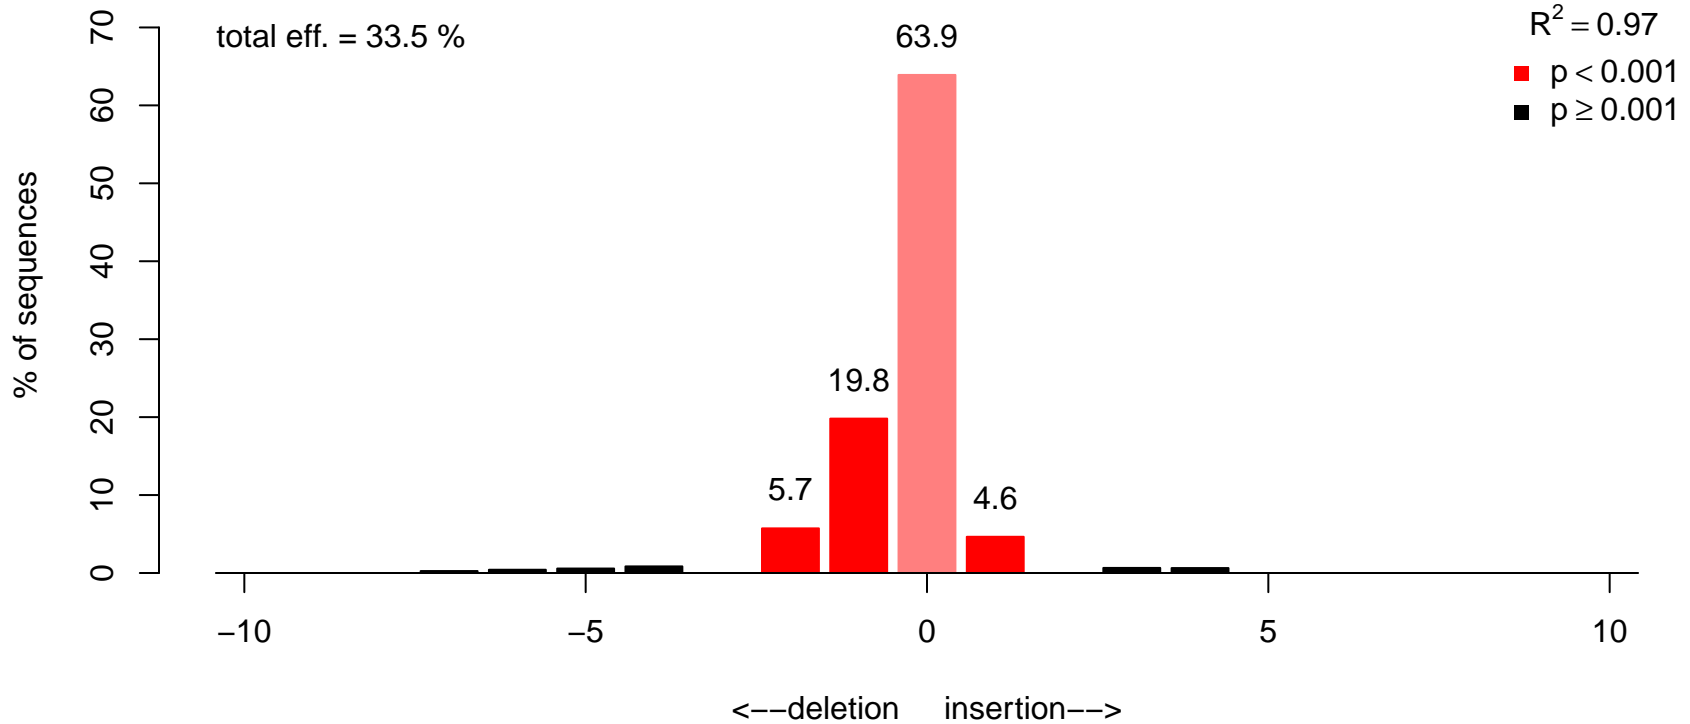

sample: WT/WT cell line, gRNA 2.3, forward  
guide: TGGGACAGAACATCCCCAGG

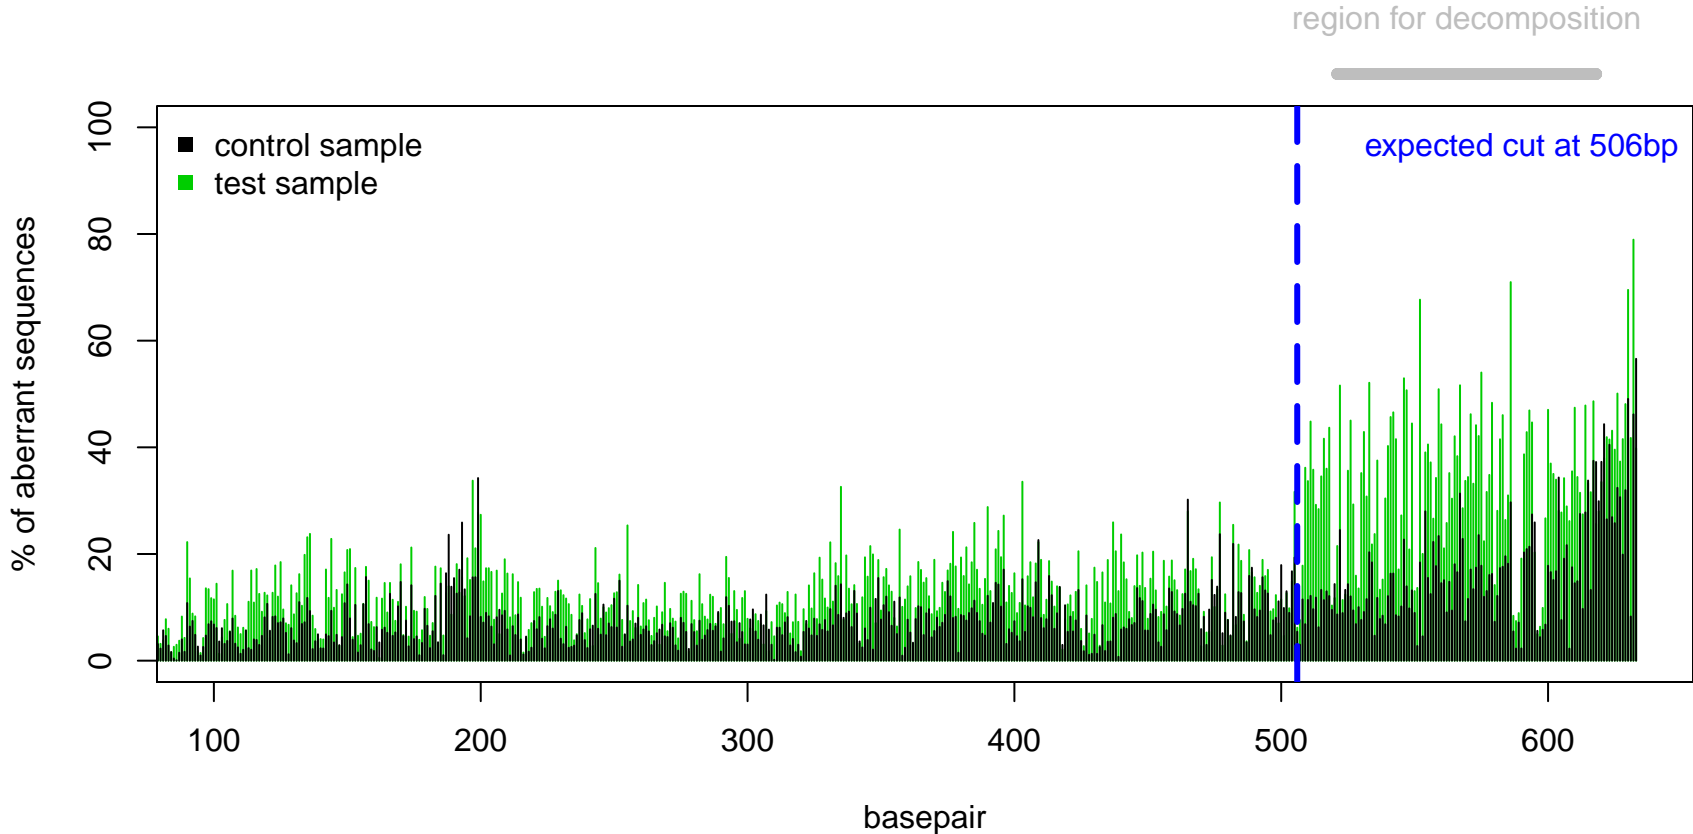

Warning: left boundary of decomposition window was adjusted 521 . It must be at least 5bp plus the maximum indel size downstream of the expected break site

Warning: right boundary of decomposition window was adjusted to 618 . It must be at least 5bp plus the maximum indel size downstream of the expected break site

sample: WT/WT cell line, gRNA 2.4, forward  
guide: TGGTAATGTCCCTCCTGGGG

total eff. = 8.2 %

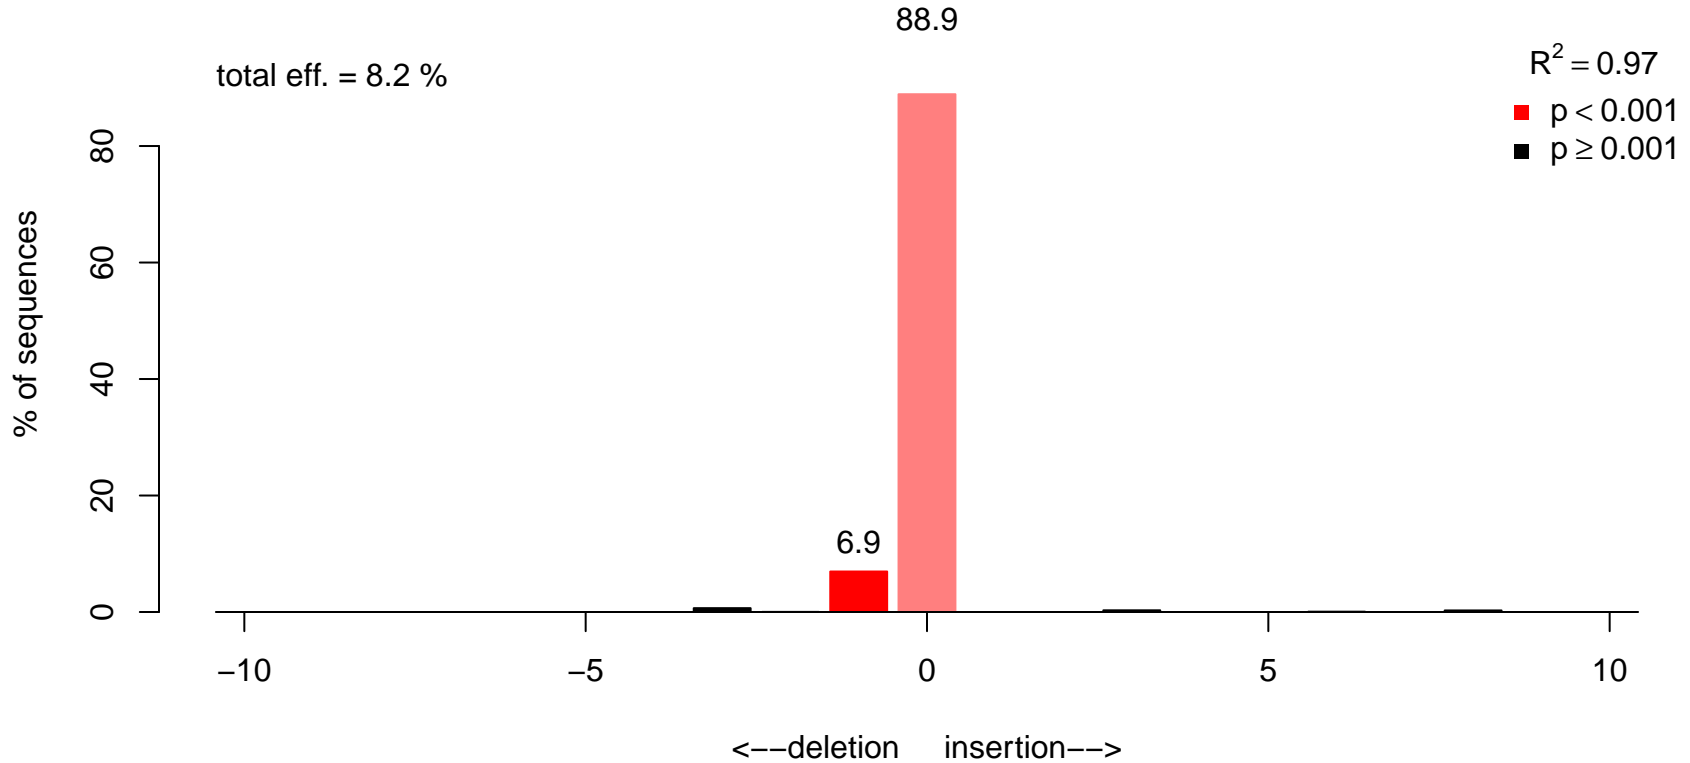

sample: WT/WT cell line, gRNA 2.4, forward  
guide: TGGTAATGTCCCTCCTGGGG

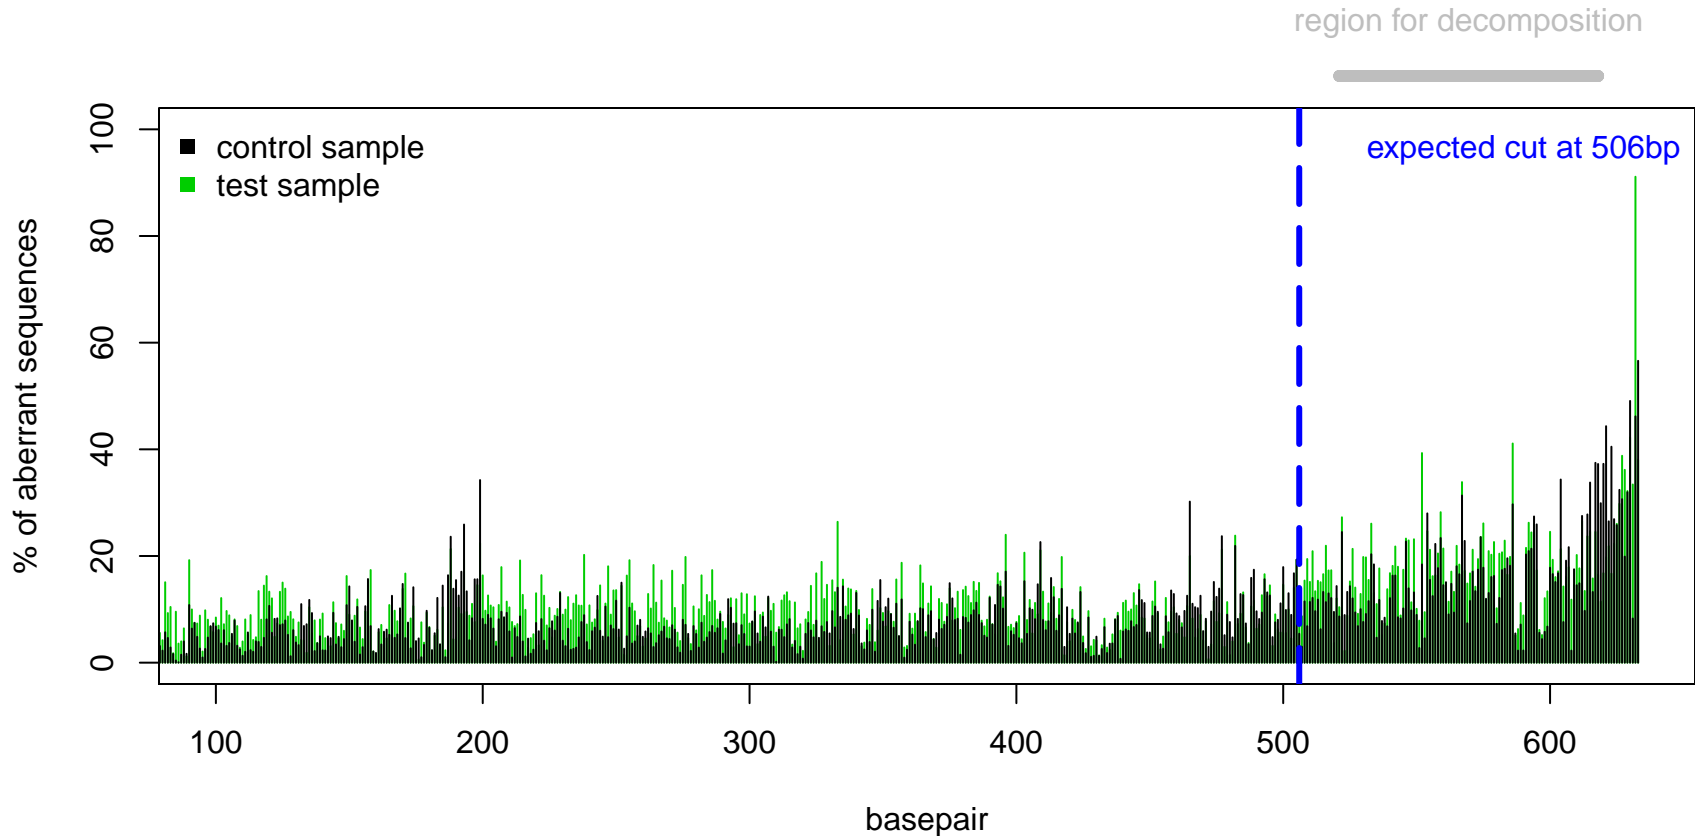

Warning: left boundary of decomposition window was adjusted 521 . It must be at least 5bp plus the maximum indel size downstream of the expected break site

Warning: right boundary of decomposition window was adjusted to 618 . It must be at least 5bp plus the maximum indel size downstream of the expected break site

sample: WT/WT cell line, gRNA 3.1, forward  
guide: TGGTAATGTCCCTCCTGGGG

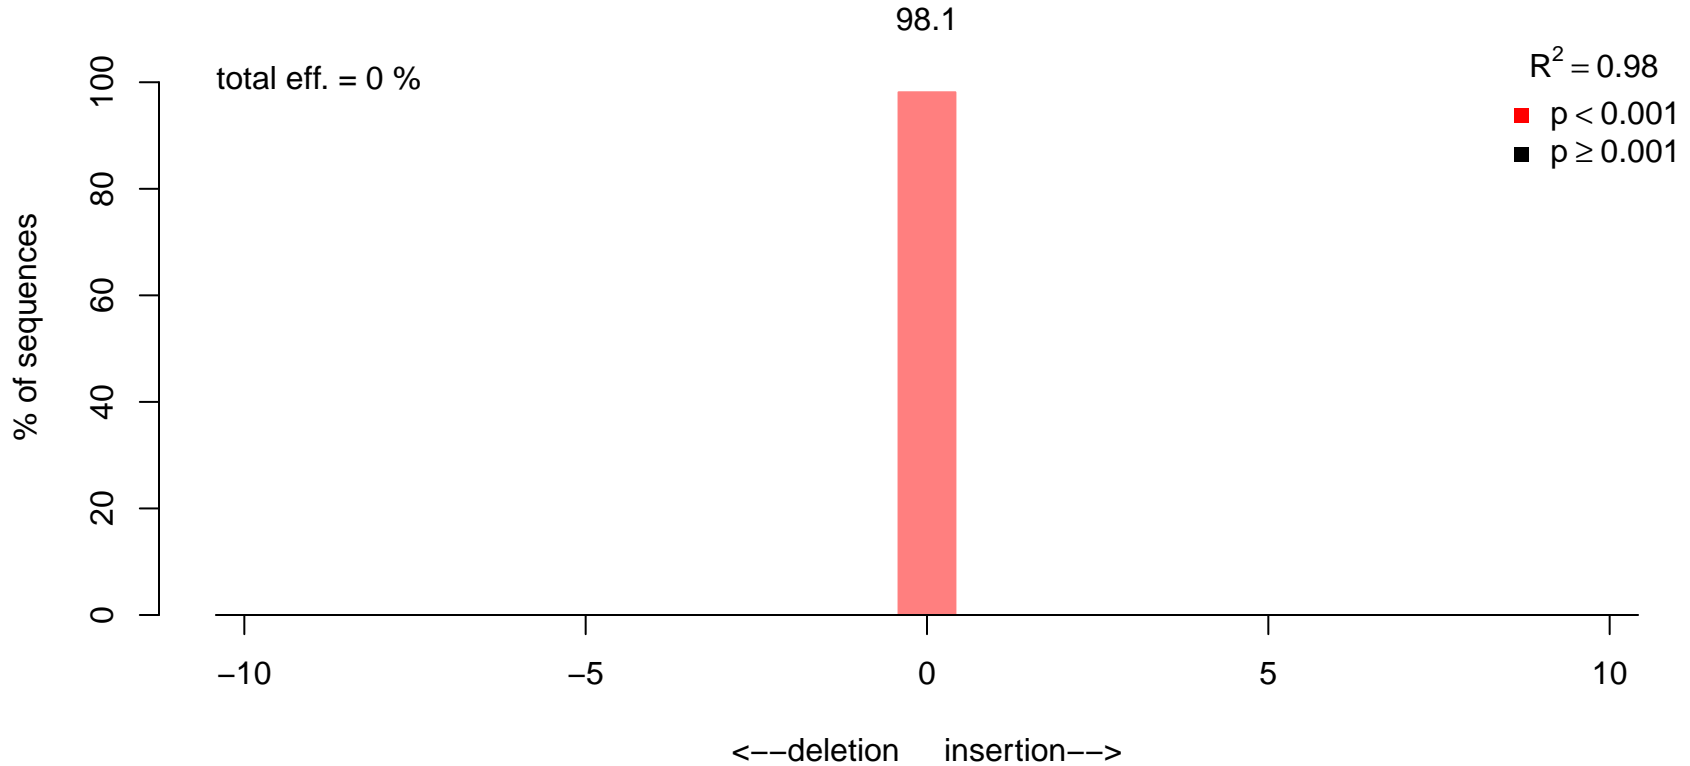



sample: WT/WT cell line, gRNA 3.1, forward  
guide: TGGTAATGTCCCTCCTGGGG

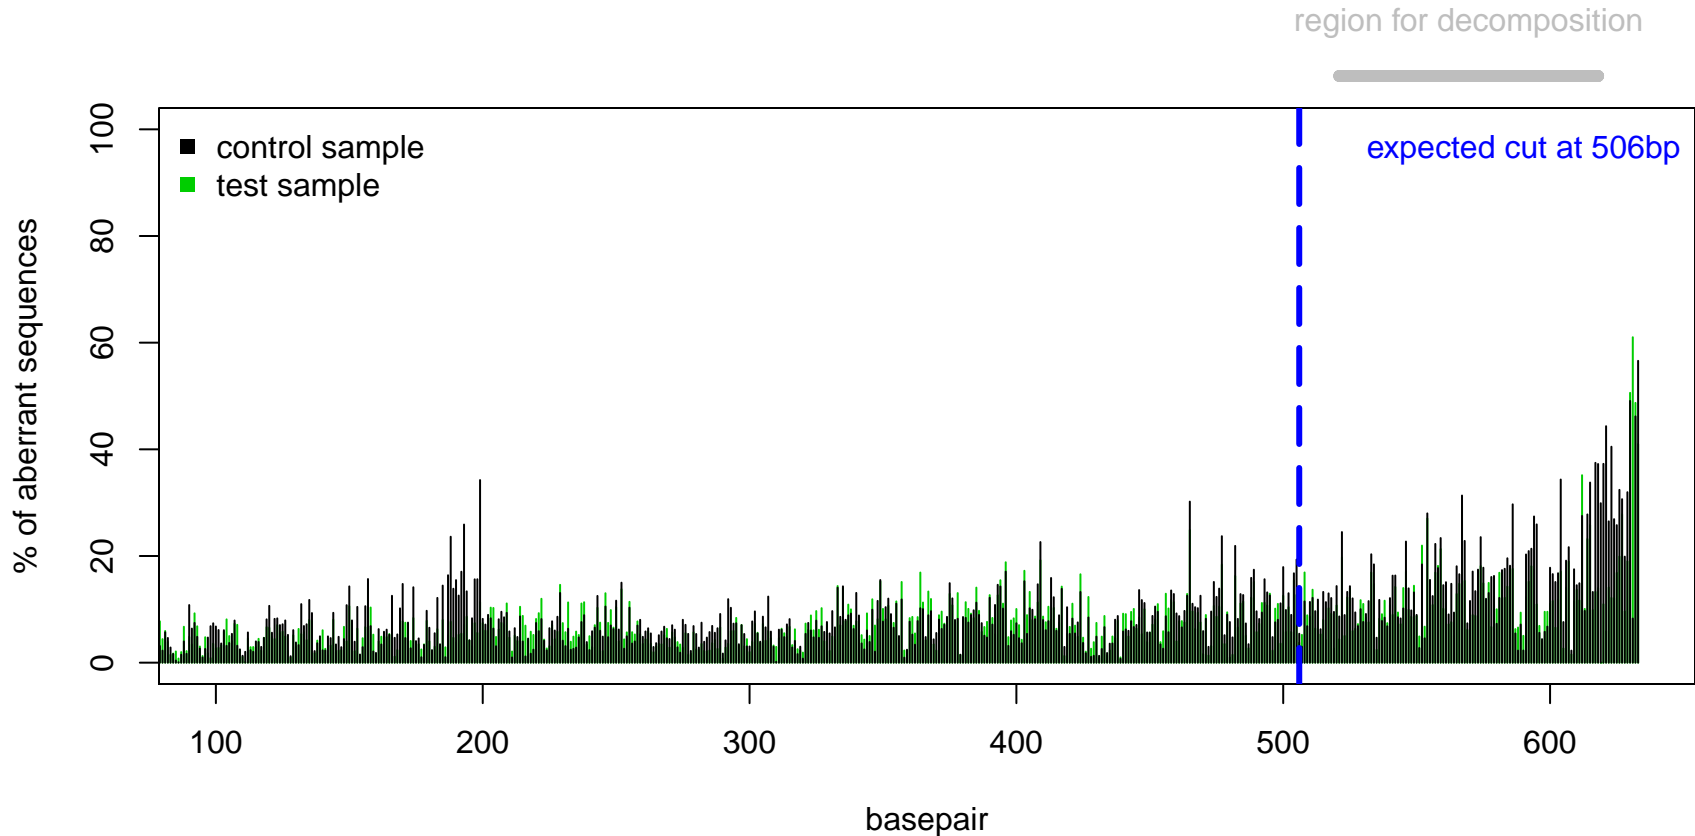

Warning: left boundary of decomposition window was adjusted 521 . It must be at least 5bp plus the maximum indel size downstream of the expected break site

Warning: right boundary of decomposition window was adjusted to 618 . It must be at least 5bp plus the maximum indel size downstream of the expected break site

sample: WT/WT cell line, gRNA 3.2, forward  
guide: TGGTAATGTCCCTCCTGGGG

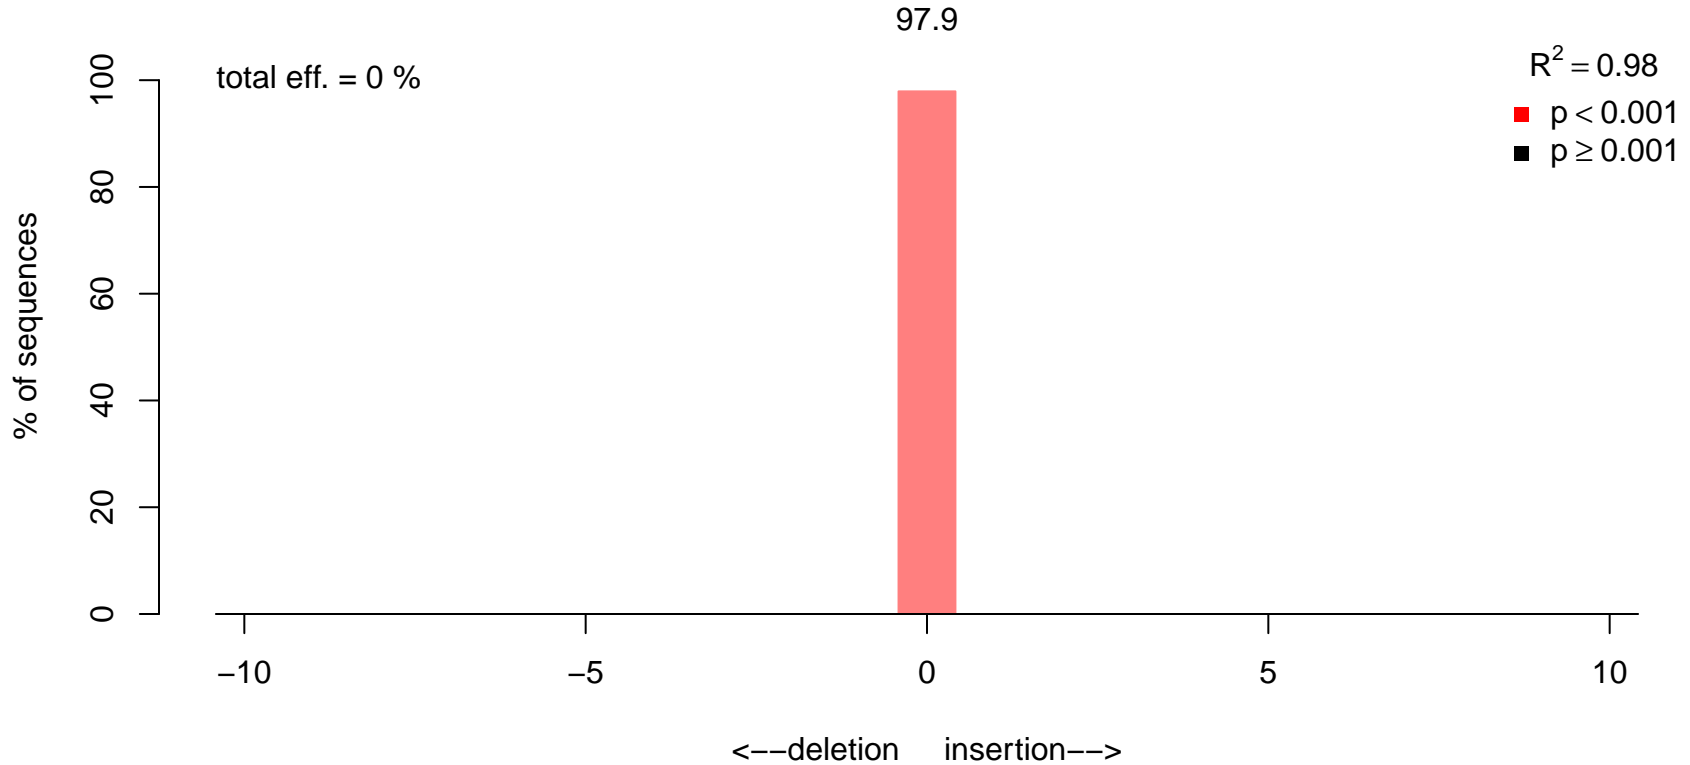

sample: WT/WT cell line, gRNA 3.2, forward  
guide: TGGTAATGTCCCTCCTGGGG

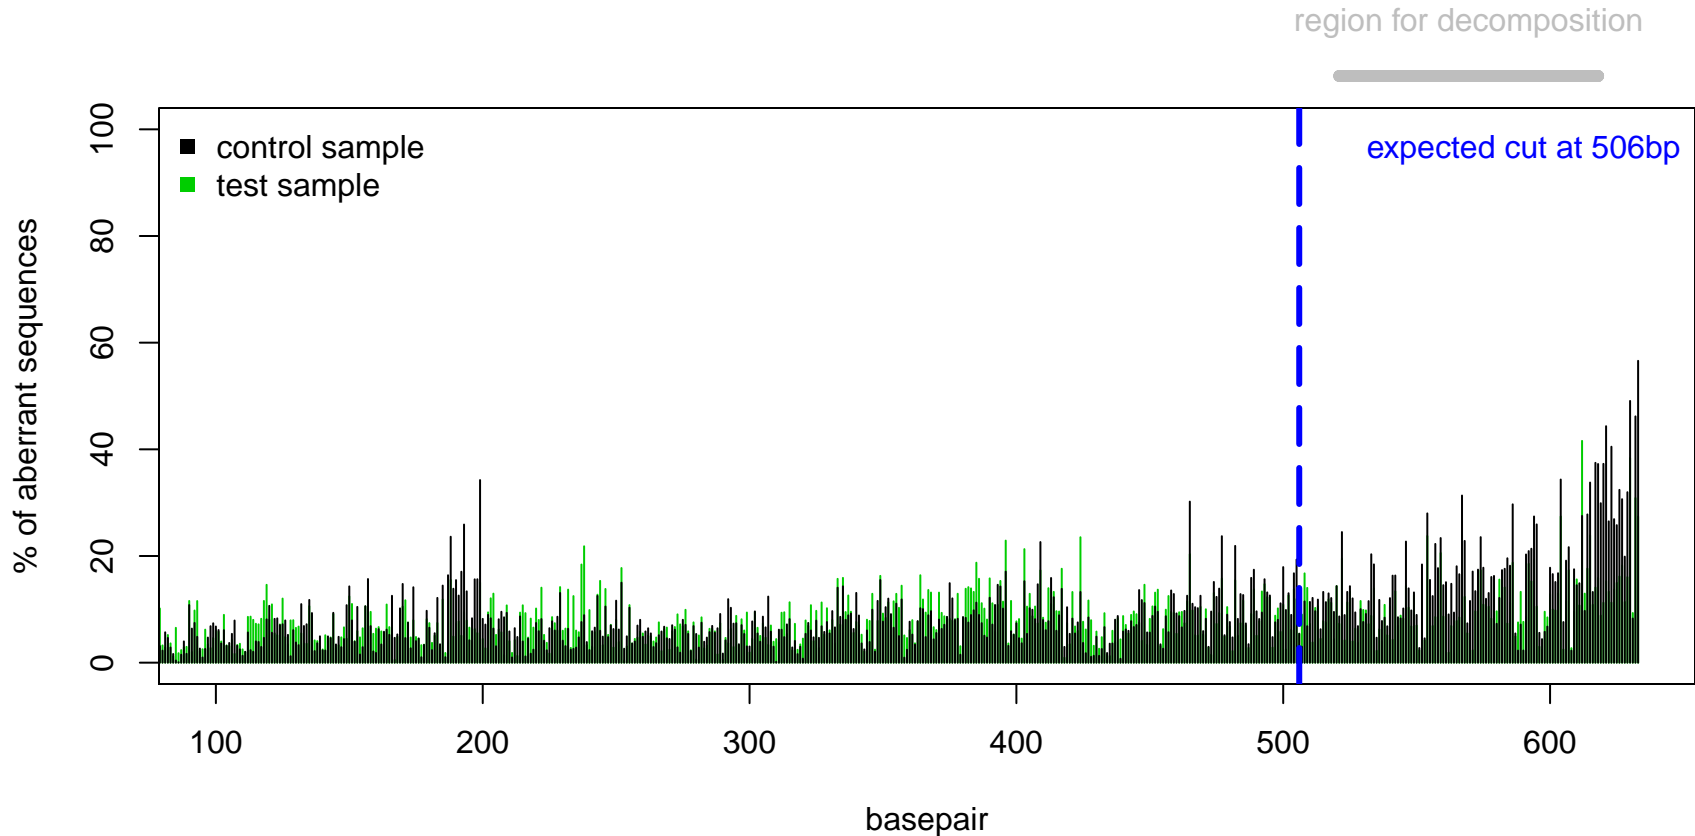

Warning: left boundary of decomposition window was adjusted 521 . It must be at least 5bp plus the maximum indel size downstream of the expected break site

Warning: right boundary of decomposition window was adjusted to 618 . It must be at least 5bp plus the maximum indel size downstream of the expected break site

sample: WT/WT cell line, gRNA 3,3, forward  
guide: GGGTGGGACAGAACATCCCC

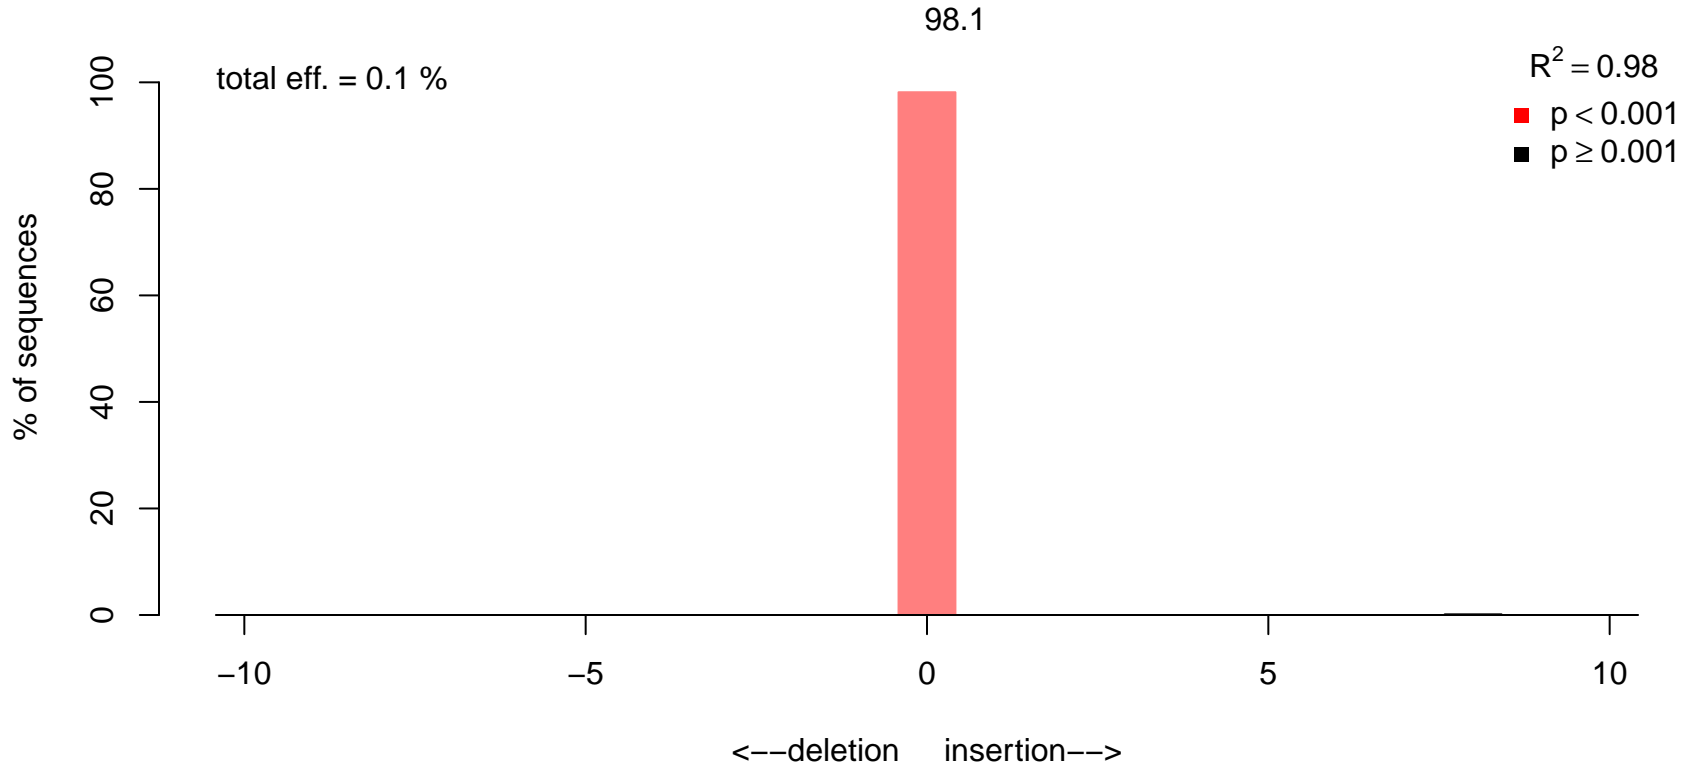

sample: WT/WT cell line, gRNA 3.3, forward  
guide: GGGTGGGACAGAACATCCCC

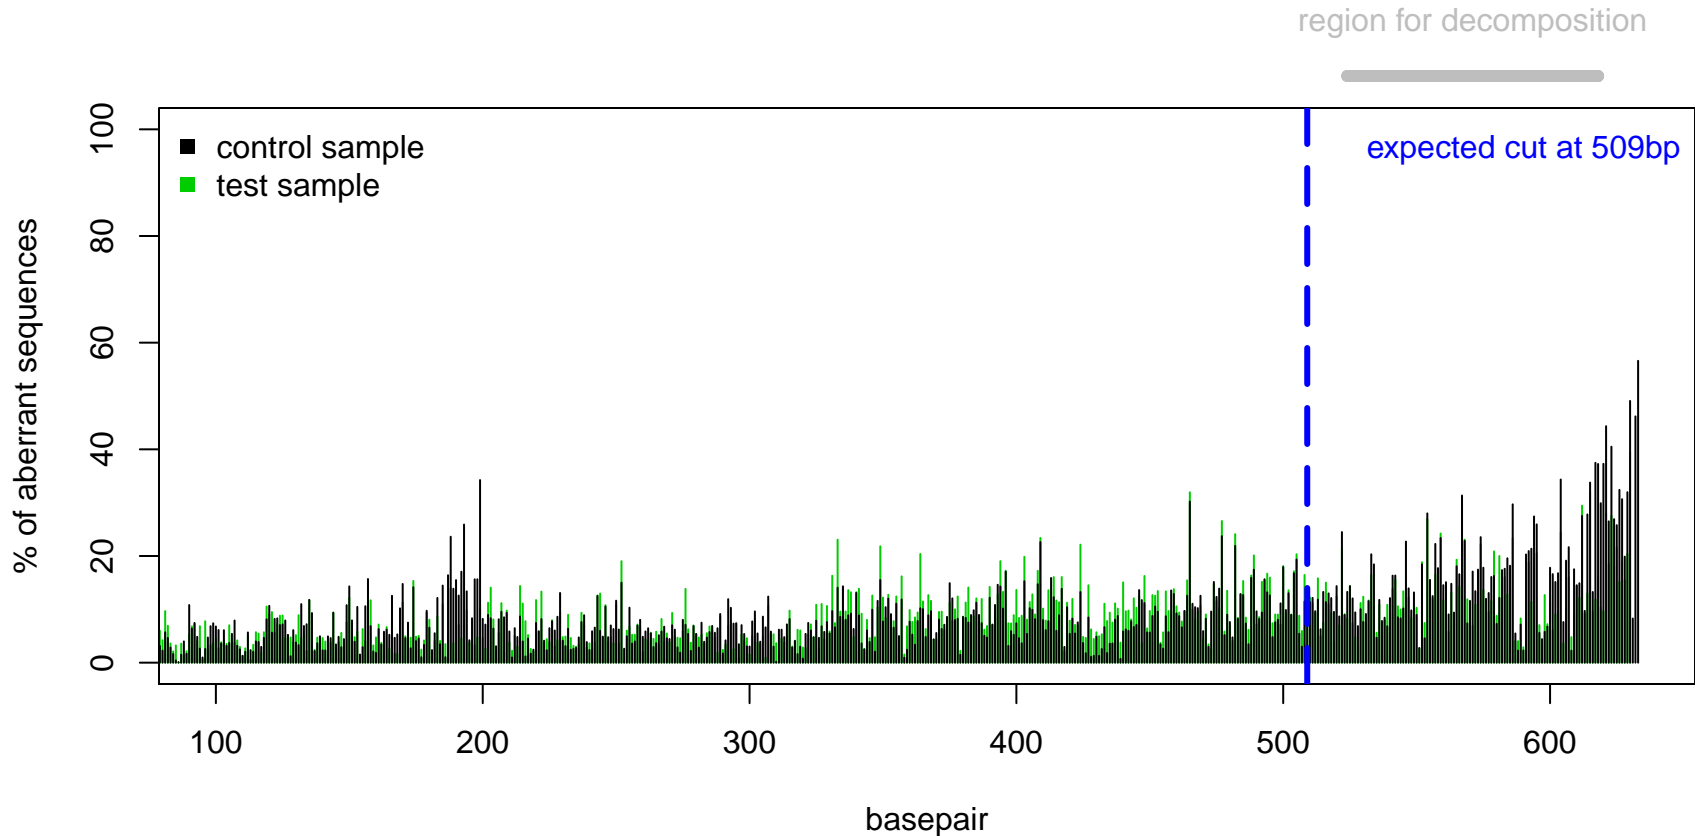

Warning: left boundary of decomposition window was adjusted 524 . It must be at least 5bp plus the maximum indel size downstream of the expected break site

Warning: right boundary of decomposition window was adjusted to 618 . It must be at least 5bp plus the maximum indel size downstream of the expected break site

sample: Bth/WT cell line, gRNA WT, reverse  
guide: GGGTGGGACAGAACTTCCCC

total eff. = 87.8 %

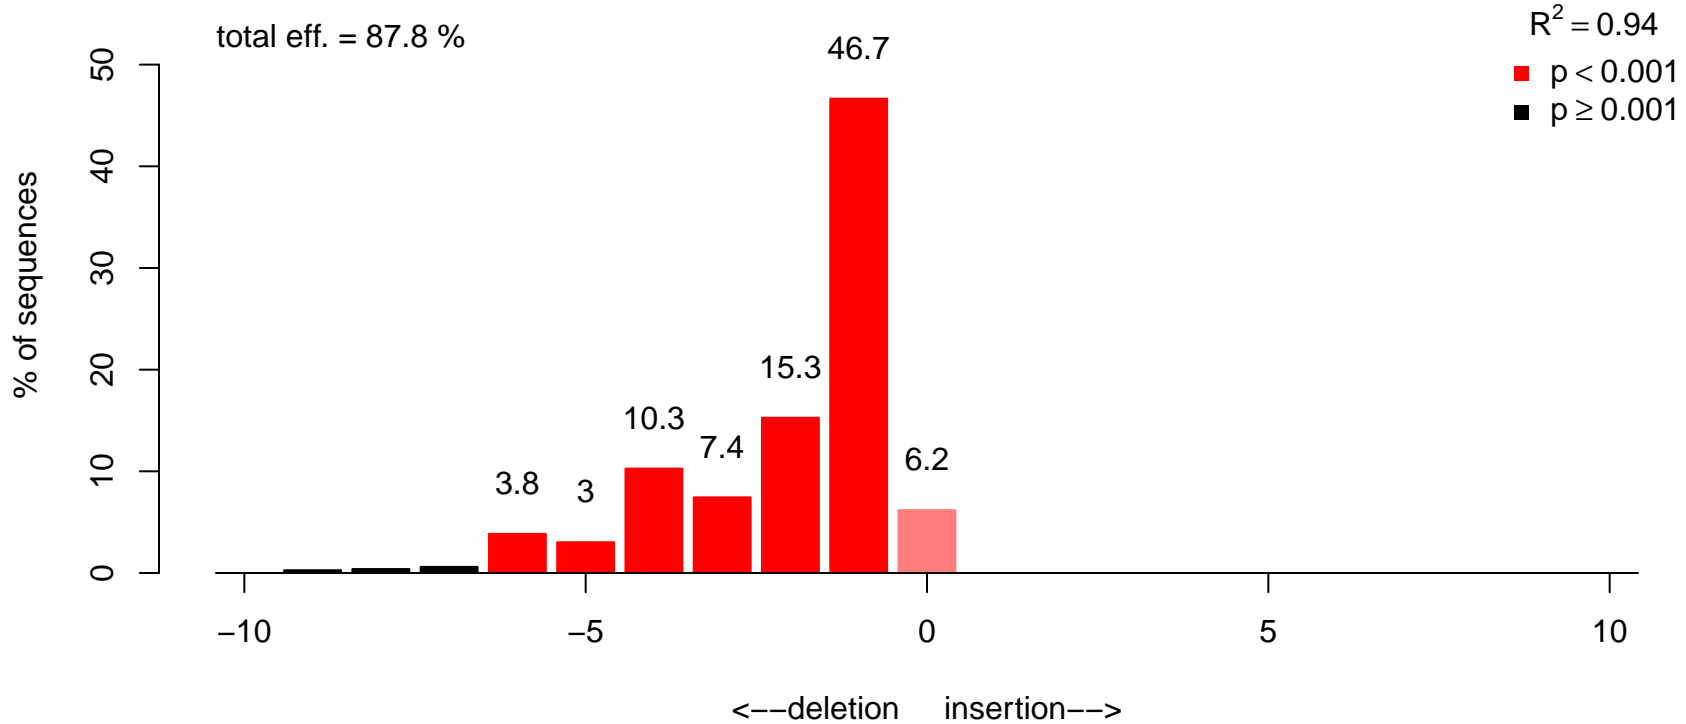

sample: Bth/WT cell line, gRNA WT, reverse  
guide: GGGTGGGACAGAACTTCCCC

region for decomposition

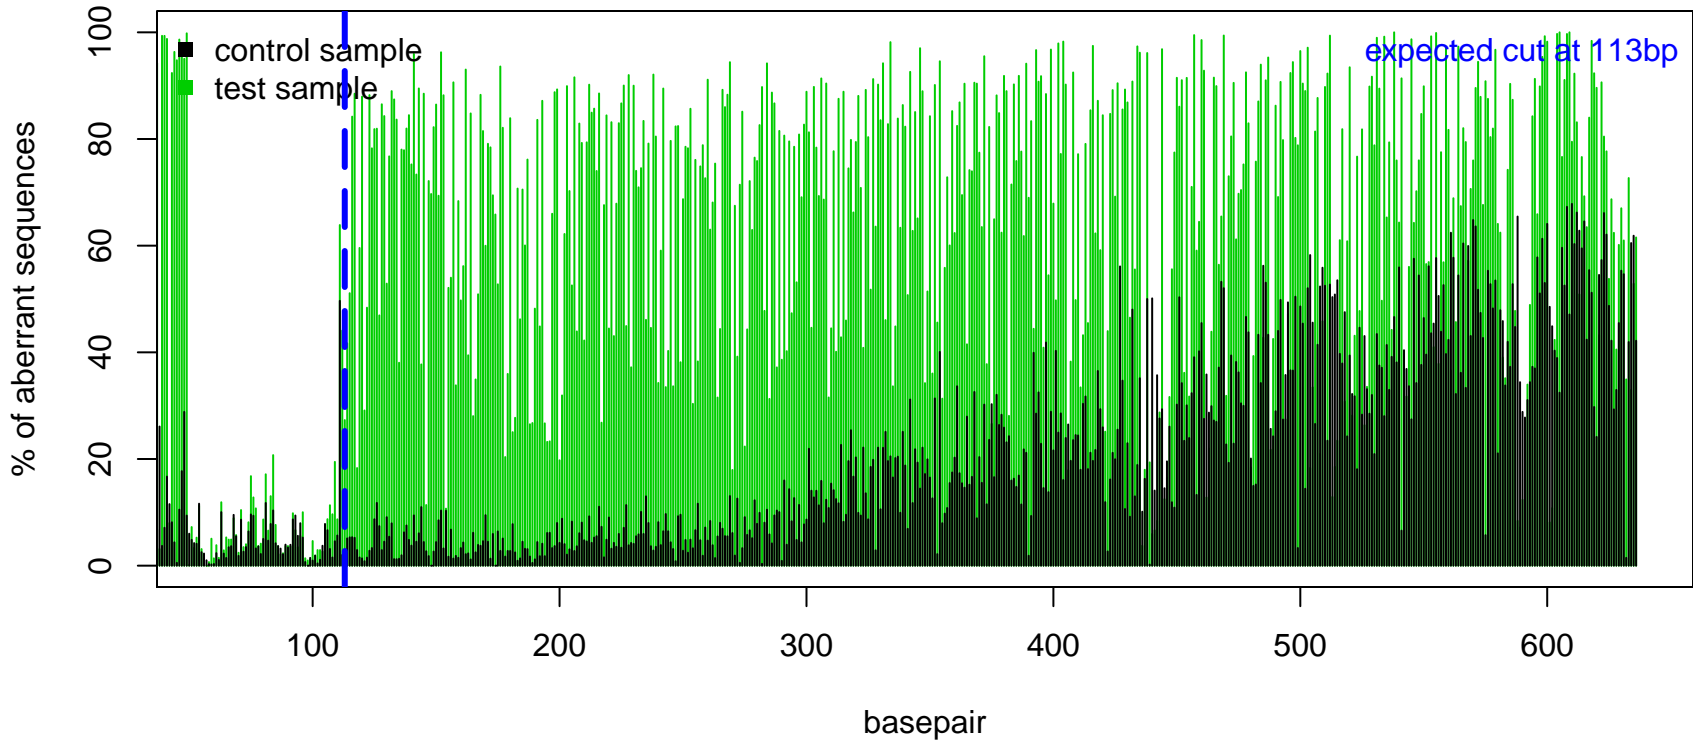

Warning: left boundary of decomposition window was adjusted 128 . It must be at least 5bp plus the maximum indel size downstream of the expected break site

sample: Bth/WT cell line, gRNA 1.1, reverse  
guide: GGGTGGGACAGAACTTCCCC

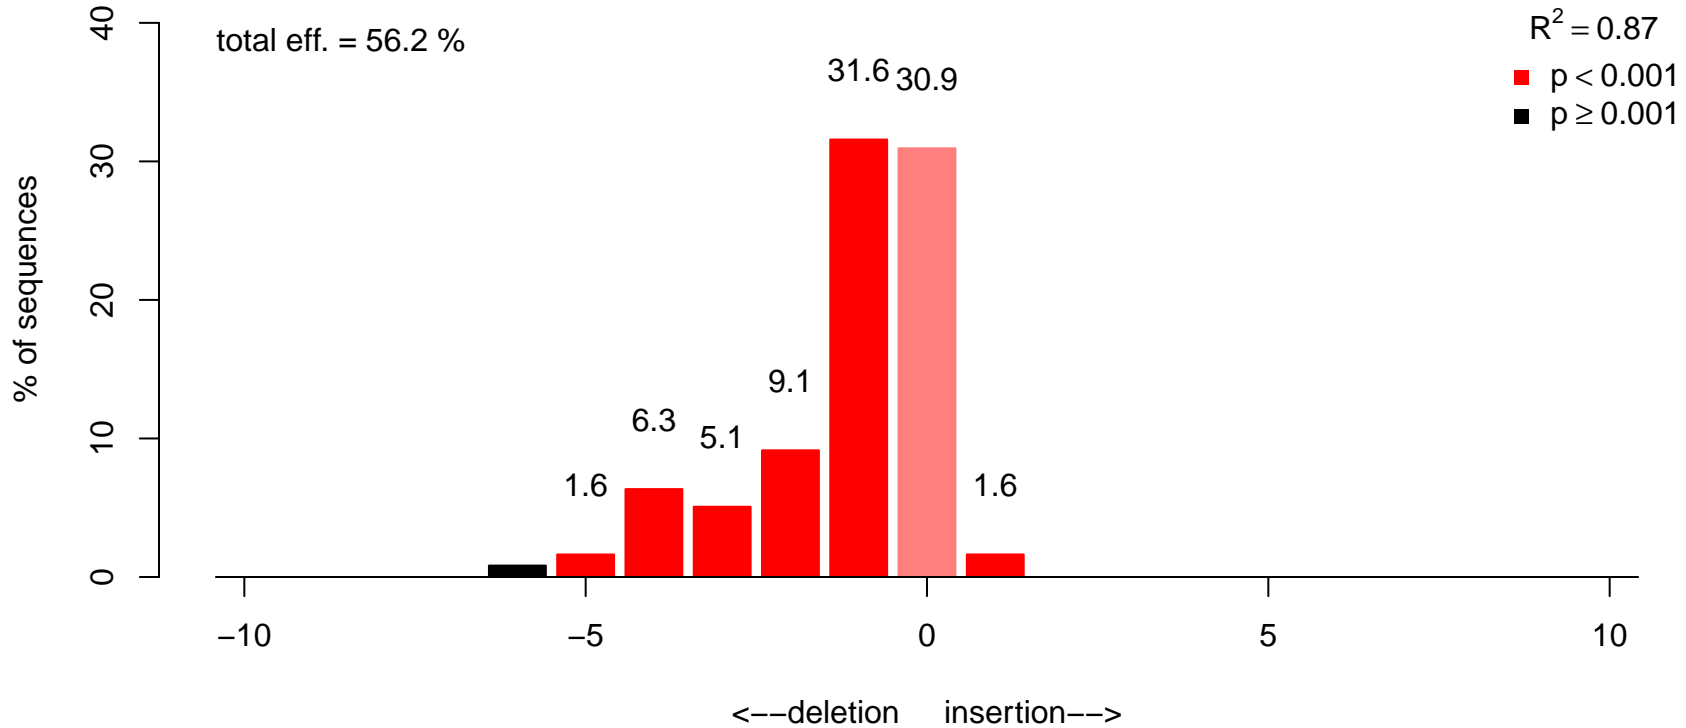



sample: Bth/WT cell line, gRNA 1.1, reverse  
guide: GGGTGGGACAGAACTTCCCC

region for decomposition

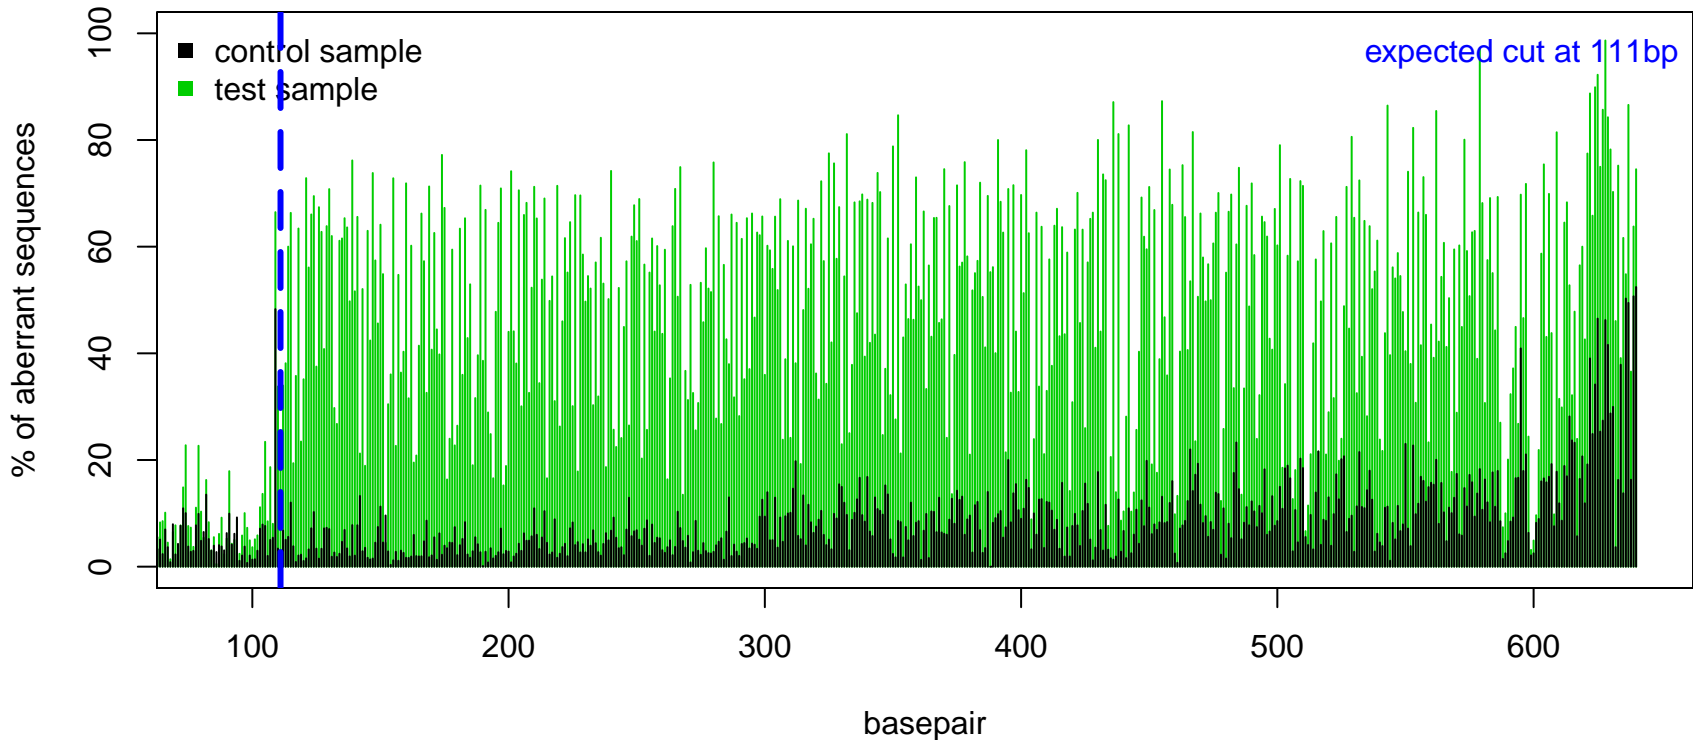

Warning: left boundary of decomposition window was adjusted 126 . It must be at least 5bp plus the maximum indel size downstream of the expected break site

Warning: right boundary of decomposition window was adjusted to 625 . It must be at least 5bp plus the maximum indel size downstream of the expected break site

sample: Bth/WT cell line, gRNA 1.2, reverse  
guide: GGGTGGGACAGAACTTCCCC

total eff. = 66.3 %

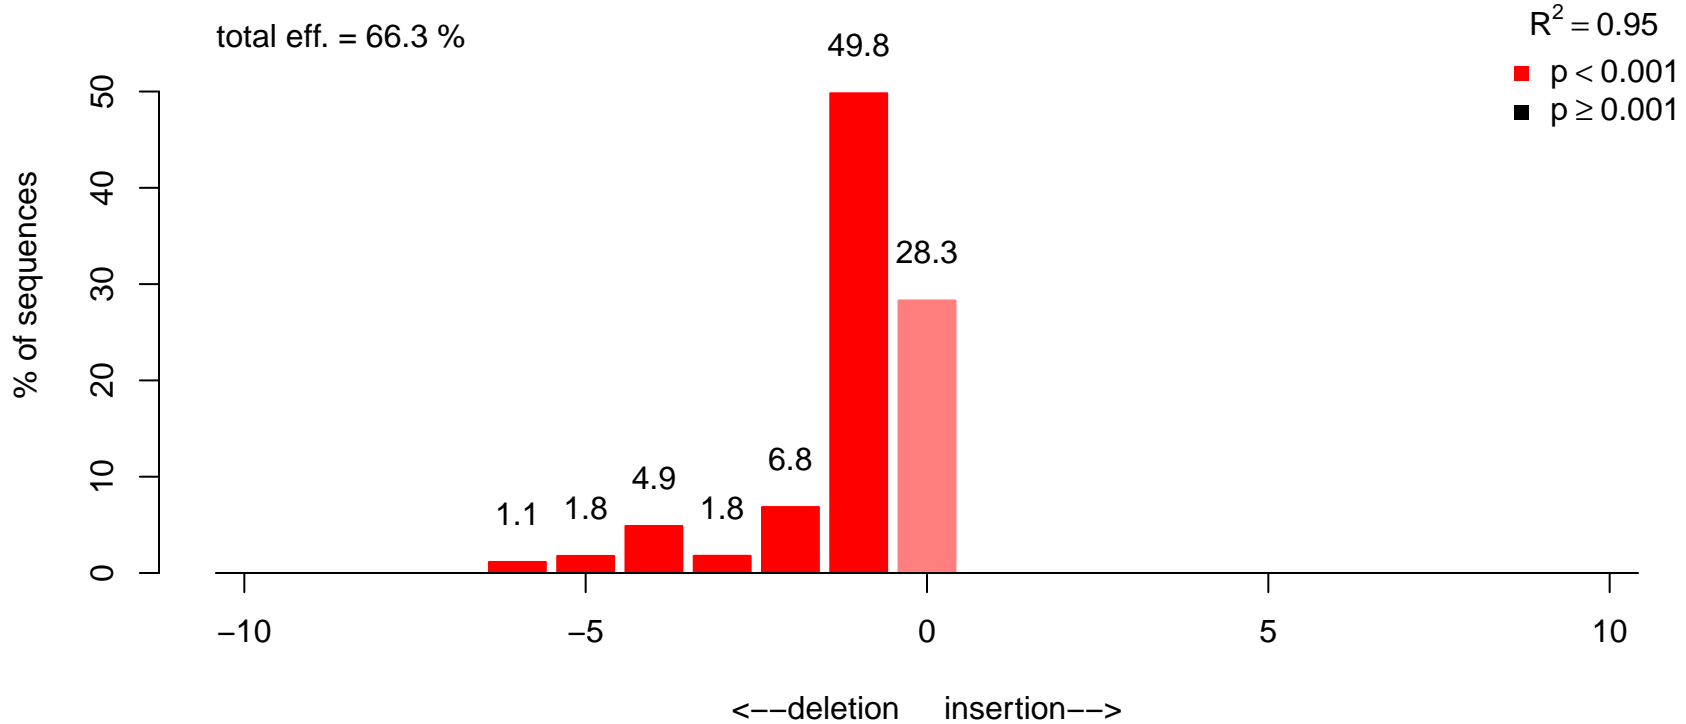

sample: Bth/WT cell line, gRNA 1.2, reverse  
guide: GGGTGGGACAGAACTTCCCC

region for decomposition

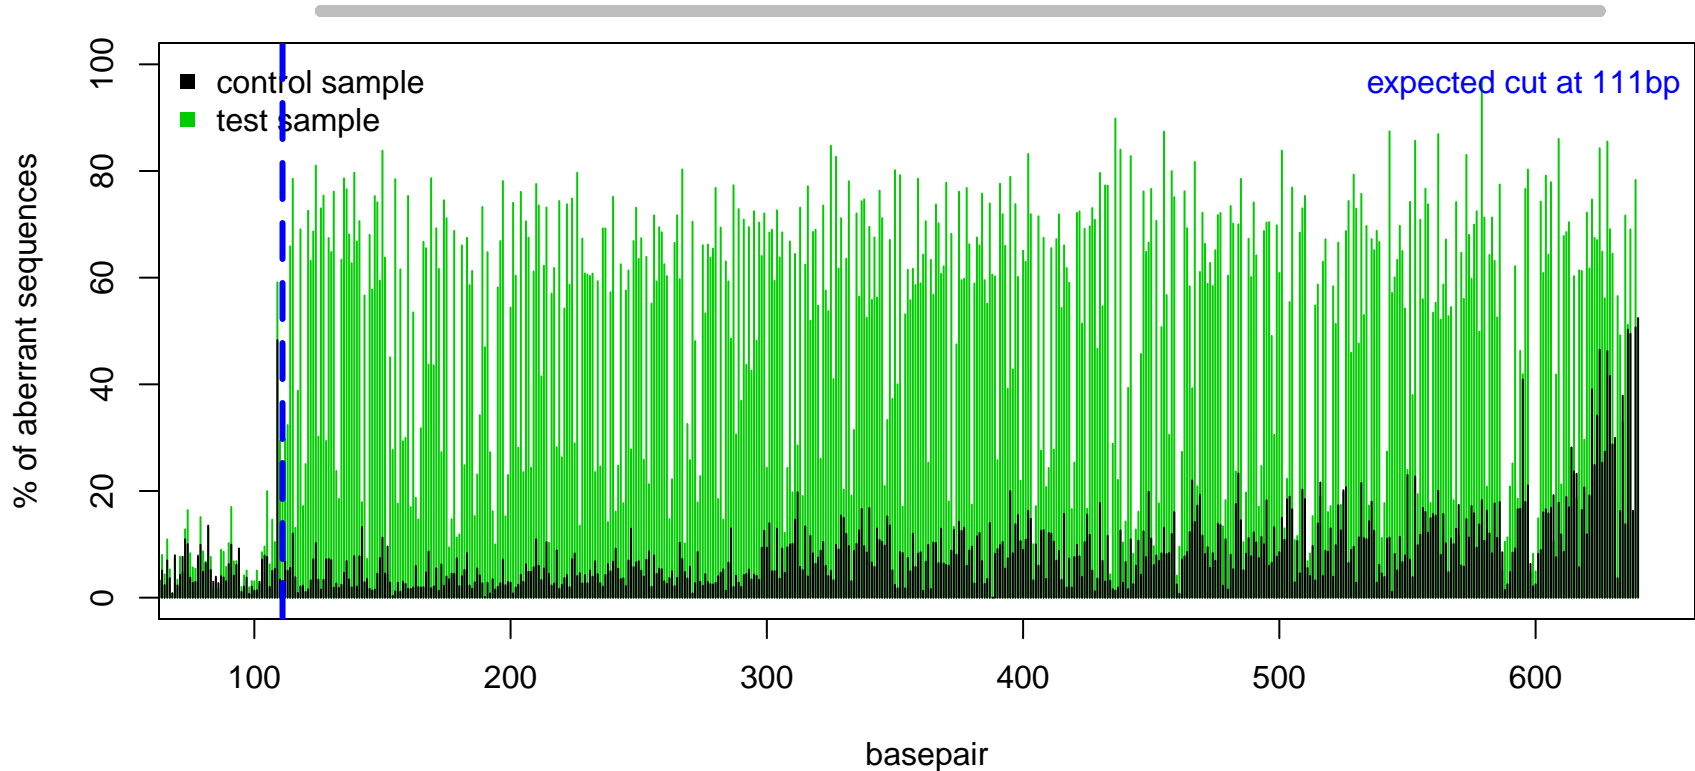

Warning: left boundary of decomposition window was adjusted 126 . It must be at least 5bp plus the maximum indel size downstream of the expected break site

Warning: right boundary of decomposition window was adjusted to 625 . It must be at least 5bp plus the maximum indel size downstream of the expected break site

sample: Bth/WT cell line, gRNA 1.3, reverse  
guide: GGGTGGGACAGAACTTCCCC

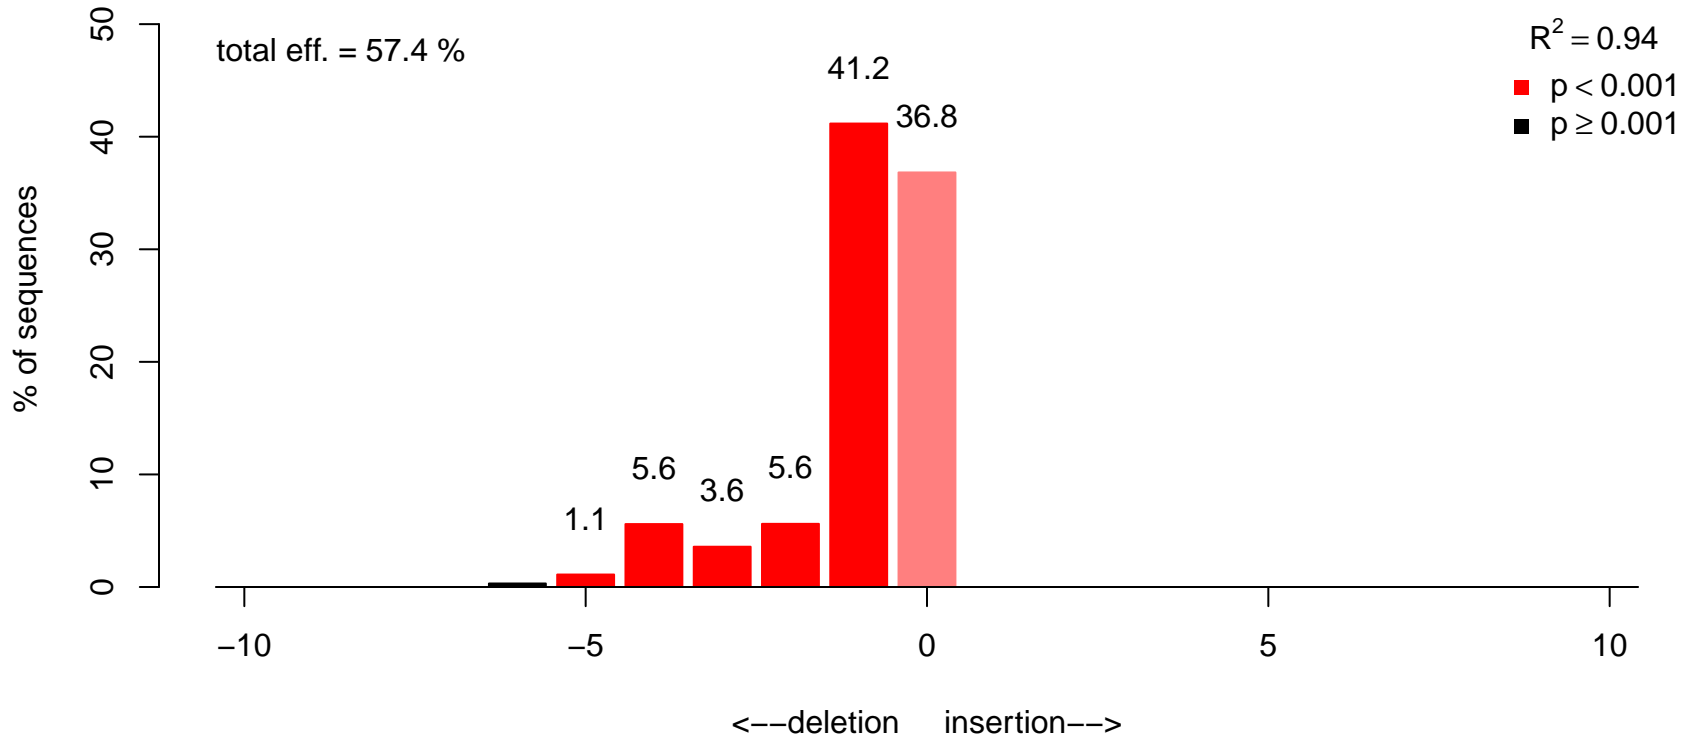

sample: Bth/WT cell line, gRNA 1.3, reverse  
guide: GGGTGGGACAGAACTTCCCC

region for decomposition

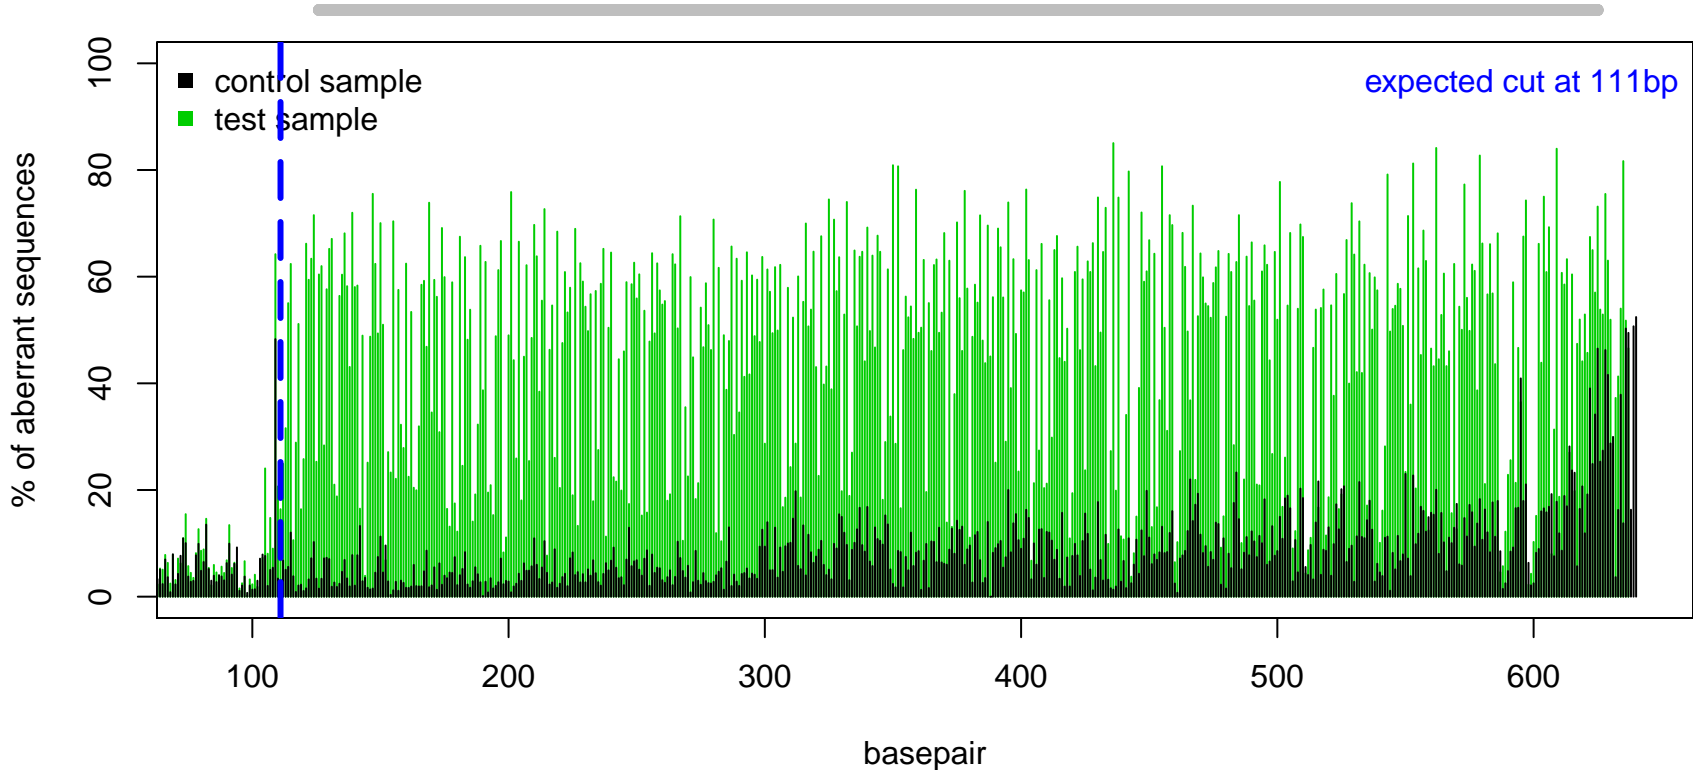

Warning: left boundary of decomposition window was adjusted 126 . It must be at least 5bp plus the maximum indel size downstream of the expected break site

Warning: right boundary of decomposition window was adjusted to 625 . It must be at least 5bp plus the maximum indel size downstream of the expected break site

sample: Bth/WT cell line, gRNA 1.4, reverse  
guide: GGGTGGGACAGAACTTCCCC

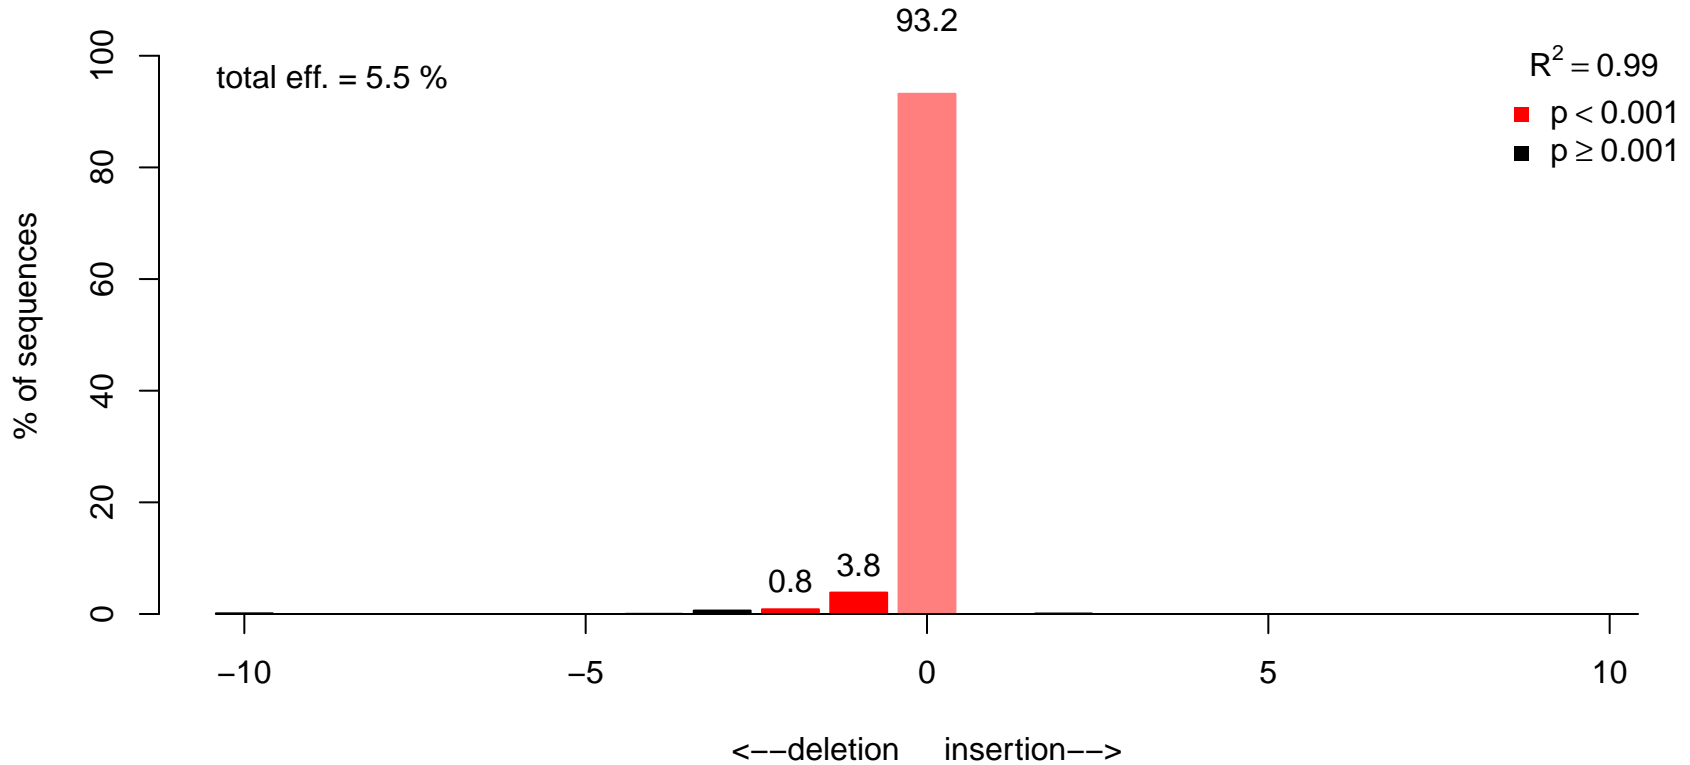

sample: Bth/WT cell line, gRNA 1.4, reverse  
guide: GGGTGGGACAGAACTTCCCC

region for decomposition

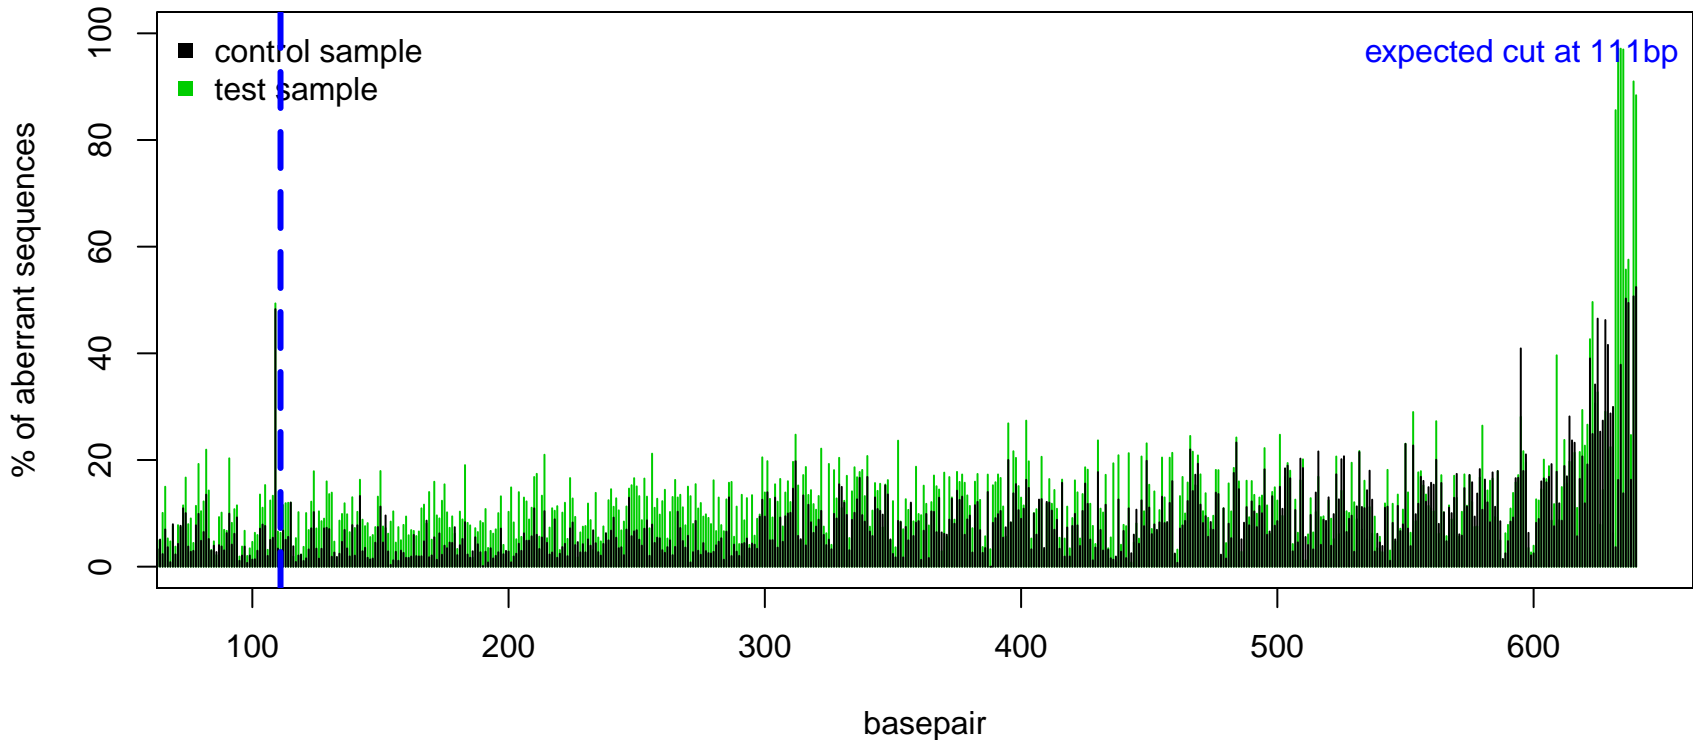

Warning: left boundary of decomposition window was adjusted 126 . It must be at least 5bp plus the maximum indel size downstream of the expected break site

Warning: right boundary of decomposition window was adjusted to 625 . It must be at least 5bp plus the maximum indel size downstream of the expected break site

sample: Bth/WT cell line, gRNA 2.1, reverse  
guide: TGGGACAGAACTTCCCCAGG

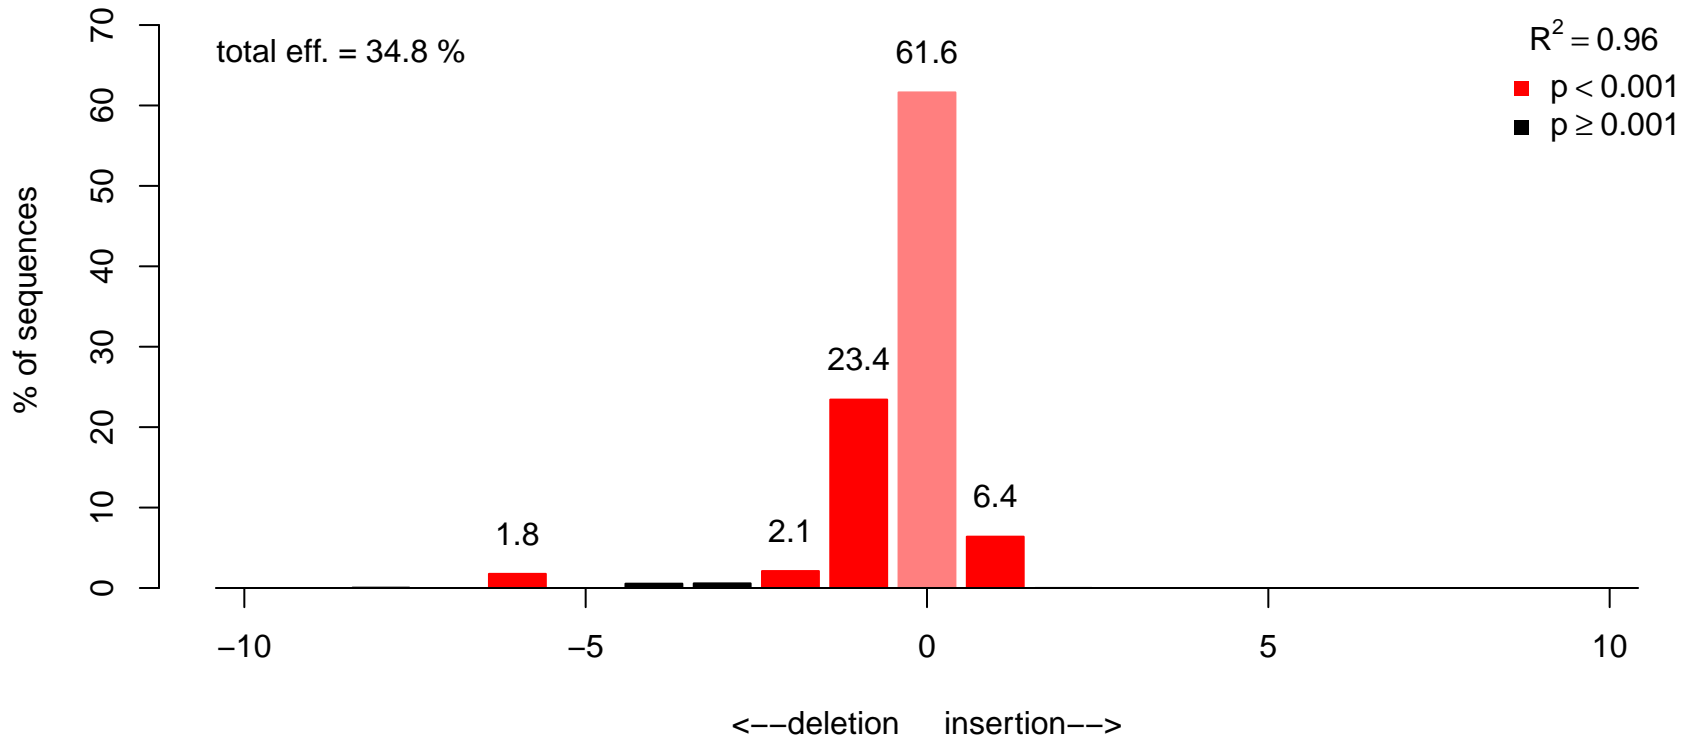



sample: Bth/WT cell line, gRNA 2.1, reverse  
guide: TGGGACAGAACTTCCCCAGG

region for decomposition

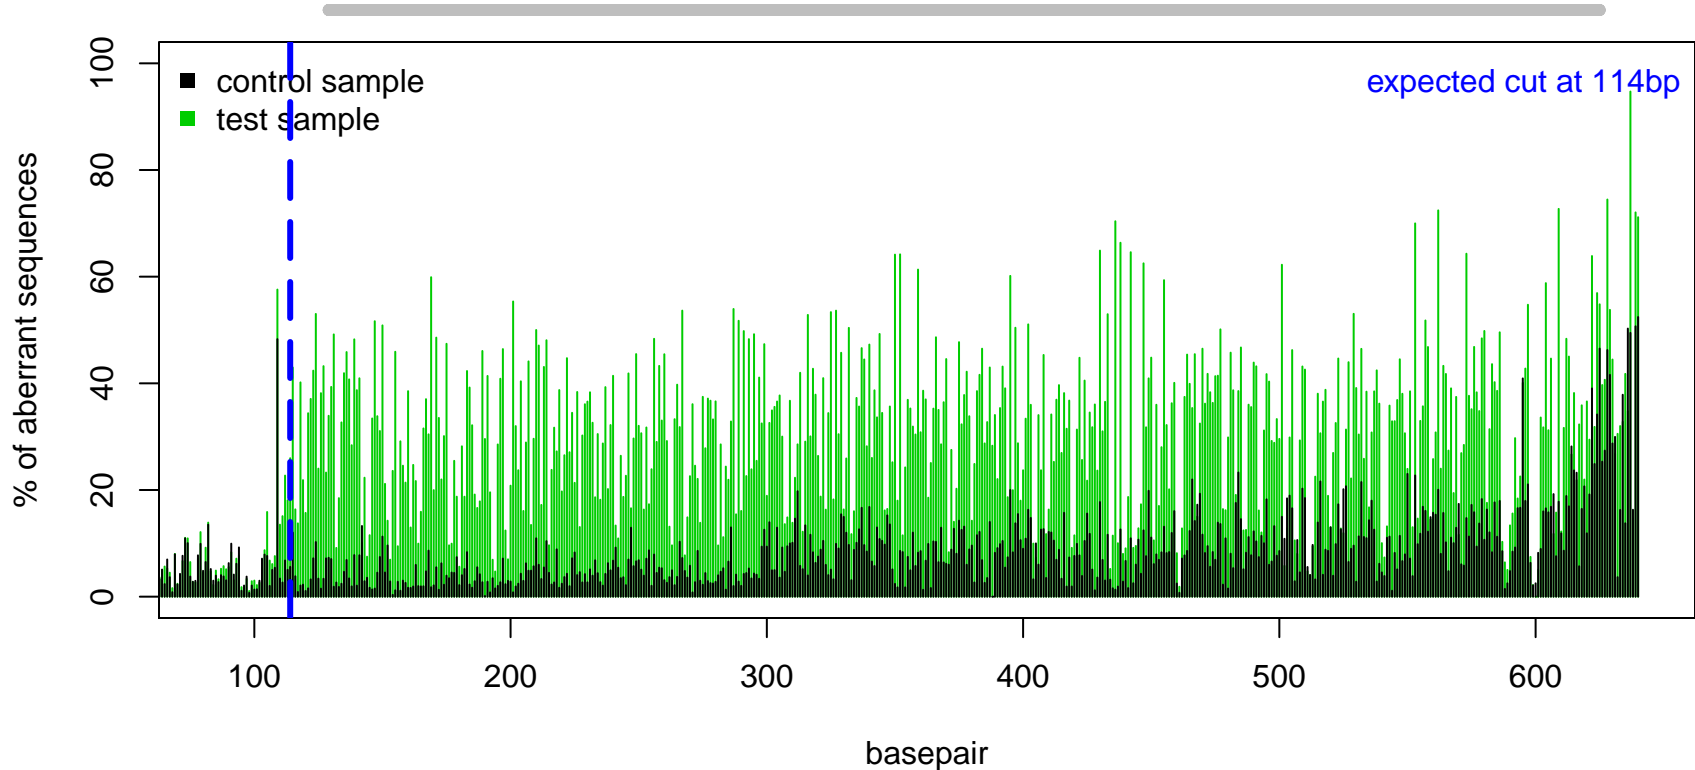

Warning: left boundary of decomposition window was adjusted 129 . It must be at least 5bp plus the maximum indel size downstream of the expected break site

Warning: right boundary of decomposition window was adjusted to 625 . It must be at least 5bp plus the maximum indel size downstream of the expected break site

sample: Bth/WT cell line, gRNA 2.2, reverse  
guide: TGGGACAGAACTTCCCCAGG

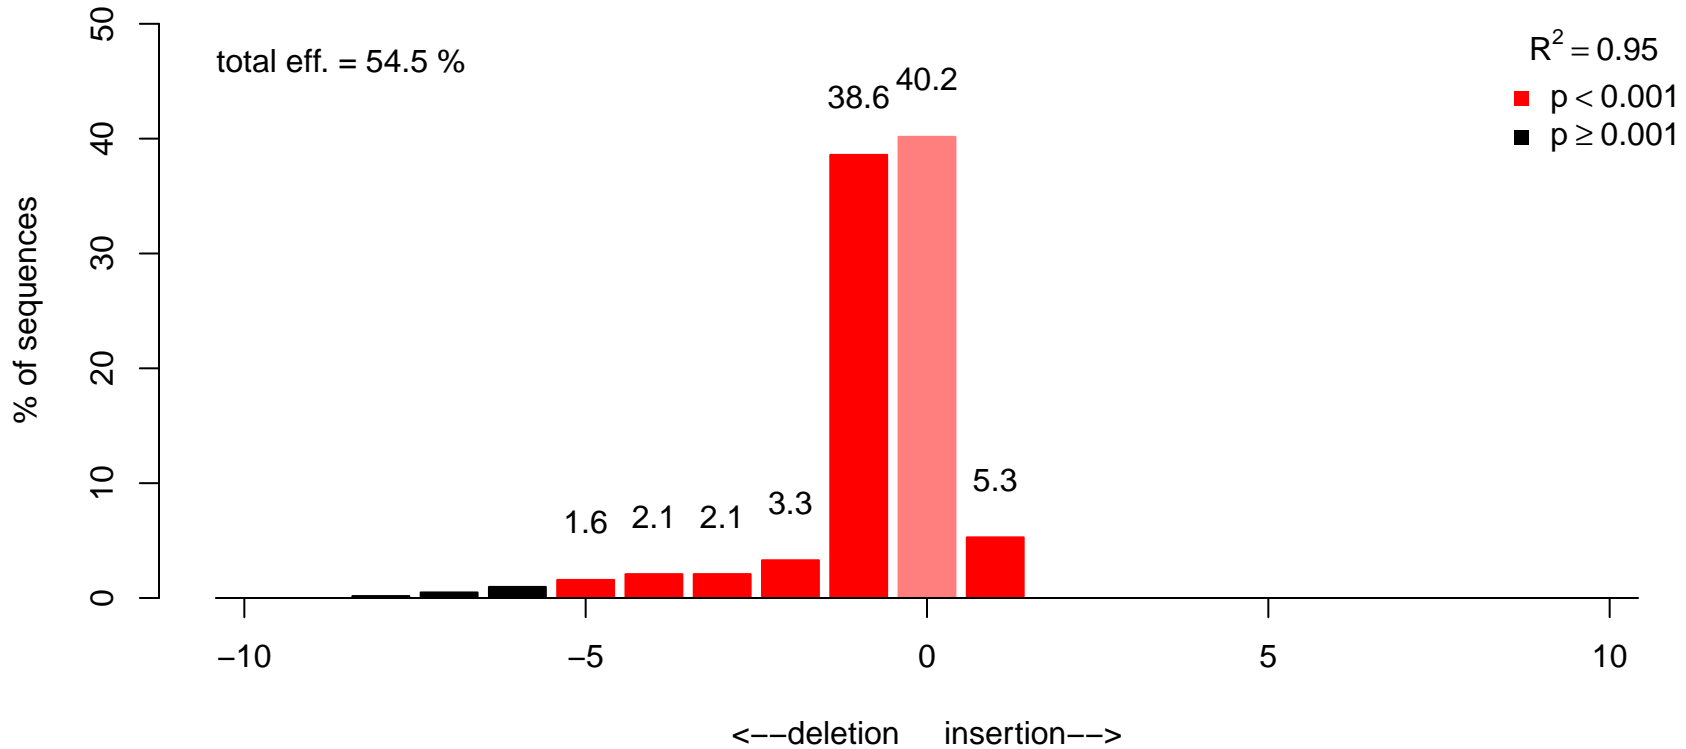

sample: Bth/WT cell line, gRNA 2.2, reverse  
guide: TGGGACAGAACTTCCCCAGG

region for decomposition

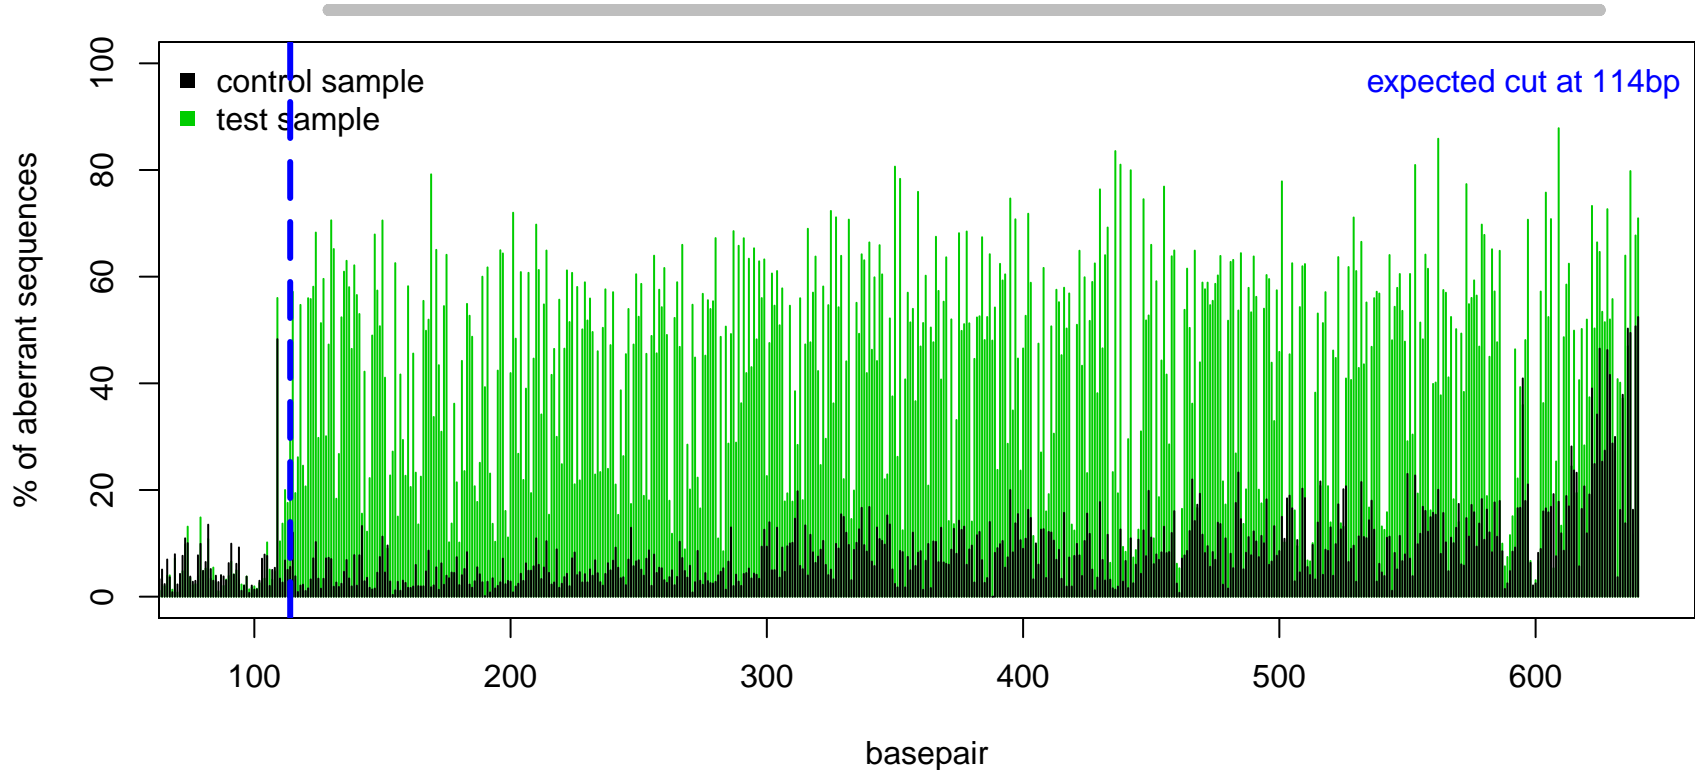

Warning: left boundary of decomposition window was adjusted 129 . It must be at least 5bp plus the maximum indel size downstream of the expected break site

Warning: right boundary of decomposition window was adjusted to 625 . It must be at least 5bp plus the maximum indel size downstream of the expected break site

sample: Bth/WT cell line, gRNA 2.3, reverse  
guide: TGGGACAGAACTTCCCCAGG

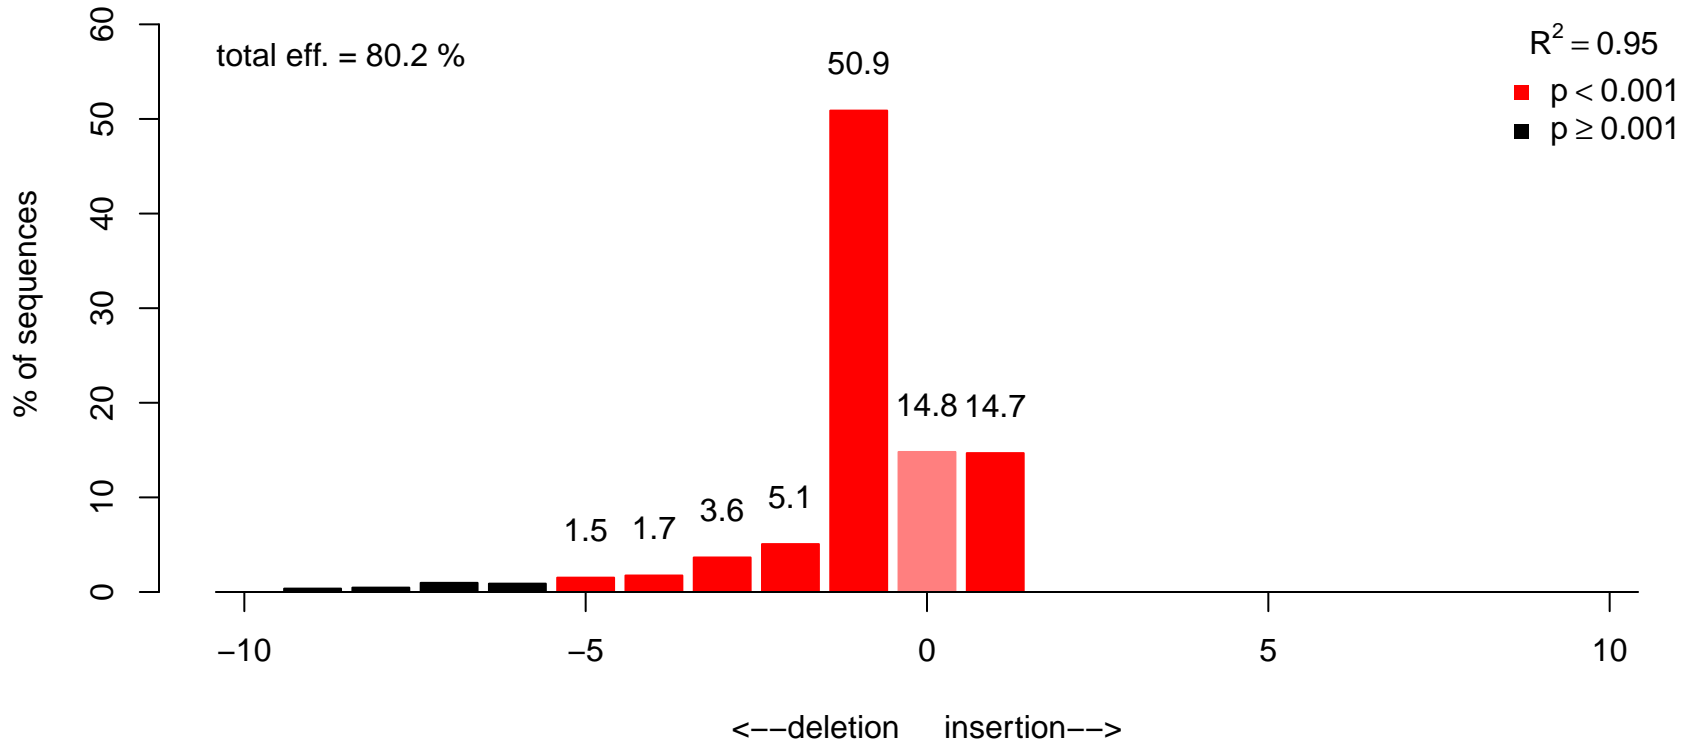

sample: Bth/WT cell line, gRNA 2.3, reverse  
guide: TGGGACAGAACTTCCCCAGG

region for decomposition

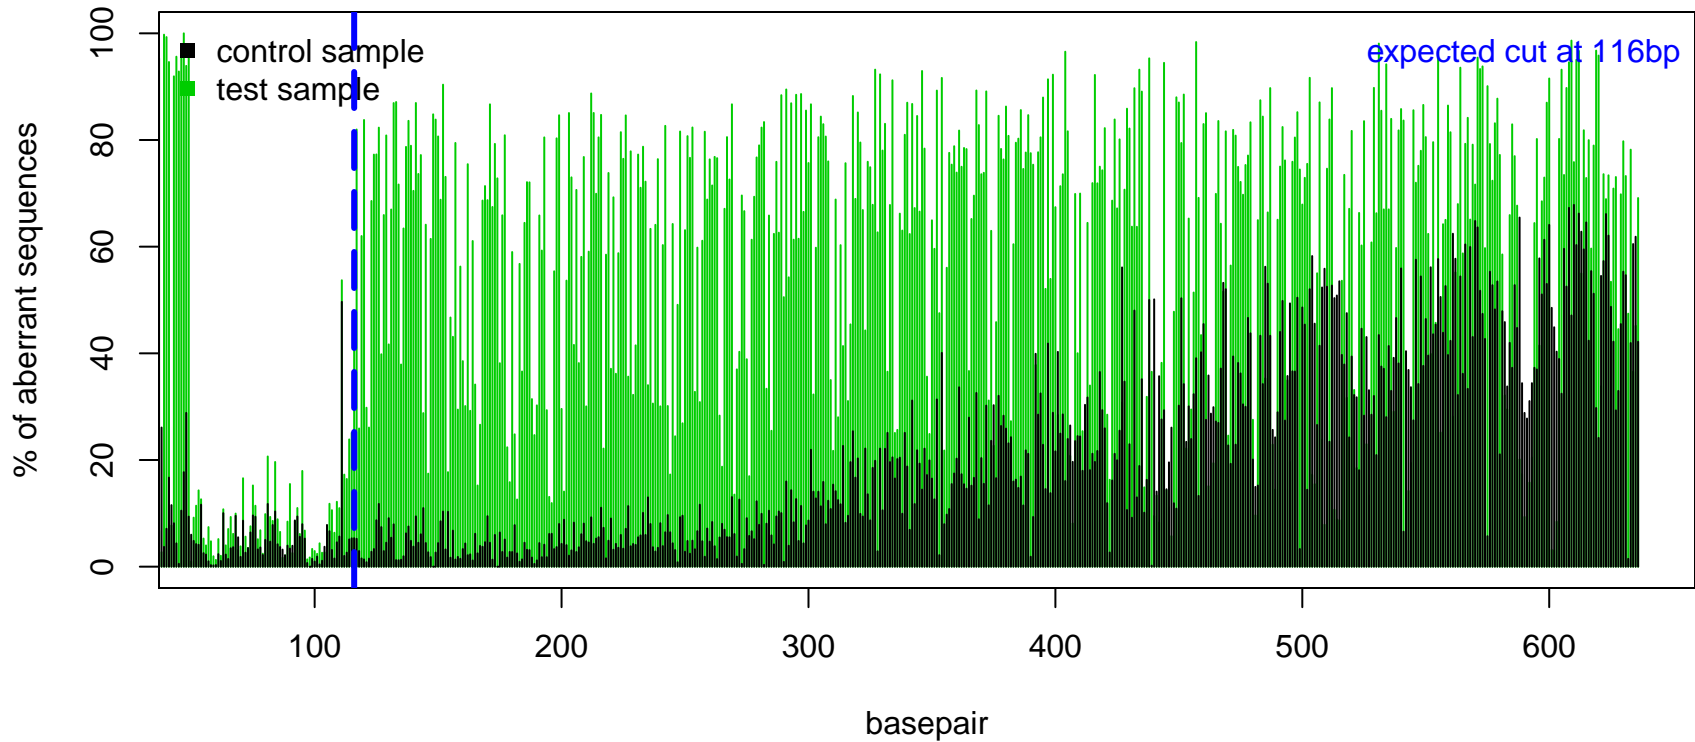

Warning: left boundary of decomposition window was adjusted 131 . It must be at least 5bp plus the maximum indel size downstream of the expected break site

sample: Bth/WT cell line, gRNA 2.4, reverse  
guide: TGGGACAGAACTTCCCCAGG

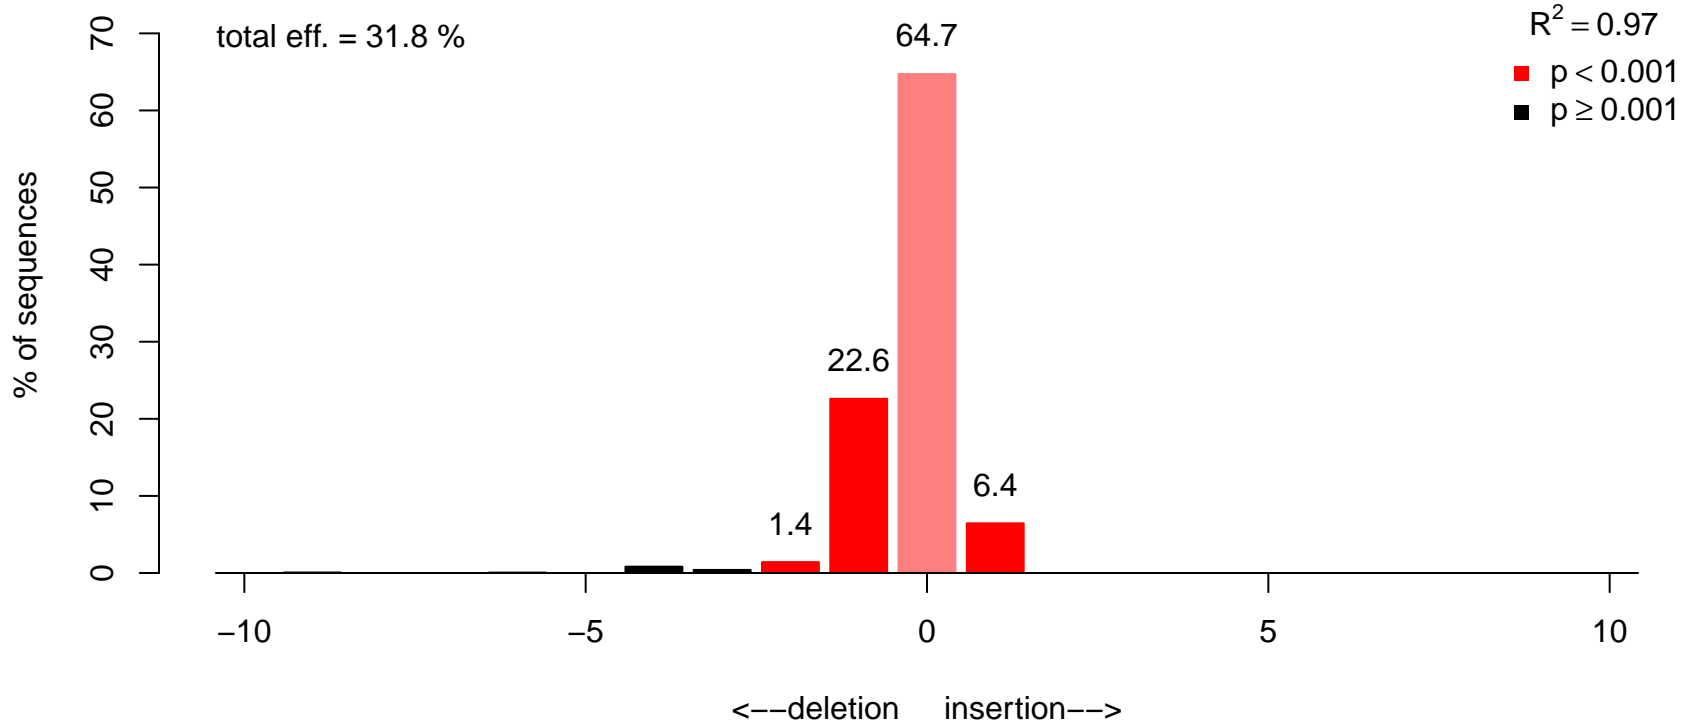

sample: Bth/WT cell line, gRNA 2.4, reverse  
guide: TGGGACAGAACTTCCCCAGG

region for decomposition

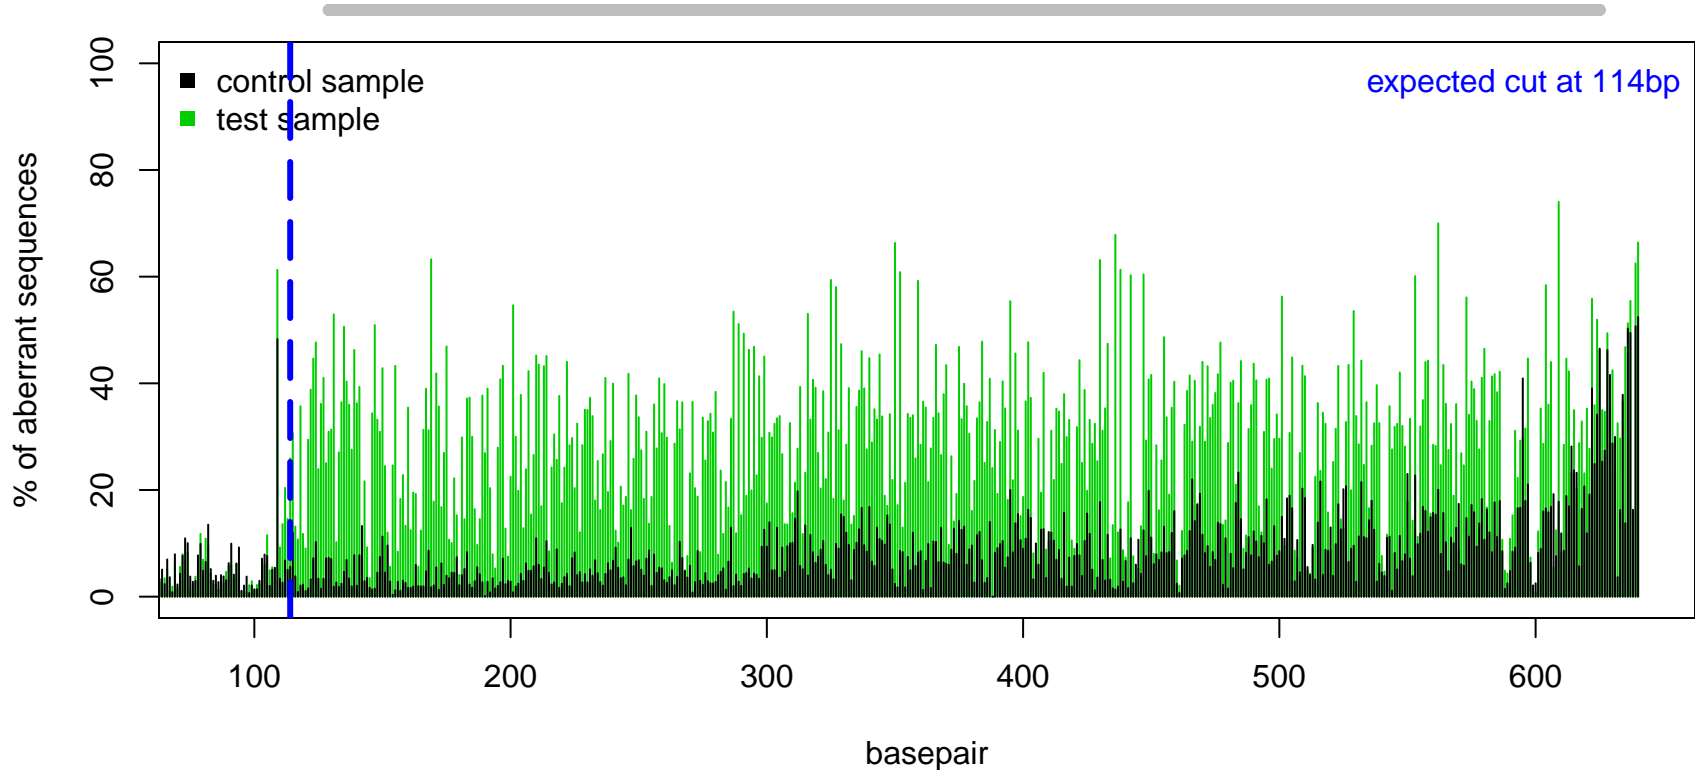

Warning: left boundary of decomposition window was adjusted 129 . It must be at least 5bp plus the maximum indel size downstream of the expected break site

Warning: right boundary of decomposition window was adjusted to 625 . It must be at least 5bp plus the maximum indel size downstream of the expected break site

sample: Bth/WT cell line, gRNA 3.1, reverse  
guide: TGGTAATGTCCCTCCTGGGG

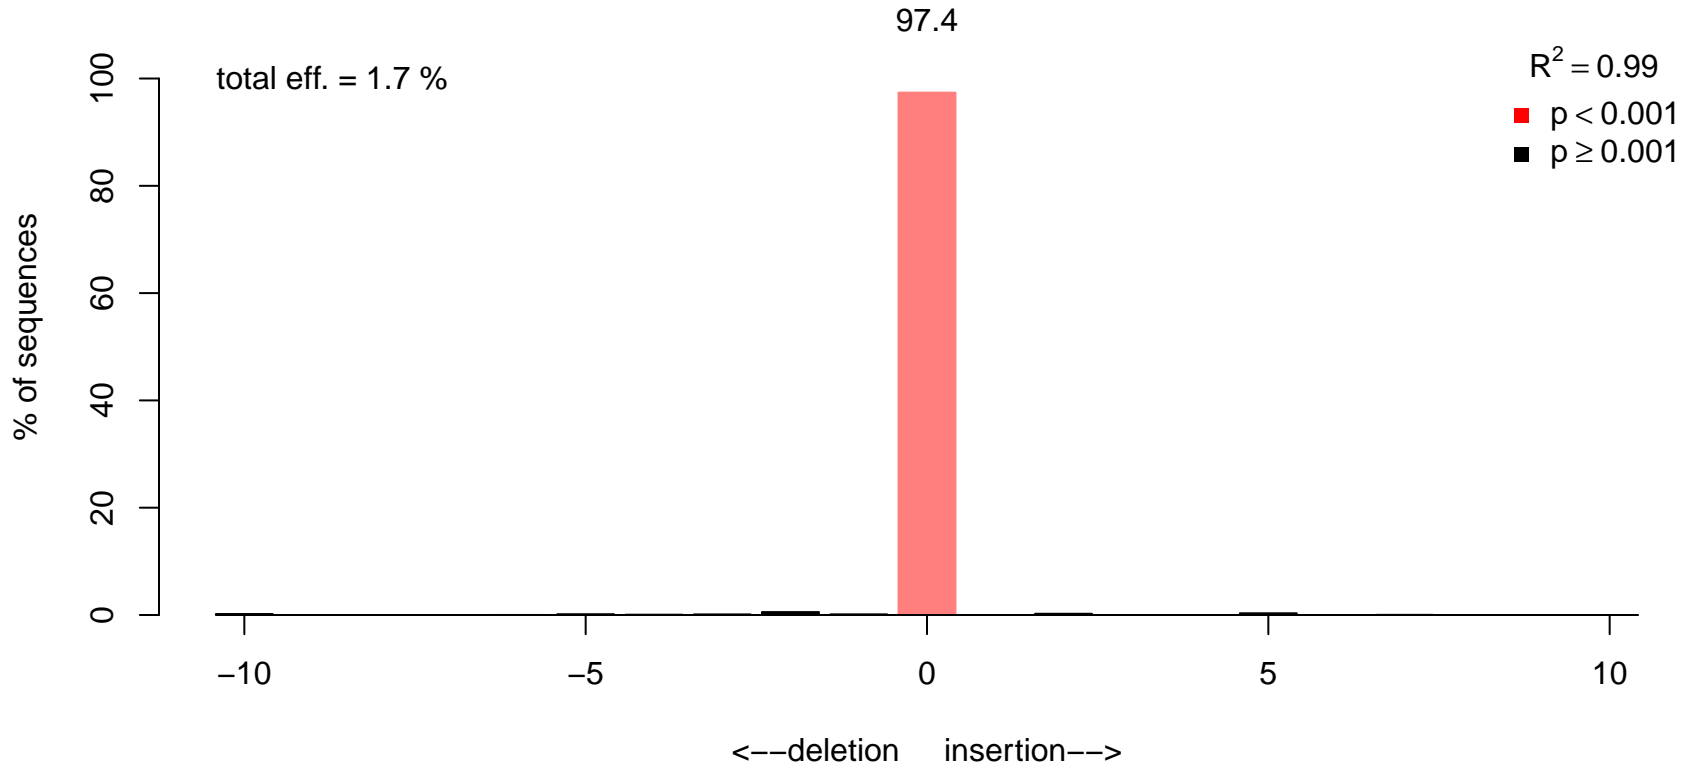



sample: Bth/WT cell line, gRNA 3.1, reverse  
guide: TGGTAATGTCCCTCCTGGGG

region for decomposition

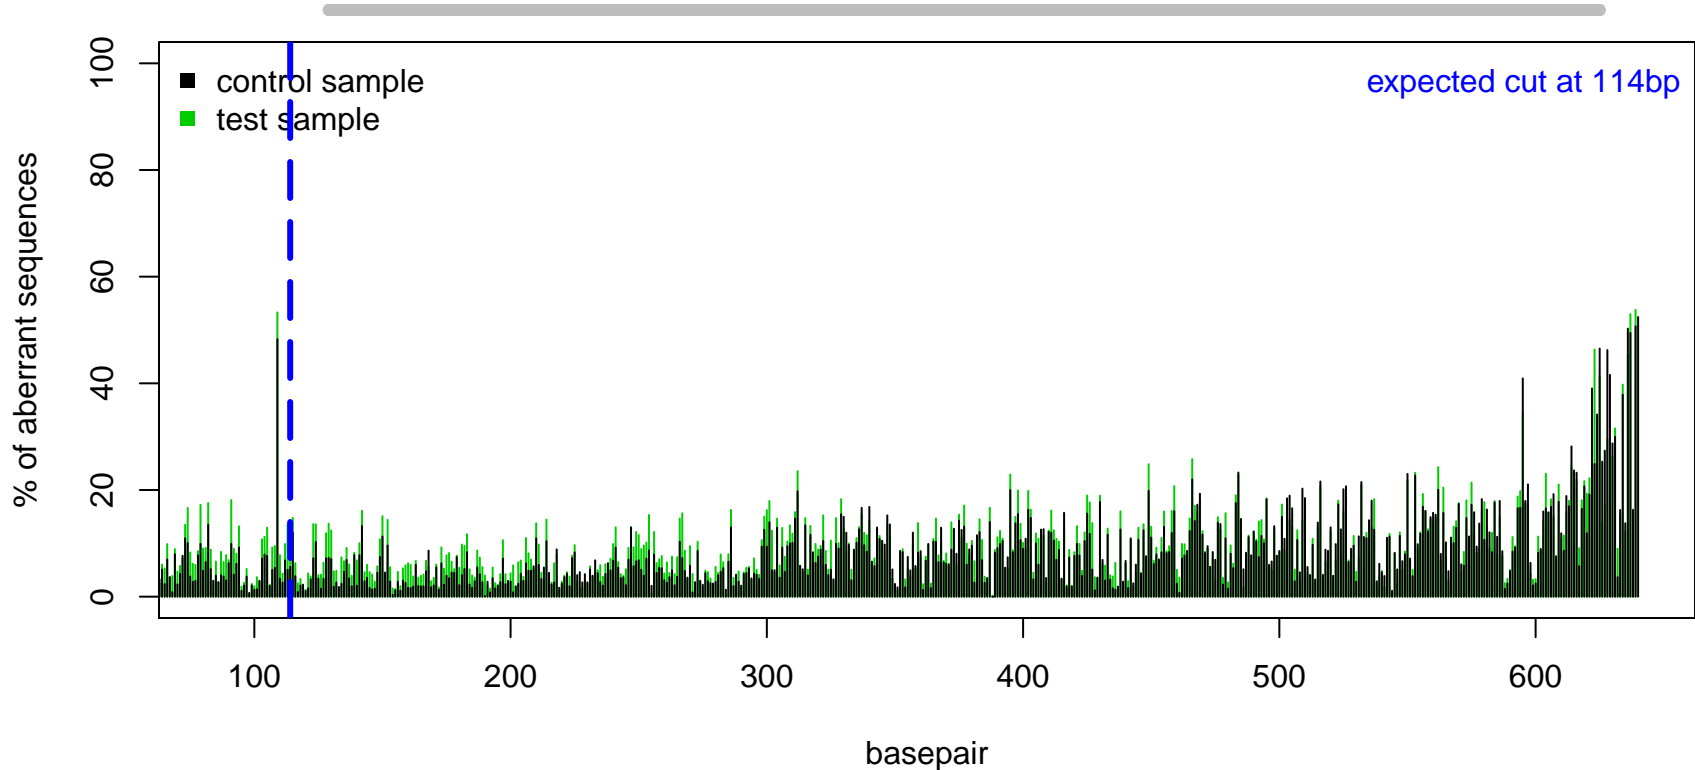

Warning: left boundary of decomposition window was adjusted 129 . It must be at least 5bp plus the maximum indel size downstream of the expected break site

Warning: right boundary of decomposition window was adjusted to 625 . It must be at least 5bp plus the maximum indel size downstream of the expected break site

sample: Bth/WT cell line, gRNA 3.2, reverse  
guide: TGGTAATGTCCCTCCTGGGG

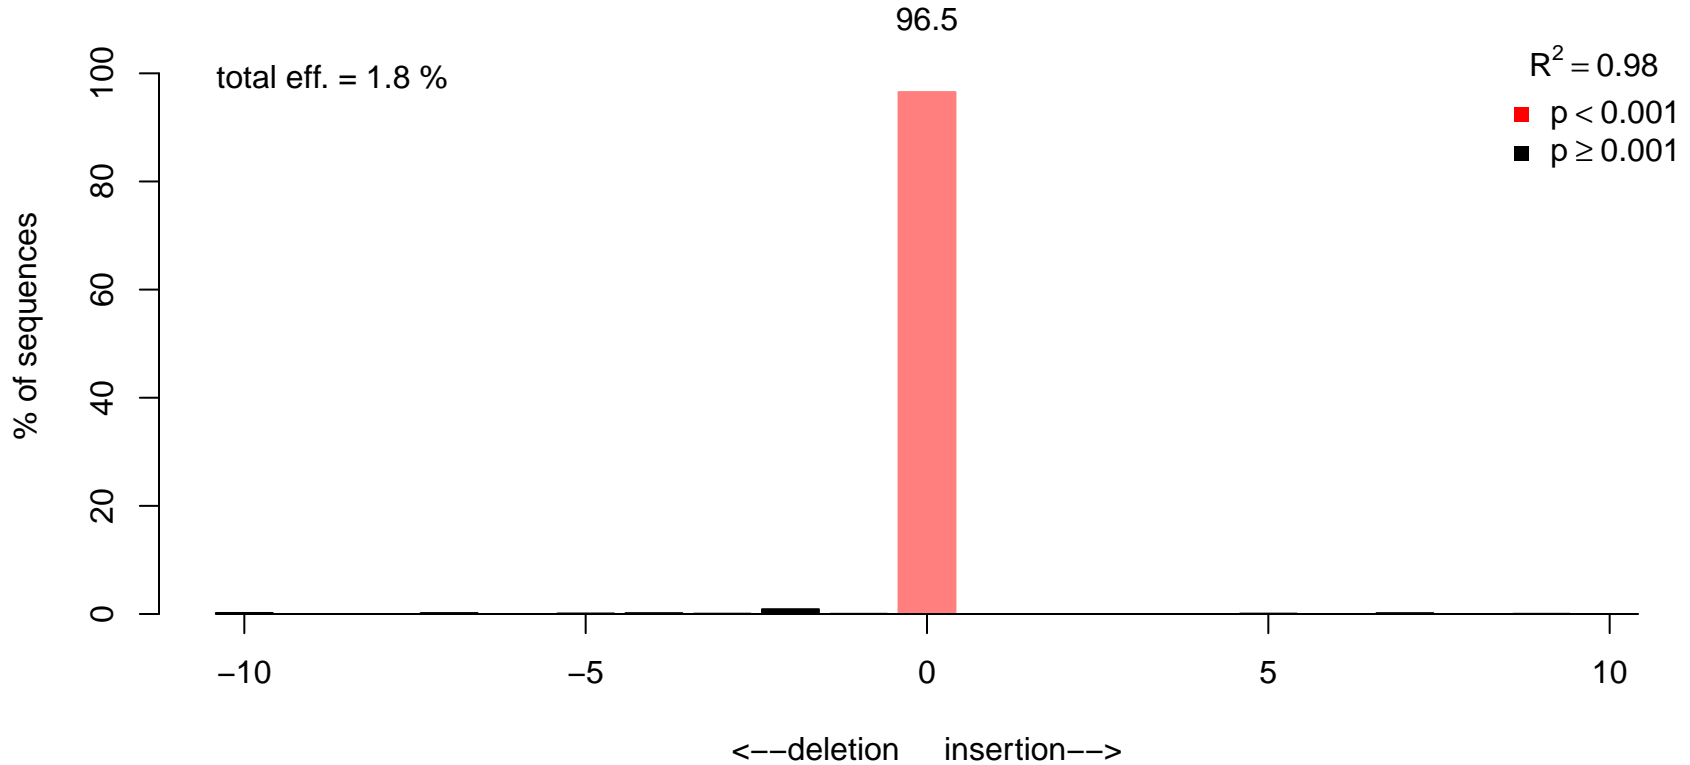

sample: Bth/WT cell line, gRNA 3.2, reverse  
guide: TGGTAATGTCCCTCCTGGGG

region for decomposition

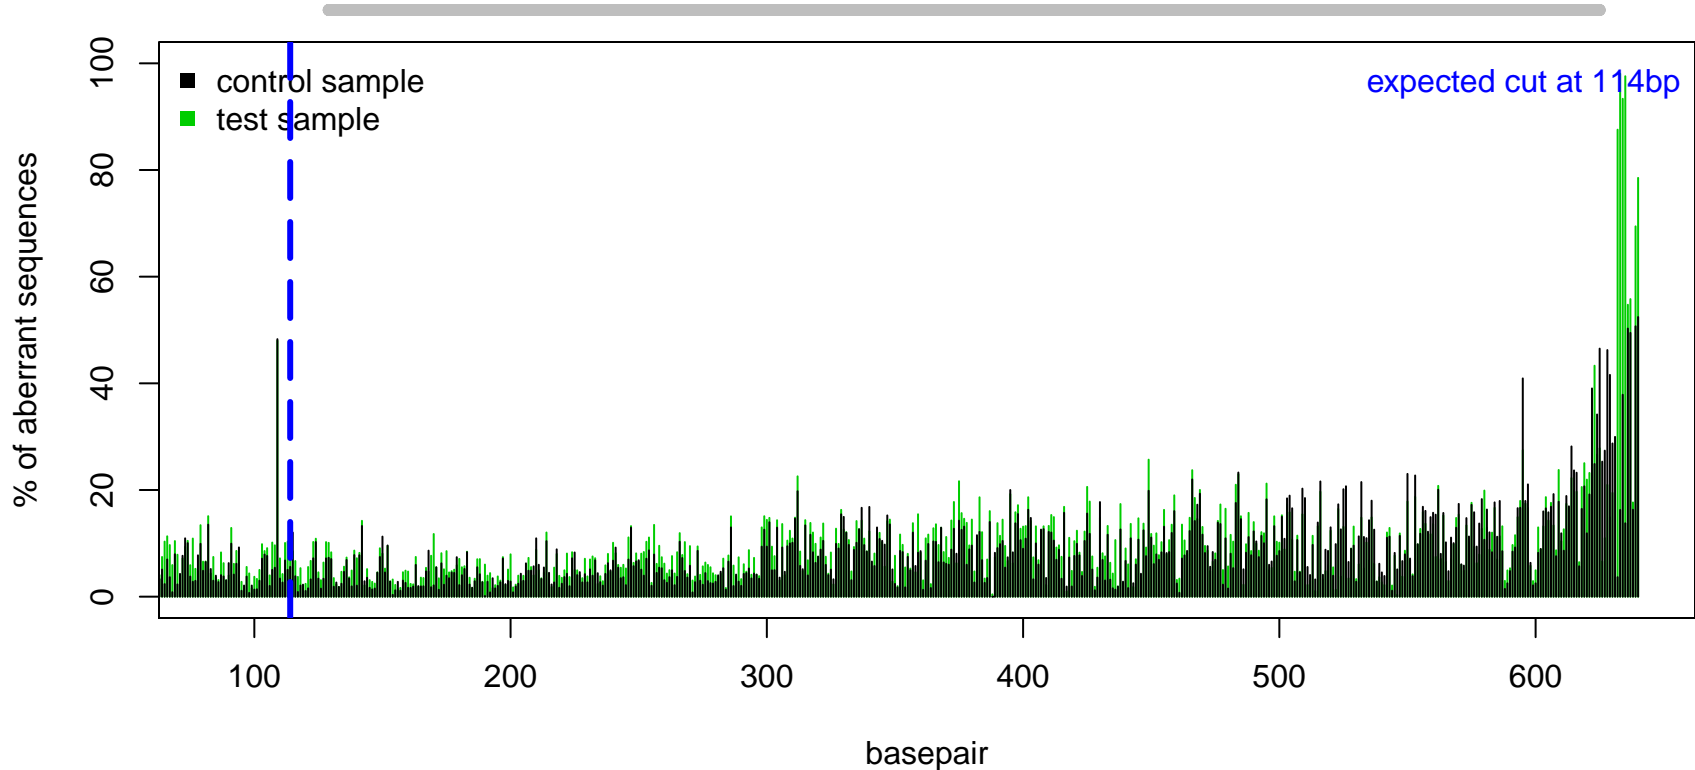

Warning: left boundary of decomposition window was adjusted 129 . It must be at least 5bp plus the maximum indel size downstream of the expected break site

Warning: right boundary of decomposition window was adjusted to 625 . It must be at least 5bp plus the maximum indel size downstream of the expected break site

sample: Bth/WT cell line, gRNA 3.3, reverse  
guide: TGGTAATGTCCCTCCTGGGG

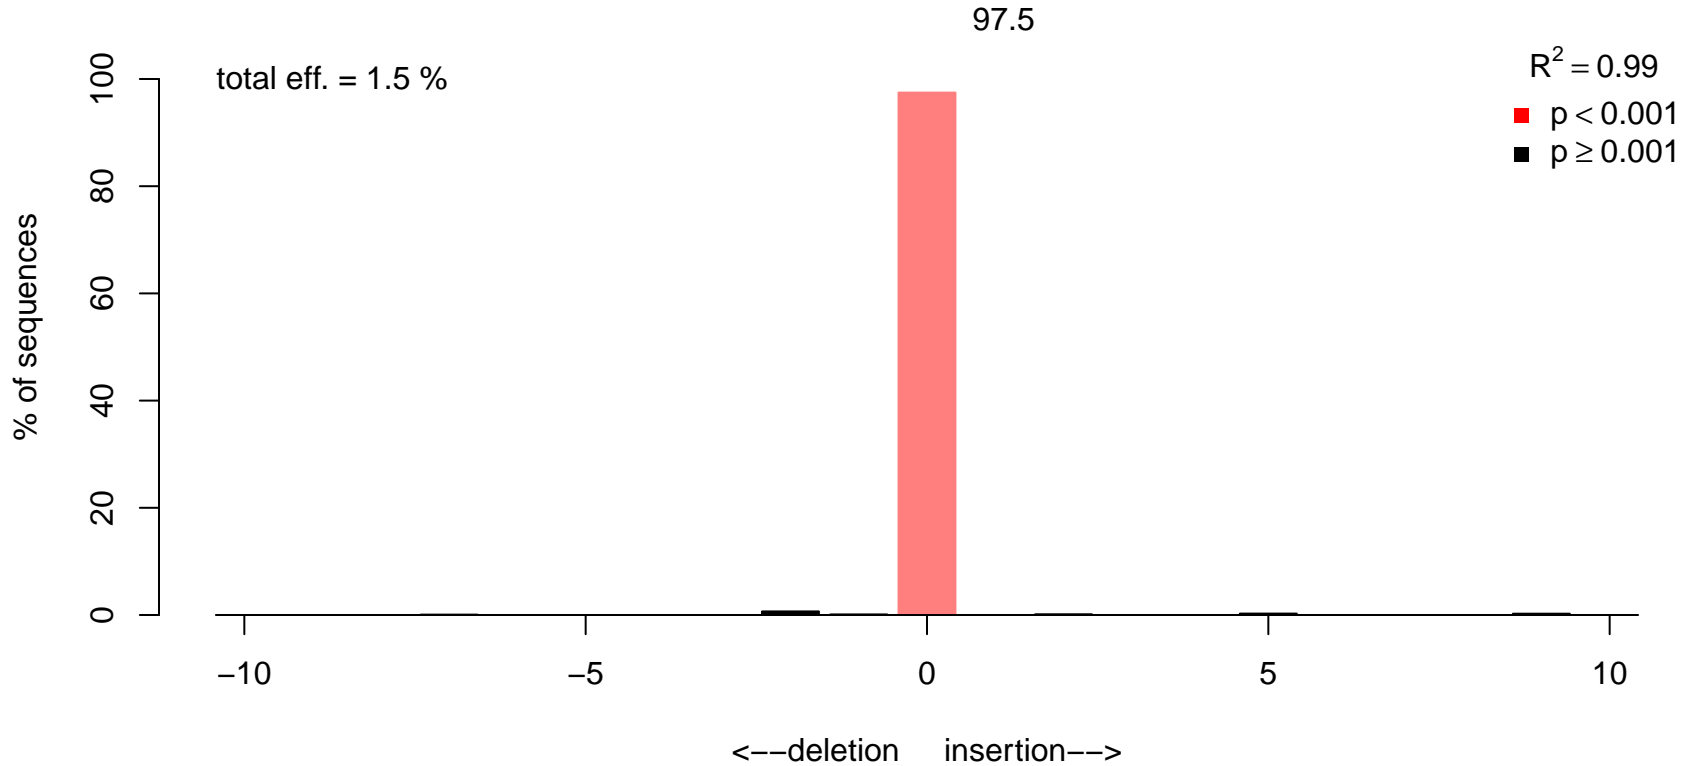

sample: Bth/WT cell line, gRNA 3.3, reverse  
guide: TGGTAATGTCCCTCCTGGGG

region for decomposition

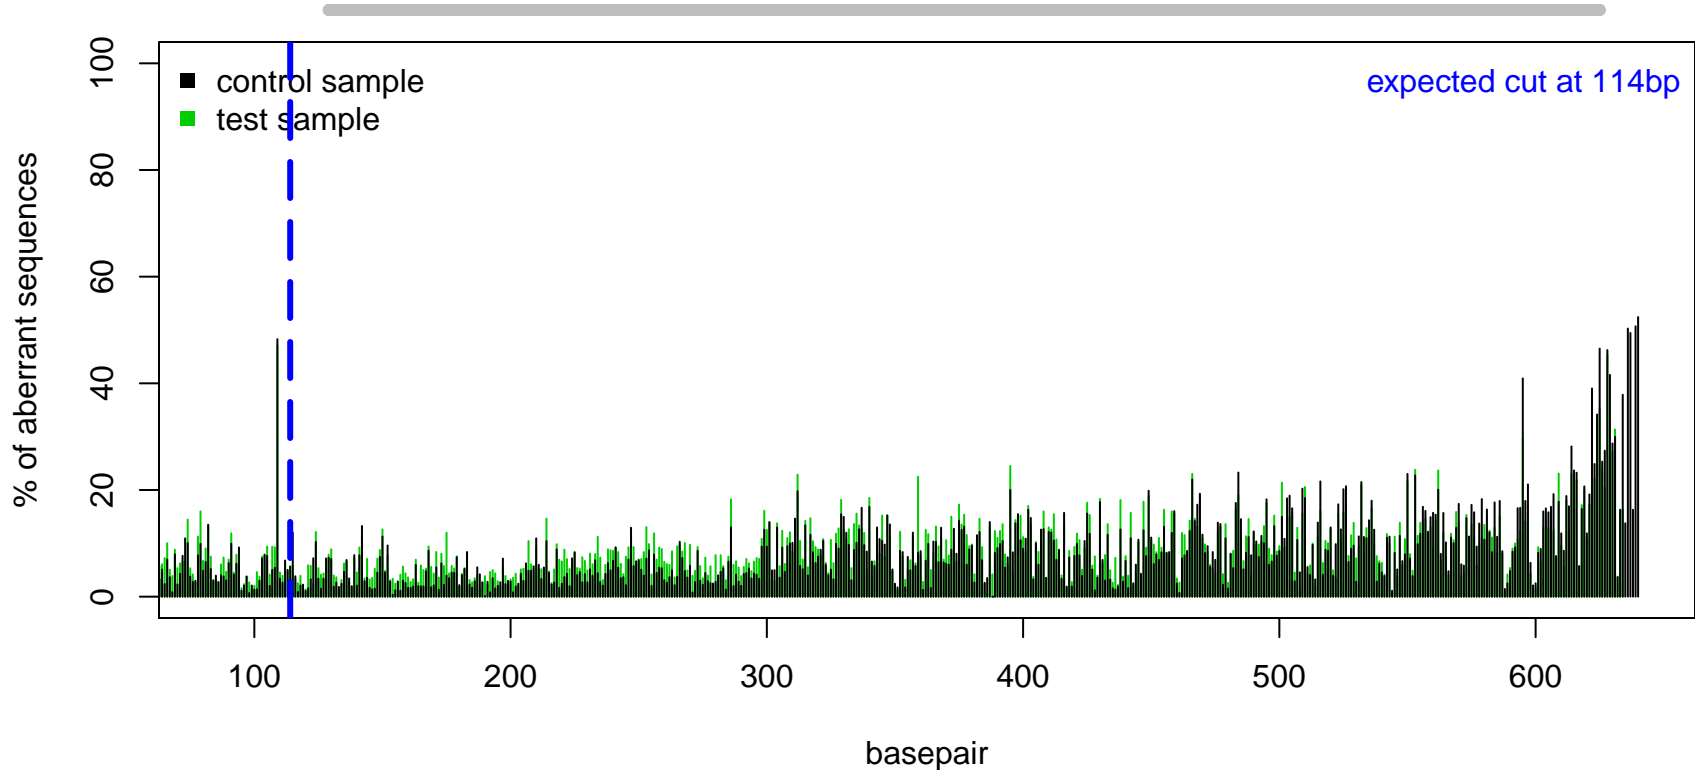

Warning: left boundary of decomposition window was adjusted 129 . It must be at least 5bp plus the maximum indel size downstream of the expected break site

Warning: right boundary of decomposition window was adjusted to 625 . It must be at least 5bp plus the maximum indel size downstream of the expected break site

sample: Bth/WT cell line, gRNA WT, forward  
guide: GGGTGGGACAGAACATCCCC

total eff. = 63.7 %

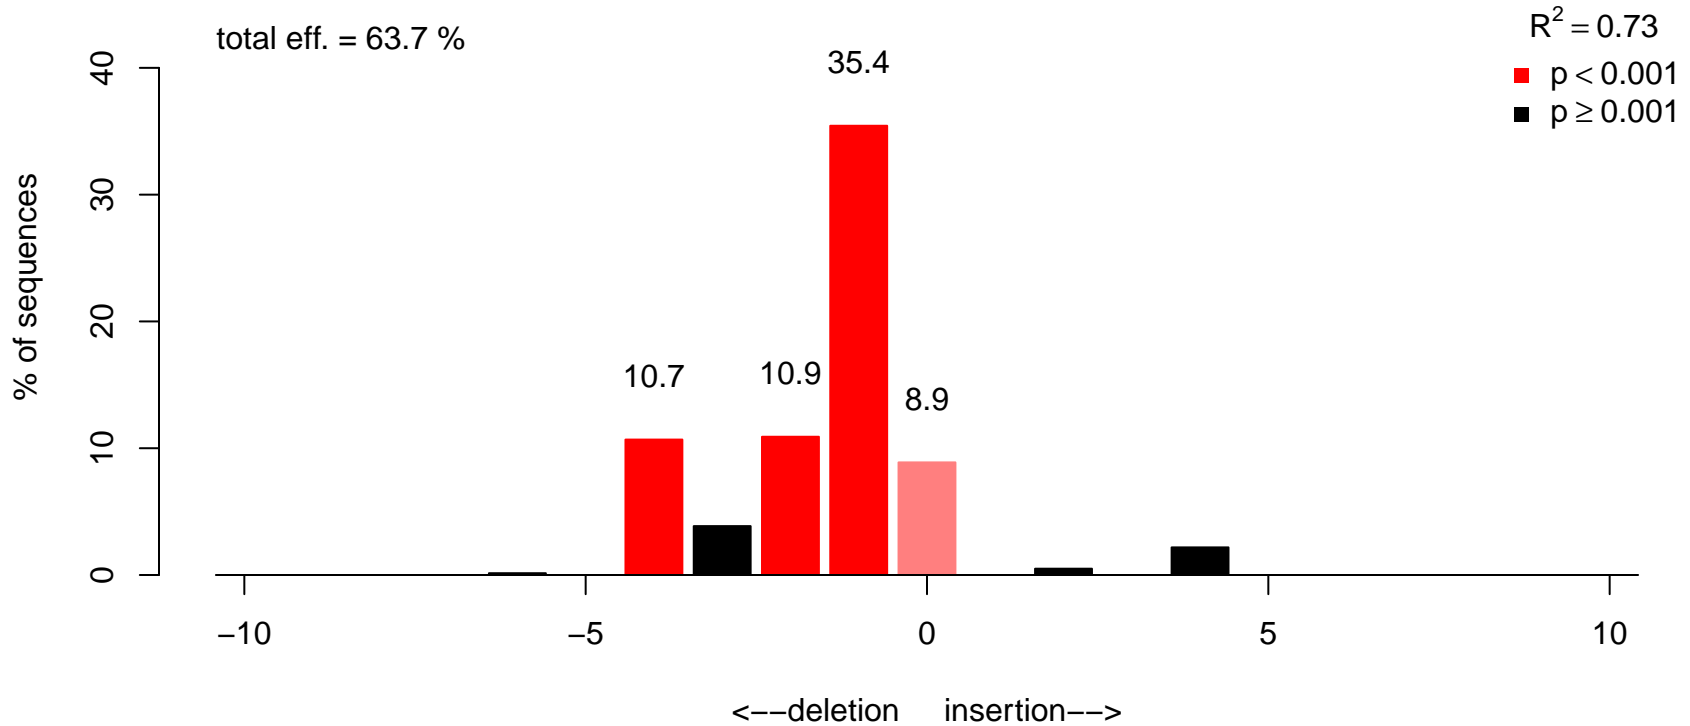

sample: Bth/WT cell line, gRNA WT, forward  
guide: GGGTGGGACAGAACATCCCC

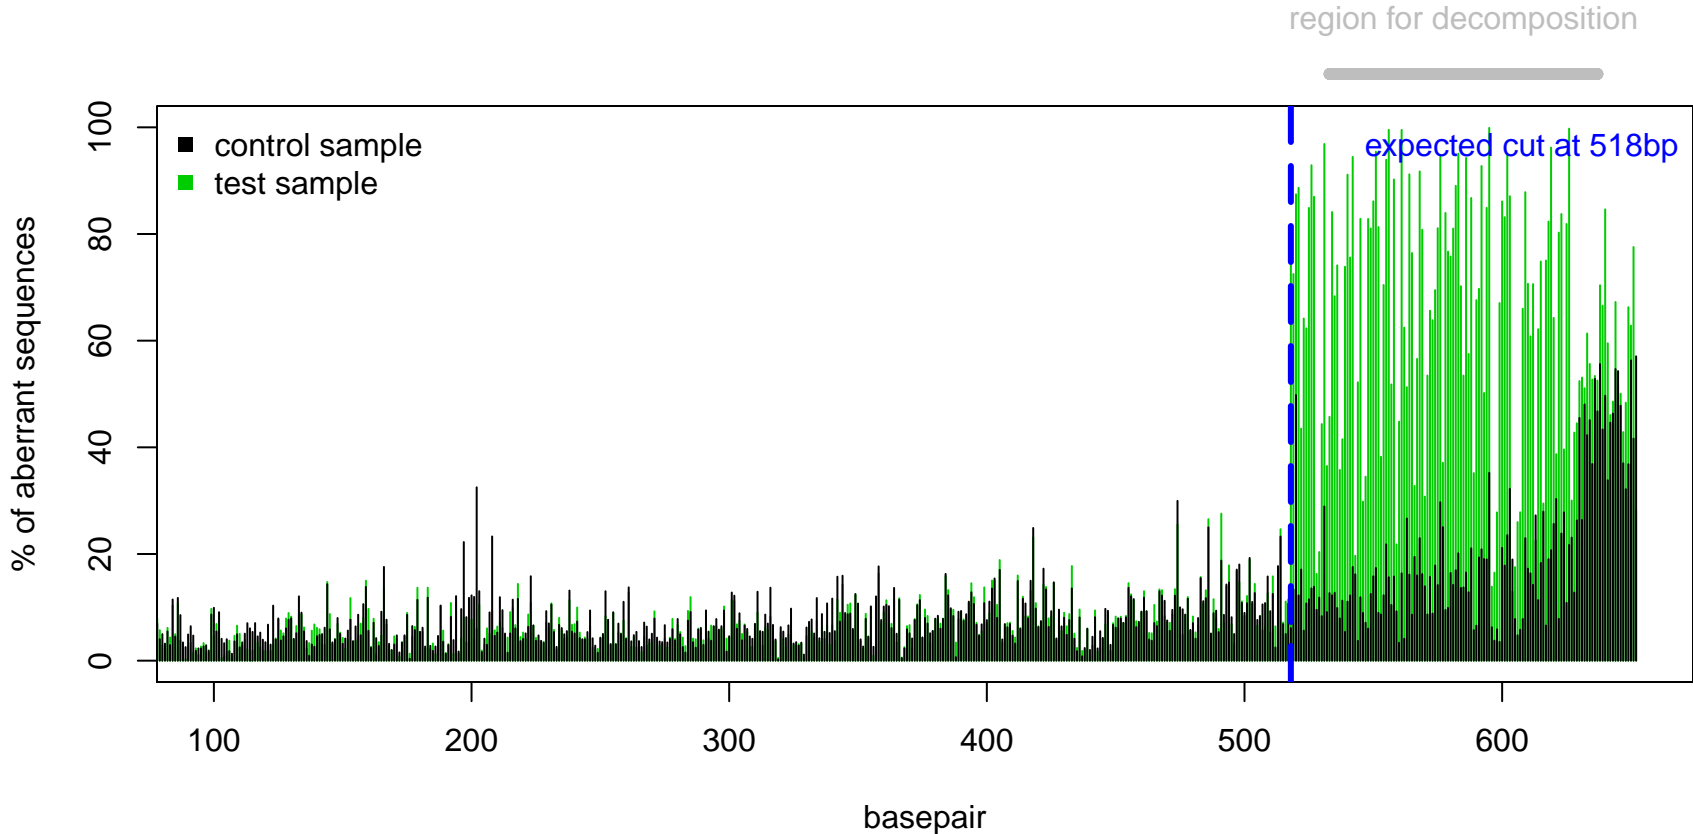

Warning: left boundary of decomposition window was adjusted 533 . It must be at least 5bp plus the maximum indel size downstream of the expected break site

Warning: right boundary of decomposition window was adjusted to 637 . It must be at least 5bp plus the maximum indel size downstream of the expected break site

sample: Bth/WT cell line, gRNA 1.1, forward  
guide: GGGTGGGACAGAACTTCCCC

total eff. = 62.5 %

$R^2 = 0.89$

■  $p < 0.001$

■  $p \geq 0.001$

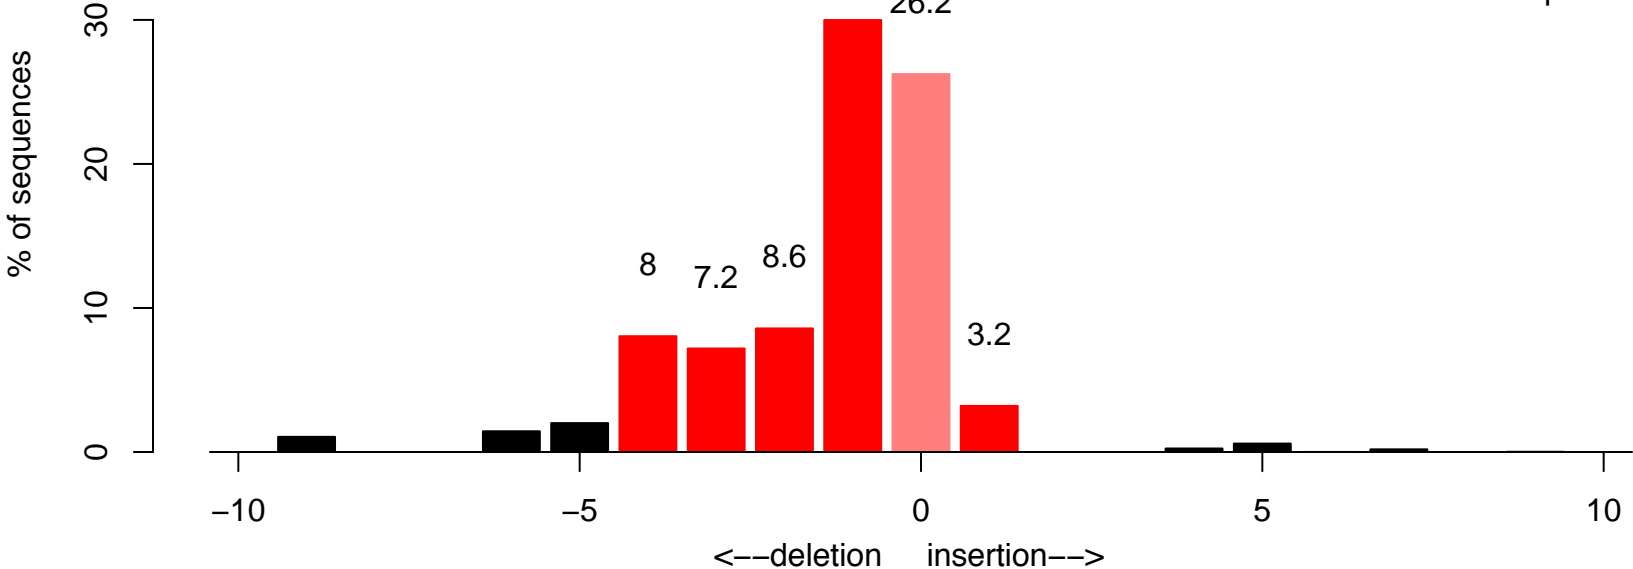

Warning: the spacing between the nucleotides in (one of) sanger sequence file(s) is not constant.

This might indicate for wrongly unannotated or wrongly additional annotated nucleotides.  
Decomposition window lower and check the chromatogram for abnormalities.



sample: Bth/WT cell line, gRNA 1.1, forward  
guide: GGGTGGGACAGAACTTCCCC

region for decomposition

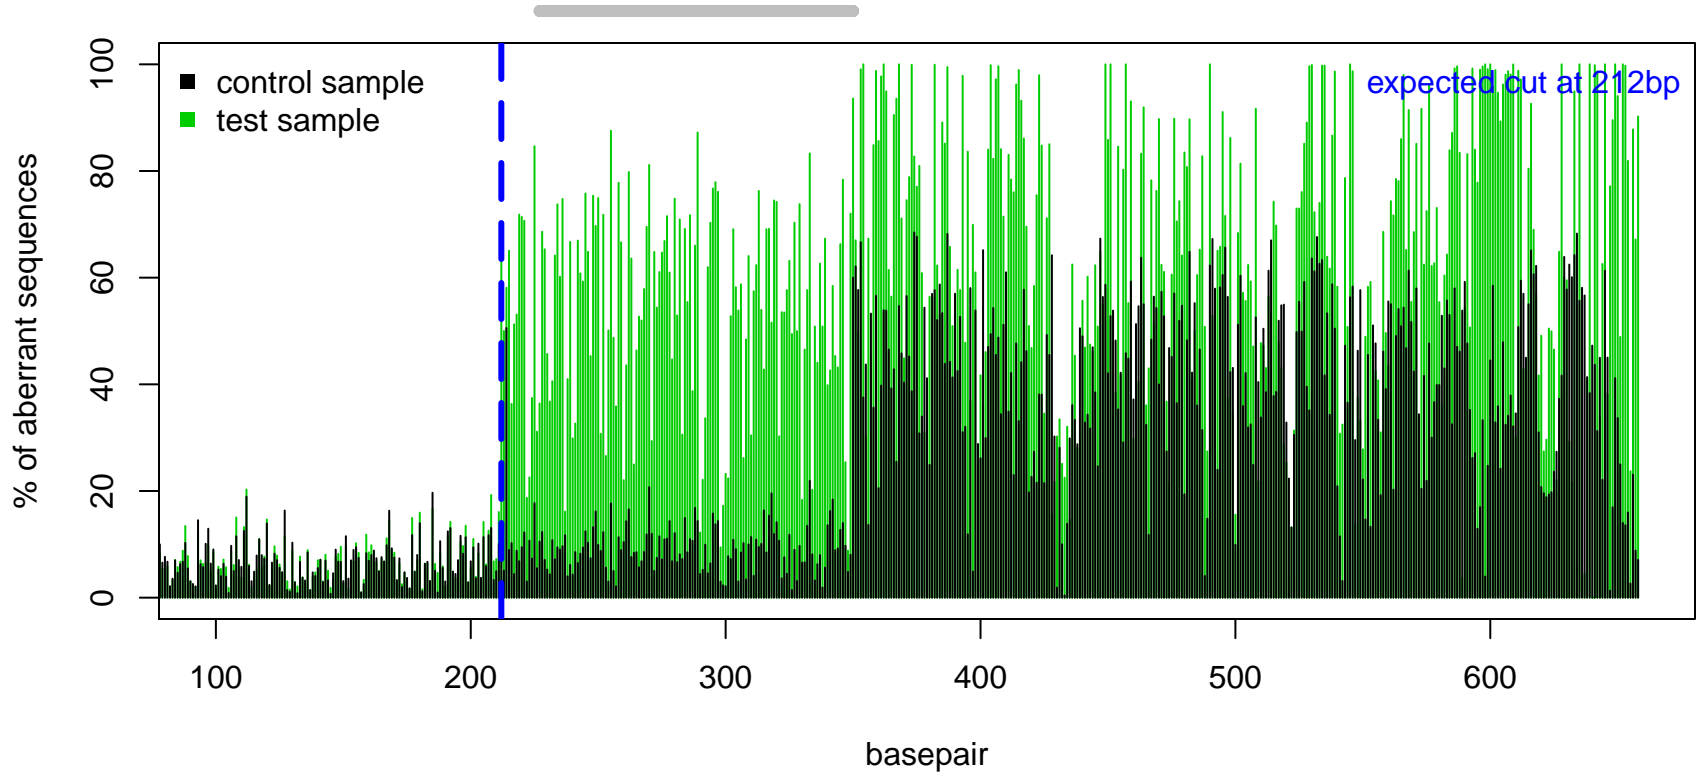

Warning: left boundary of decomposition window was adjusted 227 . It must be at least 5bp plus the maximum indel size downstream of the expected break site

sample: Bth/WT cell line, gRNA 1.2, forward  
guide: GGGTGGGACAGAACTTCCCC

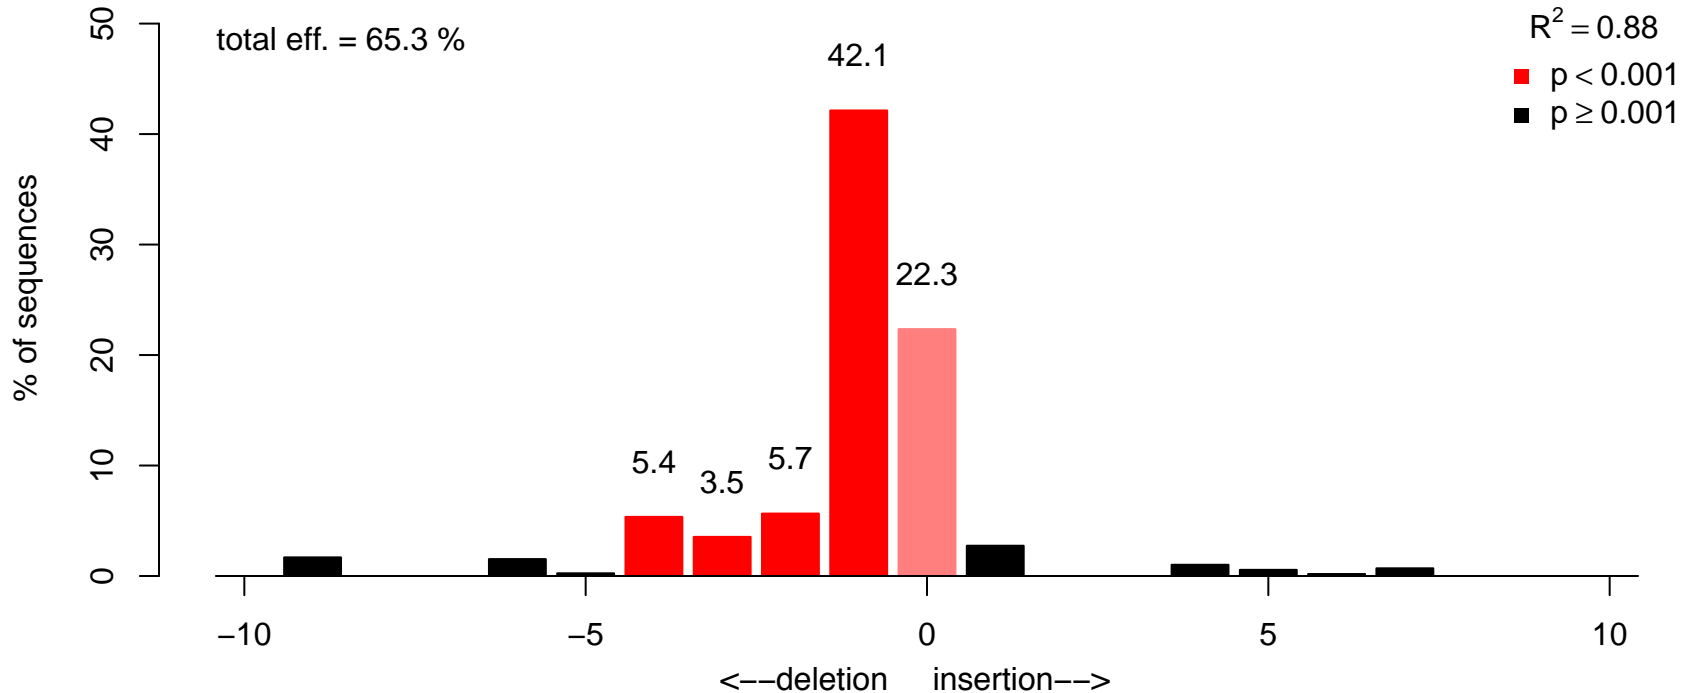

Warning: the spacing between the nucleotides in (one of) sanger sequence file(s) is not constant.

This might indicate for wrongly unannotated or wrongly additional annotated nucleotides.  
Decomposition window lower and check the chromatogram for abnormalities.

sample: Bth/WT cell line, gRNA 1.2, forward  
guide: GGGTGGGACAGAACTTCCCC

region for decomposition

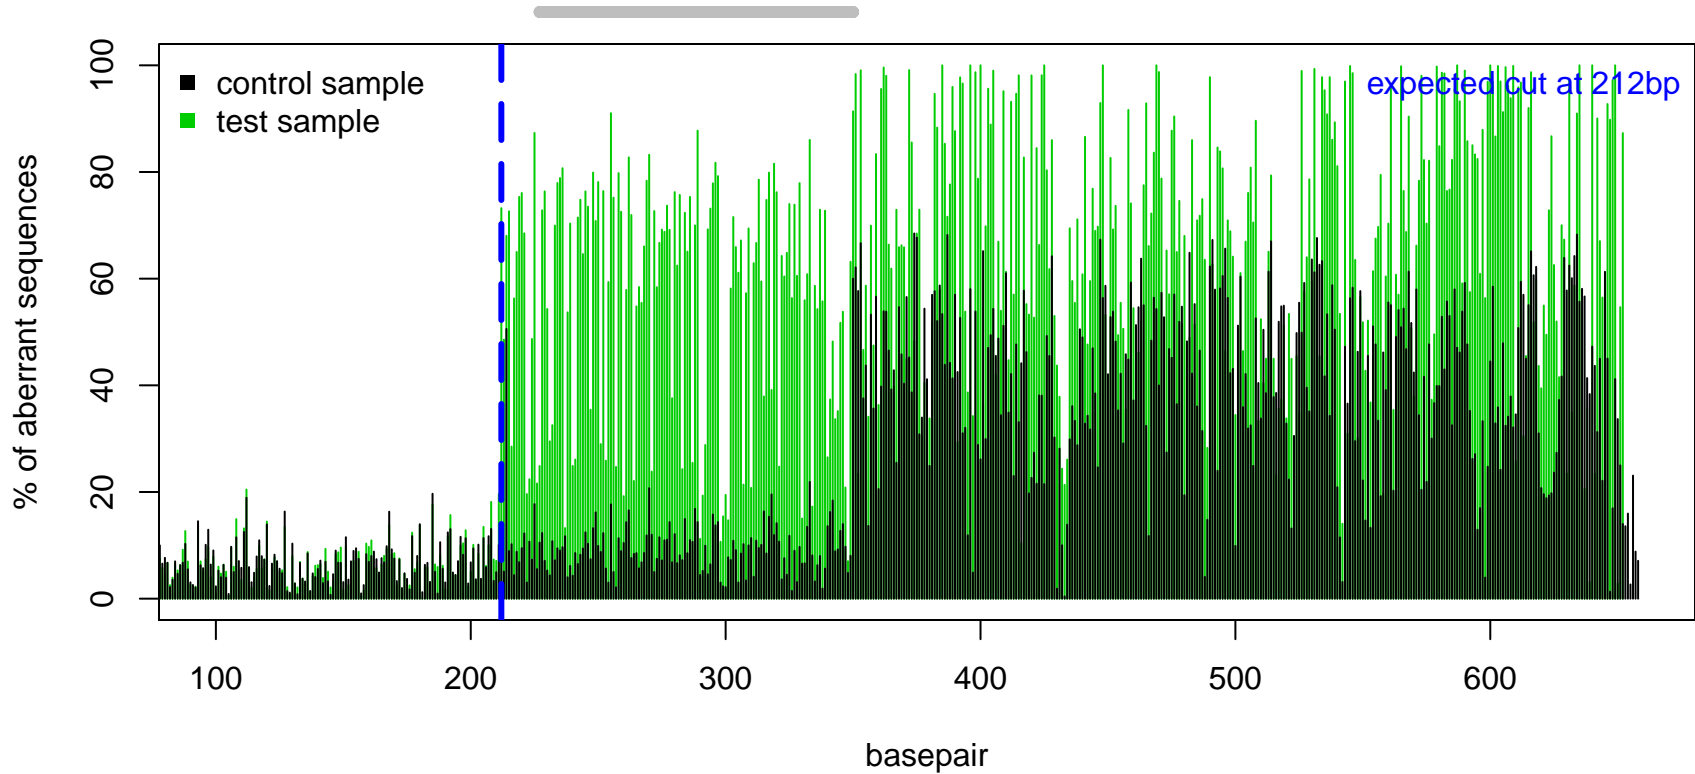

Warning: left boundary of decomposition window was adjusted 227 . It must be at least 5bp plus the maximum indel size downstream of the expected break site

sample: Bth/WT cell line, gRNA 1.3, forward  
guide: GGGTGGGACAGAACTTCCCC

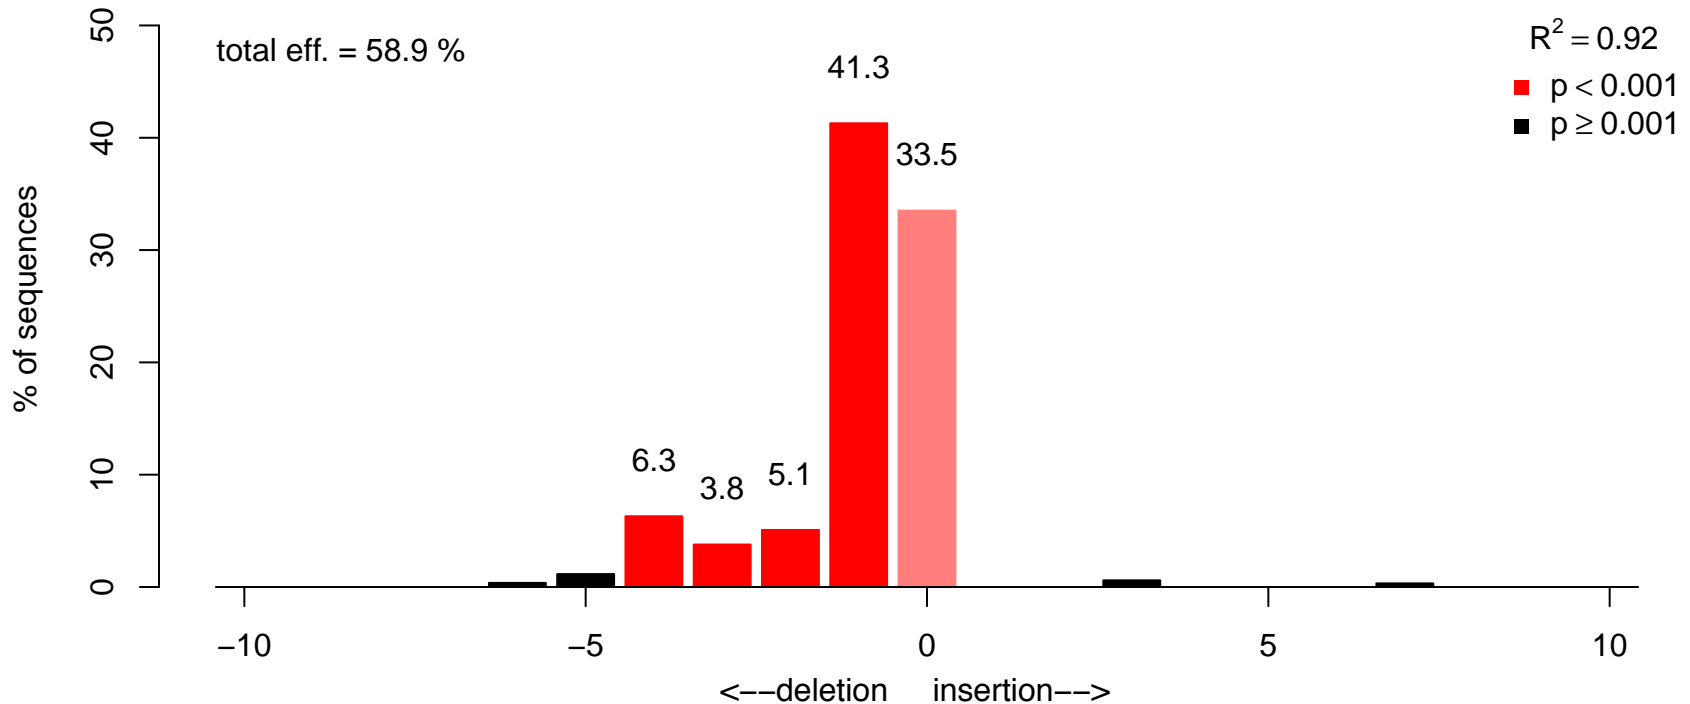

Warning: the spacing between the nucleotides in (one of) sanger sequence file(s) is not constant.

This might indicate for wrongly unannotated or wrongly additional annotated nucleotides.  
Decomposition window lower and check the chromatogram for abnormalities.

sample: Bth/WT cell line, gRNA 1.3, forward  
guide: GGGTGGGACAGAACTTCCCC

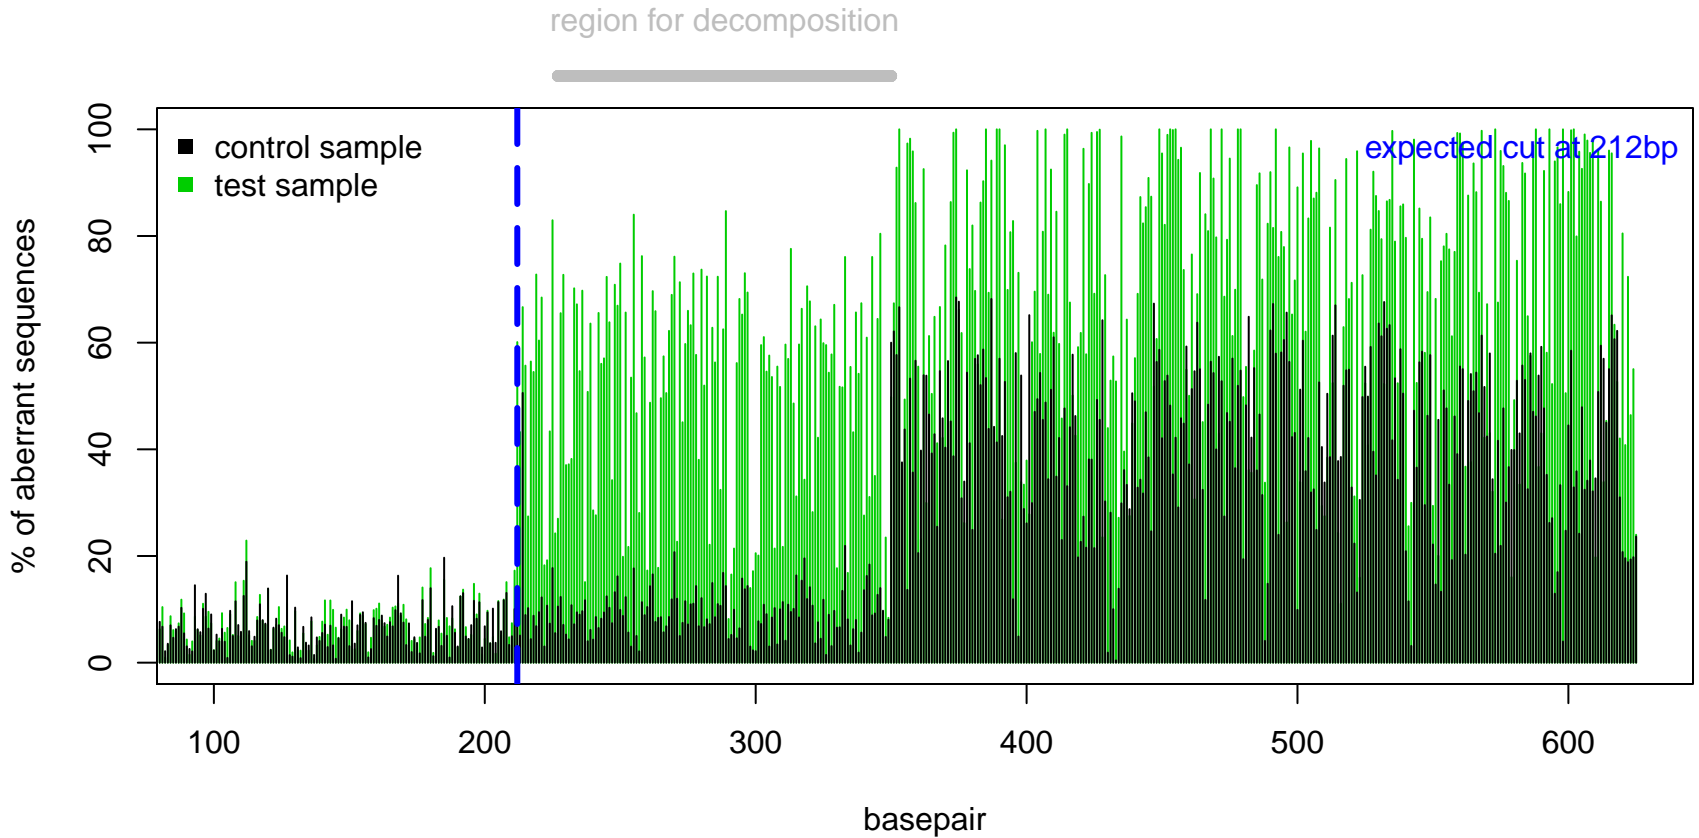

Warning: left boundary of decomposition window was adjusted 227 . It must be at least 5bp plus the maximum indel size downstream of the expected break site

sample: Bth/WT cell line, gRNA 1.4, forward  
guide: GGGTGGGACAGAACTTCCCC

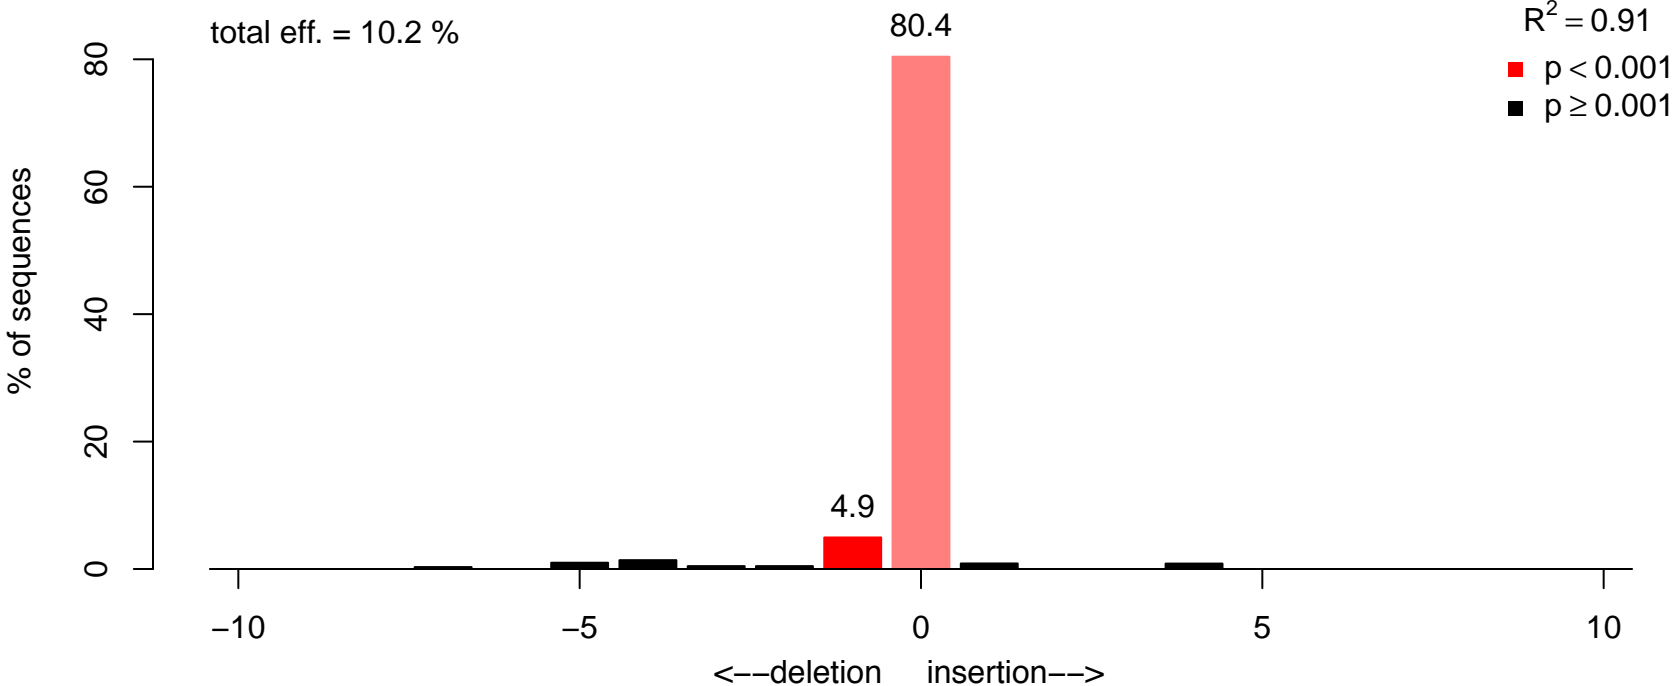

Warning: the spacing between the nucleotides in (one of) sanger sequence file(s) is not constant.  
This might indicate for wrongly unannotated or wrongly additional annotated nucleotides.  
Decomposition window lower and check the chromatogram for abnormalities.

sample: Bth/WT cell line, gRNA 1.4, forward  
guide: GGGTGGGACAGAACTTCCCC

region for decomposition

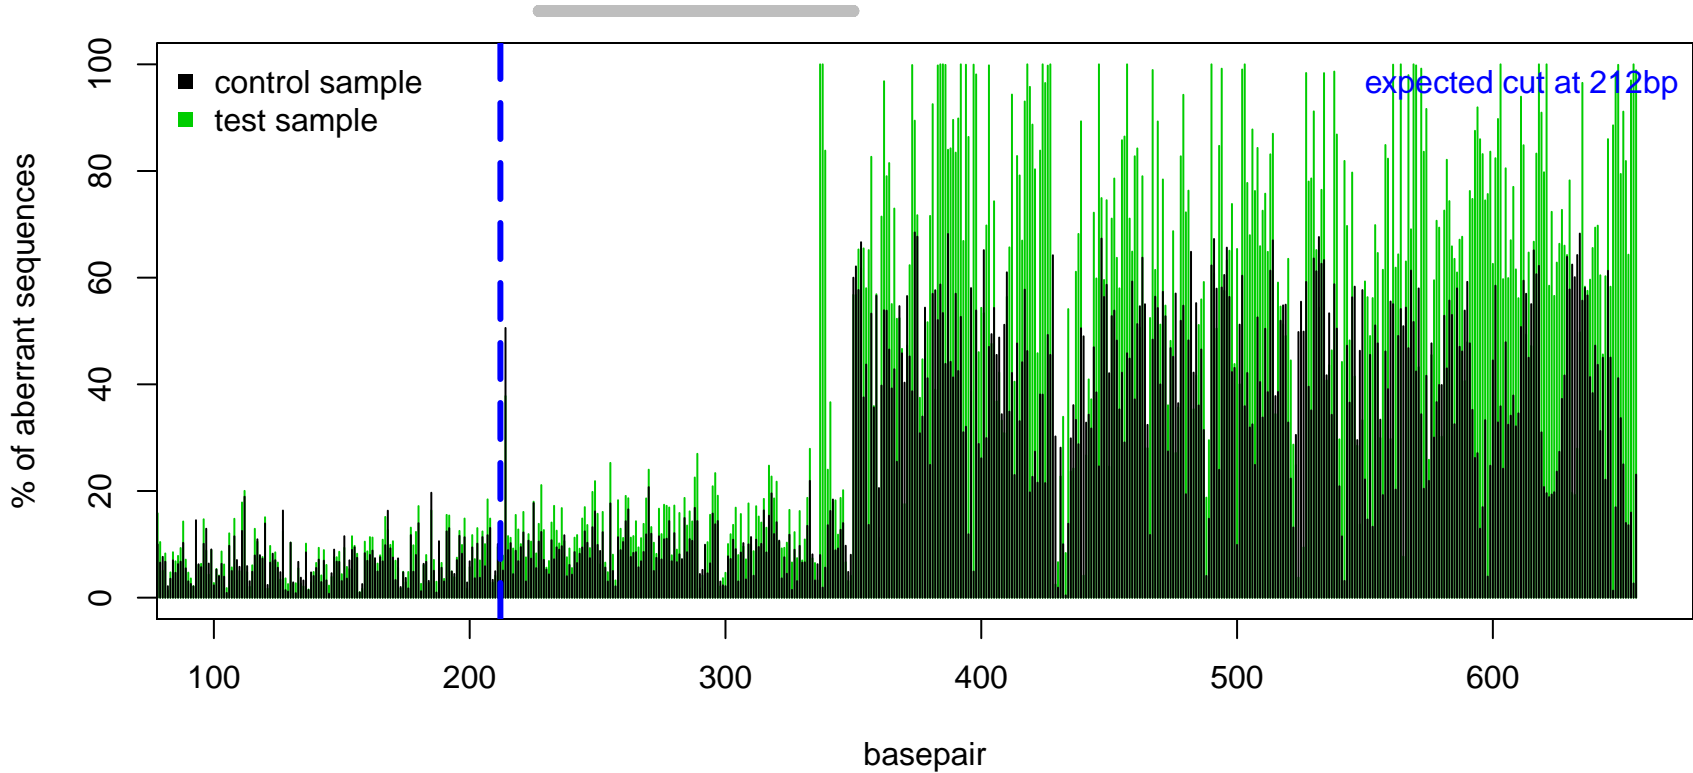

Warning: left boundary of decomposition window was adjusted 227 . It must be at least 5bp plus the maximum indel size downstream of the expected break site

sample: Bth/WT cell line, gRNA 2.1, forward  
guide: TGGGACAGAACTTCCCCAGG

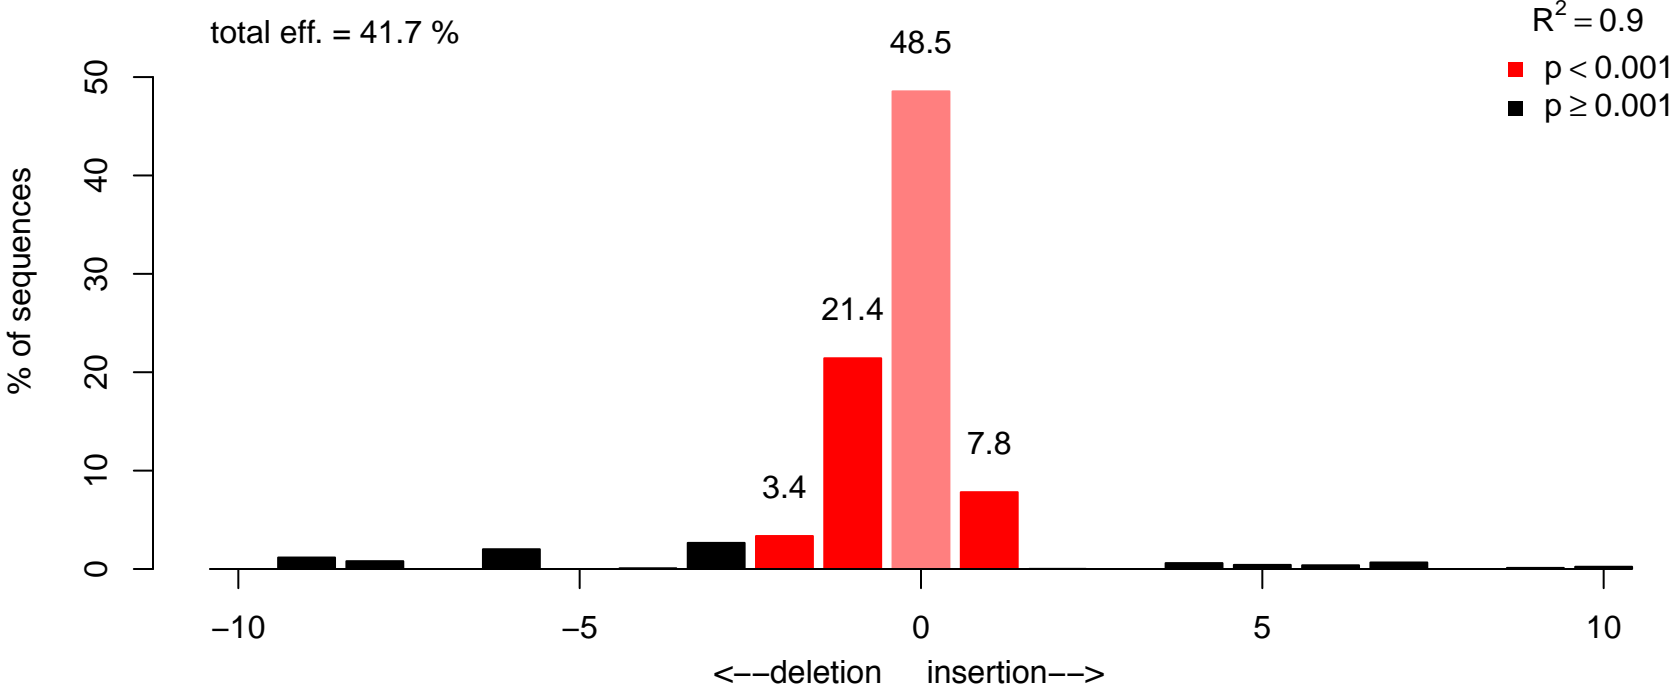

Warning: the spacing between the nucleotides in (one of) sanger sequence file(s) is not constant.  
This might indicate for wrongly unannotated or wrongly additional annotated nucleotides.  
Decomposition window lower and check the chromatogram for abnormalities.



sample: Bth/WT cell line, gRNA 2.1, forward  
guide: TGGGACAGAACTTCCCCAGG

region for decomposition

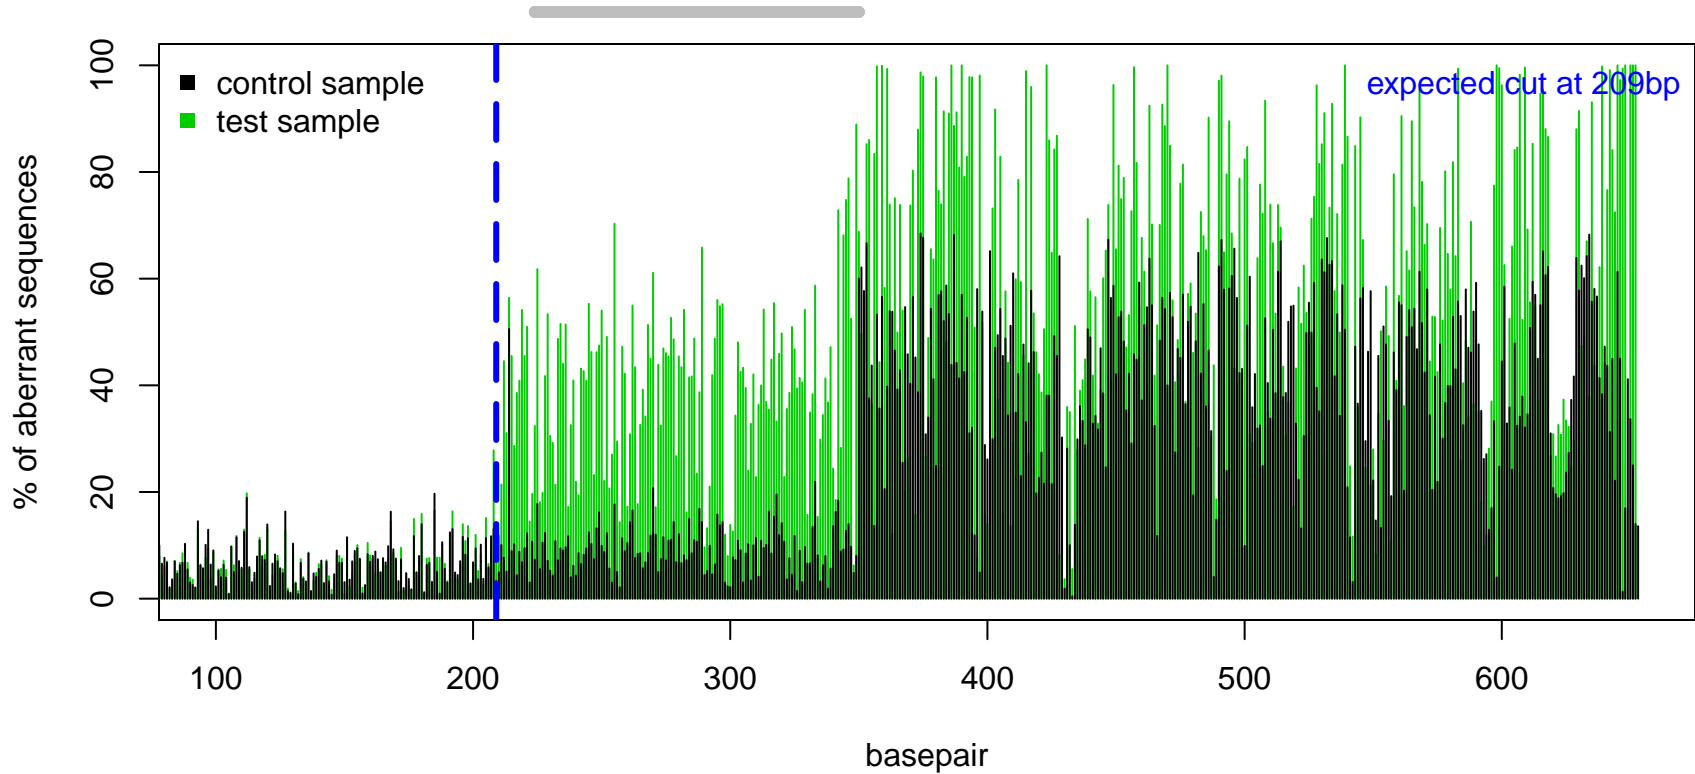

Warning: left boundary of decomposition window was adjusted 224 . It must be at least 5bp plus the maximum indel size downstream of the expected break site

sample: Bth/WT cell line, gRNA 2.2, forward  
6 guide: TGGGACAGAACTTCCCCAGG

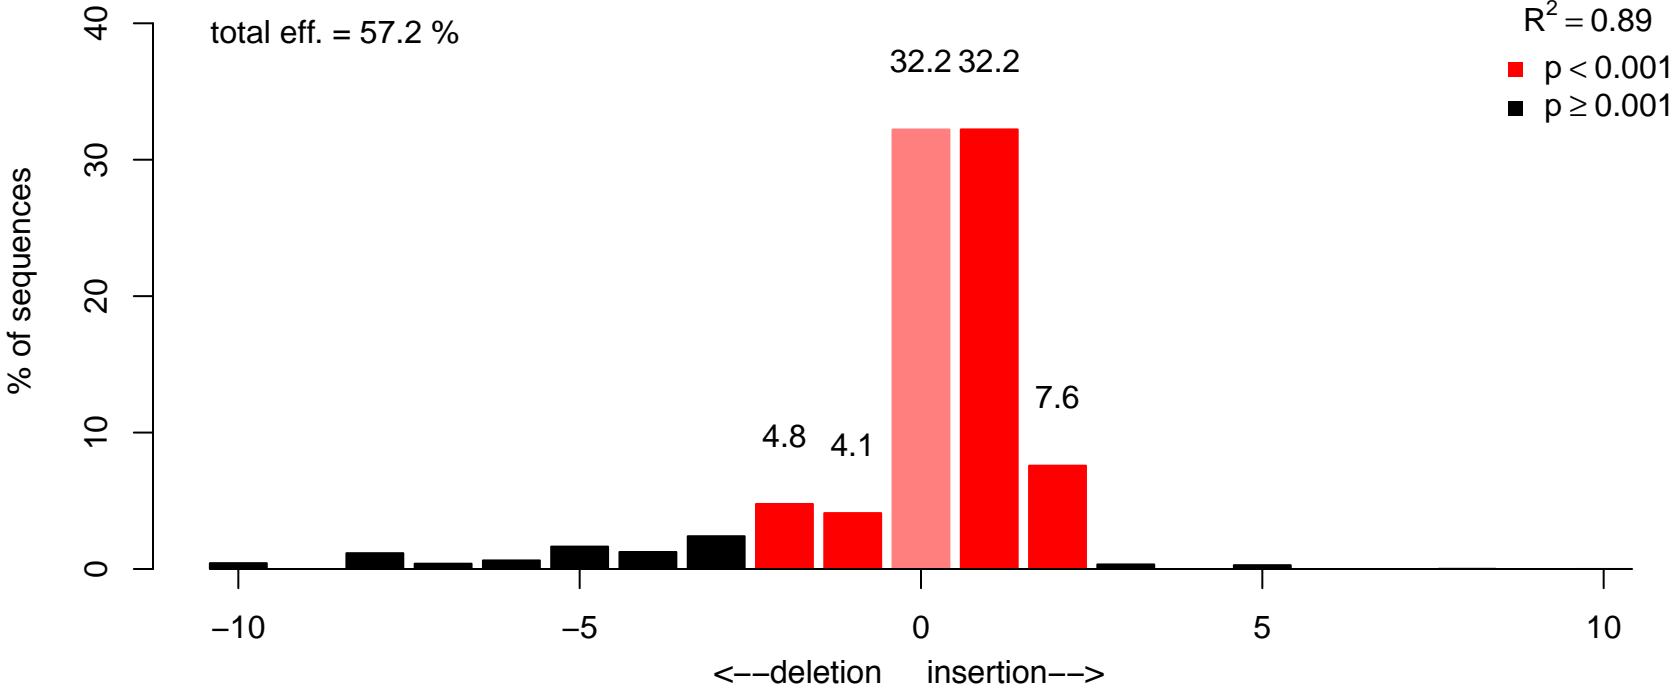

Warning: the spacing between the nucleotides in (one of) sanger sequence file(s) is not constant.  
This might indicate for wrongly unannotated or wrongly additional annotated nucleotides.  
Decomposition window lower and check the chromatogram for abnormalities.

sample: Bth/WT cell line, gRNA 2.2, forward  
guide: TGGGACAGAACTTCCCCAGG

region for decomposition

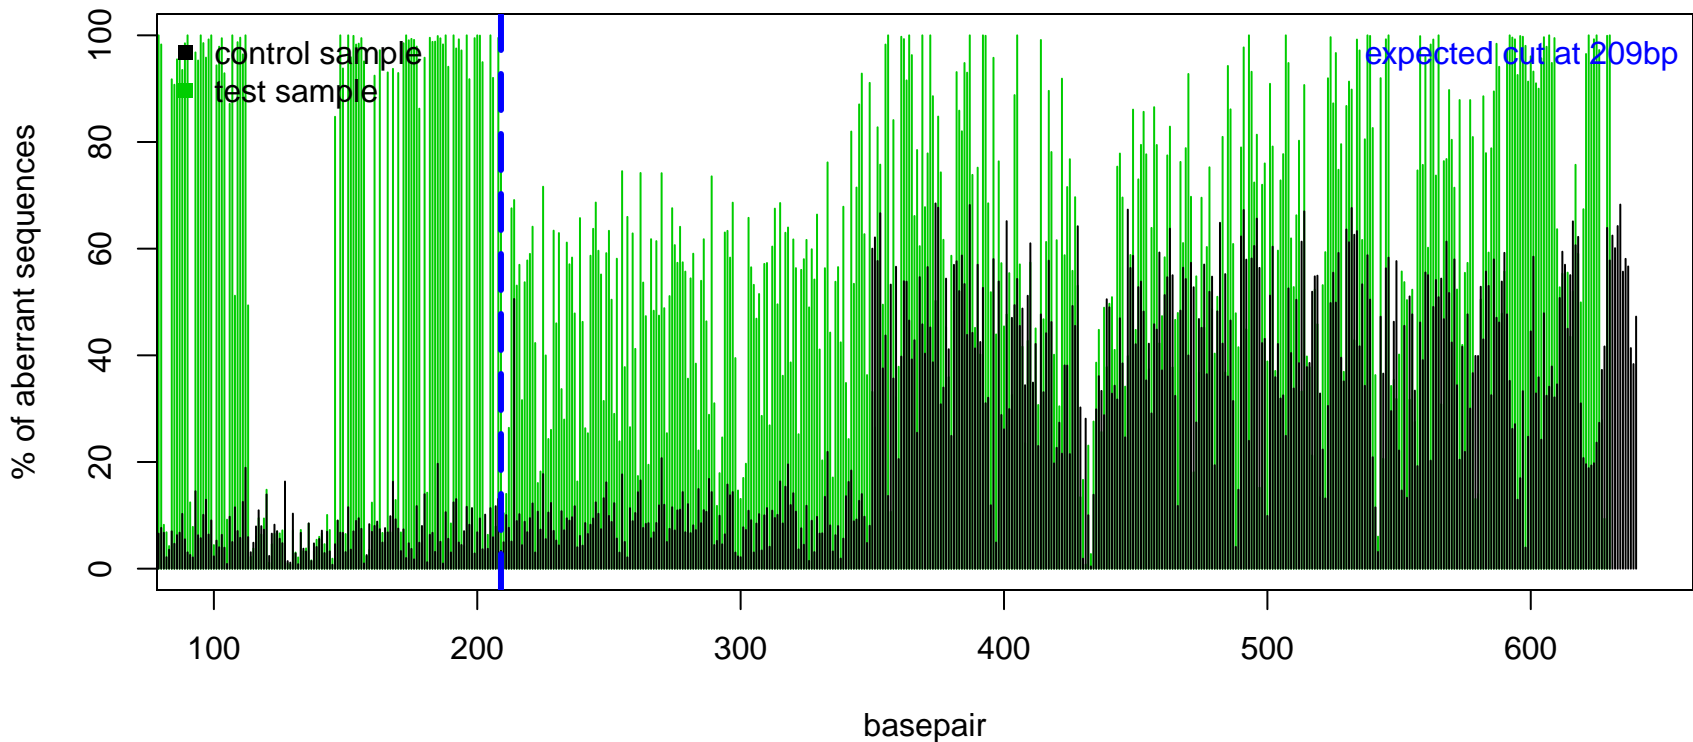

Warning: left boundary of decomposition window was adjusted 224 . It must be at least 5bp plus the maximum indel size downstream of the expected break site

sample: Bth/WT cell line, gRNA 2.3, forward  
guide: TGGGACAGAACTTCCCCAGG

total eff. = 30.6 %

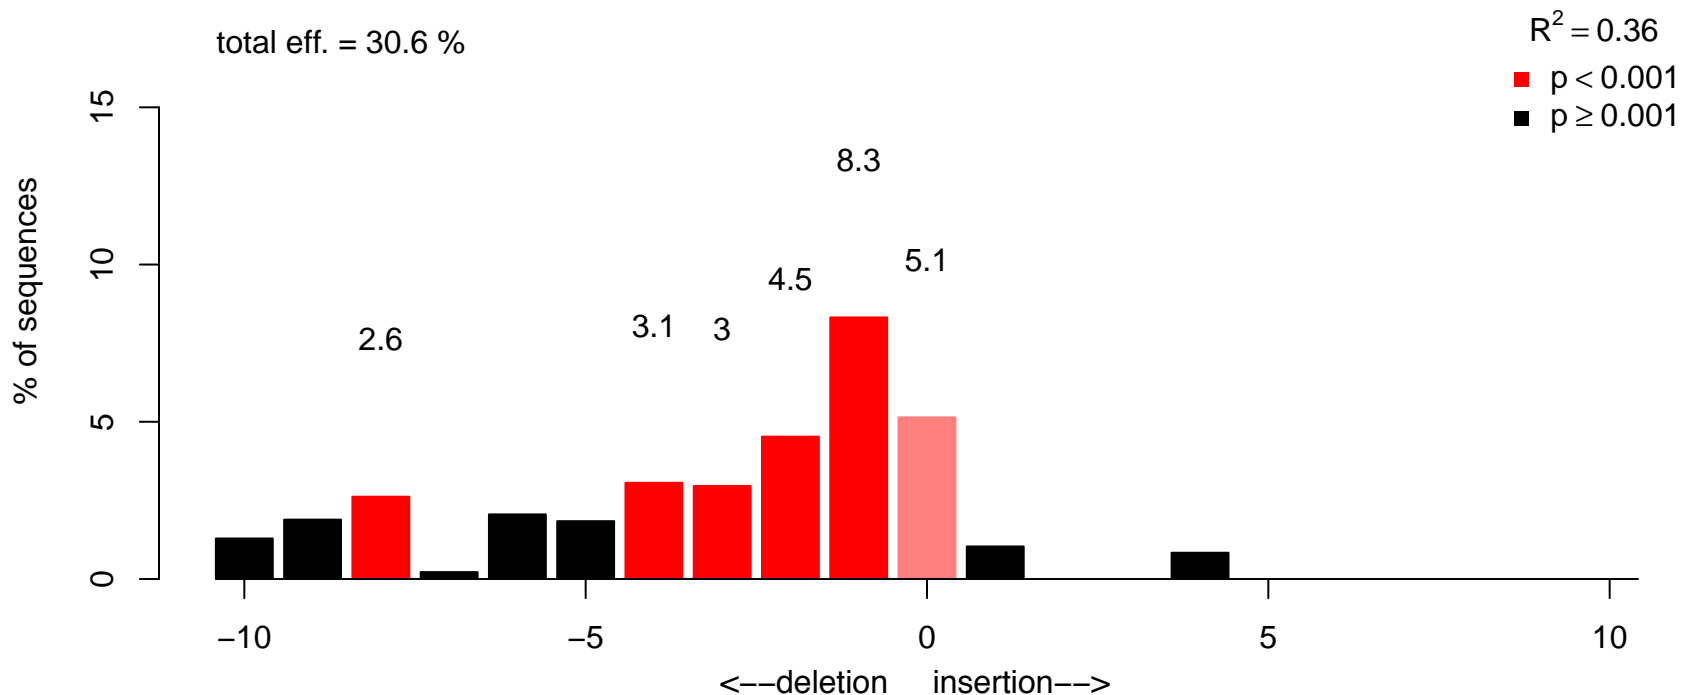

Warning: the spacing between the nucleotides in (one of) sanger sequence file(s) is not constant.

This might indicate for wrongly unannotated or wrongly additional annotated nucleotides.  
Decomposition window lower and check the chromatogram for abnormalities.

sample: Bth/WT cell line, gRNA 2.3, forward  
guide: TGGGACAGAACTTCCCCAGG

region for decomposition

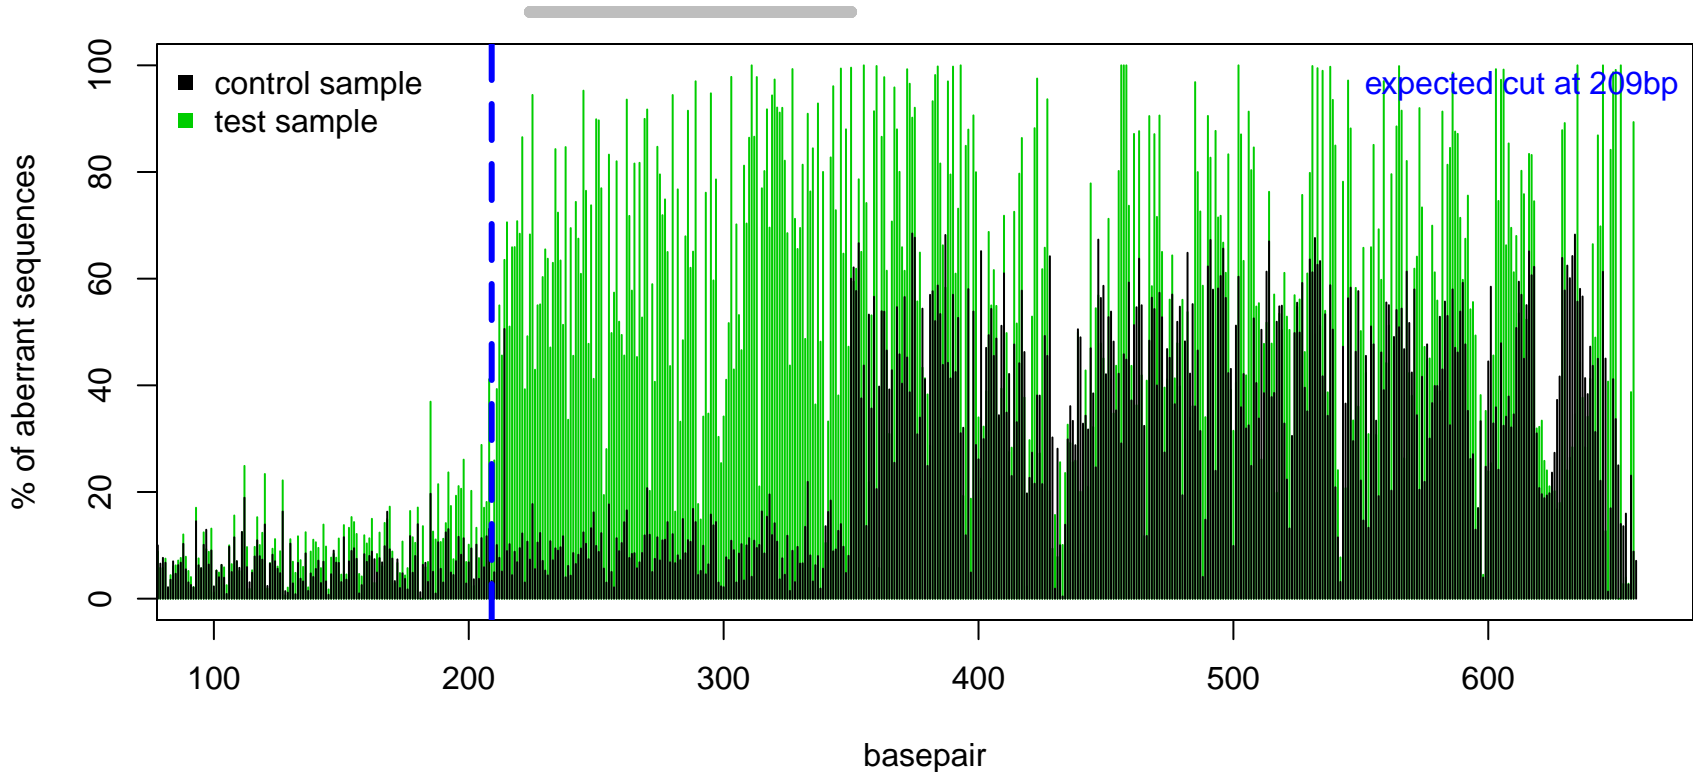

Warning: left boundary of decomposition window was adjusted 224 . It must be at least 5bp plus the maximum indel size downstream of the expected break site

sample: Bth/WT cell line, gRNA 2.4, forward  
guide: TGGGACAGAACTTCCCCAGG

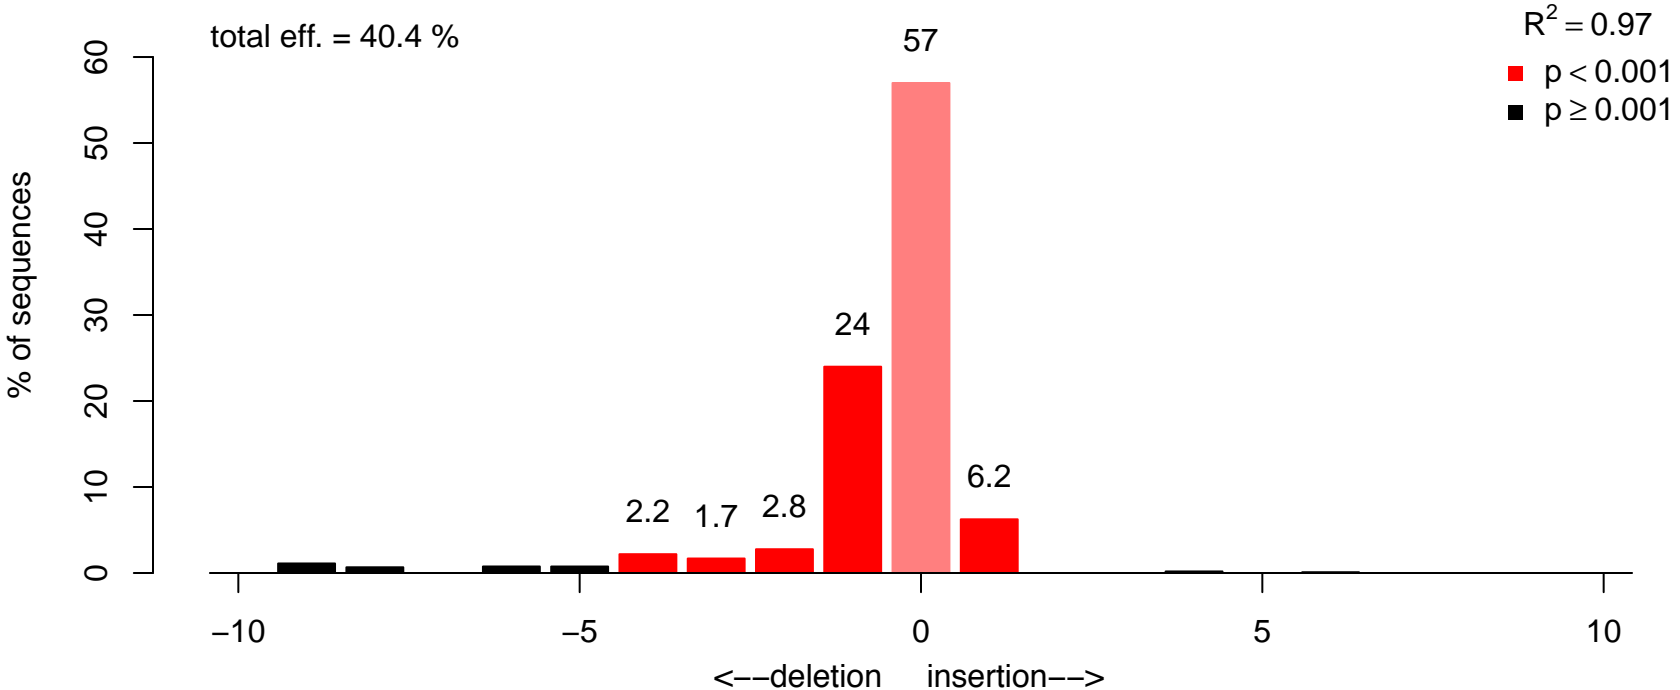

Warning: the spacing between the nucleotides in (one of) sanger sequence file(s) is not constant.

This might indicate for wrongly unannotated or wrongly additional annotated nucleotides.  
Decomposition window lower and check the chromatogram for abnormalities.

sample: Bth/WT cell line, gRNA 2.4, forward  
guide: TGGGACAGAACTTCCCCAGG

region for decomposition

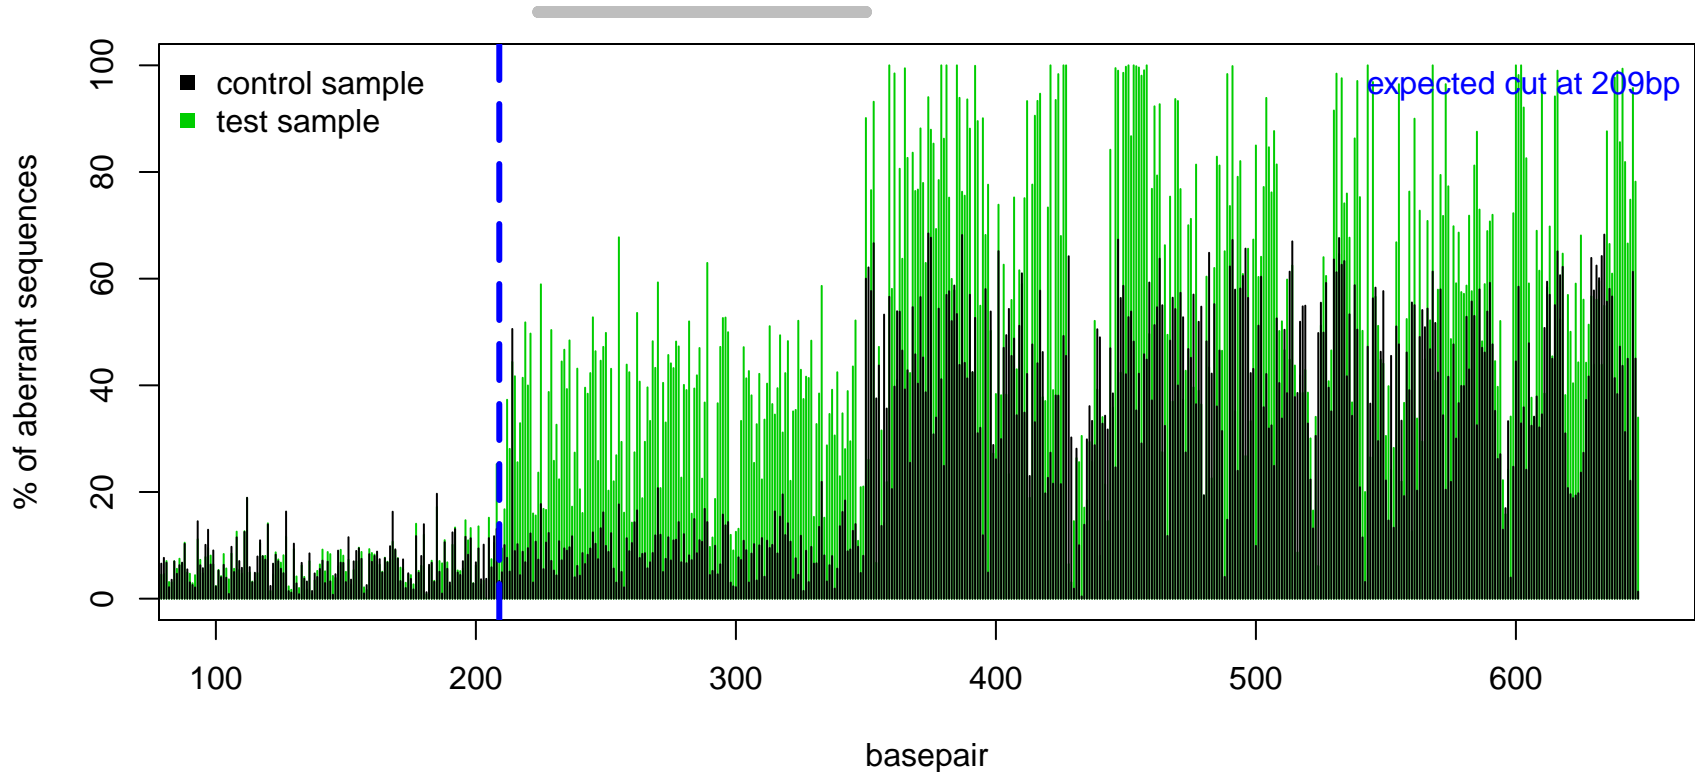

Warning: left boundary of decomposition window was adjusted 224 . It must be at least 5bp plus the maximum indel size downstream of the expected break site

sample: Bth/WT cell line, gRNA 3.1, forward  
guide: TGGTAATGTCCCTCCTGGGG

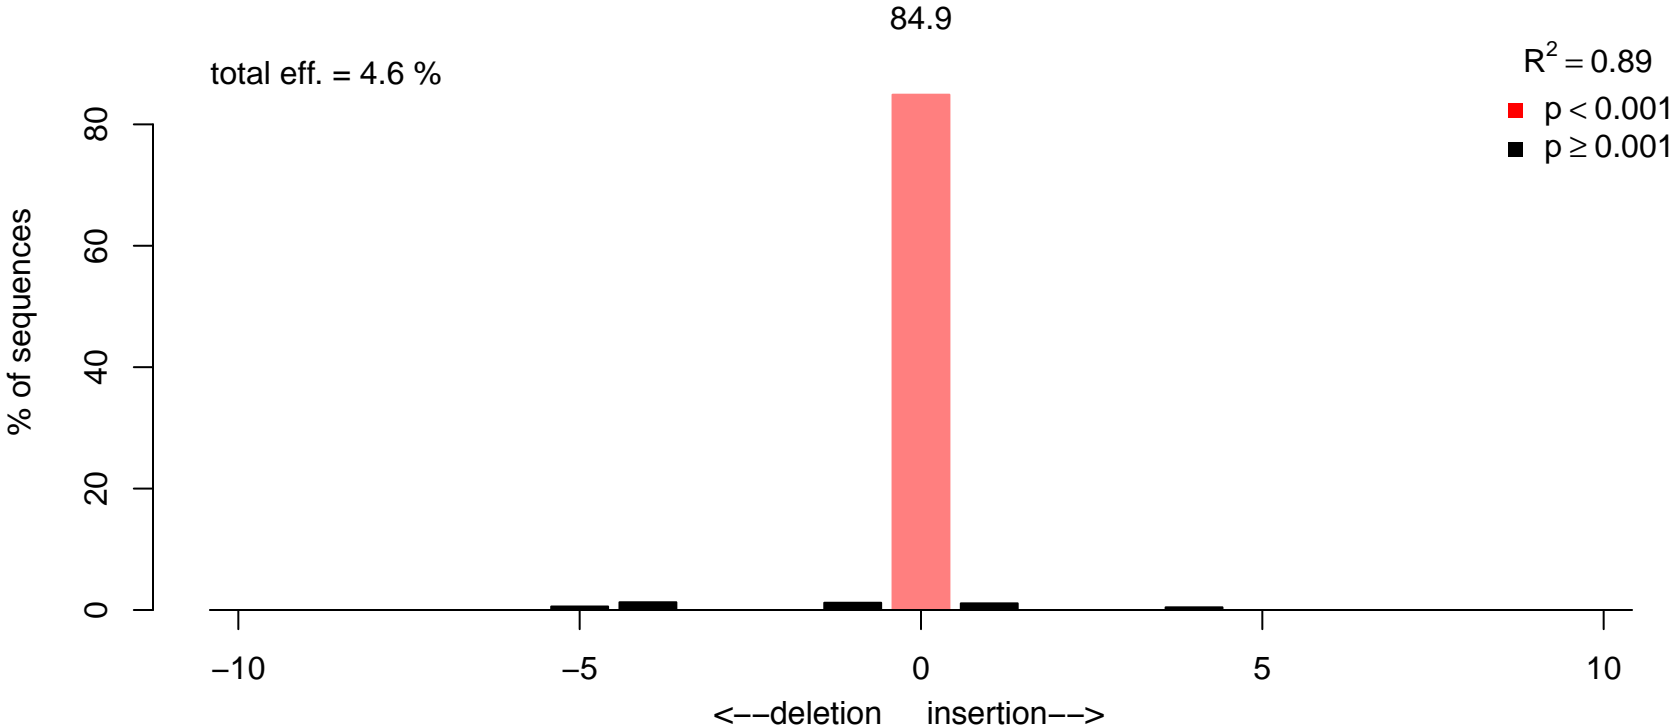

Warning: the spacing between the nucleotides in (one of) sanger sequence file(s) is not constant.  
This might indicate for wrongly unannotated or wrongly additional annotated nucleotides.  
Decomposition window lower and check the chromatogram for abnormalities.



sample: Bth/WT cell line, gRNA 3.1, forward  
guide: TGGTAATGTCCCTCCTGGGG

region for decomposition

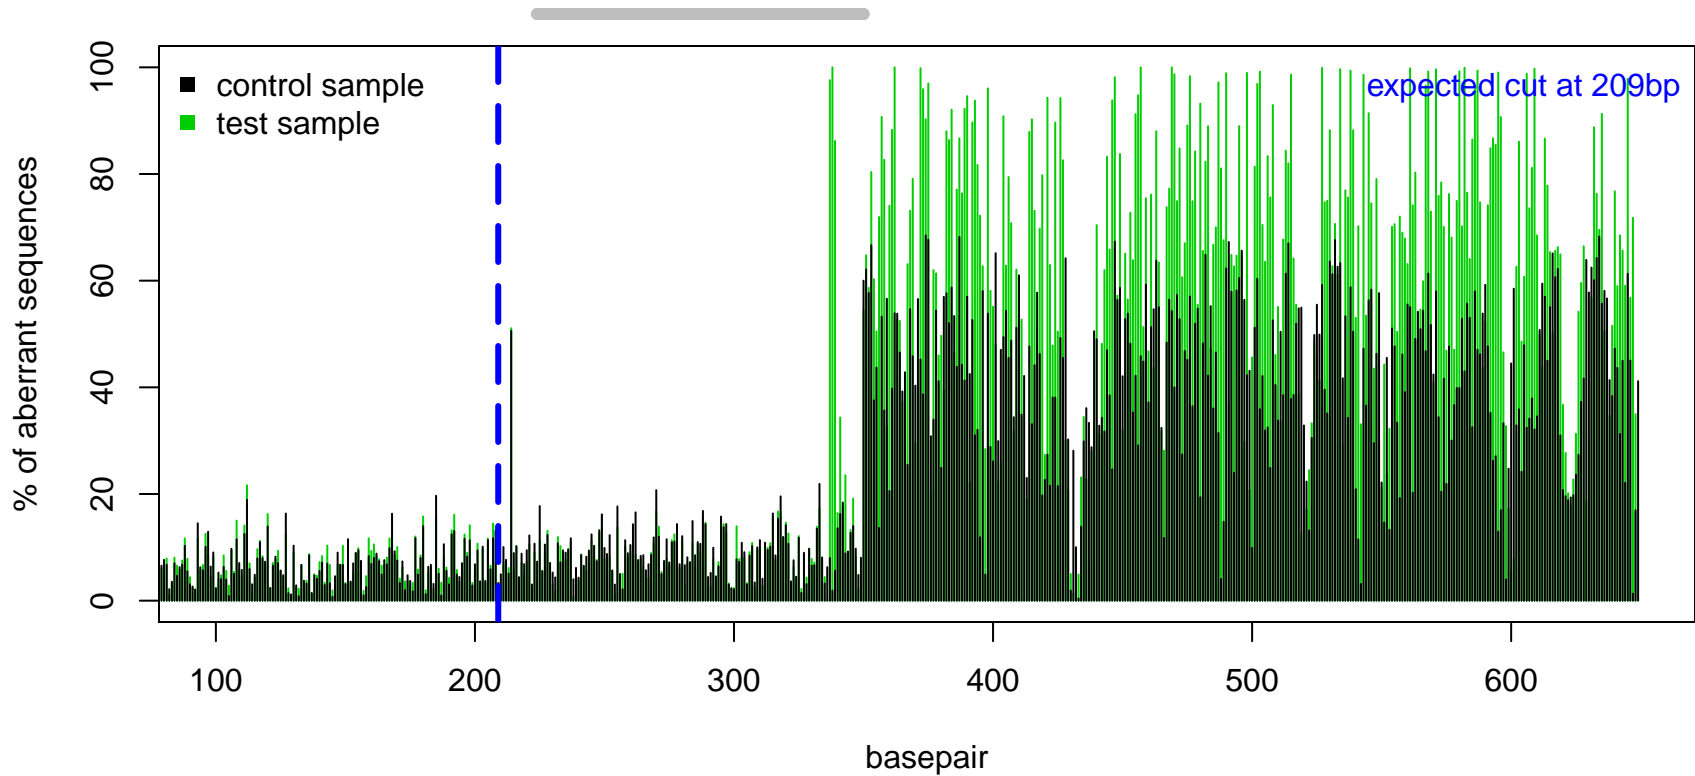

Warning: left boundary of decomposition window was adjusted 224 . It must be at least 5bp plus the maximum indel size downstream of the expected break site

sample: Bth/WT cell line, gRNA 3.2, forward  
guide: TGGTAATGTCCCTCCTGGGG

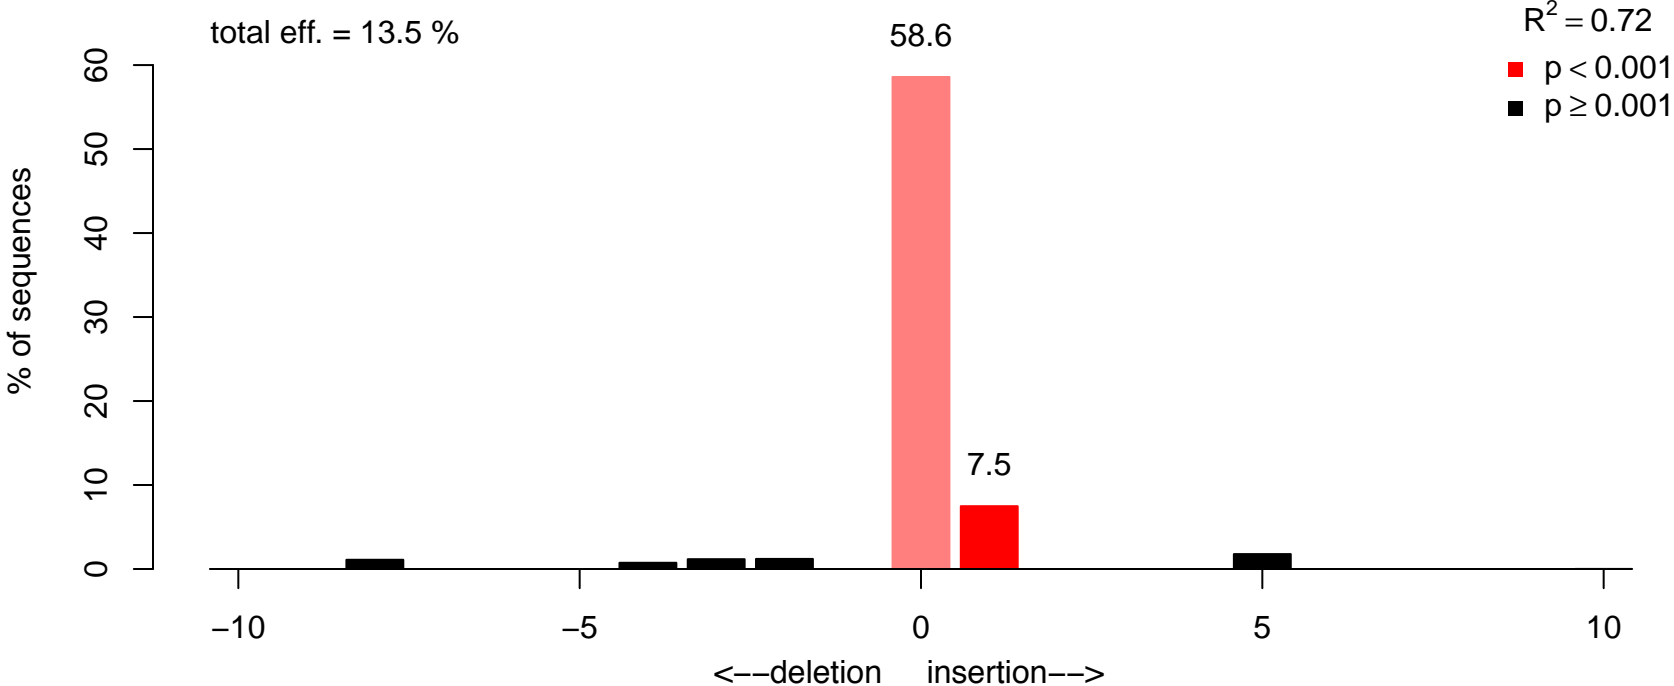

Warning: the spacing between the nucleotides in (one of) sanger sequence file(s) is not constant.  
This might indicate for wrongly unannotated or wrongly additional annotated nucleotides.  
Decomposition window lower and check the chromatogram for abnormalities.

sample: Bth/WT cell line, gRNA 3.2, forward  
guide: TGGTAATGTCCCTCCTGGGG

region for decomposition

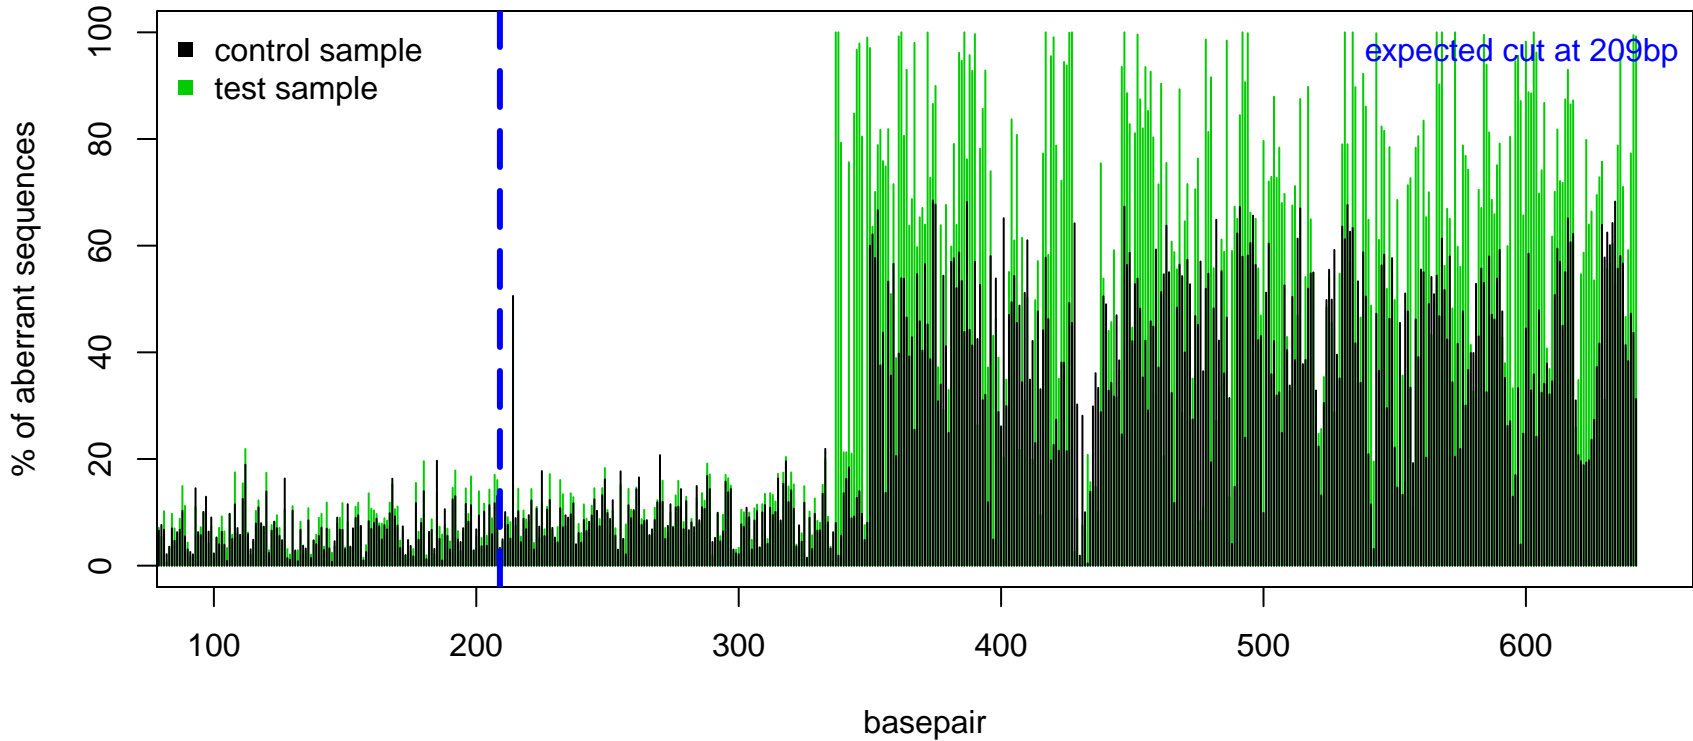

Warning: left boundary of decomposition window was adjusted 224 . It must be at least 5bp plus the maximum indel size downstream of the expected break site

sample: Bth/WT cell line, gRNA 3.3, forward  
guide: TGGTAATGTCCCTCCTGGGG

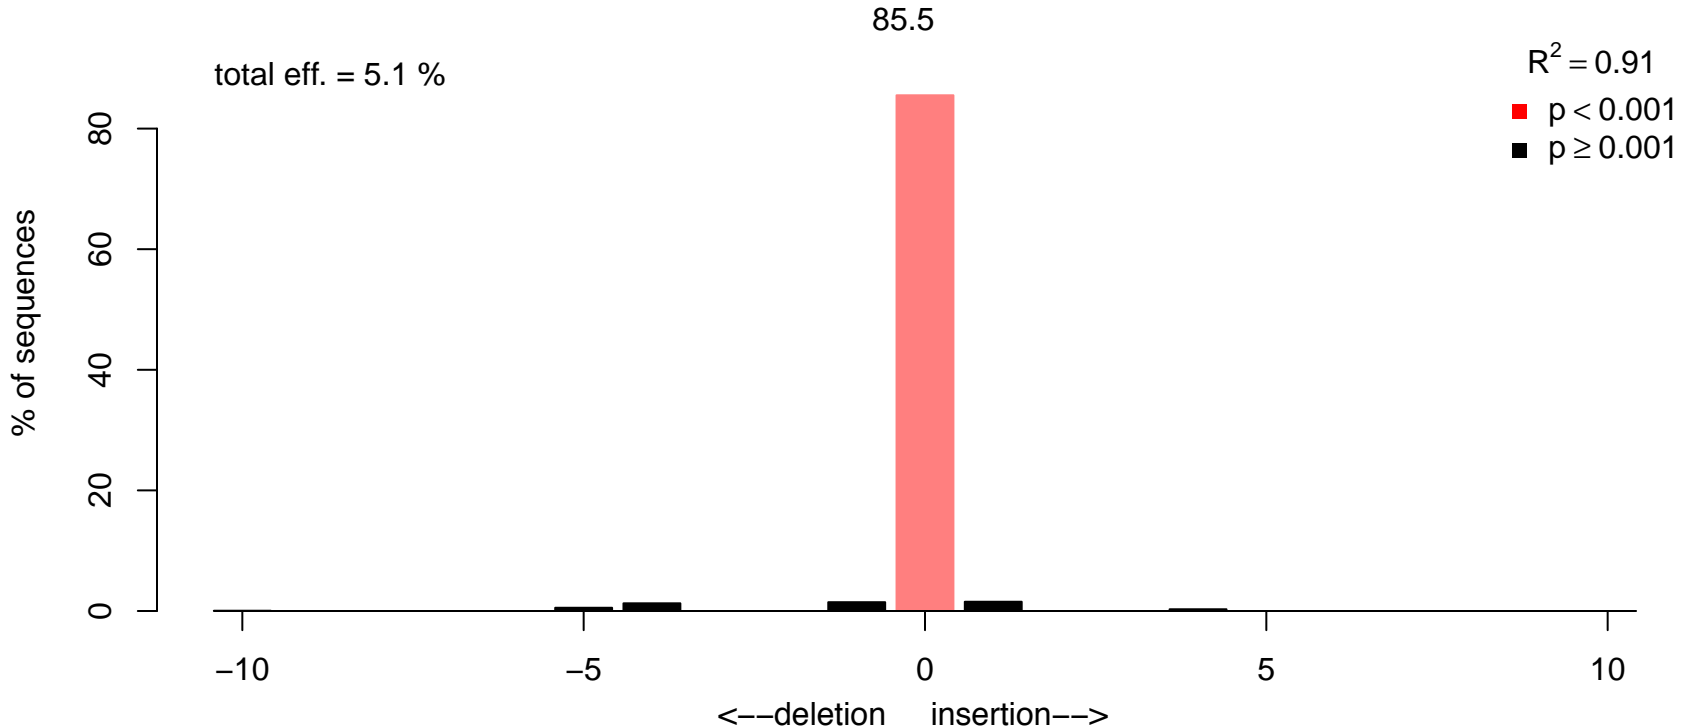

Warning: the spacing between the nucleotides in (one of) sanger sequence file(s) is not constant.

This might indicate for wrongly unannotated or wrongly additional annotated nucleotides.  
Decomposition window lower and check the chromatogram for abnormalities.

sample: Bth/WT cell line, gRNA 3.3, forward  
guide: TGGTAATGTCCCTCCTGGGG

region for decomposition

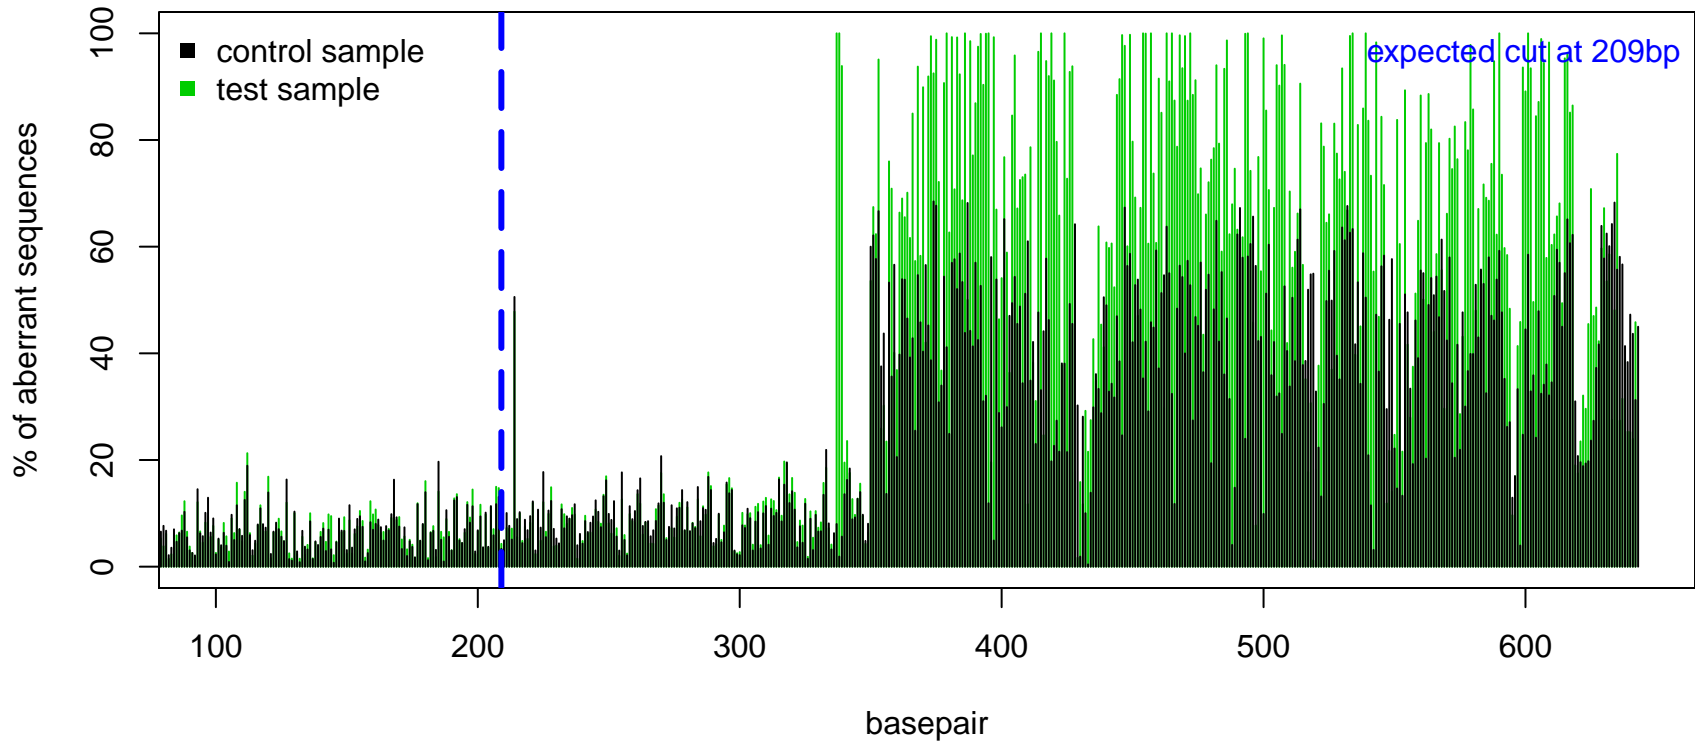

Warning: left boundary of decomposition window was adjusted 224 . It must be at least 5bp plus the maximum indel size downstream of the expected break site

# *Tmc1*<sup>Bth/WT</sup>, SpCas9 only, Bth allele only

- bold** Substitutions
- Insertions
- Deletions
- - -** Predicted cleavage position

A T G G T A A T G T C C C T C C T G G G G A A G T T C T G T C C C A C C C T G T Reference

A T G G T A A T G T C C C T C C T G G G G **G** A A G T T C T G T C C C A C C C T G T 98.27% (129057 reads)

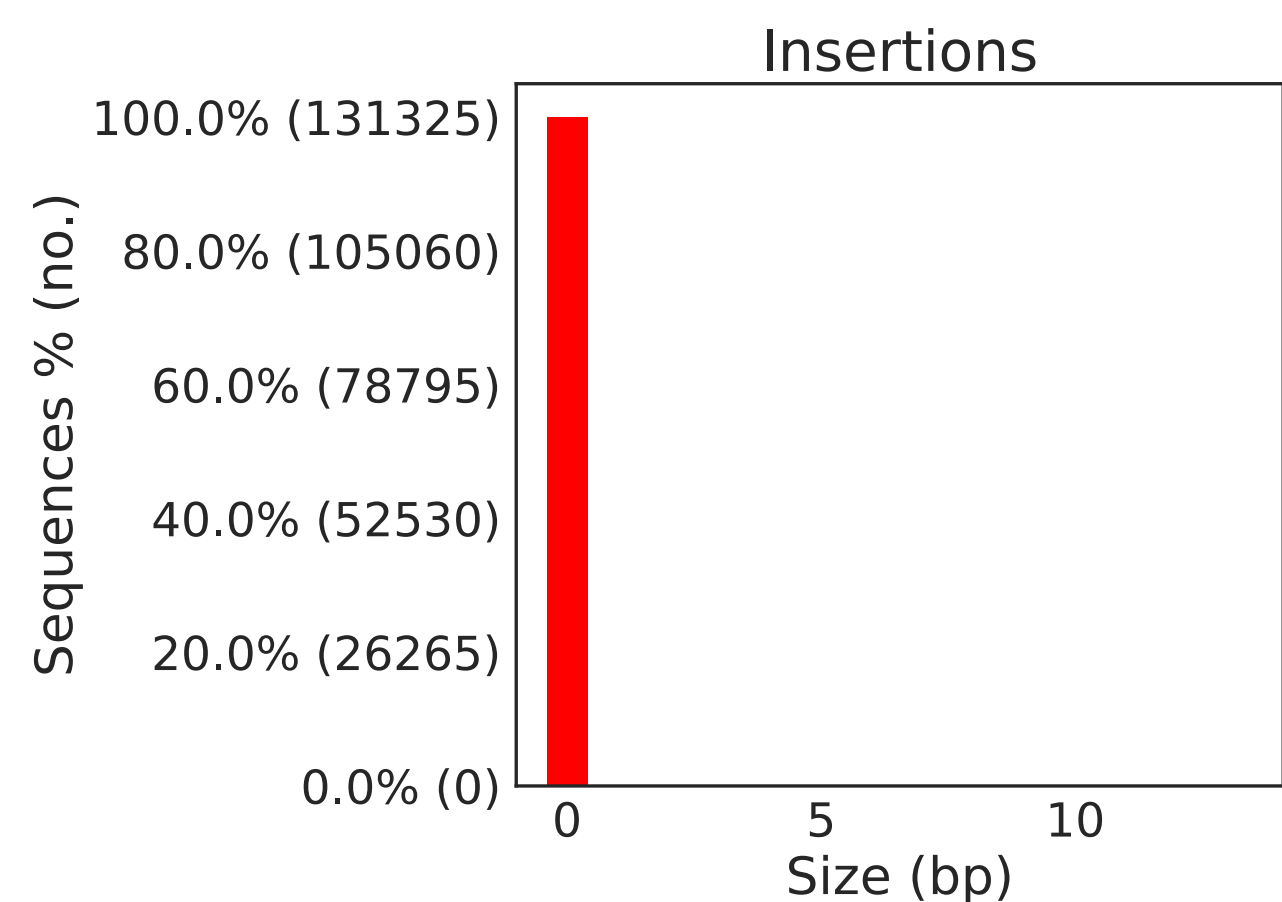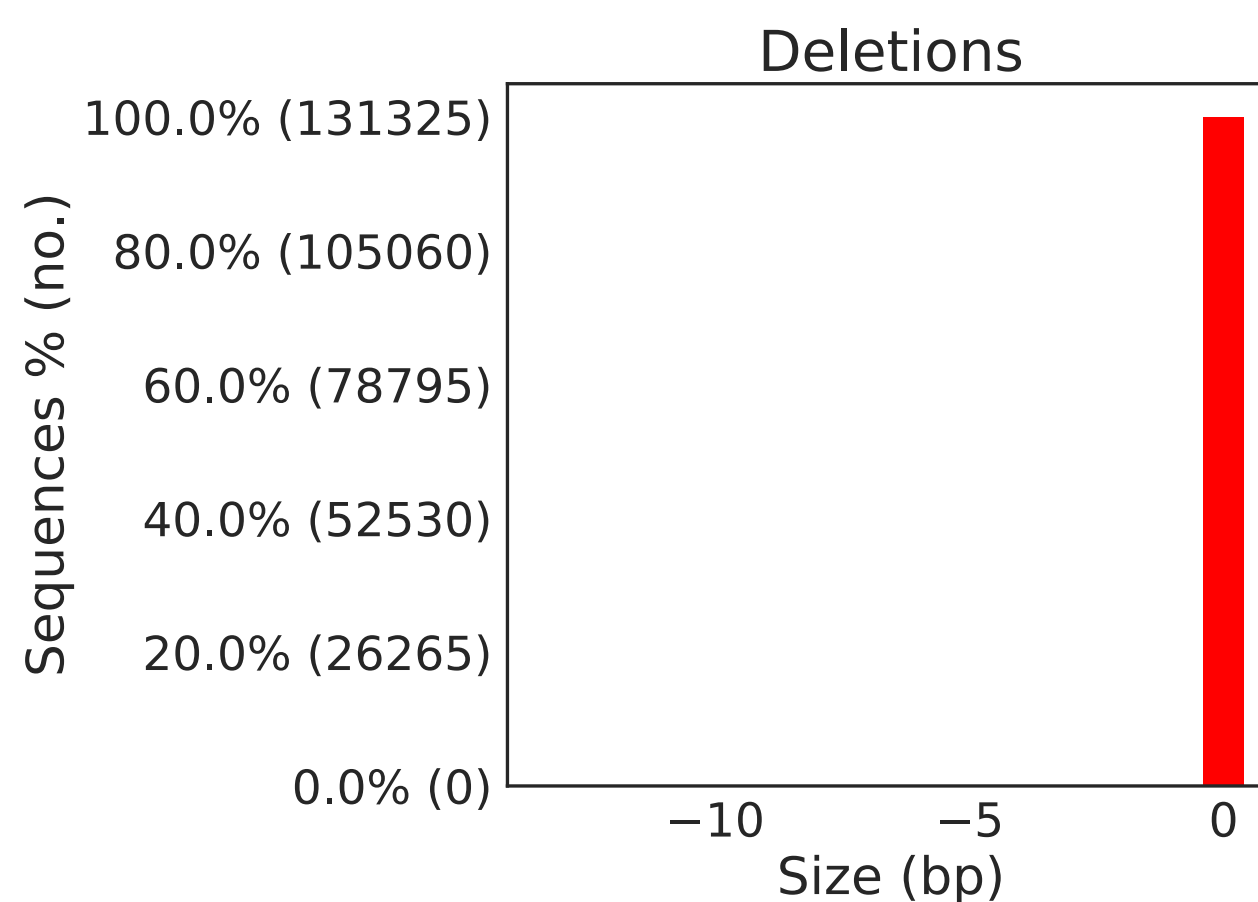

— Insertion  
— Non-insertion

— Deletion  
— Non-deletion

# *Tmc1*<sup>Bth/WT</sup>, SpCas9 only, WT allele only

**bold** Substitutions  
 Insertions  
 - Deletions  
 - - - Predicted cleavage position

A T G G T A A T G T C C C T C C T G G G G A A G T T C T G T C C C A C C C T G T Reference  
 A T G G T A A T G T C C C T C C T G G G **G** A T G T T C T G T C C C A C C C T G T 98.43% (129478 reads)

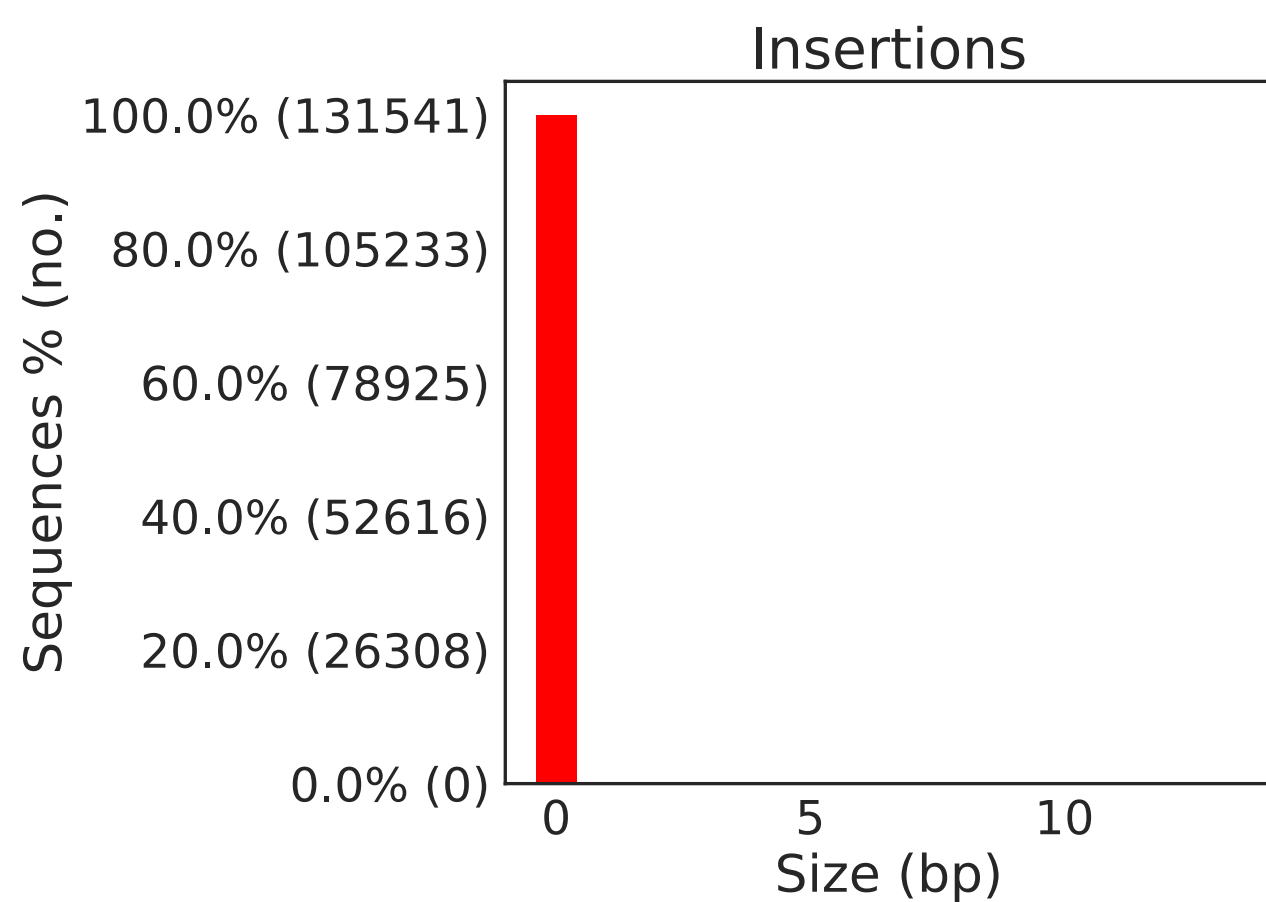

— Insertion  
— Non-insertion

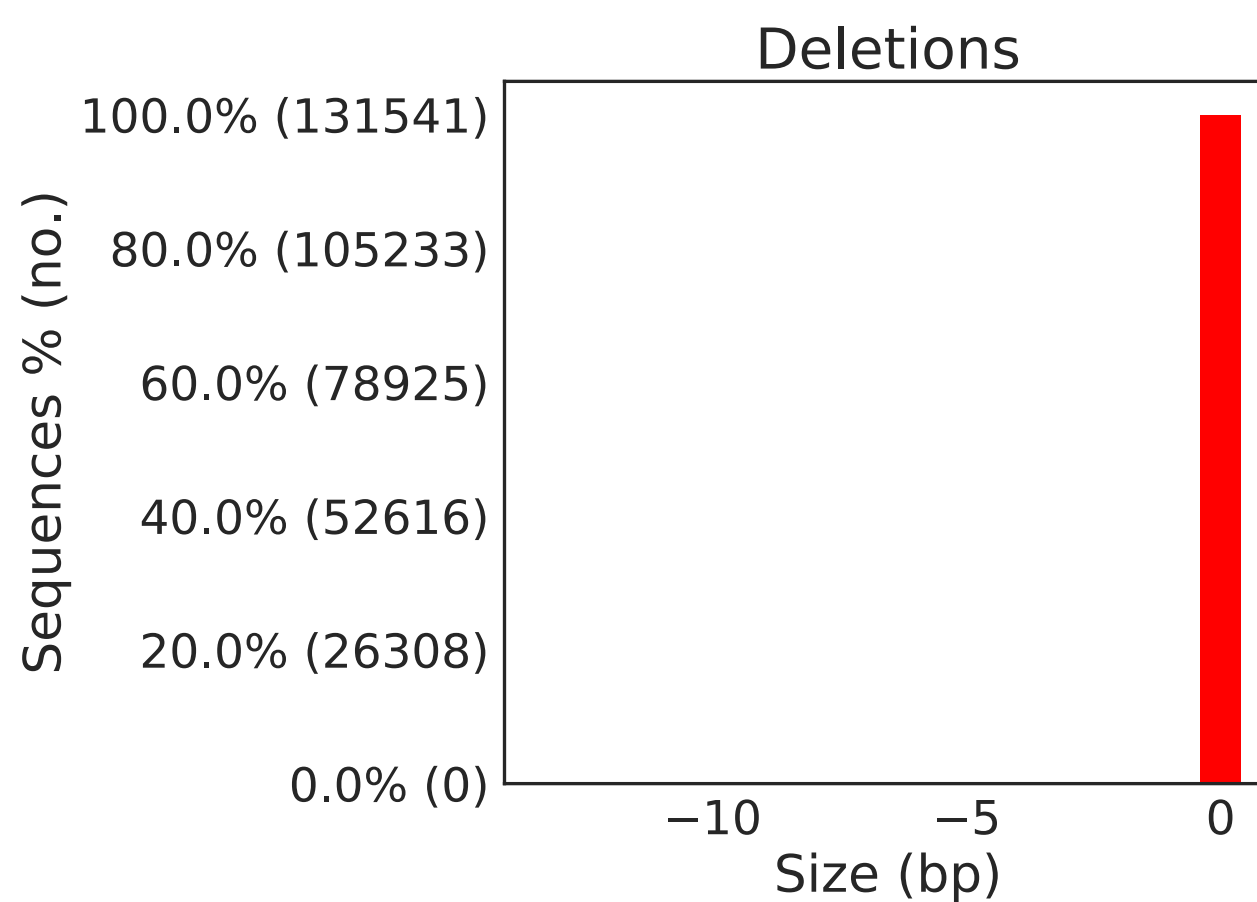

— Deletion  
— Non-deletion

# *Tmc1*<sup>Bth/WT</sup>, SpCas9 + gRNA 1.1, Bth allele only

**bold** Substitutions  
  Insertions  
 - Deletions  
 - - - Predicted cleavage position

| Reference |   |          |   |          |   |   |   |   |   |   |   |          |   |   |   |   |   |   |   |          |          |          |          |          |          |          |          |          |          |          |          |          |          |          |          |          |          |          |          |                      |                      |                   |
|-----------|---|----------|---|----------|---|---|---|---|---|---|---|----------|---|---|---|---|---|---|---|----------|----------|----------|----------|----------|----------|----------|----------|----------|----------|----------|----------|----------|----------|----------|----------|----------|----------|----------|----------|----------------------|----------------------|-------------------|
| A         | T | G        | G | T        | A | A | T | G | T | C | C | C        | T | C | C | T | G | G | G | G        | A        | A        | G        | T        | T        | C        | T        | G        | T        | C        | C        | C        | A        | C        | C        | C        | T        | G        | T        | 23.21% (14481 reads) |                      |                   |
| A         | T | G        | G | T        | A | A | T | G | T | C | C | C        | T | C | C | T | G | G | G | I        | -        | A        | A        | G        | T        | T        | C        | T        | G        | T        | C        | C        | C        | A        | C        | C        | C        | T        | G        | T                    | 23.08% (14400 reads) |                   |
| A         | T | G        | G | T        | A | A | T | G | T | C | C | C        | T | C | C | T | G | G | G | G        | A        | A        | G        | T        | T        | C        | T        | G        | T        | C        | C        | C        | A        | C        | C        | C        | T        | G        | T        | 22.84% (14253 reads) |                      |                   |
| A         | T | G        | G | T        | A | A | T | G | T | C | C | C        | T | C | C | T | G | G | G | -        | -        | A        | A        | G        | T        | T        | C        | T        | G        | T        | C        | C        | C        | A        | C        | C        | C        | T        | G        | T                    | 14.59% (9101 reads)  |                   |
| A         | T | G        | G | T        | A | A | T | G | T | C | C | C        | T | C | C | - | - | - | - | G        | A        | A        | G        | T        | T        | C        | T        | G        | T        | C        | C        | C        | A        | C        | C        | C        | T        | G        | T        | 2.65% (1656 reads)   |                      |                   |
| A         | T | G        | G | T        | A | A | T | G | T | C | C | C        | T | C | C | T | G | G | - | -        | A        | A        | G        | T        | T        | C        | T        | G        | T        | C        | C        | C        | A        | C        | C        | C        | T        | G        | T        | 1.26% (786 reads)    |                      |                   |
| A         | T | G        | G | T        | A | A | T | G | T | C | C | C        | T | C | C | T | - | - | G | G        | A        | A        | G        | T        | T        | C        | T        | G        | T        | C        | C        | C        | A        | C        | C        | C        | T        | G        | T        | 1.16% (723 reads)    |                      |                   |
| A         | T | G        | G | T        | A | A | T | G | T | C | C | C        | T | C | C | T | G | G | G | <b>A</b> | G        | A        | A        | G        | T        | T        | C        | T        | G        | T        | C        | C        | C        | A        | C        | C        | C        | T        | G        | T                    | 0.78% (488 reads)    |                   |
| A         | T | G        | G | T        | A | A | T | G | T | C | C | C        | T | C | C | T | - | - | - | -        | A        | A        | G        | T        | T        | C        | T        | G        | T        | C        | C        | C        | A        | C        | C        | C        | T        | G        | T        | 0.72% (448 reads)    |                      |                   |
| A         | T | G        | G | T        | A | A | T | G | T | C | C | C        | T | C | - | - | - | - | - | G        | A        | A        | G        | T        | T        | C        | T        | G        | T        | C        | C        | C        | A        | C        | C        | C        | T        | G        | T        | 0.65% (404 reads)    |                      |                   |
| A         | T | G        | G | T        | A | A | T | G | T | C | C | C        | T | C | C | - | - | - | G | G        | A        | A        | G        | T        | T        | C        | T        | G        | T        | C        | C        | C        | A        | C        | C        | C        | T        | G        | T        | 0.64% (399 reads)    |                      |                   |
| A         | T | G        | G | T        | A | A | T | G | T | C | C | C        | T | C | C | - | G | G | G | G        | A        | A        | G        | T        | T        | C        | T        | G        | T        | C        | C        | C        | A        | C        | C        | C        | T        | G        | T        | 0.60% (376 reads)    |                      |                   |
| A         | T | G        | G | T        | A | A | T | G | T | C | C | C        | T | - | - | - | - | - | - | -        | A        | A        | G        | T        | T        | C        | T        | G        | T        | C        | C        | C        | A        | C        | C        | C        | T        | G        | T        | 0.47% (294 reads)    |                      |                   |
| A         | T | G        | G | T        | A | A | T | G | T | C | C | C        | T | C | C | T | - | G | G | G        | <b>T</b> | A        | A        | G        | T        | T        | C        | T        | G        | T        | C        | C        | C        | A        | C        | C        | C        | T        | G        | T                    | 0.45% (283 reads)    |                   |
| A         | T | G        | G | T        | A | A | T | G | T | C | C | <b>A</b> | T | C | C | - | G | G | G | G        | A        | A        | G        | T        | T        | C        | T        | G        | T        | C        | C        | C        | A        | C        | C        | C        | T        | G        | T        | 0.44% (274 reads)    |                      |                   |
| A         | T | G        | G | T        | A | A | T | G | T | C | C | C        | T | C | C | T | G | G | G | <b>A</b> | <b>A</b> | G        | A        | A        | G        | T        | T        | C        | T        | G        | T        | C        | C        | C        | A        | C        | C        | C        | T        | G                    | T                    | 0.41% (253 reads) |
| A         | T | G        | G | T        | A | A | T | G | T | C | C | C        | T | C | C | T | G | G | G | <b>T</b> | A        | -        | G        | T        | T        | C        | T        | G        | T        | C        | C        | C        | A        | C        | C        | C        | T        | G        | T        | 0.39% (243 reads)    |                      |                   |
| A         | T | G        | G | T        | A | A | T | G | T | C | C | C        | T | C | C | T | G | - | - | -        | A        | A        | G        | T        | T        | C        | T        | G        | T        | C        | C        | C        | A        | C        | C        | C        | T        | G        | T        | 0.38% (235 reads)    |                      |                   |
| A         | T | G        | G | T        | A | A | T | G | T | C | C | C        | T | C | C | T | - | - | - | G        | A        | A        | G        | T        | T        | C        | T        | G        | T        | C        | C        | C        | A        | C        | C        | C        | T        | G        | T        | 0.36% (226 reads)    |                      |                   |
| A         | T | G        | G | T        | A | A | T | G | T | C | C | C        | T | C | C | T | G | G | G | <b>T</b> | <b>C</b> | <b>C</b> | <b>T</b> | <b>C</b> | <b>A</b> | <b>T</b> | <b>G</b> | <b>G</b> | <b>G</b> | <b>C</b> | <b>A</b> | <b>C</b> | <b>T</b> | <b>A</b> | <b>T</b> | <b>G</b> | <b>A</b> | <b>A</b> | <b>T</b> | 0.36% (222 reads)    |                      |                   |
| A         | T | G        | G | T        | A | A | T | G | T | C | C | -        | - | - | - | - | - | - | - | G        | A        | A        | G        | T        | T        | C        | T        | G        | T        | C        | C        | C        | A        | C        | C        | C        | T        | G        | T        | 0.35% (216 reads)    |                      |                   |
| A         | T | G        | G | <b>C</b> | A | A | T | G | T | C | C | C        | T | C | C | T | G | G | G | G        | A        | A        | G        | T        | T        | C        | T        | G        | T        | C        | C        | C        | A        | C        | C        | C        | T        | G        | T        | 0.32% (200 reads)    |                      |                   |
| A         | T | G        | G | T        | A | A | T | G | T | C | C | C        | T | C | C | - | - | - | - | -        | A        | A        | G        | T        | T        | C        | T        | G        | T        | C        | C        | C        | A        | C        | C        | C        | T        | G        | T        | 0.27% (169 reads)    |                      |                   |
| A         | - | -        | - | -        | - | - | - | - | - | - | - | -        | - | - | - | - | - | - | - | -        | G        | A        | A        | G        | T        | T        | C        | T        | G        | T        | C        | C        | C        | A        | C        | C        | C        | T        | G        | T                    | 0.27% (167 reads)    |                   |
| A         | T | <b>A</b> | G | T        | A | A | T | G | T | C | C | C        | T | C | C | T | G | G | G | G        | A        | A        | G        | T        | T        | C        | T        | G        | T        | C        | C        | C        | A        | C        | C        | C        | T        | G        | T        | 0.21% (132 reads)    |                      |                   |

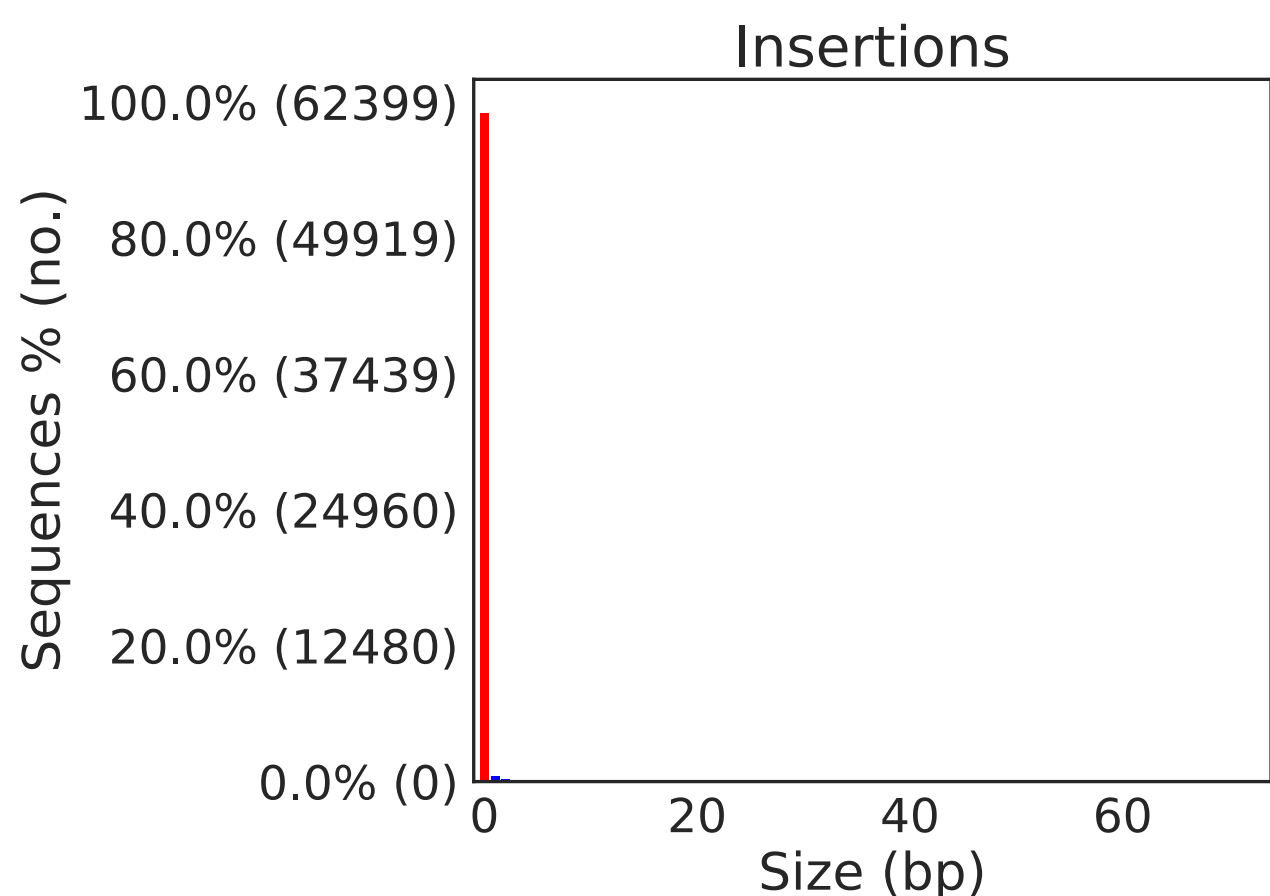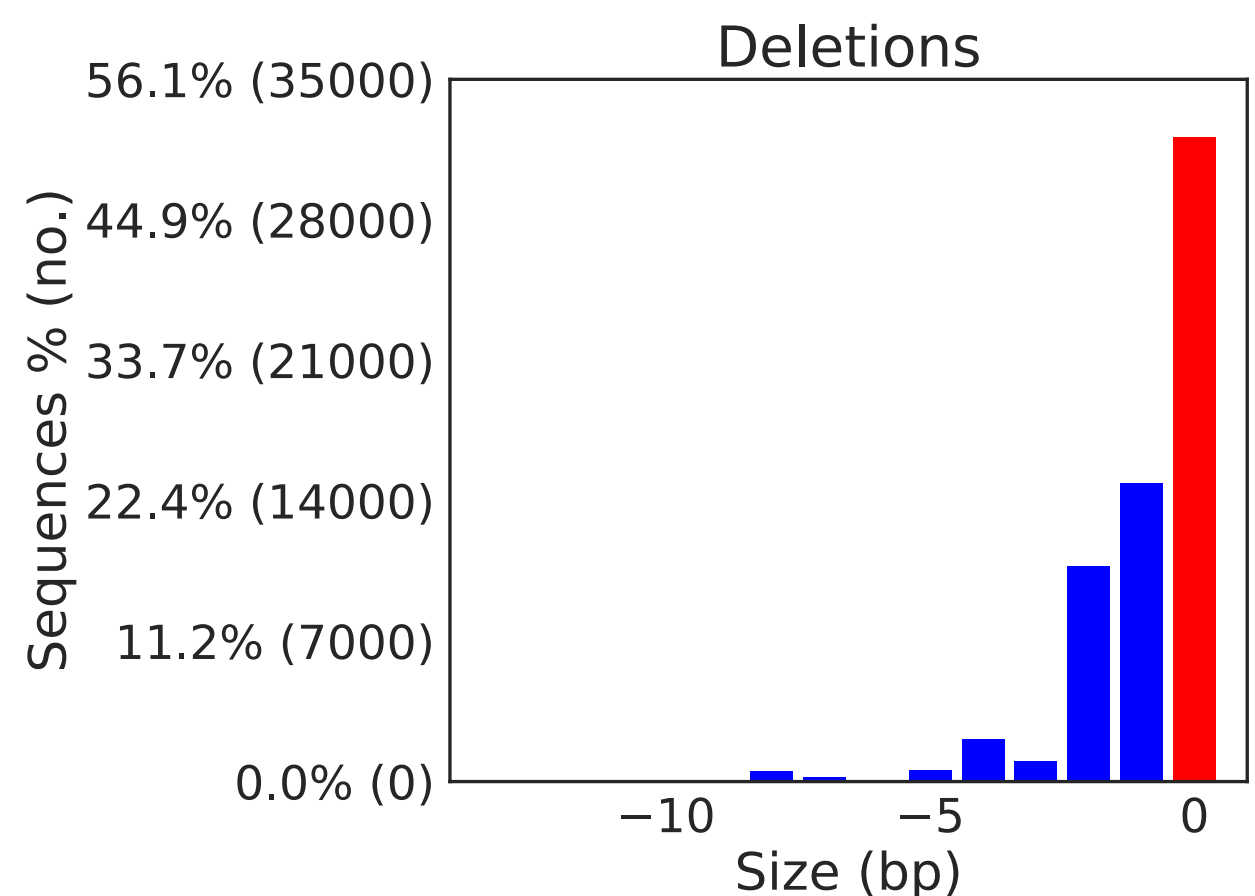

— Insertion  
 — Non-insertion

— Deletion  
 — Non-deletion



# *Tmc1*<sup>Bth/WT</sup>, SpCas9 + gRNA 1.1, WT allele only

**bold** Substitutions  
  Insertions  
 - Deletions  
 - - - Predicted cleavage position

| Reference |   |   |          |   |   |   |   |   |   |   |   |   |   |   |   |          |          |          |          |          |   |          |   |   |   |   |   |   |   |   |   |   |   |   |   |   |   |   |   |                      |
|-----------|---|---|----------|---|---|---|---|---|---|---|---|---|---|---|---|----------|----------|----------|----------|----------|---|----------|---|---|---|---|---|---|---|---|---|---|---|---|---|---|---|---|---|----------------------|
| A         | T | G | G        | T | A | A | T | G | T | C | C | C | T | C | C | T        | G        | G        | G        | G        | A | A        | G | T | T | C | T | G | T | C | C | C | A | C | C | C | T | G | T | 65.46% (51747 reads) |
| A         | T | G | G        | T | A | A | T | G | T | C | C | C | T | C | C | T        | -        | G        | G        | G        | A | <b>T</b> | G | T | T | C | T | G | T | C | C | C | A | C | C | C | T | G | T | 9.71% (7675 reads)   |
| A         | T | G | G        | T | A | A | T | G | T | C | C | C | T | C | C | T        | G        | G        | G        | -        | A | <b>T</b> | G | T | T | C | T | G | T | C | C | C | A | C | C | C | T | G | T | 9.33% (7374 reads)   |
| A         | T | G | G        | T | A | A | T | G | T | C | C | C | T | C | C | T        | G        | G        | G        | -        | - | <b>T</b> | G | T | T | C | T | G | T | C | C | C | A | C | C | C | T | G | T | 2.39% (1887 reads)   |
| A         | T | G | G        | T | A | A | T | G | T | C | C | C | T | C | C | T        | G        | G        | G        | <b>T</b> | - | -        | G | T | T | C | T | G | T | C | C | C | A | C | C | C | T | G | T | 2.24% (1772 reads)   |
| A         | T | G | G        | T | A | A | T | G | T | C | C | C | T | C | C | T        | -        | -        | -        | -        | - | -        | G | T | T | C | T | G | T | C | C | C | A | C | C | C | T | G | T | 1.08% (857 reads)    |
| A         | T | G | G        | T | A | A | T | G | T | C | C | C | T | C | C | T        | G        | -        | -        | -        | - | -        | - | T | T | C | T | G | T | C | C | C | A | C | C | C | T | G | T | 0.99% (781 reads)    |
| A         | T | G | G        | T | A | A | T | G | T | C | C | C | T | C | C | -        | -        | -        | -        | G        | A | <b>T</b> | G | T | T | C | T | G | T | C | C | C | A | C | C | C | T | G | T | 0.84% (666 reads)    |
| A         | T | G | G        | T | A | A | T | G | T | C | C | C | T | C | C | T        | G        | G        | -        | -        | A | <b>T</b> | G | T | T | C | T | G | T | C | C | C | A | C | C | C | T | G | T | 0.68% (541 reads)    |
| A         | T | G | G        | T | A | A | T | G | T | C | C | C | T | C | C | T        | -        | -        | G        | G        | A | <b>T</b> | G | T | T | C | T | G | T | C | C | C | A | C | C | C | T | G | T | 0.67% (532 reads)    |
| A         | T | G | G        | T | A | A | T | G | T | C | C | C | T | C | C | -        | G        | G        | G        | G        | A | <b>T</b> | G | T | T | C | T | G | T | C | C | C | A | C | C | C | T | G | T | 0.55% (433 reads)    |
| A         | T | G | G        | T | A | A | T | G | T | C | C | C | T | C | C | T        | G        | G        | G        | <b>T</b> | G | G        | T | G | G | T | A | G | T | T | G | T | T | G | A | T | C | T | C | 0.48% (378 reads)    |
| A         | T | G | G        | T | A | A | T | G | T | C | C | C | T | C | C | T        | G        | -        | -        | -        | A | <b>T</b> | G | T | T | C | T | G | T | C | C | C | A | C | C | C | T | G | T | 0.38% (300 reads)    |
| A         | T | G | G        | T | A | A | T | G | T | C | C | C | T | C | C | T        | -        | -        | -        | G        | A | <b>T</b> | G | T | T | C | T | G | T | C | C | C | A | C | C | C | T | G | T | 0.34% (269 reads)    |
| A         | T | G | G        | T | A | - | - | - | - | - | - | - | - | - | C | <b>A</b> | <b>G</b> | <b>A</b> | <b>G</b> | <b>C</b> | A | A        | - | - | - | - | - | - | - | - | - | - | - | - | - | - | - | - | - | 0.30% (234 reads)    |
| A         | T | G | G        | T | A | A | T | G | T | C | C | - | - | - | - | -        | -        | -        | -        | G        | A | <b>T</b> | G | T | T | C | T | G | T | C | C | C | A | C | C | C | T | G | T | 0.27% (211 reads)    |
| A         | T | G | G        | T | A | A | T | G | T | C | C | C | T | C | C | T        | -        | -        | -        | -        | - | <b>T</b> | G | T | T | C | T | G | T | C | C | C | A | C | C | C | T | G | T | 0.26% (202 reads)    |
| A         | T | G | G        | T | A | A | T | G | T | C | C | C | T | C | C | T        | <b>T</b> | G        | -        | -        | - | -        | - | T | T | C | T | G | T | C | C | C | A | C | C | C | T | G | T | 0.25% (201 reads)    |
| A         | T | G | G        | T | A | A | T | G | T | C | C | C | - | - | - | -        | -        | -        | -        | G        | A | <b>T</b> | G | T | T | C | T | G | T | C | C | C | A | C | C | C | T | G | T | 0.24% (189 reads)    |
| A         | T | G | G        | T | A | A | T | G | T | C | C | C | T | C | - | -        | -        | -        | -        | G        | A | <b>T</b> | G | T | T | C | T | G | T | C | C | C | A | C | C | C | T | G | T | 0.22% (174 reads)    |
| A         | T | G | <b>A</b> | T | A | A | T | G | T | C | C | C | T | C | C | T        | G        | G        | G        | G        | A | <b>T</b> | G | T | T | C | T | G | T | C | C | C | A | C | C | C | T | G | T | 0.22% (171 reads)    |

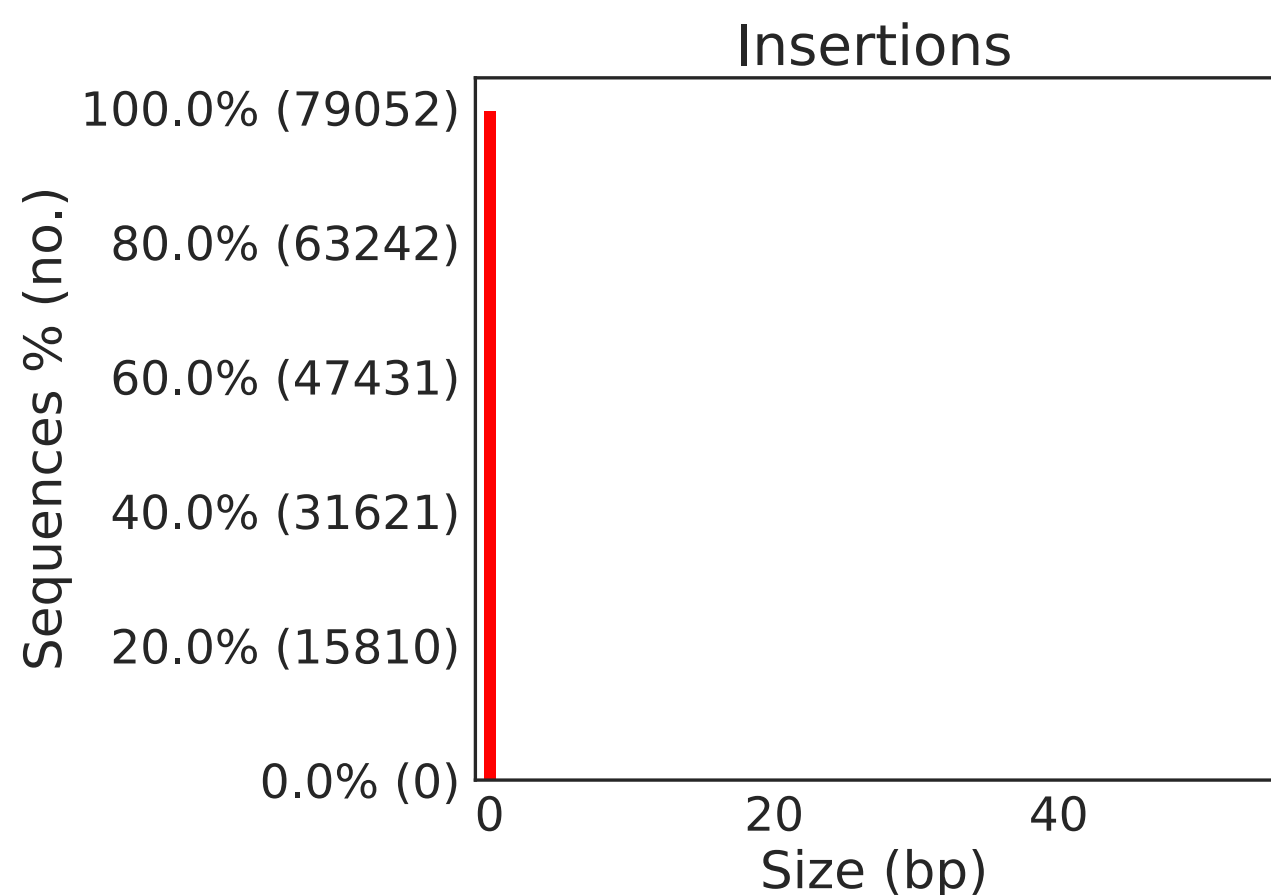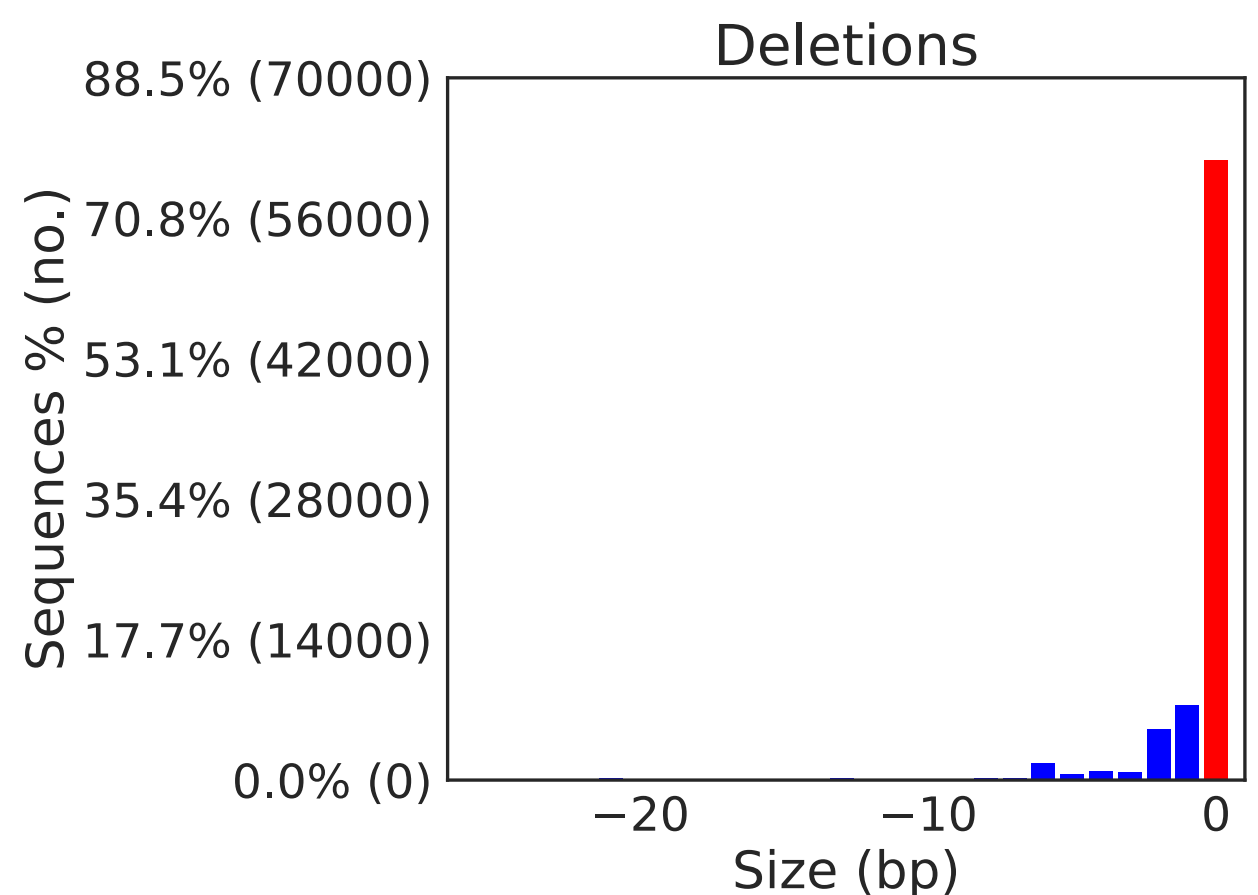

Insertion  
 Non-insertion

Deletion  
 Non-deletion

# *Tmc1*<sup>Bth/WT</sup>, SpCas9 + gRNA 2.1, Bth allele only

**bold** Substitutions  
  Insertions  
 - Deletions  
 - - - Predicted cleavage position

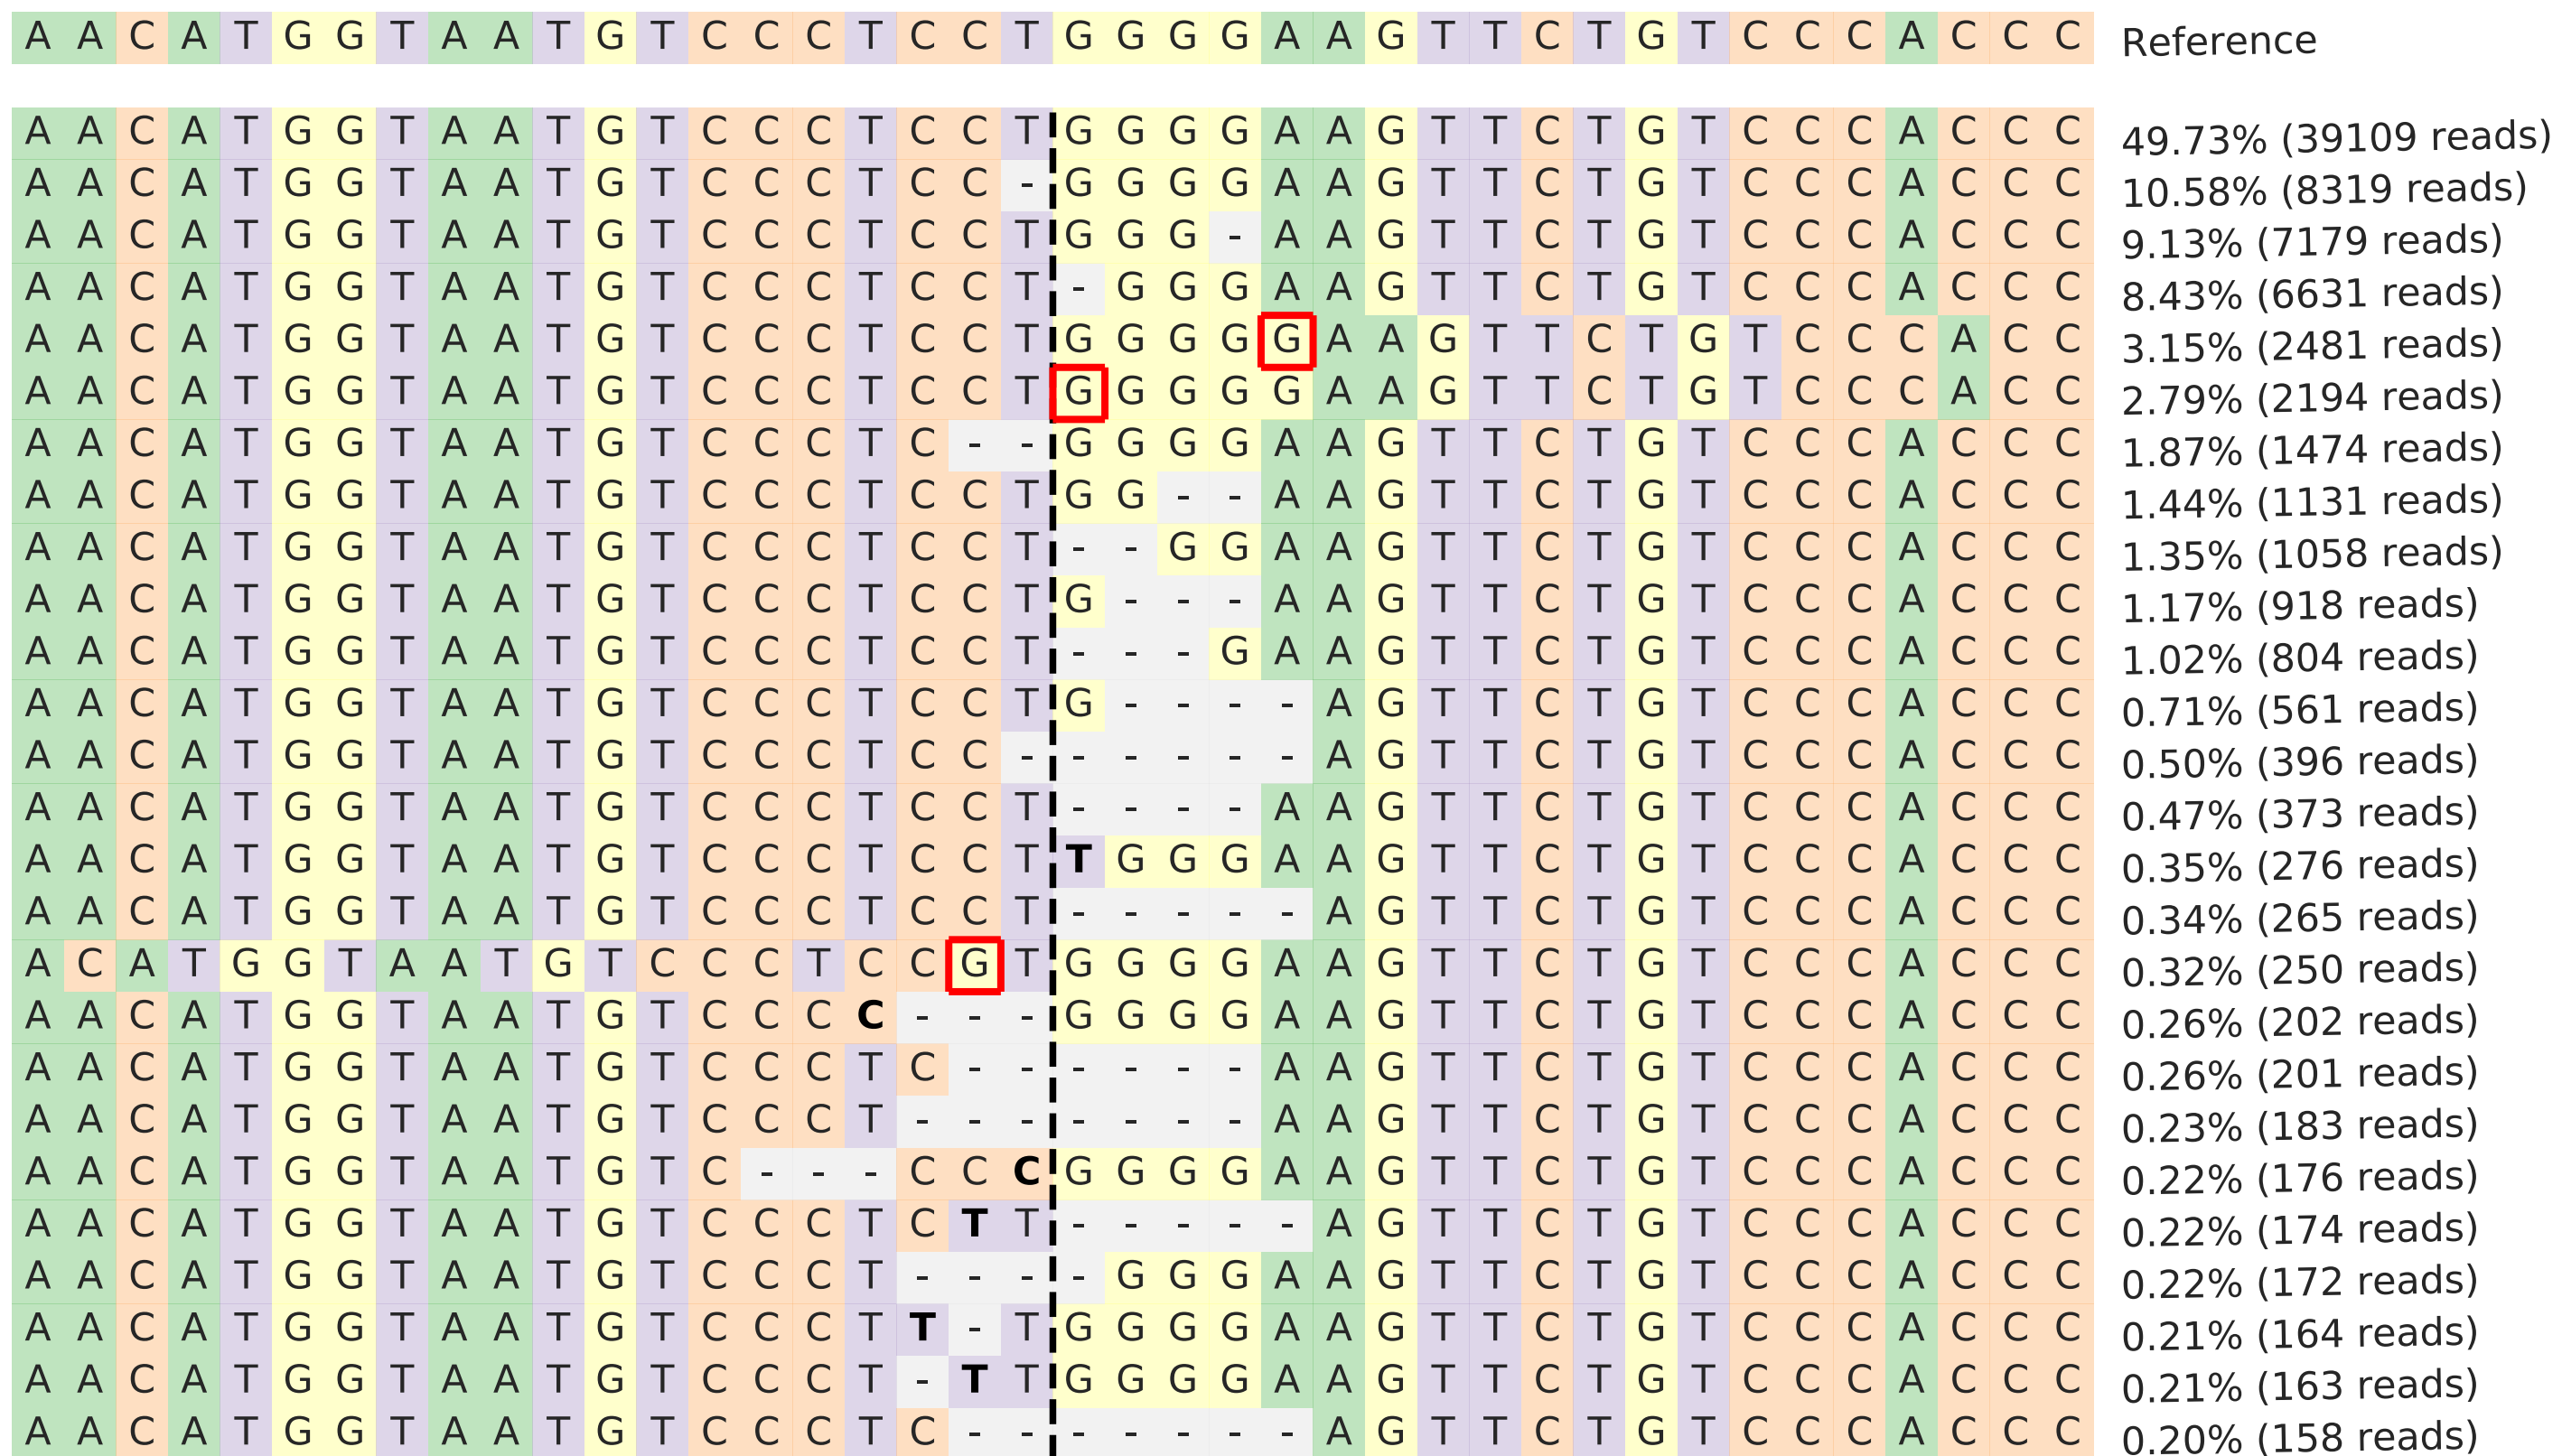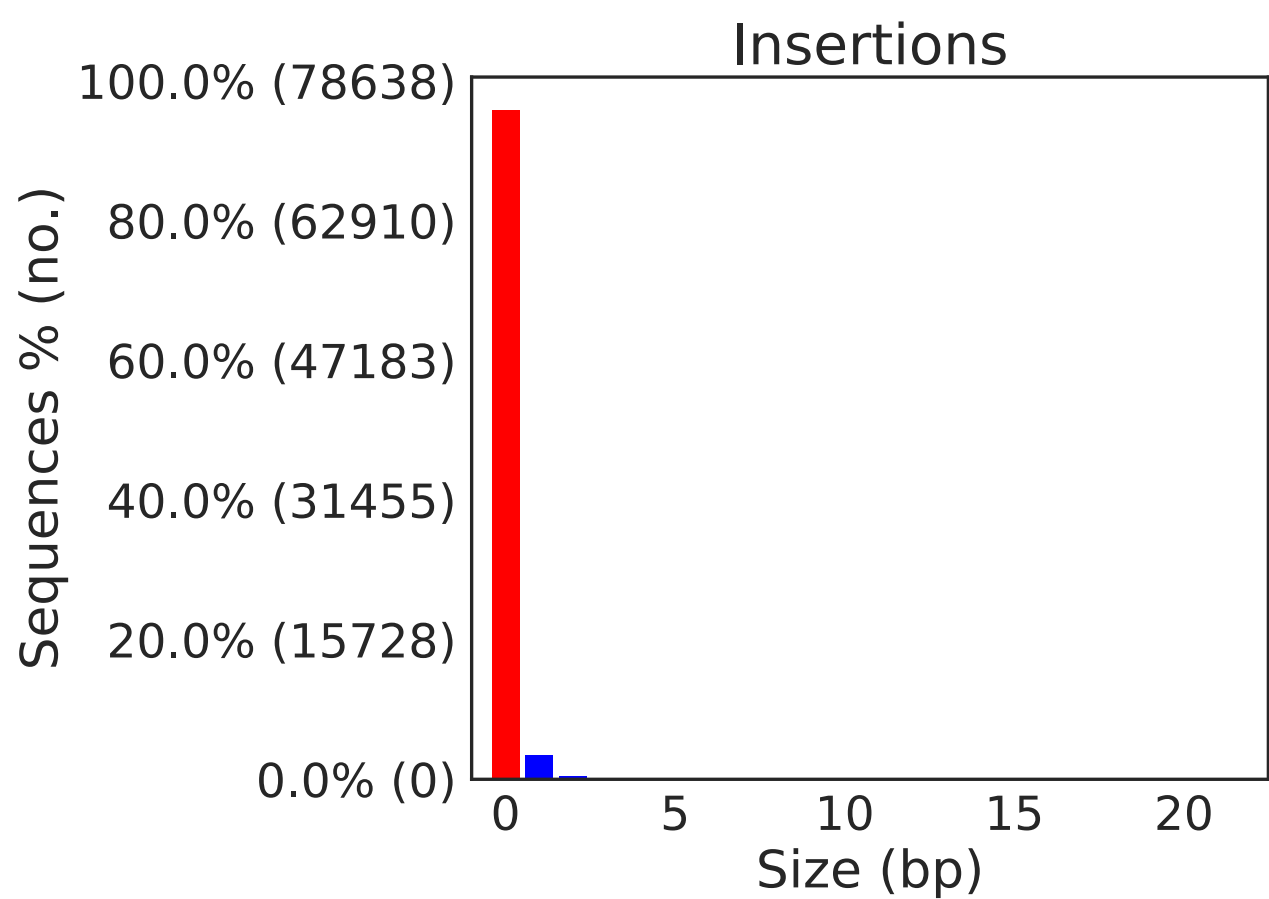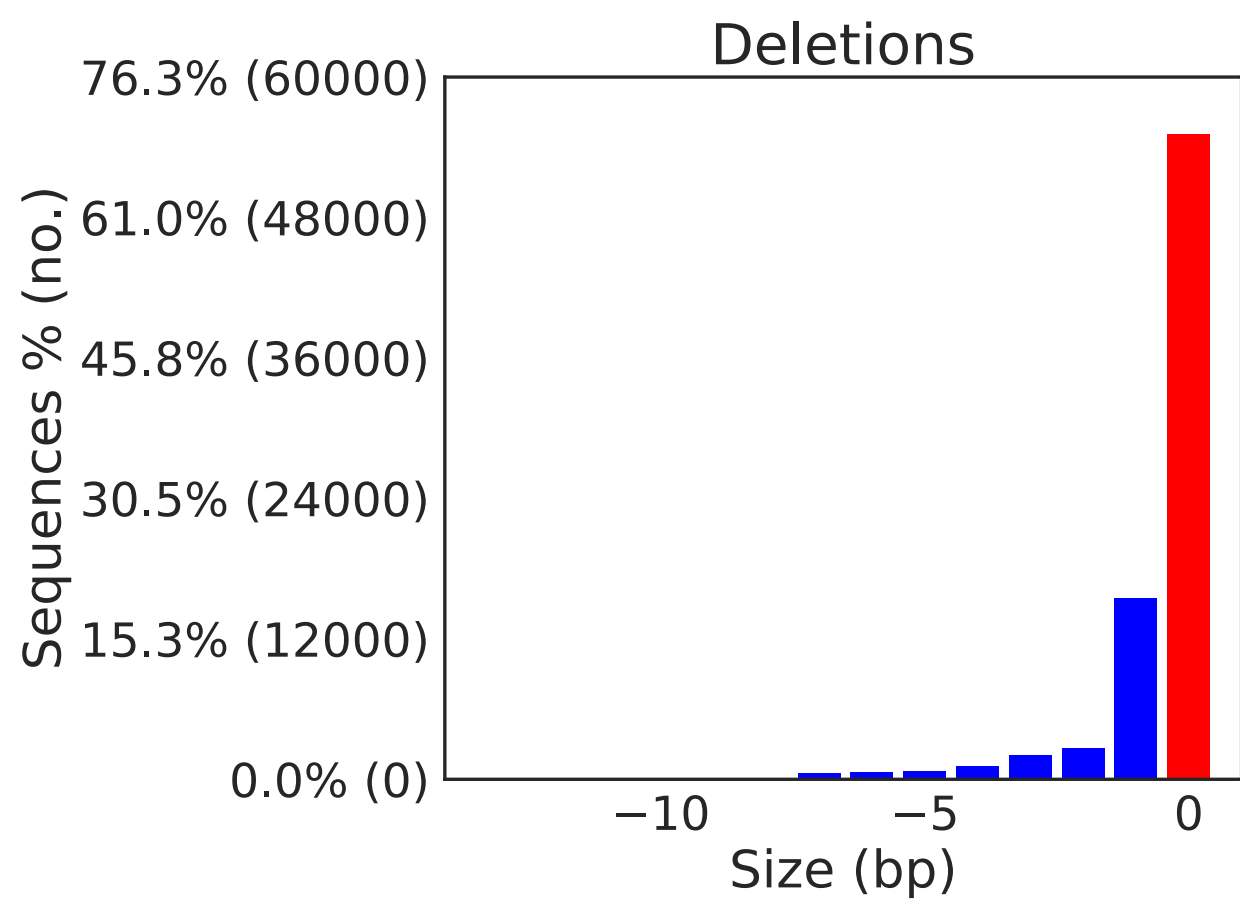

■ Insertion  
 ■ Non-insertion

■ Deletion  
 ■ Non-deletion

# *Tmc1*<sup>Bth/WT</sup>, SpCas9 + gRNA 2.1, WT allele only

**bold** Substitutions  
  Insertions  
 - Deletions  
 - - - Predicted cleavage position

| Reference |   |   |   |   |   |   |   |   |   |   |   |   |   |   |   |   |   |   |   |                                                               |          |   |   |          |          |                                                               |   |   |   |   |   |   |   |   |   |   |   |   |                    |                      |                    |
|-----------|---|---|---|---|---|---|---|---|---|---|---|---|---|---|---|---|---|---|---|---------------------------------------------------------------|----------|---|---|----------|----------|---------------------------------------------------------------|---|---|---|---|---|---|---|---|---|---|---|---|--------------------|----------------------|--------------------|
| A         | A | C | A | T | G | G | T | A | A | T | G | T | C | C | C | T | C | C | T | G                                                             | G        | G | G | A        | A        | G                                                             | T | T | C | T | G | T | C | C | C | A | C | C | C                  | 72.42% (69583 reads) |                    |
| A         | A | C | A | T | G | G | T | A | A | T | G | T | C | C | C | T | C | C | T | G                                                             | G        | G | - | A        | <b>T</b> | G                                                             | T | T | C | T | G | T | C | C | C | A | C | C | C                  | 5.86% (5630 reads)   |                    |
| A         | A | C | A | T | G | G | T | A | A | T | G | T | C | C | C | T | C | C | T | -                                                             | G        | G | G | A        | <b>T</b> | G                                                             | T | T | C | T | G | T | C | C | C | A | C | C | C                  | 5.33% (5117 reads)   |                    |
| A         | A | C | A | T | G | G | T | A | A | T | G | T | C | C | C | T | C | C | - | G                                                             | G        | G | A | <b>T</b> | G        | T                                                             | T | C | T | G | T | C | C | C | A | C | C | C | 4.36% (4188 reads) |                      |                    |
| A         | A | C | A | T | G | G | T | A | A | T | G | T | C | C | C | T | C | C | T | G                                                             | G        | G | G | <b>G</b> | <b>A</b> | <span style="border: 1px solid red; padding: 0 2px;">T</span> | G | T | T | C | T | G | T | C | C | C | A | C | C                  | C                    | 1.65% (1581 reads) |
| A         | A | C | A | T | G | G | T | A | A | T | G | T | C | C | C | T | C | C | T | <span style="border: 1px solid red; padding: 0 2px;">G</span> | G        | G | G | A        | <b>T</b> | G                                                             | T | T | C | T | G | T | C | C | C | A | C | C | C                  | 1.42% (1365 reads)   |                    |
| A         | A | C | A | T | G | G | T | A | A | T | G | T | C | C | C | T | C | C | T | G                                                             | -        | - | - | -        | -        | -                                                             | T | T | C | T | G | T | C | C | C | A | C | C | C                  | 0.99% (948 reads)    |                    |
| A         | A | C | A | T | G | G | T | A | A | T | G | T | C | C | C | T | C | C | T | -                                                             | -        | - | - | -        | G        | T                                                             | T | C | T | G | T | C | C | C | A | C | C | C | 0.94% (905 reads)  |                      |                    |
| A         | A | C | A | T | G | G | T | A | A | T | G | T | C | C | C | T | C | C | T | G                                                             | G        | - | - | A        | <b>T</b> | G                                                             | T | T | C | T | G | T | C | C | C | A | C | C | C                  | 0.90% (868 reads)    |                    |
| A         | A | C | A | T | G | G | T | A | A | T | G | T | C | C | C | T | C | C | T | -                                                             | -        | G | G | A        | <b>T</b> | G                                                             | T | T | C | T | G | T | C | C | C | A | C | C | C                  | 0.78% (752 reads)    |                    |
| A         | A | C | A | T | G | G | T | A | A | T | G | T | C | C | C | T | C | C | - | -                                                             | G        | G | G | A        | <b>T</b> | G                                                             | T | T | C | T | G | T | C | C | C | A | C | C | C                  | 0.31% (301 reads)    |                    |
| A         | A | C | A | T | G | G | T | A | A | T | - | - | - | - | - | - | - | - | - | -                                                             | -        | - | - | -        | G        | T                                                             | T | C | T | G | T | C | C | C | A | C | C | C | 0.28% (270 reads)  |                      |                    |
| A         | A | C | A | T | G | G | T | A | A | T | G | T | - | - | - | - | - | - | - | -                                                             | -        | - | - | -        | -        | -                                                             | - | T | C | T | G | T | C | C | C | A | C | C | C                  | 0.25% (245 reads)    |                    |
| A         | A | C | A | T | G | - | - | - | - | - | - | - | - | - | - | - | - | - | - | -                                                             | -        | - | - | -        | -        | -                                                             | T | T | C | T | G | T | C | C | C | A | C | C | C                  | 0.23% (220 reads)    |                    |
| A         | A | C | A | T | G | G | T | A | A | T | G | T | C | C | C | T | C | C | T | <span style="border: 1px solid red; padding: 0 2px;">C</span> | G        | G | G | G        | A        | <b>T</b>                                                      | G | T | T | C | T | G | T | C | C | C | A | C | C                  | C                    | 0.22% (211 reads)  |
| A         | A | C | A | T | - | - | - | - | - | - | - | - | - | - | - | - | - | - | - | -                                                             | -        | - | - | -        | G        | T                                                             | T | C | T | G | T | C | C | C | A | C | C | C | 0.22% (210 reads)  |                      |                    |
| A         | A | C | A | T | G | G | T | A | A | T | G | T | C | C | C | T | C | C | - | -                                                             | -        | G | G | A        | <b>T</b> | G                                                             | T | T | C | T | G | T | C | C | C | A | C | C | C                  | 0.22% (208 reads)    |                    |
| A         | A | C | A | T | G | G | T | A | A | T | G | T | C | C | C | T | C | C | T | G                                                             | <b>T</b> | G | - | -        | -        | -                                                             | T | T | C | T | G | T | C | C | C | A | C | C | C                  | 0.21% (204 reads)    |                    |

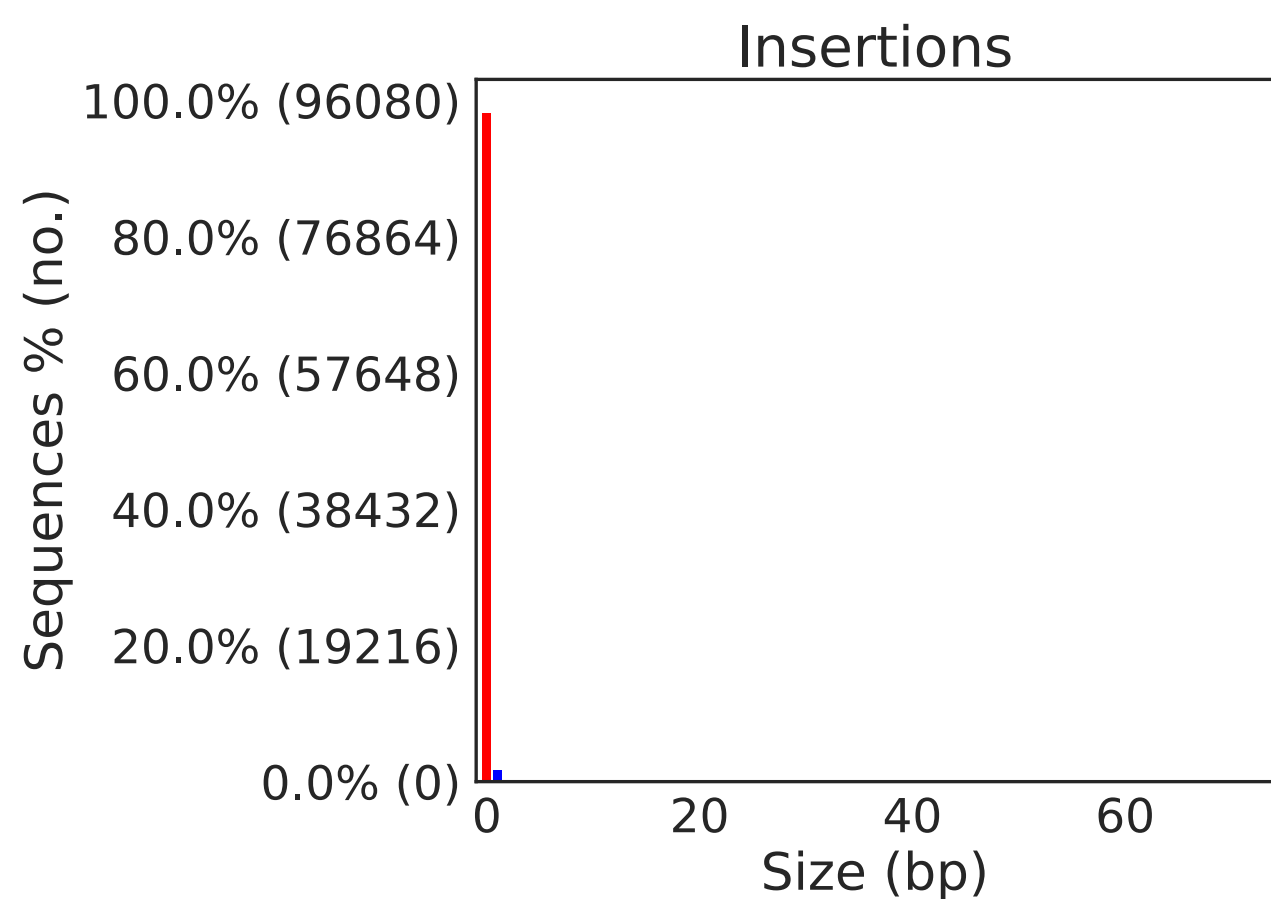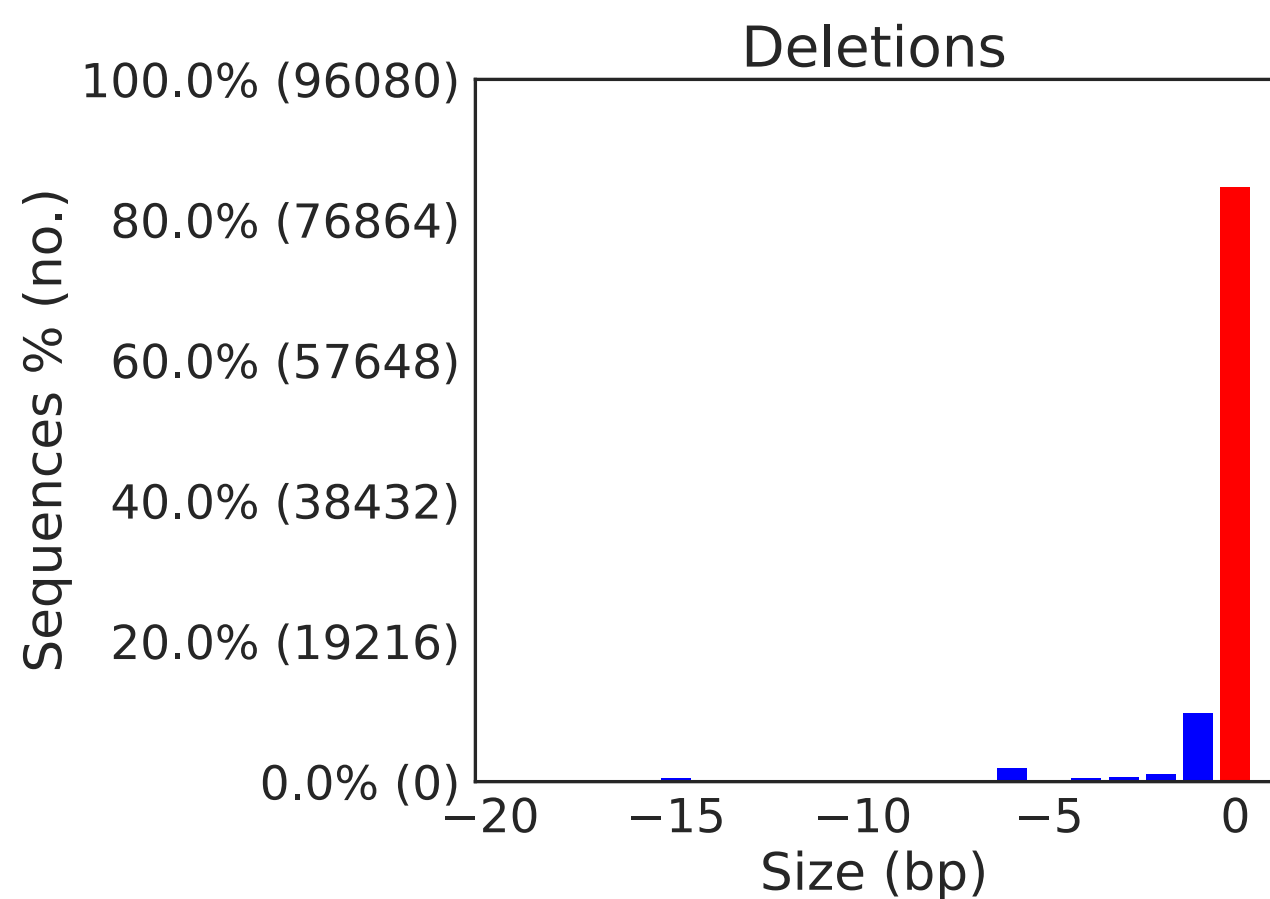

Insertion  
 Non-insertion

Deletion  
 Non-deletion



# *Tmc1*<sup>Bth/WT</sup>, SpCas9 + gRNA 2.4, Bth allele only

**bold** Substitutions  
  Insertions  
 - Deletions  
 - - - Predicted cleavage position

| Reference |   |   |   |   |   |   |   |   |   |   |   |   |   |   |   |   |          |                                                               |   |                                                               |   |   |   |                                                               |   |   |   |   |   |   |   |   |   |   |   |   |   |   |   |                      |                    |                      |
|-----------|---|---|---|---|---|---|---|---|---|---|---|---|---|---|---|---|----------|---------------------------------------------------------------|---|---------------------------------------------------------------|---|---|---|---------------------------------------------------------------|---|---|---|---|---|---|---|---|---|---|---|---|---|---|---|----------------------|--------------------|----------------------|
| A         | A | C | A | T | G | G | T | A | A | T | G | T | C | C | C | T | C        | C                                                             | T | G                                                             | G | G | G | A                                                             | A | G | T | T | C | T | G | T | C | C | C | A | C | C | C | 18.73% (16088 reads) |                    |                      |
| A         | A | C | A | T | G | G | T | A | A | T | G | T | C | C | C | T | C        | C                                                             | T | C                                                             | C | T | G | G                                                             | G | A | A | G | T | T | C | T | G | T | C | C | C | A | C | C                    | C                  | 15.01% (12896 reads) |
| A         | A | C | A | T | G | G | T | A | A | T | G | T | C | C | C | T | C        | C                                                             | T | -                                                             | G | G | G | A                                                             | A | G | T | T | C | T | G | T | C | C | C | A | C | C | C | 13.82% (11873 reads) |                    |                      |
| A         | A | C | A | T | G | G | T | A | A | T | G | T | C | C | C | T | C        | C                                                             | T | G                                                             | G | G | - | A                                                             | A | G | T | T | C | T | G | T | C | C | C | A | C | C | C | 11.65% (10008 reads) |                    |                      |
| A         | A | C | A | T | G | G | T | A | A | T | G | T | C | C | C | T | C        | C                                                             | T | -                                                             | - | G | G | A                                                             | A | G | T | T | C | T | G | T | C | C | C | A | C | C | C | 6.42% (5512 reads)   |                    |                      |
| A         | A | C | A | T | G | G | T | A | A | T | G | T | C | C | C | T | C        | C                                                             | T | <span style="border: 1px solid red; padding: 0 2px;">G</span> | G | G | G | G                                                             | A | A | G | T | T | C | T | G | T | C | C | C | A | C | C | C                    | 6.38% (5476 reads) |                      |
| A         | A | C | A | T | G | G | T | A | A | T | G | T | C | C | C | T | C        | C                                                             | T | G                                                             | G | G | G | <span style="border: 1px solid red; padding: 0 2px;">G</span> | A | A | G | T | T | C | T | G | T | C | C | C | A | C | C | C                    | 5.24% (4503 reads) |                      |
| A         | A | C | A | T | G | G | T | A | A | T | G | T | C | C | C | T | C        | C                                                             | T | G                                                             | G | - | - | A                                                             | A | G | T | T | C | T | G | T | C | C | C | A | C | C | C | 5.23% (4496 reads)   |                    |                      |
| A         | A | C | A | T | G | G | T | A | A | T | G | T | C | C | C | T | C        | -                                                             | - | G                                                             | G | G | G | A                                                             | A | G | T | T | C | T | G | T | C | C | C | A | C | C | C | 3.58% (3075 reads)   |                    |                      |
| A         | A | C | A | T | G | G | T | A | A | T | G | T | C | C | C | T | C        | C                                                             | T | -                                                             | - | - | - | -                                                             | A | A | G | T | T | C | T | G | T | C | C | C | A | C | C | C                    | 2.36% (2031 reads) |                      |
| A         | A | C | A | T | G | G | T | A | A | T | G | T | C | C | C | T | C        | C                                                             | T | G                                                             | - | - | - | -                                                             | A | A | G | T | T | C | T | G | T | C | C | C | A | C | C | C                    | 1.46% (1257 reads) |                      |
| A         | C | A | T | G | G | T | A | A | T | G | T | C | C | C | T | C | C        | <span style="border: 1px solid red; padding: 0 2px;">T</span> | T | G                                                             | G | G | G | A                                                             | A | G | T | T | C | T | G | T | C | C | C | A | C | C | C | 1.13% (969 reads)    |                    |                      |
| A         | A | C | A | T | G | G | T | A | A | T | G | T | C | C | C | T | C        | C                                                             | T | -                                                             | - | - | - | A                                                             | A | G | T | T | C | T | G | T | C | C | C | A | C | C | C | 1.07% (922 reads)    |                    |                      |
| A         | A | C | A | T | G | G | T | A | A | T | G | T | C | C | C | T | C        | C                                                             | T | <span style="border: 1px solid red; padding: 0 2px;">T</span> | G | G | G | G                                                             | A | A | G | T | T | C | T | G | T | C | C | C | A | C | C | C                    | 1.03% (883 reads)  |                      |
| A         | A | C | A | T | G | G | T | A | A | T | G | T | C | C | C | - | -        | -                                                             | - | G                                                             | G | G | G | A                                                             | A | G | T | T | C | T | G | T | C | C | C | A | C | C | C | 0.88% (752 reads)    |                    |                      |
| A         | A | C | A | T | G | G | T | A | A | T | G | T | C | C | C | T | C        | C                                                             | T | -                                                             | - | - | G | A                                                             | A | G | T | T | C | T | G | T | C | C | C | A | C | C | C | 0.76% (654 reads)    |                    |                      |
| A         | A | C | A | T | G | G | T | A | A | T | G | T | C | - | - | - | C        | C                                                             | T | G                                                             | G | G | G | A                                                             | A | G | T | T | C | T | G | T | C | C | C | A | C | C | C | 0.73% (625 reads)    |                    |                      |
| A         | A | C | A | T | G | G | T | A | A | T | G | T | C | C | C | T | C        | C                                                             | T | G                                                             | - | - | - | A                                                             | A | G | T | T | C | T | G | T | C | C | C | A | C | C | C | 0.64% (552 reads)    |                    |                      |
| A         | A | C | A | T | G | G | T | A | A | T | G | T | C | C | C | T | -        | -                                                             | - | G                                                             | G | G | G | A                                                             | A | G | T | T | C | T | G | T | C | C | C | A | C | C | C | 0.63% (540 reads)    |                    |                      |
| A         | A | C | A | T | G | G | T | A | A | T | G | T | C | C | C | T | -        | <b>T</b>                                                      | T | G                                                             | G | G | G | A                                                             | A | G | T | T | C | T | G | T | C | C | C | A | C | C | C | 0.55% (470 reads)    |                    |                      |
| A         | A | C | A | T | G | G | T | A | A | T | G | T | C | C | C | T | <b>T</b> | -                                                             | T | G                                                             | G | G | G | A                                                             | A | G | T | T | C | T | G | T | C | C | C | A | C | C | C | 0.44% (380 reads)    |                    |                      |

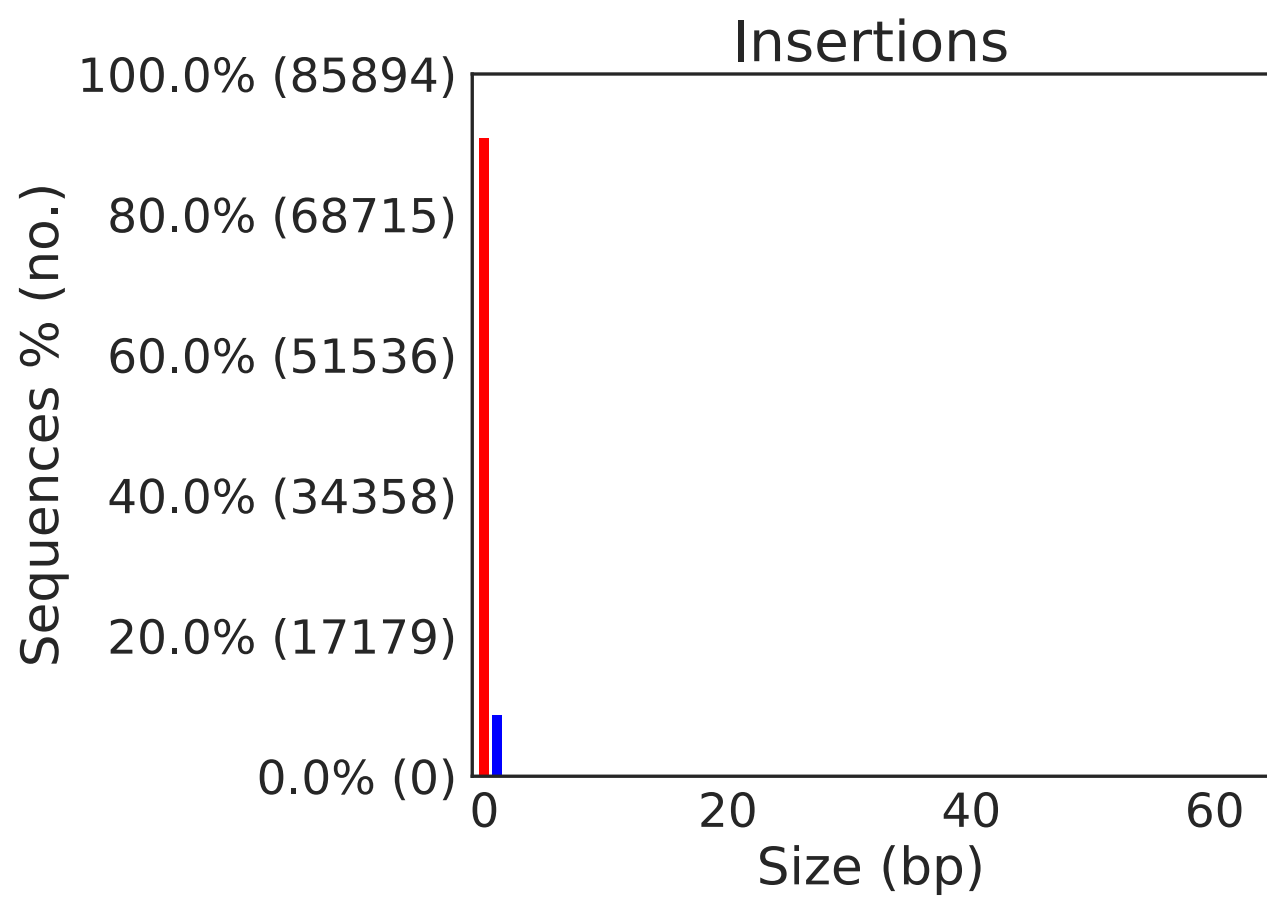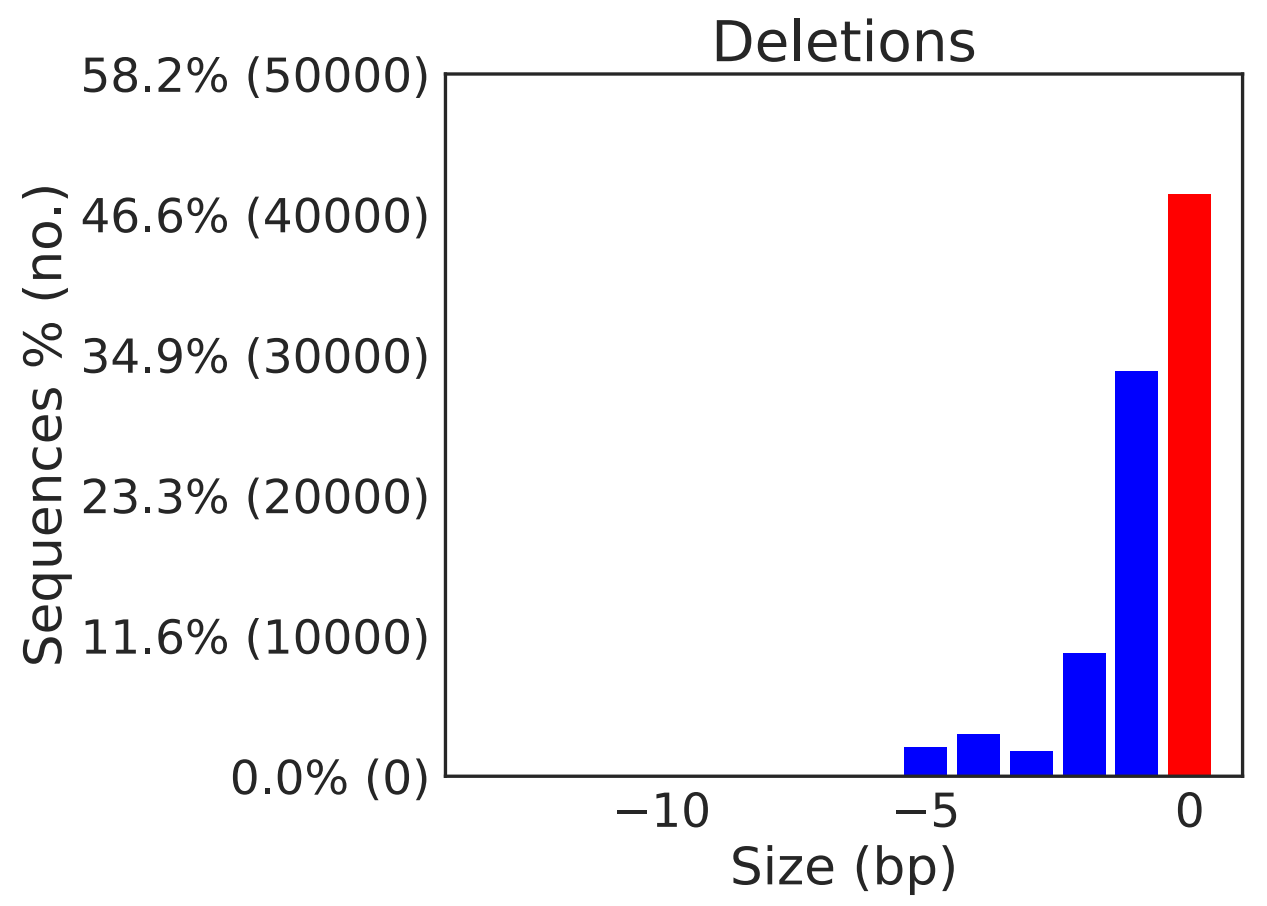

— Insertion  
 — Non-insertion

— Deletion  
 — Non-deletion

# *Tmc1*<sup>Bth/WT</sup>, SpCas9 + gRNA 2.4, WT allele only

**bold** Substitutions  
  Insertions  
 - Deletions  
 - - - Predicted cleavage position

| Reference |   |   |   |   |   |   |   |   |   |   |   |   |   |   |   |   |   |   |   |                                                               |          |   |   |          |          |                                                               |   |   |   |   |   |   |   |   |   |   |   |   |                   |                      |                    |
|-----------|---|---|---|---|---|---|---|---|---|---|---|---|---|---|---|---|---|---|---|---------------------------------------------------------------|----------|---|---|----------|----------|---------------------------------------------------------------|---|---|---|---|---|---|---|---|---|---|---|---|-------------------|----------------------|--------------------|
| A         | A | C | A | T | G | G | T | A | A | T | G | T | C | C | C | T | C | C | T | G                                                             | G        | G | G | A        | A        | G                                                             | T | T | C | T | G | T | C | C | C | A | C | C | C                 | 70.40% (91482 reads) |                    |
| A         | A | C | A | T | G | G | T | A | A | T | G | T | C | C | C | T | C | C | T | -                                                             | G        | G | G | A        | <b>T</b> | G                                                             | T | T | C | T | G | T | C | C | C | A | C | C | C                 | 7.03% (9141 reads)   |                    |
| A         | A | C | A | T | G | G | T | A | A | T | G | T | C | C | C | T | C | C | T | G                                                             | G        | G | - | A        | <b>T</b> | G                                                             | T | T | C | T | G | T | C | C | C | A | C | C | C                 | 5.97% (7754 reads)   |                    |
| A         | A | C | A | T | G | G | T | A | A | T | G | T | C | C | C | T | C | C | - | G                                                             | G        | G | G | A        | <b>T</b> | G                                                             | T | T | C | T | G | T | C | C | C | A | C | C | C                 | 5.00% (6503 reads)   |                    |
| A         | A | C | A | T | G | G | T | A | A | T | G | T | C | C | C | T | C | C | T | <span style="border: 1px solid red; padding: 0 2px;">G</span> | G        | G | G | G        | A        | <b>T</b>                                                      | G | T | T | C | T | G | T | C | C | C | A | C | C                 | C                    | 1.29% (1670 reads) |
| A         | A | C | A | T | G | G | T | A | A | T | G | T | C | C | C | T | C | C | T | G                                                             | G        | G | G | <b>G</b> | A        | <span style="border: 1px solid red; padding: 0 2px;">T</span> | G | T | T | C | T | G | T | C | C | C | A | C | C                 | C                    | 1.05% (1368 reads) |
| A         | A | C | A | T | G | G | T | A | A | T | G | T | C | C | C | T | C | C | T | -                                                             | -        | G | G | A        | <b>T</b> | G                                                             | T | T | C | T | G | T | C | C | C | A | C | C | C                 | 0.90% (1172 reads)   |                    |
| A         | A | C | A | T | G | G | T | A | A | T | G | T | C | C | C | T | C | C | T | -                                                             | -        | - | - | -        | -        | G                                                             | T | T | C | T | G | T | C | C | C | A | C | C | C                 | 0.81% (1052 reads)   |                    |
| A         | A | C | A | T | G | G | T | A | A | T | G | T | C | C | C | T | C | - | - | G                                                             | G        | G | G | A        | <b>T</b> | G                                                             | T | T | C | T | G | T | C | C | C | A | C | C | C                 | 0.78% (1017 reads)   |                    |
| A         | A | C | A | T | G | G | T | A | A | T | - | - | - | - | - | - | - | - | - | -                                                             | -        | - | - | -        | -        | G                                                             | T | T | C | T | G | T | C | C | C | A | C | C | C                 | 0.78% (1008 reads)   |                    |
| A         | A | C | A | T | G | G | T | A | A | T | G | T | C | C | C | T | C | C | T | G                                                             | G        | - | - | A        | <b>T</b> | G                                                             | T | T | C | T | G | T | C | C | C | A | C | C | C                 | 0.69% (895 reads)    |                    |
| A         | A | C | A | T | G | G | T | A | A | T | G | T | C | C | C | T | C | C | T | G                                                             | -        | - | - | -        | -        | -                                                             | - | T | T | C | T | G | T | C | C | C | A | C | C                 | C                    | 0.65% (846 reads)  |
| A         | A | C | A | T | G | G | T | A | A | T | G | T | - | - | - | - | - | - | - | -                                                             | -        | - | - | -        | -        | -                                                             | - | T | C | T | G | T | C | C | C | A | C | C | C                 | 0.60% (783 reads)    |                    |
| A         | A | C | A | T | G | G | T | A | A | T | G | T | C | C | C | T | C | C | T | -                                                             | -        | G | A | <b>T</b> | G        | T                                                             | T | C | T | G | T | C | C | C | A | C | C | C | 0.43% (564 reads) |                      |                    |
| A         | A | C | A | T | G | G | T | A | A | T | G | T | C | C | C | T | C | C | T | -                                                             | -        | - | - | <b>T</b> | <b>T</b> | G                                                             | T | T | C | T | G | T | C | C | C | A | C | C | C                 | 0.42% (546 reads)    |                    |
| A         | A | C | A | T | - | - | - | - | - | - | - | - | - | - | - | - | - | - | - | -                                                             | -        | - | - | -        | -        | G                                                             | T | T | C | T | G | T | C | C | C | A | C | C | C                 | 0.36% (468 reads)    |                    |
| A         | A | C | A | T | G | G | T | A | A | T | G | T | C | C | C | T | C | C | T | <b>T</b>                                                      | <b>T</b> | G | - | -        | -        | -                                                             | T | T | C | T | G | T | C | C | C | A | C | C | C                 | 0.34% (443 reads)    |                    |
| A         | A | C | A | T | G | G | T | A | A | T | G | T | C | C | C | T | C | C | T | G                                                             | -        | - | - | A        | <b>T</b> | G                                                             | T | T | C | T | G | T | C | C | C | A | C | C | C                 | 0.33% (430 reads)    |                    |
| A         | A | C | A | T | G | - | - | - | - | - | - | - | - | - | - | - | - | - | - | -                                                             | -        | - | - | -        | -        | -                                                             | T | T | C | T | G | T | C | C | C | A | C | C | C                 | 0.31% (409 reads)    |                    |

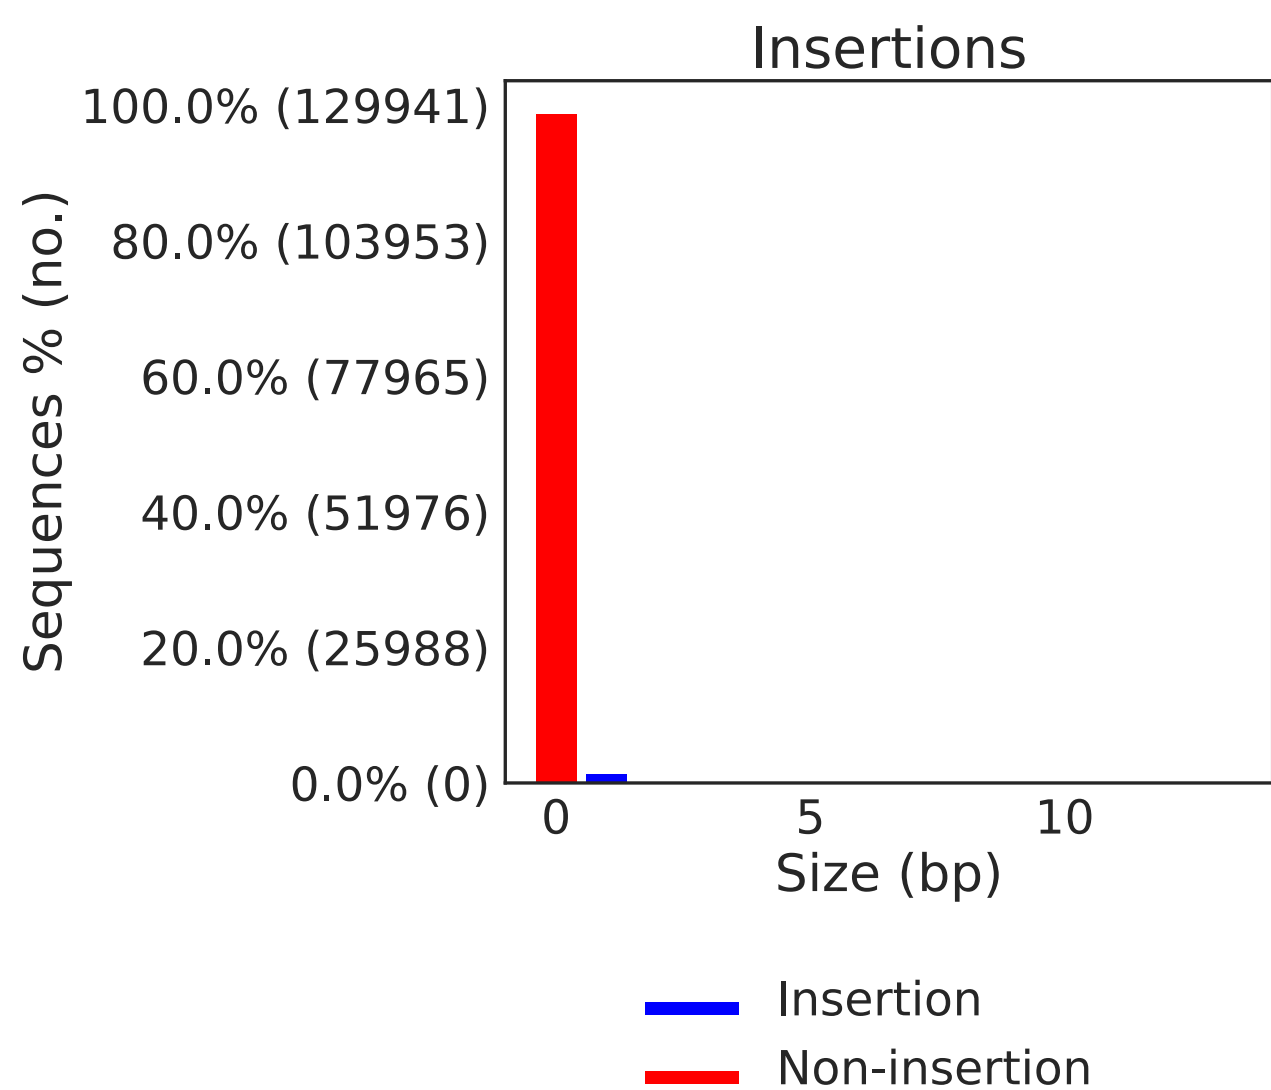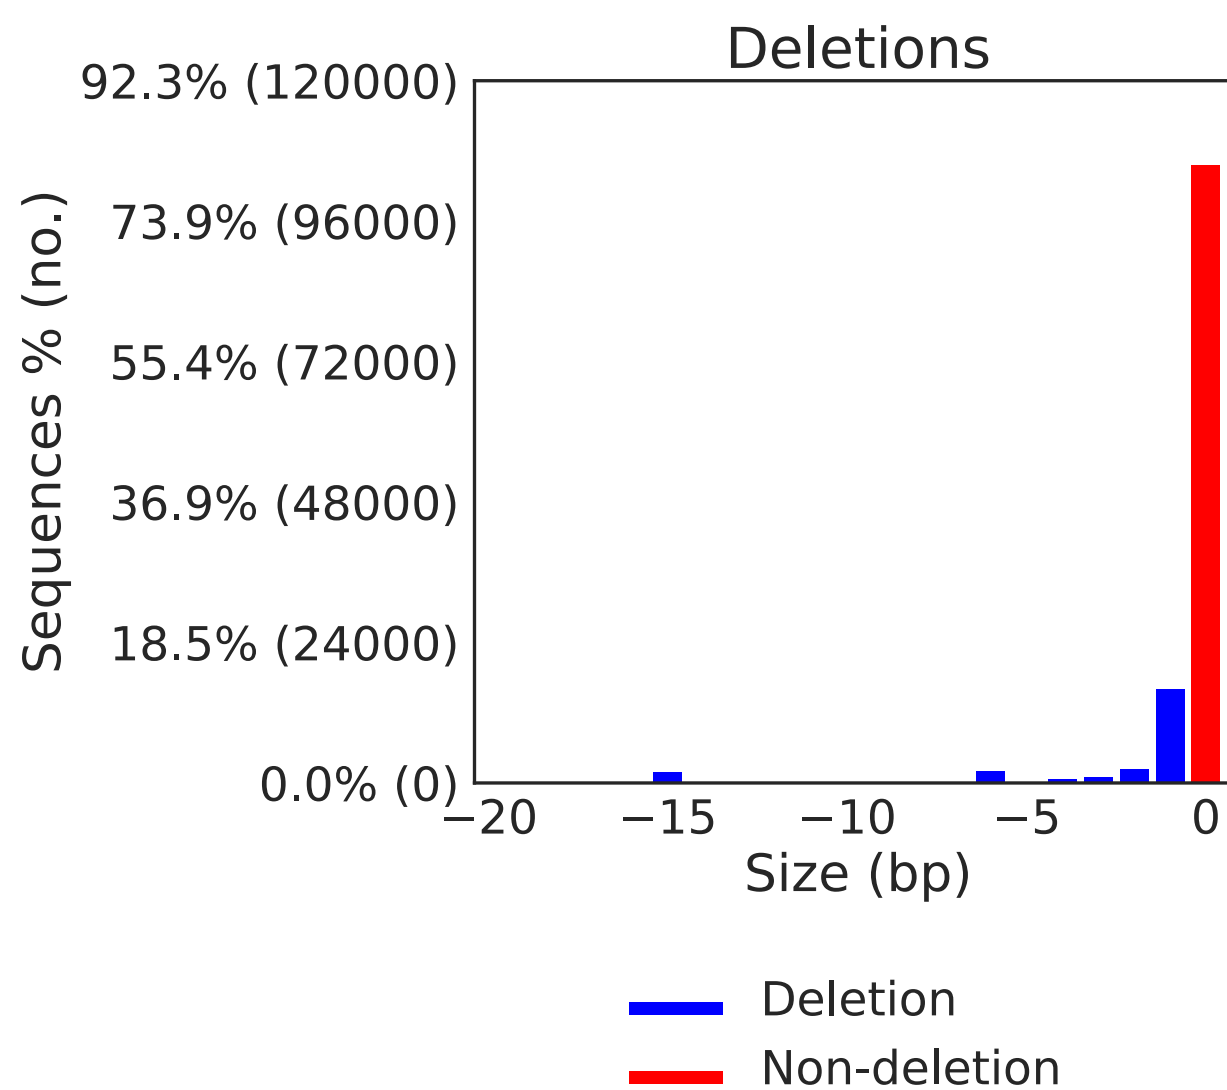

# *Tmc1*<sup>Bth/WT</sup>, SpCas9 + gRNA WT, Bth allele only

**bold** Substitutions  
  Insertions  
 - Deletions  
 - - - Predicted cleavage position

| Reference |   |   |   |   |   |   |   |   |   |   |   |   |   |   |   |          |          |   |          |                                                               |          |          |          |          |   |   |   |   |   |   |   |   |   |   |   |   |   |   |                   |                      |                   |                   |
|-----------|---|---|---|---|---|---|---|---|---|---|---|---|---|---|---|----------|----------|---|----------|---------------------------------------------------------------|----------|----------|----------|----------|---|---|---|---|---|---|---|---|---|---|---|---|---|---|-------------------|----------------------|-------------------|-------------------|
| A         | T | G | G | T | A | A | T | G | T | C | C | C | T | C | C | T        | G        | G | G        | G                                                             | <b>A</b> | T        | G        | T        | T | C | T | G | T | C | C | C | A | C | C | C | T | G | T                 | 24.52% (15374 reads) |                   |                   |
| A         | T | G | G | T | A | A | T | G | T | C | C | C | T | C | C | T        | -        | G | G        | G                                                             | <b>A</b> | <b>A</b> | G        | T        | T | C | T | G | T | C | C | C | A | C | C | C | T | G | T                 | 24.26% (15210 reads) |                   |                   |
| A         | T | G | G | T | A | A | T | G | T | C | C | C | T | C | C | T        | G        | G | G        | G                                                             | <b>A</b> | <b>A</b> | G        | T        | T | C | T | G | T | C | C | C | A | C | C | C | T | G | T                 | 20.00% (12536 reads) |                   |                   |
| A         | T | G | G | T | A | A | T | G | T | C | C | C | T | C | C | T        | G        | G | G        | -                                                             | -        | <b>A</b> | G        | T        | T | C | T | G | T | C | C | C | A | C | C | C | T | G | T                 | 5.89% (3691 reads)   |                   |                   |
| A         | T | G | G | T | A | A | T | G | T | C | C | C | T | C | C | T        | G        | G | G        | <b>A</b>                                                      | -        | -        | G        | T        | T | C | T | G | T | C | C | C | A | C | C | C | T | G | T                 | 5.83% (3652 reads)   |                   |                   |
| A         | T | G | G | T | A | A | T | G | T | C | C | C | T | C | C | T        | G        | G | -        | -                                                             | <b>A</b> | <b>A</b> | G        | T        | T | C | T | G | T | C | C | C | A | C | C | C | T | G | T                 | 2.45% (1539 reads)   |                   |                   |
| A         | T | G | G | T | A | A | T | G | T | C | C | C | T | C | C | T        | -        | - | G        | G                                                             | <b>A</b> | <b>A</b> | G        | T        | T | C | T | G | T | C | C | C | A | C | C | C | T | G | T                 | 2.32% (1456 reads)   |                   |                   |
| A         | T | G | G | T | A | A | T | G | T | C | C | C | T | C | C | -        | -        | - | -        | G                                                             | <b>A</b> | <b>A</b> | G        | T        | T | C | T | G | T | C | C | C | A | C | C | C | T | G | T                 | 1.48% (927 reads)    |                   |                   |
| A         | T | G | G | T | A | A | T | G | T | C | C | C | T | C | - | -        | -        | - | -        | G                                                             | <b>A</b> | <b>A</b> | G        | T        | T | C | T | G | T | C | C | C | A | C | C | C | T | G | T                 | 1.14% (716 reads)    |                   |                   |
| A         | T | G | G | T | A | A | T | G | T | C | C | C | T | C | C | T        | G        | G | G        | <b>A</b>                                                      | <b>A</b> | <b>A</b> | G        | T        | T | C | T | G | T | C | C | C | A | C | C | C | T | G | T                 | 0.76% (476 reads)    |                   |                   |
| A         | T | G | G | T | A | A | T | G | T | C | C | C | T | C | C | T        | -        | - | -        | G                                                             | <b>A</b> | <b>A</b> | G        | T        | T | C | T | G | T | C | C | C | A | C | C | C | T | G | T                 | 0.64% (399 reads)    |                   |                   |
| A         | T | G | G | T | A | A | T | G | T | C | C | C | T | C | C | T        | G        | - | -        | -                                                             | <b>A</b> | <b>A</b> | G        | T        | T | C | T | G | T | C | C | C | A | C | C | C | T | G | T                 | 0.62% (390 reads)    |                   |                   |
| A         | T | G | G | T | A | A | T | G | T | C | C | C | T | C | C | T        | G        | G | G        | <span style="border: 1px solid red; padding: 0 2px;">A</span> | G        | <b>A</b> | <b>A</b> | G        | T | T | C | T | G | T | C | C | C | A | C | C | C | T | G                 | T                    | 0.53% (334 reads) |                   |
| A         | T | G | G | T | A | A | T | G | T | C | C | C | T | C | C | T        | G        | G | G        | G                                                             | <b>A</b> | -        | G        | T        | T | C | T | G | T | C | C | C | A | C | C | C | T | G | T                 | 0.39% (243 reads)    |                   |                   |
| A         | T | G | G | T | A | A | T | G | T | C | C | C | - | - | - | -        | -        | - | -        | G                                                             | <b>A</b> | <b>A</b> | G        | T        | T | C | T | G | T | C | C | C | A | C | C | C | T | G | T                 | 0.38% (238 reads)    |                   |                   |
| A         | T | G | G | T | A | A | T | G | T | C | C | C | T | C | C | T        | G        | G | G        | <span style="border: 1px solid red; padding: 0 2px;">T</span> | G        | <b>A</b> | <b>A</b> | G        | T | T | C | T | G | T | C | C | C | A | C | C | C | T | G                 | T                    | 0.37% (232 reads) |                   |
| A         | T | G | G | T | A | A | T | G | T | C | C | C | T | C | C | -        | -        | - | -        | <b>A</b>                                                      | <b>A</b> | G        | T        | T        | C | T | G | T | C | C | C | A | C | C | C | T | G | T | 0.31% (195 reads) |                      |                   |                   |
| A         | T | G | G | T | A | A | T | G | T | C | C | C | T | C | C | T        | G        | G | G        | <b>T</b>                                                      | <b>A</b> | -        | G        | T        | T | C | T | G | T | C | C | C | A | C | C | C | T | G | T                 | 0.28% (178 reads)    |                   |                   |
| A         | T | G | G | T | A | A | T | G | T | C | C | C | T | C | C | <b>A</b> | G        | - | -        | -                                                             | -        | -        | -        | T        | T | C | T | G | T | C | C | C | A | C | C | C | T | G | T                 | 0.25% (156 reads)    |                   |                   |
| A         | T | G | G | T | A | A | T | G | T | C | C | C | T | C | C | T        | G        | G | G        | <span style="border: 1px solid red; padding: 0 2px;">A</span> | <b>A</b> | G        | <b>A</b> | <b>A</b> | G | T | T | C | T | G | T | C | C | C | A | C | C | C | T                 | G                    | T                 | 0.25% (155 reads) |
| A         | T | G | G | T | A | A | T | G | T | C | C | C | T | - | - | -        | -        | - | -        | G                                                             | <b>A</b> | <b>A</b> | G        | T        | T | C | T | G | T | C | C | C | A | C | C | C | T | G | T                 | 0.24% (148 reads)    |                   |                   |
| A         | T | G | G | T | A | A | T | G | T | C | C | C | T | C | C | -        | -        | - | -        | -                                                             | <b>A</b> | G        | T        | T        | C | T | G | T | C | C | C | A | C | C | C | T | G | T | 0.23% (147 reads) |                      |                   |                   |
| A         | T | G | G | T | A | A | T | G | T | C | C | C | T | C | C | T        | G        | G | <b>A</b> | G                                                             | -        | -        | -        | T        | T | C | T | G | T | C | C | C | A | C | C | C | T | G | T                 | 0.22% (140 reads)    |                   |                   |
| A         | T | G | G | T | A | A | T | G | T | C | C | C | T | C | C | T        | <b>A</b> | G | -        | -                                                             | -        | -        | -        | T        | T | C | T | G | T | C | C | C | A | C | C | C | T | G | T                 | 0.21% (131 reads)    |                   |                   |
| A         | T | G | G | T | A | A | T | G | T | C | C | C | T | C | C | T        | G        | G | -        | -                                                             | -        | <b>A</b> | G        | T        | T | C | T | G | T | C | C | C | A | C | C | C | T | G | T                 | 0.21% (129 reads)    |                   |                   |

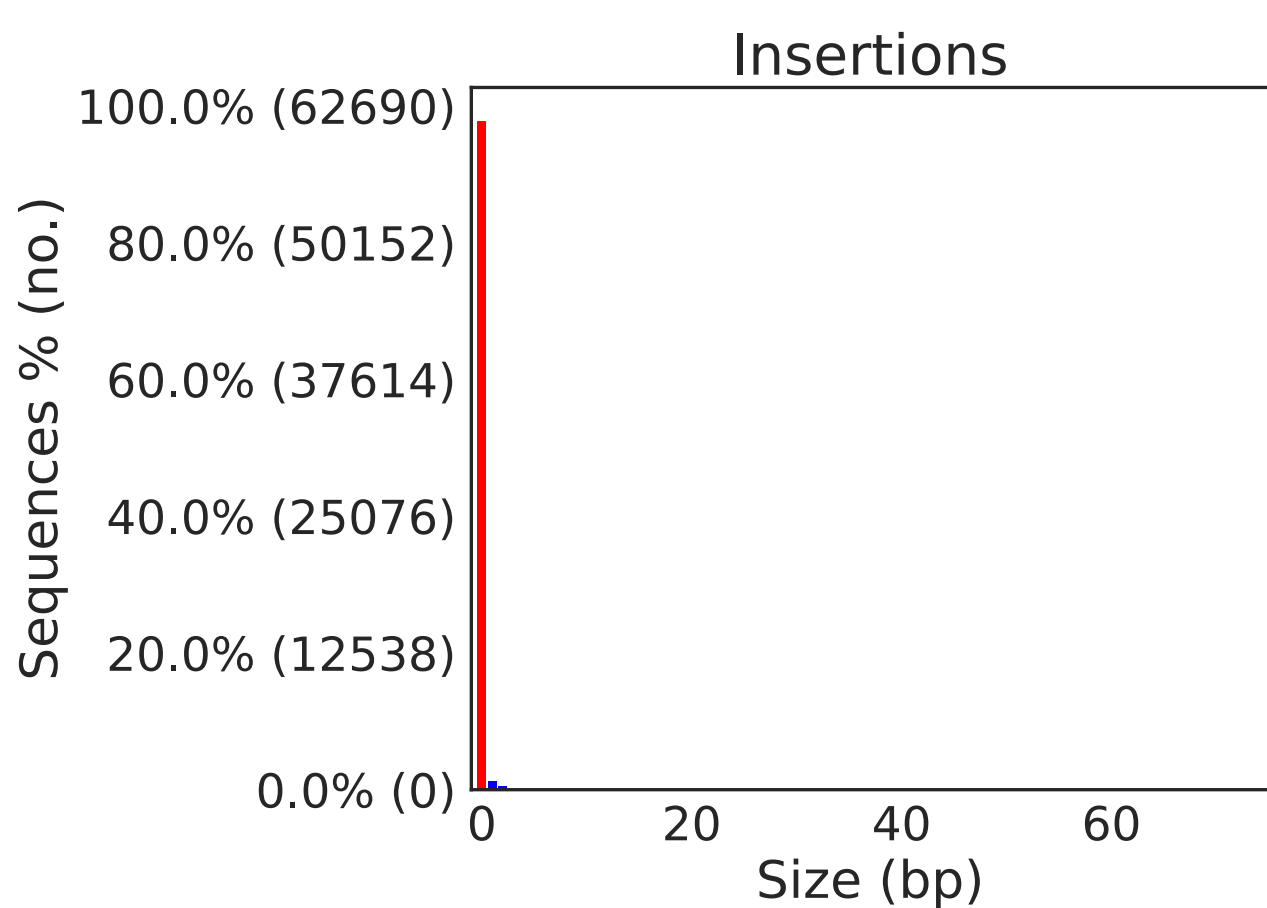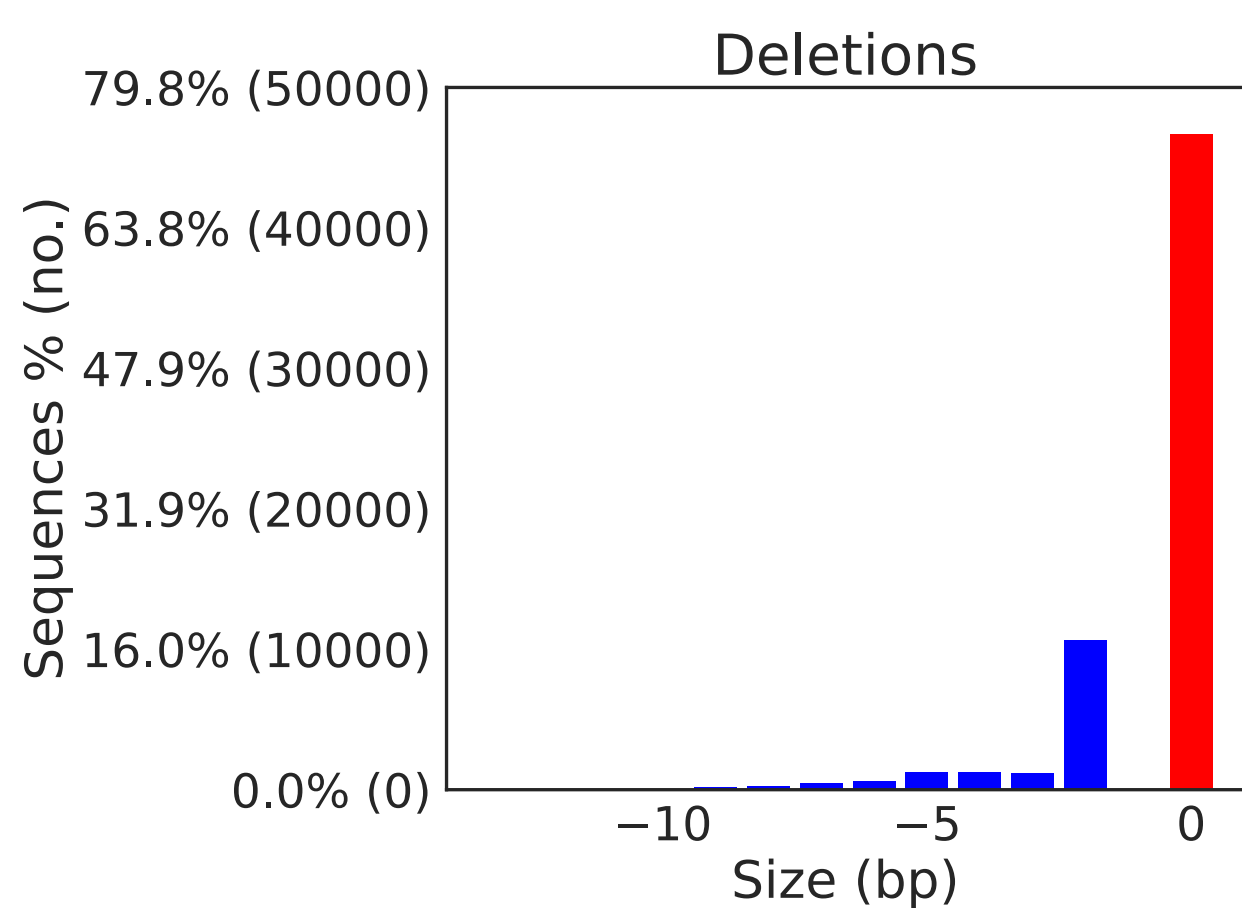

█ Insertion  
█ Non-insertion

█ Deletion  
█ Non-deletion



# *Tmc1*<sup>Bth/WT</sup>, SpCas9 + gRNA WT, WT allele only

**bold** Substitutions  
  Insertions  
 - Deletions  
 - - - Predicted cleavage position

| Reference |   |   |   |   |   |   |   |   |   |   |   |   |   |   |   |   |   |   |   |                                                               |   |   |   |   |   |   |   |   |   |   |   |   |   |   |   |   |   |   |                   |                      |                   |
|-----------|---|---|---|---|---|---|---|---|---|---|---|---|---|---|---|---|---|---|---|---------------------------------------------------------------|---|---|---|---|---|---|---|---|---|---|---|---|---|---|---|---|---|---|-------------------|----------------------|-------------------|
| A         | T | G | G | T | A | A | T | G | T | C | C | C | T | C | C | T | G | G | G | G                                                             | A | T | G | T | T | C | T | G | T | C | C | C | A | C | C | C | T | G | T                 | 29.30% (17857 reads) |                   |
| A         | T | G | G | T | A | A | T | G | T | C | C | C | T | C | C | T | - | G | G | G                                                             | A | T | G | T | T | C | T | G | T | C | C | C | A | C | C | C | T | G | T                 | 28.68% (17475 reads) |                   |
| A         | T | G | G | T | A | A | T | G | T | C | C | C | T | C | C | T | G | G | G | -                                                             | - | T | G | T | T | C | T | G | T | C | C | C | A | C | C | C | T | G | T                 | 19.41% (11827 reads) |                   |
| A         | T | G | G | T | A | A | T | G | T | C | C | C | T | C | C | T | G | G | G | G                                                             | A | T | G | T | T | C | T | G | T | C | C | C | A | C | C | C | T | G | T                 | 3.36% (2045 reads)   |                   |
| A         | T | G | G | T | A | A | T | G | T | C | C | C | T | C | C | T | G | G | - | -                                                             | A | T | G | T | T | C | T | G | T | C | C | C | A | C | C | C | T | G | T                 | 2.88% (1757 reads)   |                   |
| A         | T | G | G | T | A | A | T | G | T | C | C | C | T | C | C | T | - | - | G | G                                                             | A | T | G | T | T | C | T | G | T | C | C | C | A | C | C | C | T | G | T                 | 2.63% (1602 reads)   |                   |
| A         | T | G | G | T | A | A | T | G | T | C | C | C | T | C | C | T | G | - | - | -                                                             | - | - | - | T | T | C | T | G | T | C | C | C | A | C | C | C | T | G | T                 | 1.36% (830 reads)    |                   |
| A         | T | G | G | T | A | A | T | G | T | C | C | C | T | C | C | - | - | - | - | -                                                             | - | T | G | T | T | C | T | G | T | C | C | C | A | C | C | C | T | G | T                 | 1.33% (810 reads)    |                   |
| A         | T | G | G | T | A | A | T | G | T | C | C | C | T | C | C | - | - | - | - | G                                                             | A | T | G | T | T | C | T | G | T | C | C | C | A | C | C | C | T | G | T                 | 1.18% (718 reads)    |                   |
| A         | T | G | G | T | A | A | T | G | T | C | C | C | T | C | C | T | - | - | - | G                                                             | A | T | G | T | T | C | T | G | T | C | C | C | A | C | C | C | T | G | T                 | 0.75% (460 reads)    |                   |
| A         | T | G | G | T | A | A | T | G | T | C | C | C | T | C | C | - | - | - | - | G                                                             | A | T | G | T | T | C | T | G | T | C | C | C | A | C | C | C | T | G | T                 | 0.75% (459 reads)    |                   |
| A         | T | G | G | T | A | A | T | G | T | C | C | C | T | C | C | T | G | - | - | -                                                             | A | T | G | T | T | C | T | G | T | C | C | C | A | C | C | C | T | G | T                 | 0.73% (447 reads)    |                   |
| A         | T | G | G | T | A | A | T | G | T | C | C | C | T | C | C | T | G | G | G | <span style="border: 1px solid red; padding: 0 2px;">A</span> | G | A | T | G | T | T | C | T | G | T | C | C | C | A | C | C | C | T | G                 | T                    | 0.41% (252 reads) |
| A         | T | G | G | T | A | A | T | G | T | C | C | C | T | C | C | T | G | G | - | -                                                             | - | T | G | T | T | C | T | G | T | C | C | C | A | C | C | C | T | G | T                 | 0.35% (213 reads)    |                   |
| A         | T | G | G | T | A | A | T | G | T | C | C | C | T | - | - | - | - | - | - | G                                                             | A | T | G | T | T | C | T | G | T | C | C | C | A | C | C | C | T | G | T                 | 0.33% (200 reads)    |                   |
| A         | T | G | G | T | A | A | T | G | T | C | C | C | T | C | C | T | G | G | G | -                                                             | T | G | T | T | C | T | G | T | C | C | C | A | C | C | C | T | G | T | 0.25% (154 reads) |                      |                   |
| A         | T | G | G | T | A | A | T | G | T | C | C | C | T | - | - | - | - | - | - | -                                                             | - | G | T | T | C | T | G | T | C | C | C | A | C | C | C | T | G | T | 0.22% (134 reads) |                      |                   |
| A         | T | G | G | T | A | A | T | G | T | C | C | C | T | C | C | T | G | - | - | -                                                             | - | T | G | T | T | C | T | G | T | C | C | C | A | C | C | C | T | G | T                 | 0.21% (127 reads)    |                   |

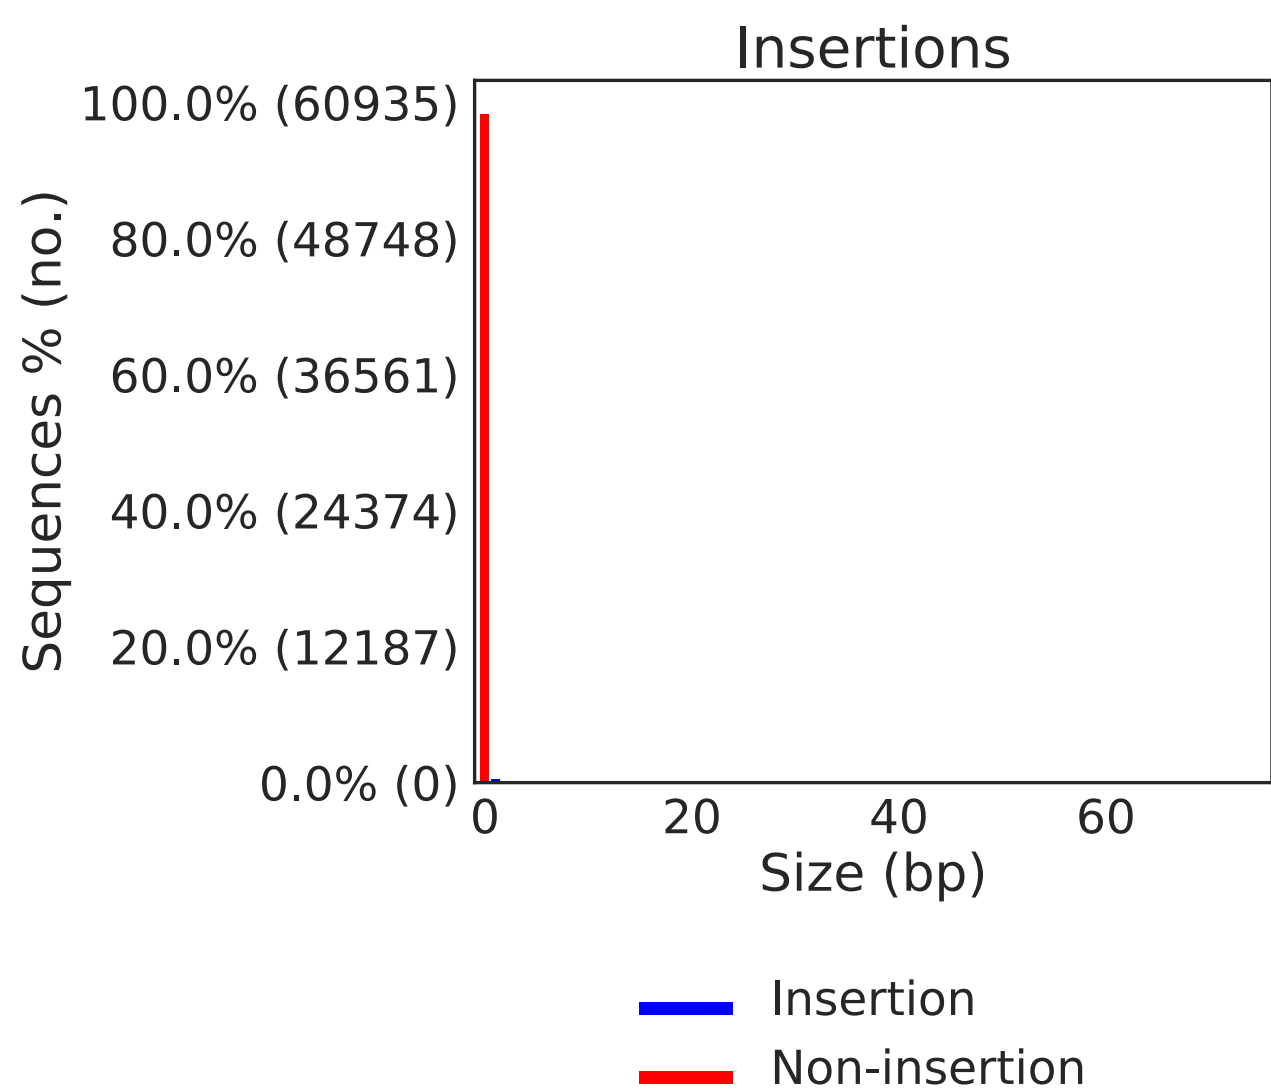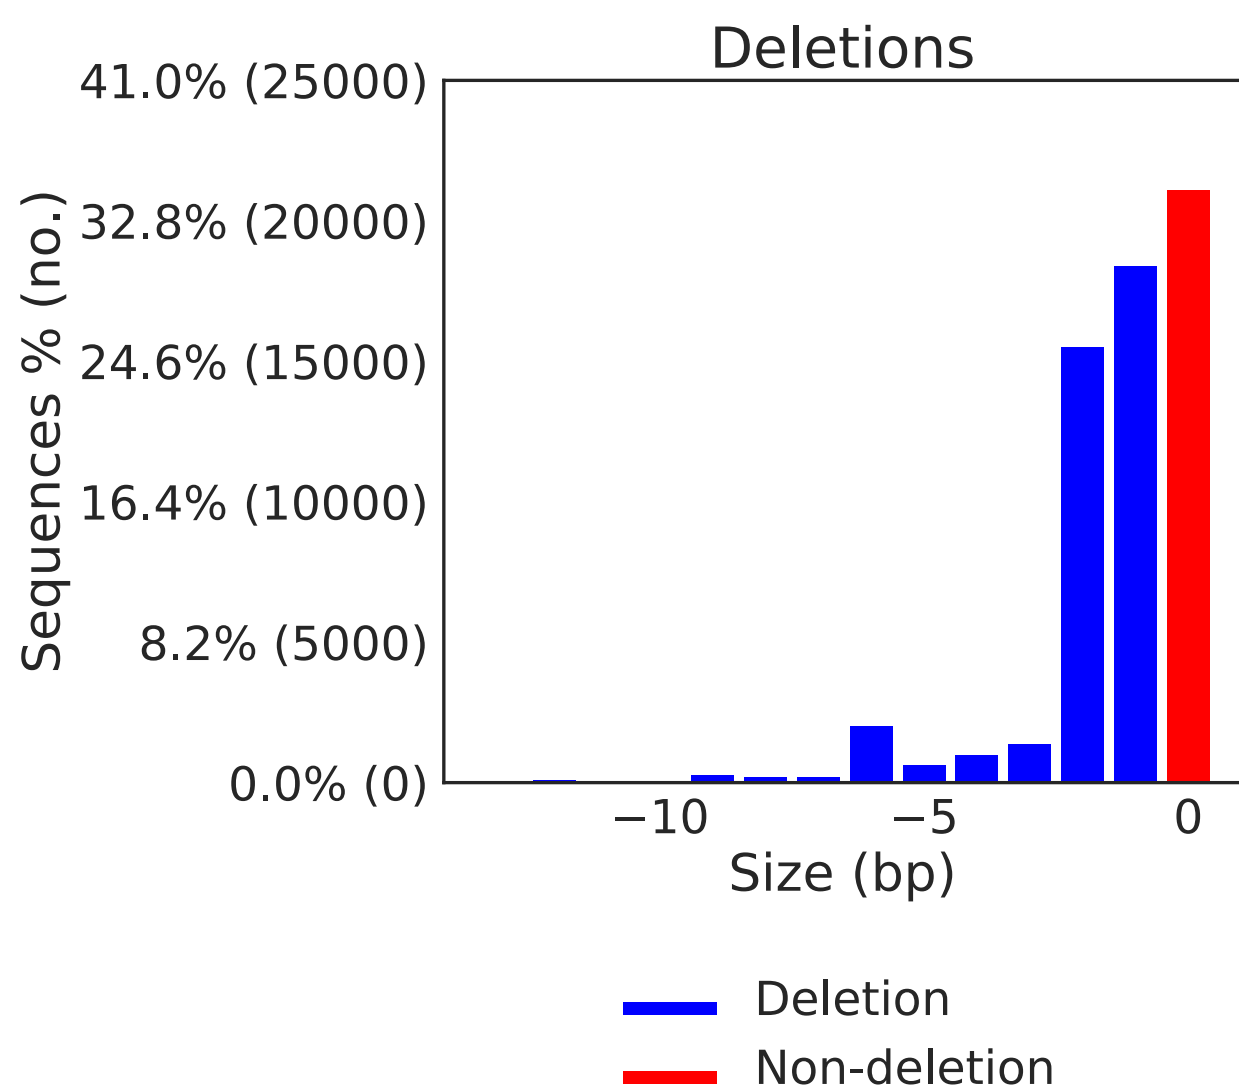

# *Tmc1*<sup>WT/WT</sup>, SpCas9 only

**bold** Substitutions  
 Insertions  
 - Deletions  
 - - - Predicted cleavage position

A T G G T A A T G T C C C T C C T G G G G A A G T T C T G T C C C A C C C T G T Reference  
 A T G G T A A T G T C C C T C C T G G G **G** A **T** G T T C T G T C C C A C C C T G T 97.75% (212831 reads)

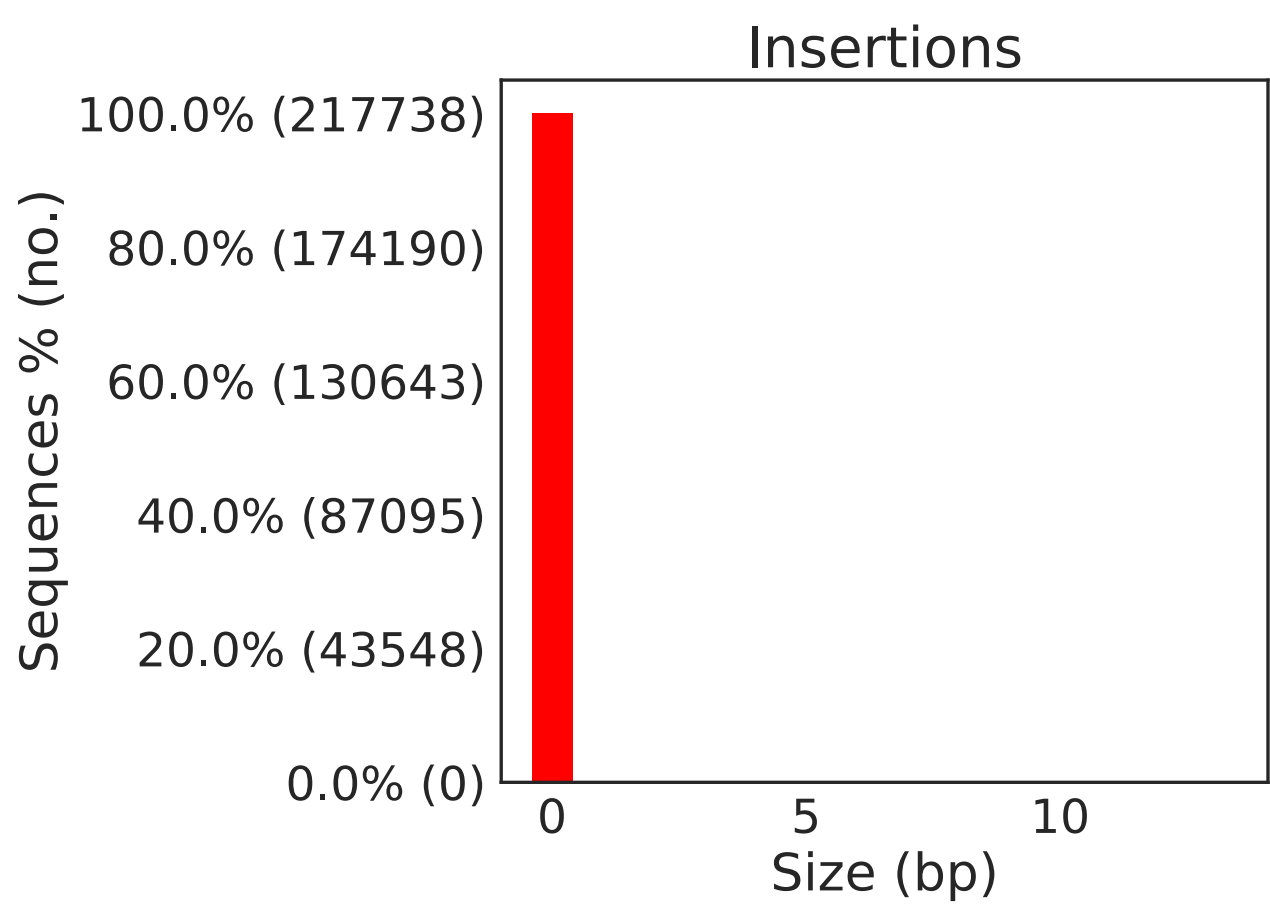

— Insertion  
— Non-insertion

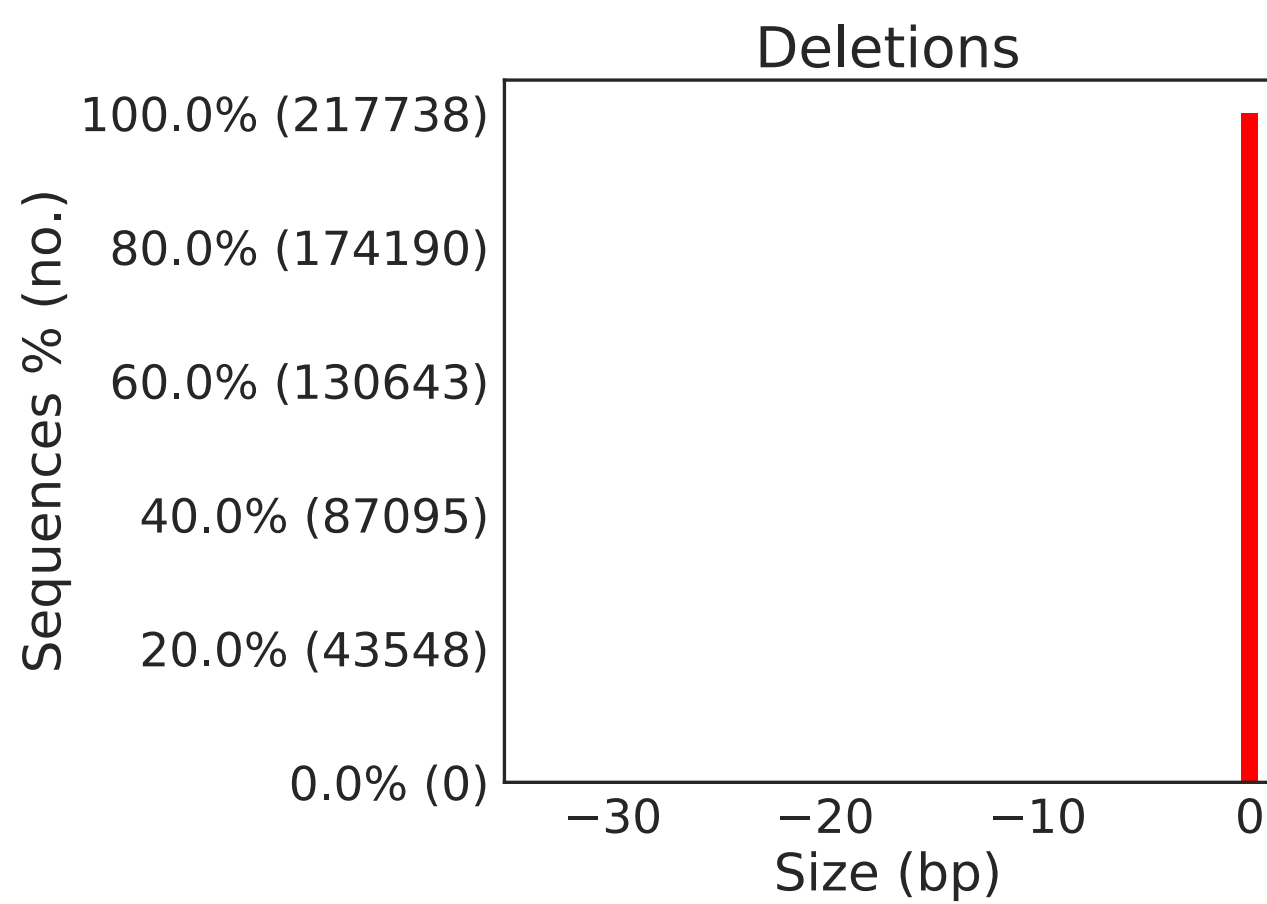

— Deletion  
— Non-deletion



# *Tmc1*<sup>WT/WT</sup>, SpCas9 + gRNA 1.1

**bold** Substitutions  
 Insertions  
 - Deletions  
 - - - Predicted cleavage position

| Reference |   |   |   |          |   |   |   |   |   |   |   |   |   |   |   |   |   |   |          |          |   |          |   |   |   |   |   |   |   |   |   |   |   |   |   |   |   |   |                    |                       |
|-----------|---|---|---|----------|---|---|---|---|---|---|---|---|---|---|---|---|---|---|----------|----------|---|----------|---|---|---|---|---|---|---|---|---|---|---|---|---|---|---|---|--------------------|-----------------------|
| A         | T | G | G | T        | A | A | T | G | T | C | C | C | T | C | C | T | G | G | G        | G        | A | A        | G | T | T | C | T | G | T | C | C | C | A | C | C | C | T | G | T                  | 71.19% (121524 reads) |
| A         | T | G | G | T        | A | A | T | G | T | C | C | C | T | C | C | T | G | G | G        | -        | A | <b>T</b> | G | T | T | C | T | G | T | C | C | C | A | C | C | C | T | G | T                  | 5.71% (9740 reads)    |
| A         | T | G | G | T        | A | A | T | G | T | C | C | C | T | C | C | T | - | G | G        | G        | A | <b>T</b> | G | T | T | C | T | G | T | C | C | C | A | C | C | C | T | G | T                  | 5.03% (8593 reads)    |
| A         | T | G | G | T        | A | A | T | G | T | C | C | C | T | C | C | T | G | G | G        | <b>T</b> | - | -        | G | T | T | C | T | G | T | C | C | C | A | C | C | C | T | G | T                  | 2.89% (4927 reads)    |
| A         | T | G | G | T        | A | A | T | G | T | C | C | C | T | C | C | T | G | G | G        | -        | - | <b>T</b> | G | T | T | C | T | G | T | C | C | C | A | C | C | C | T | G | T                  | 2.50% (4273 reads)    |
| A         | T | G | G | T        | A | A | T | G | T | C | C | C | T | C | C | T | G | G | G        | -        | - | -        | - | - | T | C | T | G | T | C | C | C | A | C | C | C | T | G | T                  | 1.53% (2612 reads)    |
| A         | T | G | G | T        | A | A | T | G | T | C | C | C | T | C | C | T | G | G | G        | G        | A | A        | G | T | T | C | T | G | T | C | C | C | A | C | C | C | T | G | T                  | 1.04% (1778 reads)    |
| A         | T | G | G | T        | A | A | T | G | T | C | C | C | T | C | C | T | G | G | G        | -        | - | -        | - | - | C | T | G | T | C | C | C | A | C | C | C | T | G | T | 1.03% (1752 reads) |                       |
| A         | T | G | G | T        | A | A | T | G | T | C | C | C | T | C | C | T | G | G | G        | G        | - | -        | - | T | T | C | T | G | T | C | C | C | A | C | C | C | T | G | T                  | 0.95% (1626 reads)    |
| A         | T | G | G | T        | A | A | T | G | T | C | C | C | T | C | C | T | G | G | G        | -        | - | -        | G | T | T | C | T | G | T | C | C | C | A | C | C | C | T | G | T                  | 0.87% (1491 reads)    |
| A         | T | G | G | T        | A | A | T | G | T | C | C | C | T | C | C | T | G | G | -        | -        | A | <b>T</b> | G | T | T | C | T | G | T | C | C | C | A | C | C | C | T | G | T                  | 0.67% (1140 reads)    |
| A         | T | G | G | T        | A | A | T | G | T | C | C | C | T | C | C | T | - | - | G        | G        | A | <b>T</b> | G | T | T | C | T | G | T | C | C | C | A | C | C | C | T | G | T                  | 0.56% (955 reads)     |
| A         | T | G | G | T        | A | A | T | G | T | C | C | C | T | C | C | T | G | G | <b>T</b> | G        | - | -        | - | T | T | C | T | G | T | C | C | C | A | C | C | C | T | G | T                  | 0.31% (528 reads)     |
| A         | T | G | G | <b>C</b> | A | A | T | G | T | C | C | C | T | C | C | T | G | G | G        | G        | A | <b>T</b> | G | T | T | C | T | G | T | C | C | C | A | C | C | C | T | G | T                  | 0.28% (484 reads)     |
| A         | T | G | G | T        | A | A | T | G | T | C | C | C | T | C | C | T | G | G | -        | -        | - | <b>T</b> | G | T | T | C | T | G | T | C | C | C | A | C | C | C | T | G | T                  | 0.26% (452 reads)     |
| A         | T | G | G | T        | A | A | T | G | T | C | C | C | T | C | C | T | G | G | -        | -        | - | -        | - | - | - | - | - | - | - | - | - | - | - | - | - | - | - | - | -                  | 0.22% (372 reads)     |
| A         | T | G | G | T        | A | A | T | G | T | C | C | C | T | C | C | T | G | G | G        | -        | - | -        | - | - | - | - | T | G | T | C | C | C | A | C | C | C | T | G | T                  | 0.21% (357 reads)     |

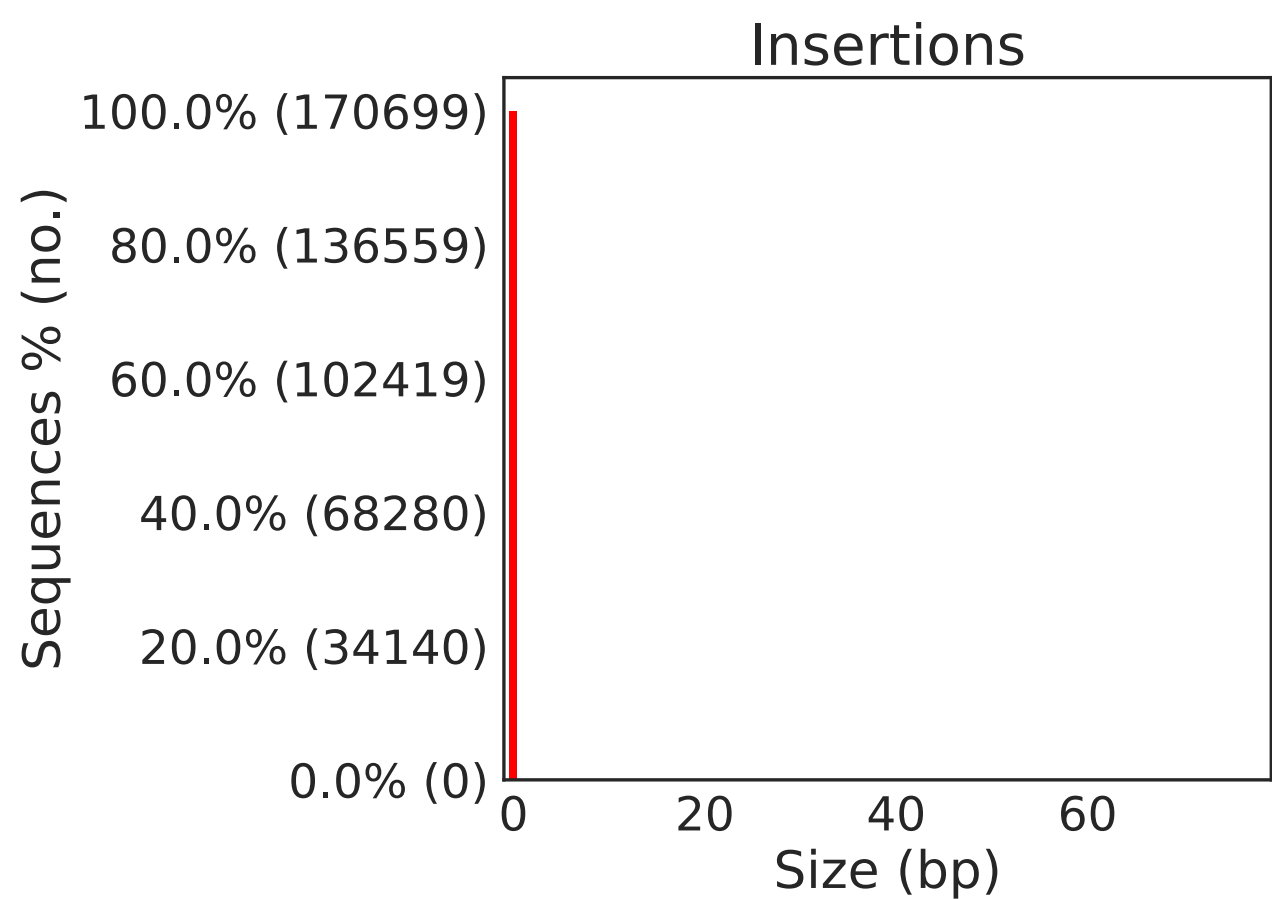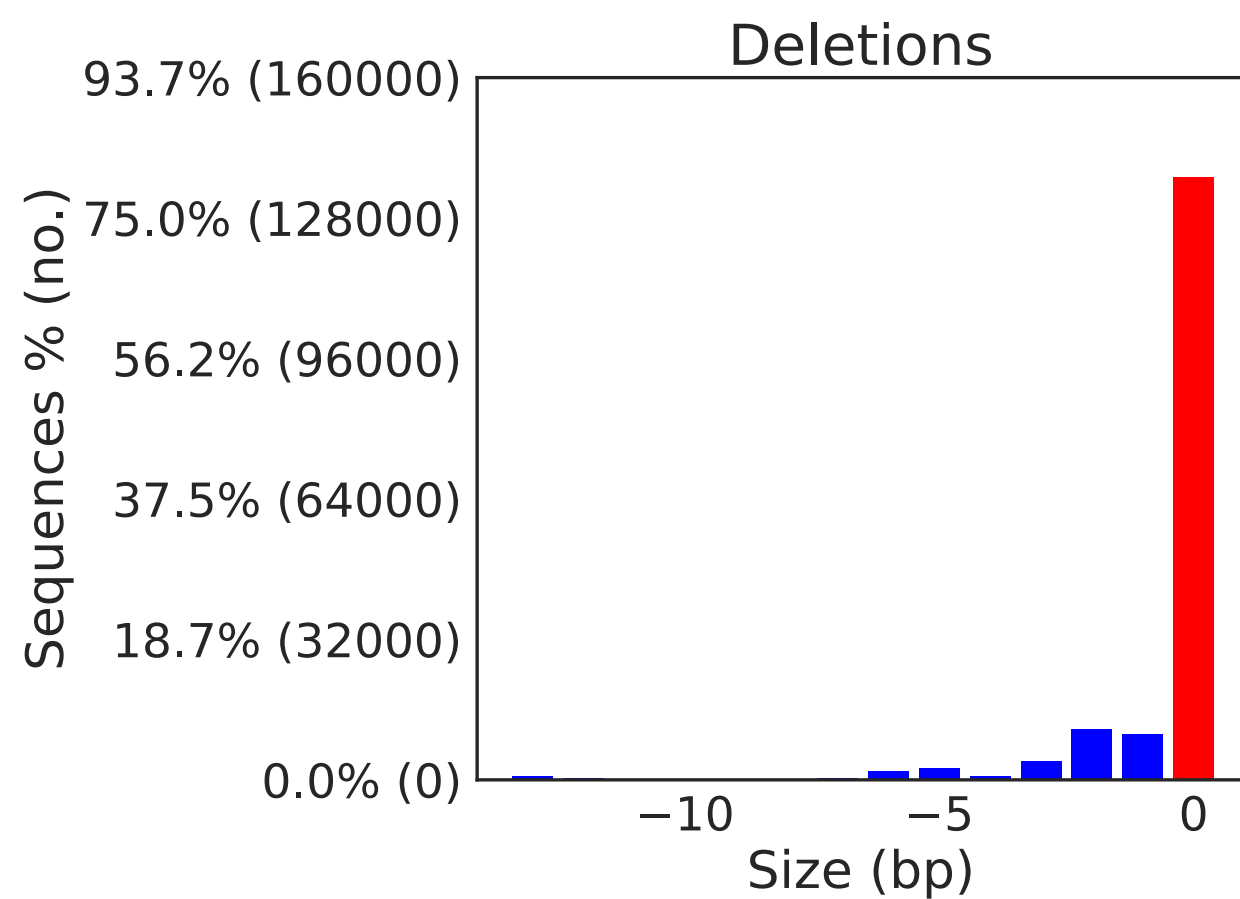

■ Insertion  
 ■ Non-insertion

■ Deletion  
 ■ Non-deletion

# *Tmc1*<sup>WT/WT</sup>, SpCas9 + gRNA 2.1

**bold** Substitutions  
 Insertions  
 - Deletions  
 - - - Predicted cleavage position

| Reference |   |   |   |   |   |   |   |   |   |   |   |   |   |   |   |   |   |   |   |   |          |   |   |   |          |   |   |   |   |   |   |   |   |   |   |   |   |   |                   |                      |                   |                   |
|-----------|---|---|---|---|---|---|---|---|---|---|---|---|---|---|---|---|---|---|---|---|----------|---|---|---|----------|---|---|---|---|---|---|---|---|---|---|---|---|---|-------------------|----------------------|-------------------|-------------------|
| A         | A | C | A | T | G | G | T | A | A | T | G | T | C | C | C | T | C | C | T | G | G        | G | G | A | A        | G | T | T | C | T | G | T | C | C | C | A | C | C | C                 | 81.91% (75262 reads) |                   |                   |
| A         | A | C | A | T | G | G | T | A | A | T | G | T | C | C | C | T | C | C | - | G | G        | G | G | A | <b>T</b> | G | T | T | C | T | G | T | C | C | C | A | C | C | C                 | 3.37% (3095 reads)   |                   |                   |
| A         | A | C | A | T | G | G | T | A | A | T | G | T | C | C | C | T | C | C | T | G | G        | G | G | A | A        | G | T | T | C | T | G | T | C | C | C | A | C | C | C                 | 2.45% (2249 reads)   |                   |                   |
| A         | A | C | A | T | G | G | T | A | A | T | G | T | C | C | C | T | C | C | T | G | G        | G | - | A | <b>T</b> | G | T | T | C | T | G | T | C | C | C | A | C | C | C                 | 1.31% (1206 reads)   |                   |                   |
| A         | A | C | A | T | G | G | T | A | A | T | G | T | C | C | C | T | C | - | - | G | G        | G | G | A | <b>T</b> | G | T | T | C | T | G | T | C | C | C | A | C | C | C                 | 1.25% (1147 reads)   |                   |                   |
| A         | A | C | A | T | G | G | T | A | A | T | G | T | C | C | C | T | C | C | T | - | G        | G | G | A | <b>T</b> | G | T | T | C | T | G | T | C | C | C | A | C | C | C                 | 1.23% (1133 reads)   |                   |                   |
| A         | A | C | A | T | G | G | T | A | A | T | G | T | C | C | C | T | C | C | T | G | -        | - | - | A | <b>T</b> | G | T | T | C | T | G | T | C | C | C | A | C | C | C                 | 0.60% (549 reads)    |                   |                   |
| A         | A | C | A | T | G | G | T | A | A | T | G | T | C | C | C | T | C | C | T | - | -        | - | - | A | <b>T</b> | G | T | T | C | T | G | T | C | C | C | A | C | C | C                 | 0.58% (529 reads)    |                   |                   |
| A         | A | C | A | T | G | G | T | A | A | T | G | T | C | C | C | T | C | C | T | - | -        | - | G | A | <b>T</b> | G | T | T | C | T | G | T | C | C | C | A | C | C | C                 | 0.56% (517 reads)    |                   |                   |
| A         | A | C | A | T | G | G | T | A | A | T | G | T | C | C | C | T | - | - | - | - | -        | - | - | - | G        | T | T | C | T | G | T | C | C | C | A | C | C | C | 0.55% (503 reads) |                      |                   |                   |
| A         | A | C | A | T | G | G | T | A | A | T | G | T | C | C | C | T | C | C | T | G | G        | G | - | - | A        | G | T | T | C | T | G | T | C | C | C | A | C | C | C                 | 0.32% (290 reads)    |                   |                   |
| A         | A | C | A | T | G | G | T | A | A | T | G | T | C | C | C | T | C | C | T | - | -        | - | - | - | -        | - | - | - | - | - | - | - | - | - | - | - | - | - | -                 | -                    | 0.30% (274 reads) |                   |
| A         | A | C | A | T | G | G | T | A | A | T | G | T | C | C | C | - | - | - | - | G | G        | G | G | A | <b>T</b> | G | T | T | C | T | G | T | C | C | C | A | C | C | C                 | 0.29% (270 reads)    |                   |                   |
| A         | A | C | A | T | G | G | T | A | A | T | G | T | C | C | C | T | C | - | - | - | -        | - | - | - | -        | - | - | - | - | - | - | - | - | - | - | - | - | - | -                 | -                    | 0.28% (257 reads) |                   |
| A         | A | C | A | T | G | G | T | A | A | T | G | T | C | C | C | T | C | C | T | G | <b>T</b> | - | - | - | -        | - | - | - | - | - | - | - | - | - | - | - | - | - | -                 | -                    | -                 | 0.27% (249 reads) |
| A         | A | C | A | T | G | G | T | A | A | T | G | T | C | C | C | T | C | C | T | G | -        | - | - | - | -        | - | - | - | - | - | - | - | - | - | - | - | - | - | -                 | -                    | -                 | 0.25% (233 reads) |
| A         | A | C | A | T | G | G | T | A | A | T | G | T | C | C | C | T | C | C | T | G | -        | - | - | - | -        | - | - | - | - | - | - | - | - | - | - | - | - | - | -                 | -                    | -                 | 0.25% (230 reads) |
| A         | A | C | A | T | G | G | T | A | A | T | G | T | C | C | C | T | C | C | - | - | -        | - | - | - | -        | - | - | - | - | - | - | - | - | - | - | - | - | - | -                 | -                    | -                 | 0.22% (198 reads) |

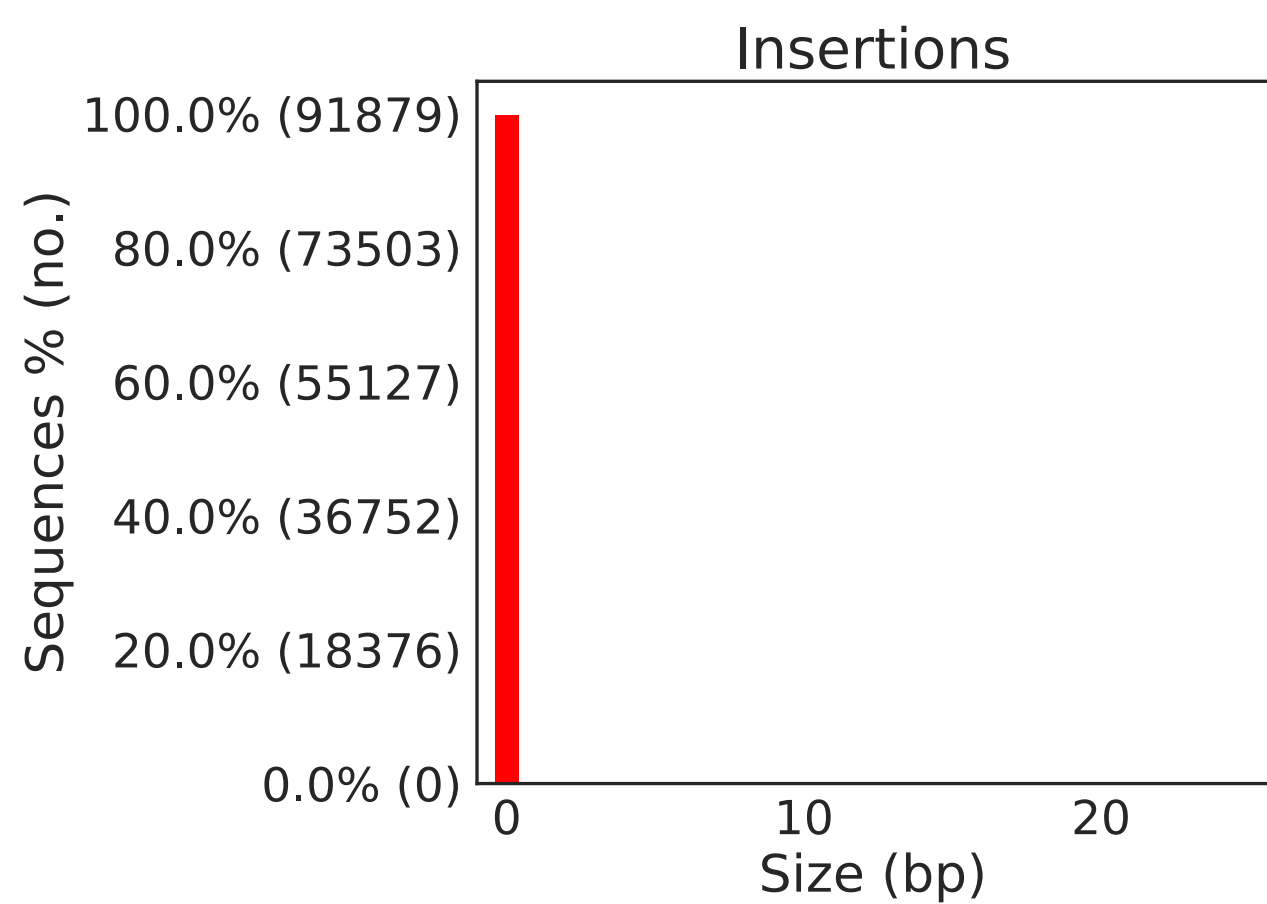

■ Insertion  
 ■ Non-insertion

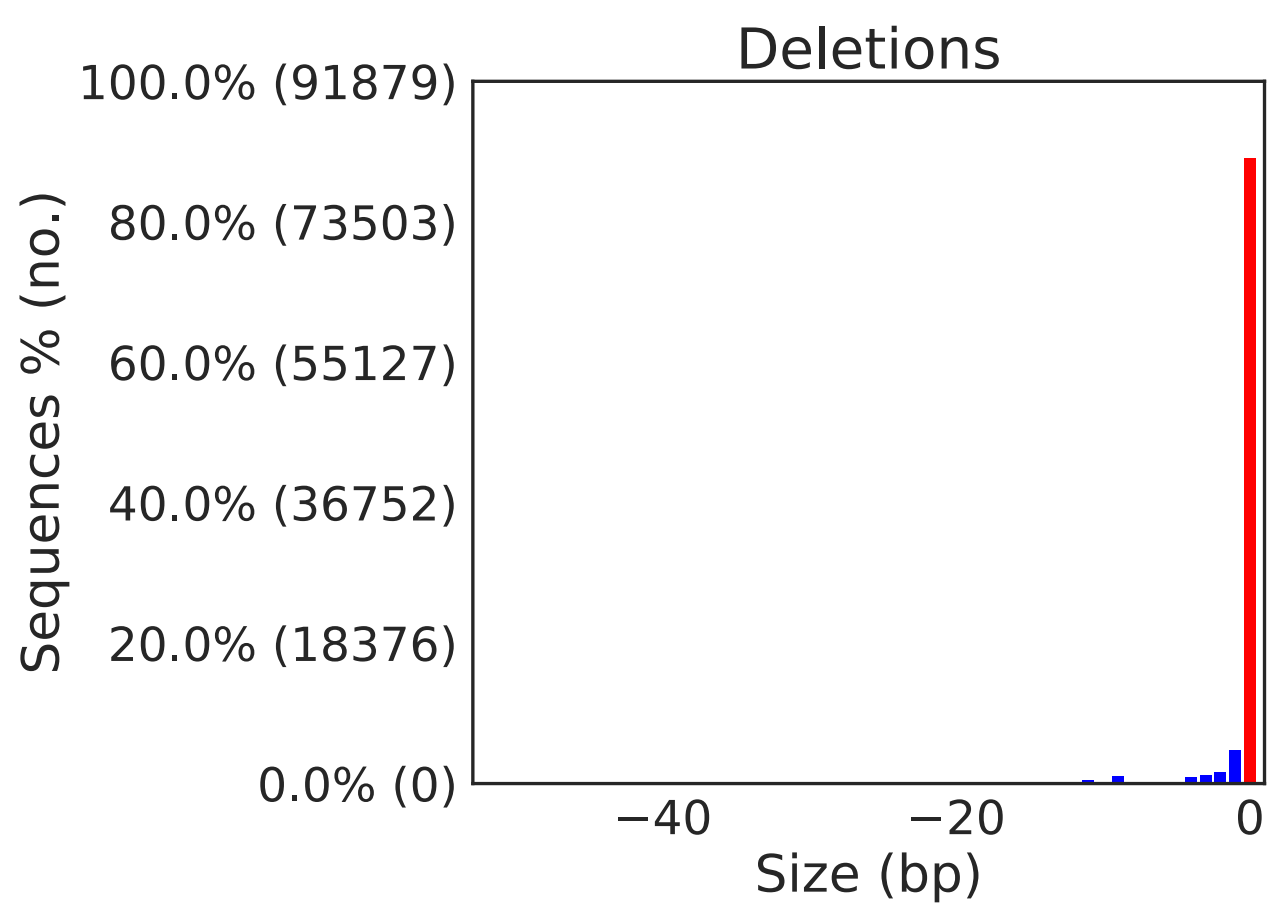

■ Deletion  
 ■ Non-deletion

# *Tmc1*<sup>WT/WT</sup>, SpCas9 + gRNA 2.4

**bold** Substitutions  
  Insertions  
 - Deletions  
 - - - Predicted cleavage position

|   |   |   |   |   |   |   |   |   |   |   |   |   |   |   |   |   |   |   |   |          |   |   |   |          |          |          |          |   |   |   |   |   |   |   |   |   |   |   |   |                       |                   |                    |
|---|---|---|---|---|---|---|---|---|---|---|---|---|---|---|---|---|---|---|---|----------|---|---|---|----------|----------|----------|----------|---|---|---|---|---|---|---|---|---|---|---|---|-----------------------|-------------------|--------------------|
| A | A | C | A | T | G | G | T | A | A | T | G | T | C | C | C | T | C | C | T | G        | G | G | G | A        | A        | G        | T        | T | C | T | G | T | C | C | C | A | C | C | C | Reference             |                   |                    |
| A | A | C | A | T | G | G | T | A | A | T | G | T | C | C | C | T | C | C | T | <b>G</b> | G | G | G | A        | <b>T</b> | G        | T        | T | C | T | G | T | C | C | C | A | C | C | C | 82.51% (187593 reads) |                   |                    |
| A | A | C | A | T | G | G | T | A | A | T | G | T | C | C | C | T | C | C | T | G        | G | G | - | A        | <b>T</b> | G        | T        | T | C | T | G | T | C | C | C | A | C | C | C | 3.61% (8203 reads)    |                   |                    |
| A | A | C | A | T | G | G | T | A | A | T | G | T | C | C | C | T | C | C | T | -        | G | G | G | A        | <b>T</b> | G        | T        | T | C | T | G | T | C | C | C | A | C | C | C | 3.51% (7987 reads)    |                   |                    |
| A | A | C | A | T | G | G | T | A | A | T | G | T | C | C | C | T | C | C | - | G        | G | G | G | A        | <b>T</b> | G        | T        | T | C | T | G | T | C | C | C | A | C | C | C | 2.11% (4789 reads)    |                   |                    |
| A | A | C | A | T | G | G | T | A | A | T | G | T | C | C | C | T | C | C | T | <b>G</b> | G | G | G | A        | A        | G        | T        | T | C | T | G | T | C | C | C | A | C | C | C | 0.92% (2098 reads)    |                   |                    |
| A | A | C | A | T | G | G | T | A | A | T | G | T | C | C | C | T | C | C | T | G        | - | - | - | -        | -        | -        | -        | - | - | - | C | T | G | T | C | C | C | A | C | C                     | C                 | 0.78% (1763 reads) |
| A | A | C | A | T | G | G | T | A | A | T | G | T | C | C | C | T | C | C | T | -        | - | - | - | A        | <b>T</b> | G        | T        | T | C | T | G | T | C | C | C | A | C | C | C | 0.43% (982 reads)     |                   |                    |
| A | A | C | A | T | G | G | T | A | A | T | G | T | C | C | C | T | C | C | T | <b>G</b> | G | G | G | <b>G</b> | A        | <b>T</b> | <b>G</b> | T | T | C | T | G | T | C | C | C | A | C | C | C                     | 0.34% (772 reads) |                    |
| A | A | C | A | T | G | G | T | A | A | T | G | T | C | C | C | T | C | C | T | <b>G</b> | G | G | G | A        | <b>T</b> | G        | T        | T | C | T | G | T | C | C | C | A | C | C | C | 0.34% (766 reads)     |                   |                    |
| A | A | C | A | T | G | G | T | A | A | T | G | T | C | C | C | T | C | C | - | -        | - | G | G | A        | <b>T</b> | G        | T        | T | C | T | G | T | C | C | C | A | C | C | C | 0.29% (649 reads)     |                   |                    |
| A | A | C | A | T | G | G | T | A | A | T | G | T | C | C | C | - | - | - | - | -        | - | - | - | A        | <b>T</b> | G        | T        | T | C | T | G | T | C | C | C | A | C | C | C | 0.28% (636 reads)     |                   |                    |
| A | A | C | A | T | G | G | T | A | A | T | G | T | C | C | C | T | C | C | T | <b>G</b> | - | - | - | -        | -        | -        | -        | - | - | T | C | T | G | T | C | C | C | A | C | C                     | C                 | 0.28% (628 reads)  |
| A | A | C | A | T | G | G | T | A | A | T | G | T | C | C | C | T | C | C | T | -        | - | - | - | -        | -        | G        | T        | T | C | T | G | T | C | C | C | A | C | C | C | 0.27% (611 reads)     |                   |                    |
| A | A | C | A | T | G | G | T | A | A | T | G | T | C | C | C | T | C | C | T | <b>G</b> | - | - | - | -        | -        | -        | -        | T | T | C | T | G | T | C | C | C | A | C | C | C                     | 0.25% (566 reads) |                    |
| - | - | - | - | - | - | - | - | - | - | - | - | - | - | - | - | - | - | - | - | -        | - | - | - | -        | -        | -        | -        | - | - | - | - | - | - | - | - | - | - | - | - | -                     | -                 | 0.24% (546 reads)  |

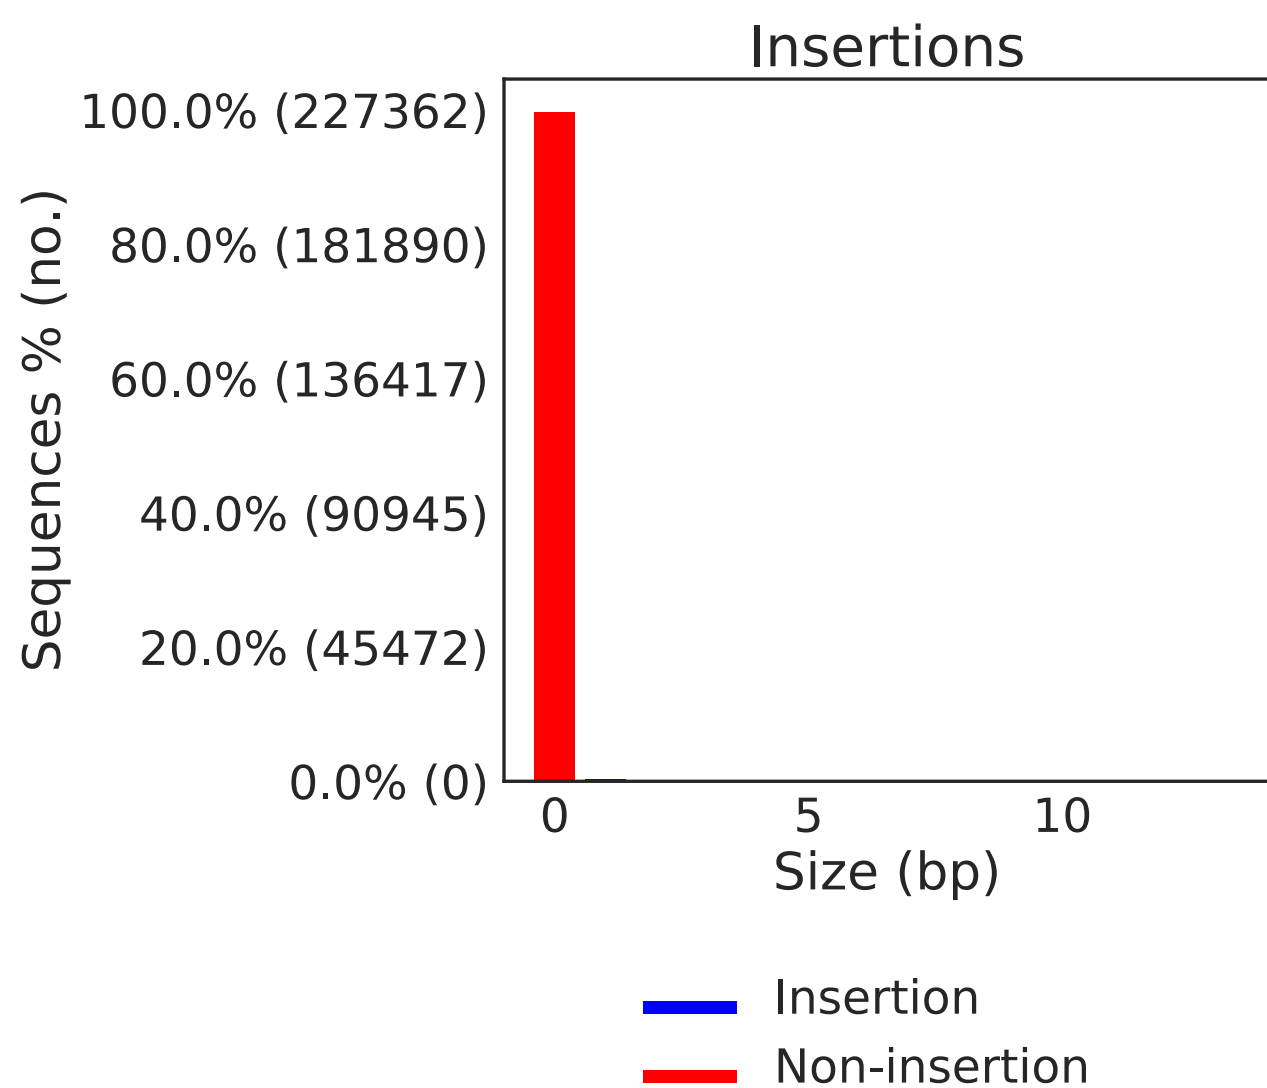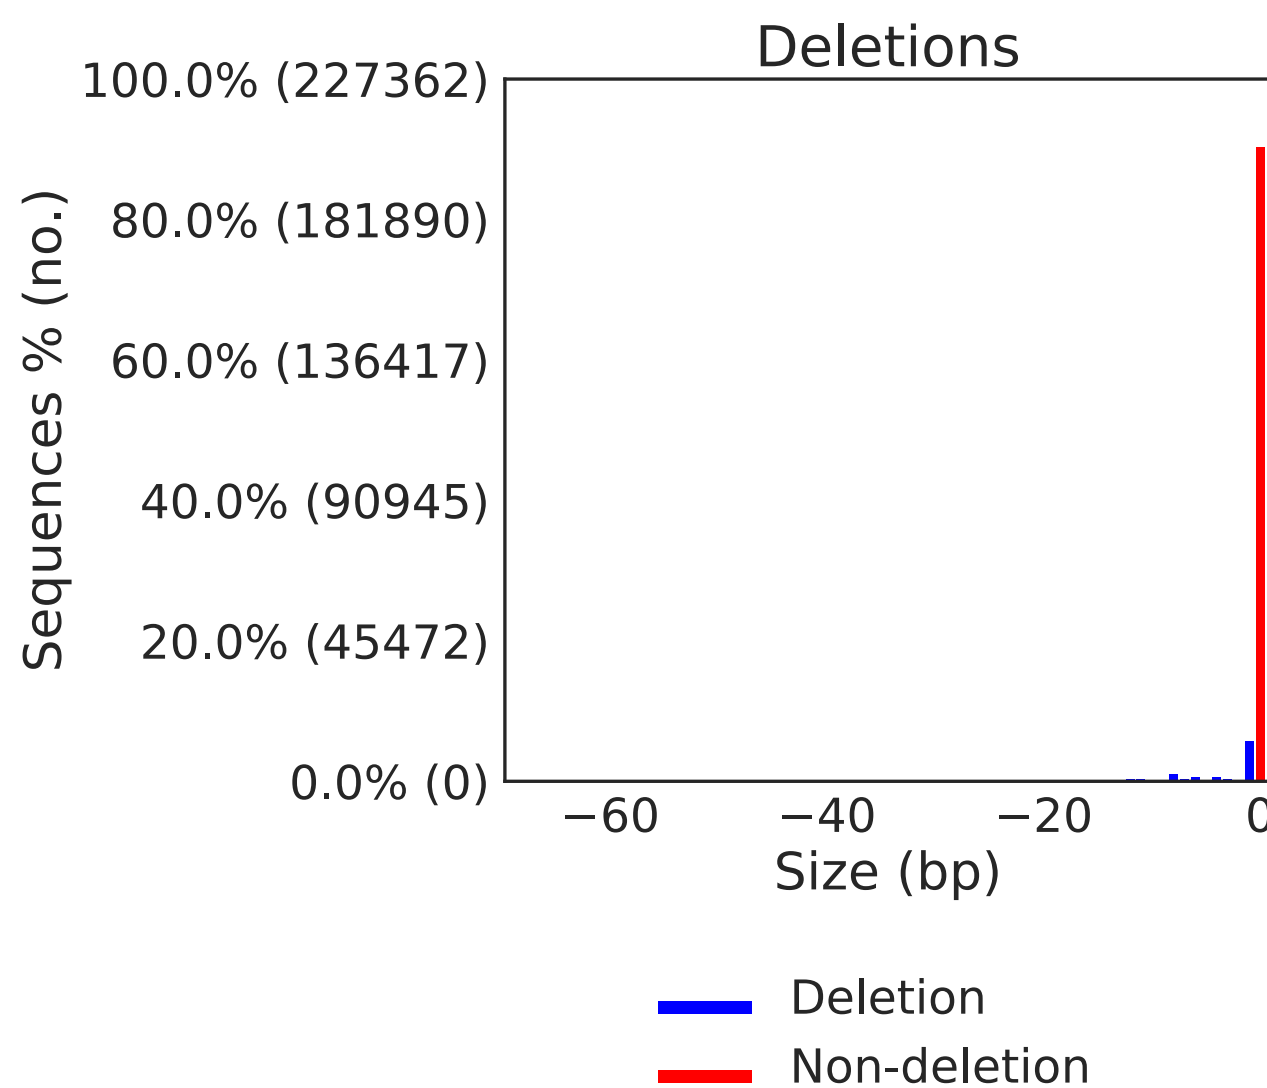

# Tmc1<sup>WT/WT</sup>, SpCas9 + gRNA WT

**bold** Substitutions  
 Insertions  
 - Deletions  
 - - - Predicted cleavage position

| A T G G T A A T G T C C C T C C T G G G G A T G T T C T G T C C C A C C C T G T |   |   |   |   |   |   |   |   |   |   |   |          |          |   |   |   |   |   |          |          |          |          |   |   | Reference |   |   |   |   |   |   |   |   |   |   |   |   |   |                     |                      |                   |                    |
|---------------------------------------------------------------------------------|---|---|---|---|---|---|---|---|---|---|---|----------|----------|---|---|---|---|---|----------|----------|----------|----------|---|---|-----------|---|---|---|---|---|---|---|---|---|---|---|---|---|---------------------|----------------------|-------------------|--------------------|
| A                                                                               | T | G | G | T | A | A | T | G | T | C | C | C        | T        | C | C | T | G | G | G        | <b>G</b> | A        | T        | G | T | T         | C | T | G | T | C | C | C | A | C | C | C | T | G | T                   | 35.76% (63934 reads) |                   |                    |
| A                                                                               | T | G | G | T | A | A | T | G | T | C | C | C        | T        | C | C | T | - | G | G        | G        | A        | T        | G | T | T         | C | T | G | T | C | C | C | A | C | C | C | T | G | T                   | 12.72% (22743 reads) |                   |                    |
| A                                                                               | T | G | G | T | A | A | T | G | T | C | C | C        | T        | C | C | T | G | G | G        | -        | A        | T        | G | T | T         | C | T | G | T | C | C | C | A | C | C | C | T | G | T                   | 11.05% (19766 reads) |                   |                    |
| A                                                                               | T | G | G | T | A | A | T | G | T | C | C | C        | T        | C | C | T | G | G | G        | <b>A</b> | <b>A</b> | G        | T | T | C         | T | G | T | C | C | C | A | C | C | C | T | G | T | 9.37% (16761 reads) |                      |                   |                    |
| A                                                                               | T | G | G | T | A | A | T | G | T | C | C | C        | T        | C | C | T | G | G | G        | -        | -        | T        | G | T | T         | C | T | G | T | C | C | C | A | C | C | C | T | G | T                   | 6.51% (11631 reads)  |                   |                    |
| A                                                                               | T | G | G | T | A | A | T | G | T | C | C | C        | T        | C | C | T | G | G | -        | -        | -        | G        | T | T | C         | T | G | T | C | C | C | A | C | C | C | T | G | T | 2.18% (3904 reads)  |                      |                   |                    |
| A                                                                               | T | G | G | T | A | A | T | G | T | C | C | C        | T        | C | C | T | G | G | G        | -        | -        | -        | T | T | C         | T | G | T | C | C | C | A | C | C | C | T | G | T | 1.95% (3480 reads)  |                      |                   |                    |
| A                                                                               | T | G | G | T | A | A | T | G | T | C | C | C        | T        | C | C | T | G | G | G        | -        | -        | -        | G | T | T         | C | T | G | T | C | C | C | A | C | C | C | T | G | T                   | 1.77% (3164 reads)   |                   |                    |
| A                                                                               | T | G | G | T | A | A | T | G | T | C | C | C        | T        | C | C | T | - | - | G        | G        | <b>A</b> | T        | G | T | T         | C | T | G | T | C | C | C | A | C | C | C | T | G | T                   | 1.56% (2792 reads)   |                   |                    |
| A                                                                               | T | G | G | T | A | A | T | G | T | C | C | C        | T        | C | C | T | G | G | G        | G        | -        | -        | - | T | T         | C | T | G | T | C | C | C | A | C | C | C | T | G | T                   | 1.55% (2766 reads)   |                   |                    |
| A                                                                               | T | G | G | T | A | A | T | G | T | C | C | C        | T        | C | C | T | G | G | G        | -        | -        | -        | - | - | -         | - | - | - | T | G | T | C | C | C | A | C | C | C | T                   | G                    | T                 | 1.55% (2763 reads) |
| A                                                                               | T | G | G | T | A | A | T | G | T | C | C | C        | T        | C | C | T | G | G | -        | -        | <b>A</b> | T        | G | T | T         | C | T | G | T | C | C | C | A | C | C | C | T | G | T                   | 1.38% (2459 reads)   |                   |                    |
| A                                                                               | T | G | G | T | A | A | T | G | T | C | C | C        | T        | C | C | T | G | G | G        | -        | -        | -        | - | - | -         | - | - | C | T | G | T | C | C | C | A | C | C | C | T                   | G                    | T                 | 1.21% (2160 reads) |
| A                                                                               | T | G | G | T | A | A | T | G | T | C | C | C        | T        | C | C | T | G | G | G        | -        | -        | -        | - | - | -         | - | T | C | T | G | T | C | C | C | A | C | C | C | T                   | G                    | T                 | 0.91% (1635 reads) |
| A                                                                               | T | G | G | T | A | A | T | G | T | C | C | C        | T        | C | C | T | G | G | G        | G        | -        | -        | - | - | -         | - | T | C | T | G | T | C | C | C | A | C | C | C | T                   | G                    | T                 | 0.48% (861 reads)  |
| A                                                                               | T | G | G | T | A | A | T | G | T | C | C | C        | T        | C | C | T | G | - | -        | -        | -        | -        | G | T | T         | C | T | G | T | C | C | C | A | C | C | C | T | G | T                   | 0.47% (832 reads)    |                   |                    |
| A                                                                               | T | G | G | T | A | A | T | G | T | C | C | C        | T        | C | - | - | - | - | -        | -        | <b>A</b> | T        | G | T | T         | C | T | G | T | C | C | C | A | C | C | C | T | G | T                   | 0.43% (761 reads)    |                   |                    |
| A                                                                               | T | G | G | T | A | - | - | - | - | - | - | -        | -        | - | - | - | - | - | -        | -        | <b>G</b> | <b>A</b> | T | G | T         | T | C | T | G | T | C | C | C | A | C | C | C | T | G                   | T                    | 0.42% (748 reads) |                    |
| A                                                                               | T | G | G | T | A | A | T | G | T | C | C | C        | T        | C | C | T | G | G | -        | -        | -        | -        | - | - | -         | T | T | C | T | G | T | C | C | C | A | C | C | C | T                   | G                    | T                 | 0.41% (741 reads)  |
| A                                                                               | T | G | G | T | A | A | T | G | T | C | C | C        | <b>C</b> | C | - | - | - | - | -        | -        | -        | -        | - | - | -         | T | T | C | T | G | T | C | C | C | A | C | C | C | T                   | G                    | T                 | 0.41% (741 reads)  |
| A                                                                               | T | G | G | T | A | A | T | G | T | C | C | C        | T        | C | - | - | - | - | -        | -        | -        | -        | G | T | T         | C | T | G | T | C | C | C | A | C | C | C | T | G | T                   | 0.41% (738 reads)    |                   |                    |
| A                                                                               | T | G | G | T | A | A | T | G | T | C | C | C        | T        | C | C | T | G | G | G        | -        | -        | -        | - | - | -         | - | - | - | - | - | - | - | - | - | - | - | - | - | -                   | -                    | 0.41% (725 reads) |                    |
| A                                                                               | T | G | G | T | A | A | T | G | T | C | C | C        | T        | C | C | T | G | - | -        | -        | -        | -        | - | - | -         | - | T | C | T | G | T | C | C | C | A | C | C | C | T                   | G                    | T                 | 0.39% (703 reads)  |
| A                                                                               | T | G | G | T | A | A | T | G | T | C | C | C        | T        | C | C | T | G | - | -        | -        | -        | -        | - | - | -         | - | - | C | T | G | T | C | C | C | A | C | C | C | T                   | G                    | T                 | 0.37% (662 reads)  |
| A                                                                               | T | G | G | T | A | A | T | G | T | C | C | C        | T        | - | - | - | - | - | -        | -        | -        | -        | - | - | -         | T | T | C | T | G | T | C | C | C | A | C | C | C | T                   | G                    | T                 | 0.34% (614 reads)  |
| A                                                                               | T | G | G | T | A | A | T | G | T | C | C | <b>A</b> | T        | C | C | T | G | G | G        | G        | <b>A</b> | <b>A</b> | G | T | T         | C | T | G | T | C | C | C | A | C | C | C | T | G | T                   | 0.24% (435 reads)    |                   |                    |
| A                                                                               | T | G | G | T | A | A | T | G | T | C | C | C        | T        | C | C | T | - | - | -        | G        | <b>A</b> | T        | G | T | T         | C | T | G | T | C | C | C | A | C | C | C | T | G | T                   | 0.24% (432 reads)    |                   |                    |
| A                                                                               | T | G | G | T | A | A | T | G | T | C | C | C        | T        | C | C | T | G | - | -        | -        | <b>A</b> | T        | G | T | T         | C | T | G | T | C | C | C | A | C | C | C | T | G | T                   | 0.23% (419 reads)    |                   |                    |
| A                                                                               | T | G | G | T | A | A | T | G | T | C | C | C        | T        | C | C | - | - | - | -        | -        | -        | -        | T | G | T         | T | C | T | G | T | C | C | C | A | C | C | C | T | G                   | T                    | 0.22% (389 reads) |                    |
| A                                                                               | T | G | G | T | A | A | T | G | T | C | C | C        | T        | C | C | - | - | - | -        | G        | <b>G</b> | T        | G | T | T         | C | T | G | T | C | C | C | A | C | C | C | T | G | T                   | 0.21% (382 reads)    |                   |                    |
| A                                                                               | T | G | G | T | A | A | T | G | T | C | C | C        | T        | C | C | T | G | G | -        | -        | -        | -        | - | - | -         | - | - | G | T | C | C | C | A | C | C | C | T | G | T                   | 0.21% (373 reads)    |                   |                    |
| A                                                                               | T | G | G | T | A | A | T | G | T | C | C | C        | T        | C | C | - | - | - | <b>C</b> | G        | <b>A</b> | T        | G | T | T         | C | T | G | T | C | C | C | A | C | C | C | T | G | T                   | 0.21% (373 reads)    |                   |                    |

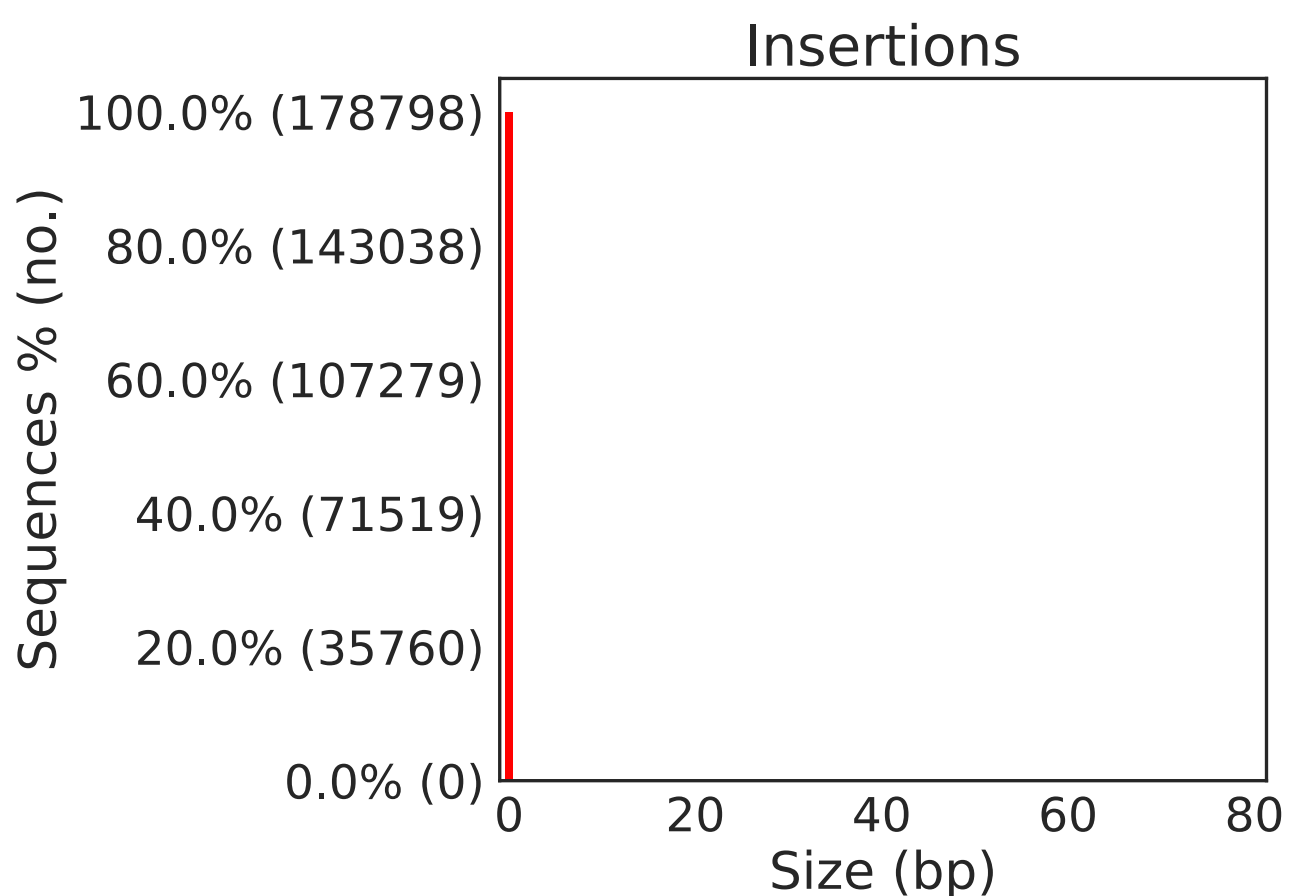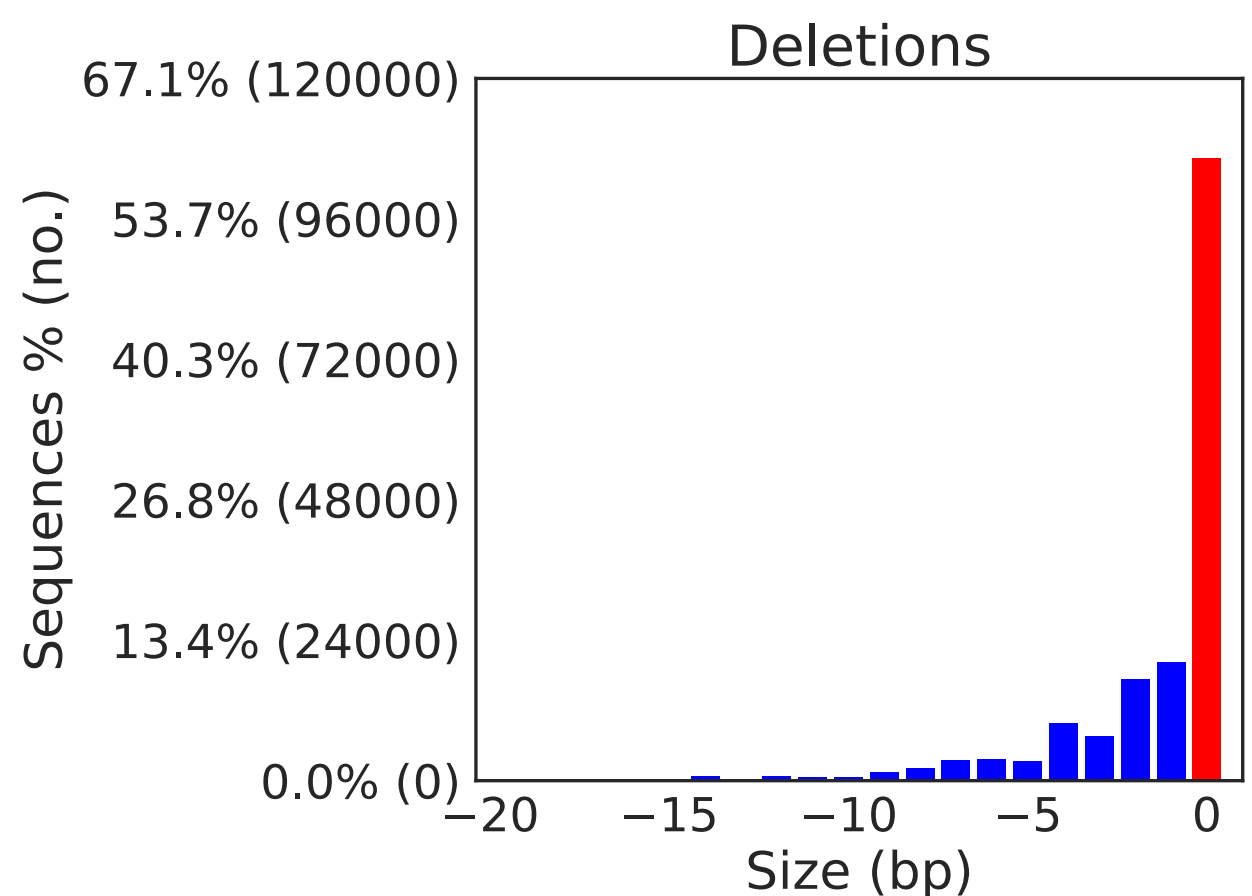

Insertion  
 Non-insertion

Deletion  
 Non-deletion



# *Tmc<sup>Bth/WT</sup>*, SpCas9 only, Bth allele

**bold** Substitutions  
 Insertions  
 - Deletions  
 - - - Predicted cleavage position

A T G G T A A T G T C C C T C C T G G G G A A G T T C T G T C C C A C C C T G T Reference  
 A T G G T A A T G T C C C T C C T G G G **G** A A G T T C T G T C C C A C C C T G T 98.27% (23918 reads)

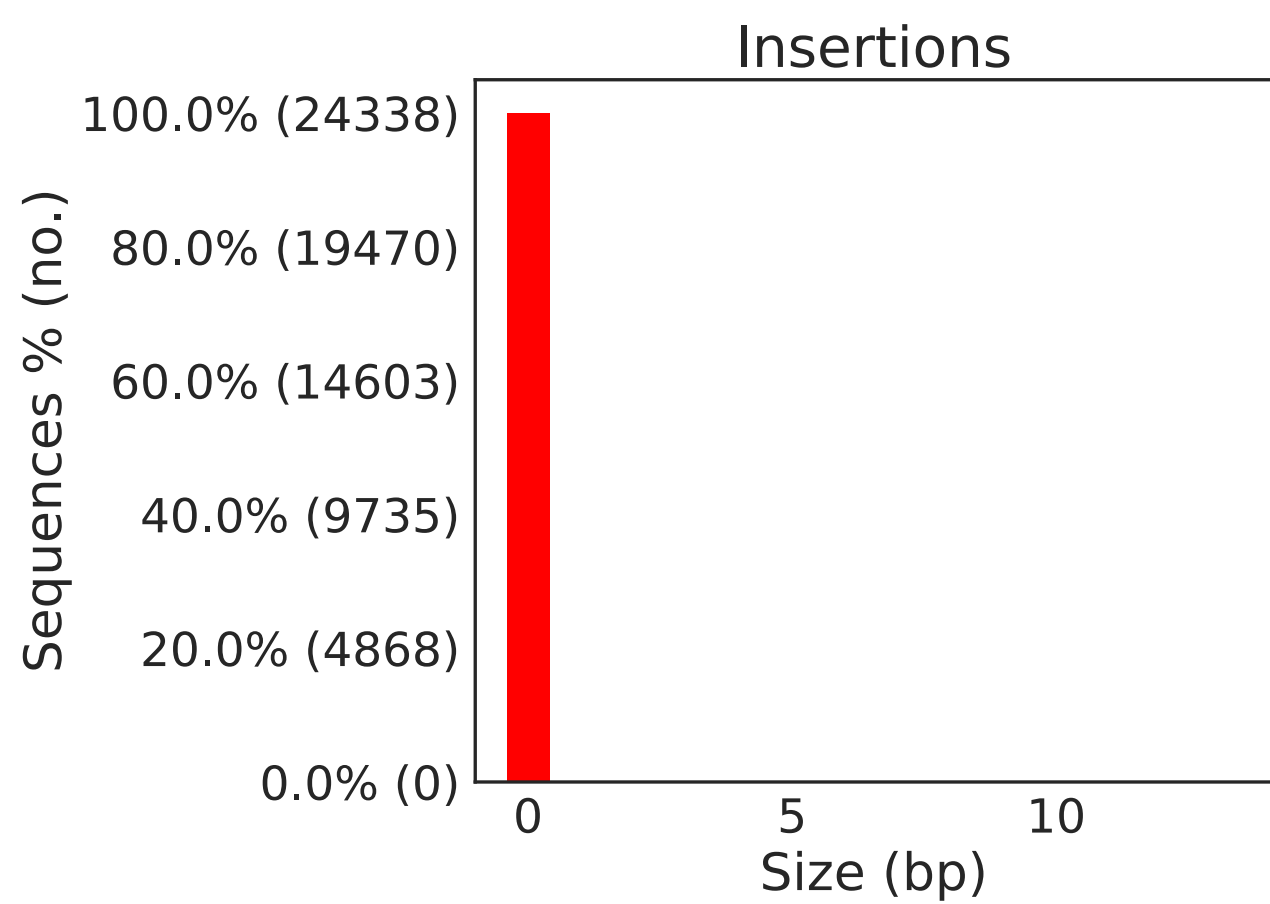

— Insertion  
— Non-insertion

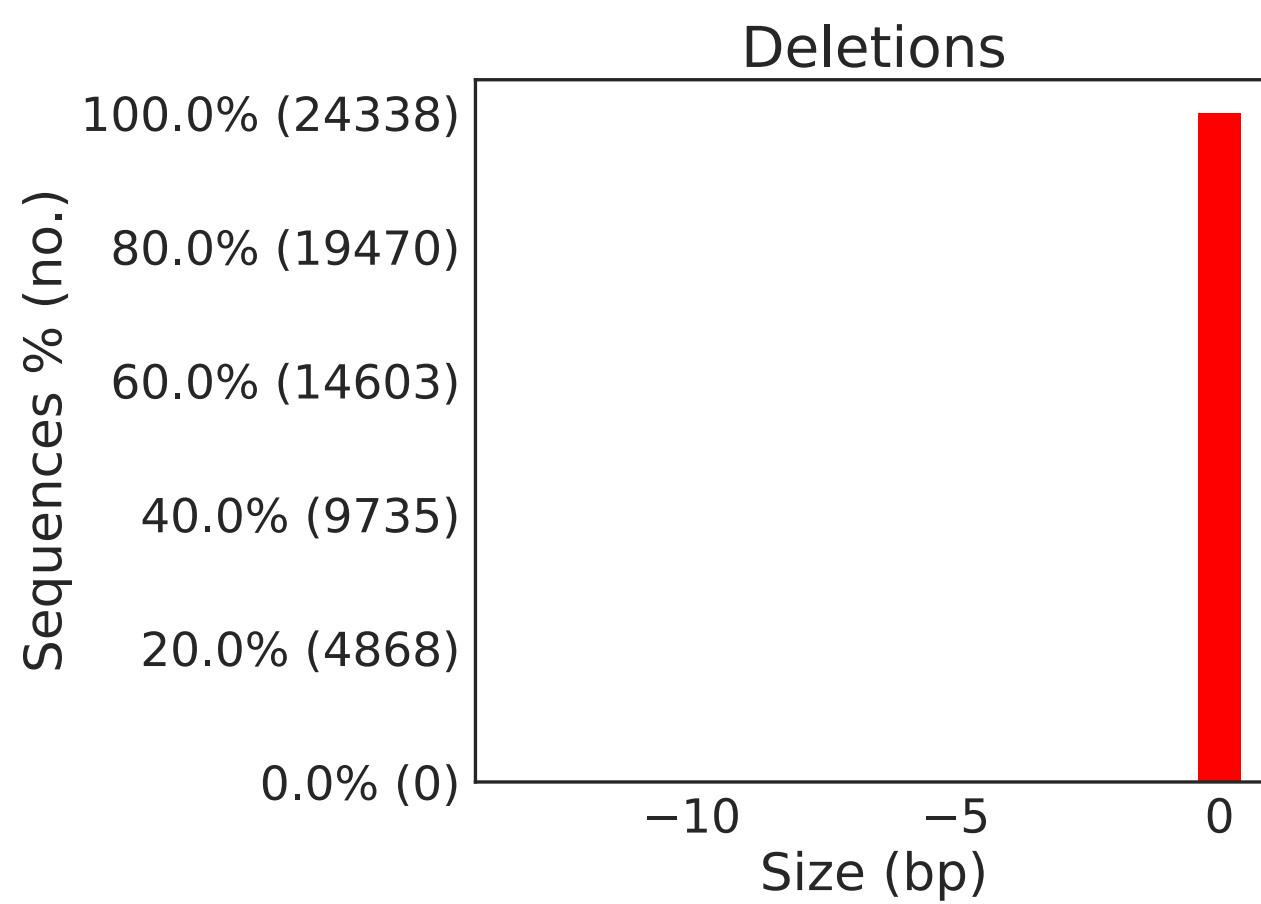

— Deletion  
— Non-deletion

# *Tmc<sup>Bth/WT</sup>*, SpCas9 only, WT allele

**bold** Substitutions  
  Insertions  
 - Deletions  
 - - - Predicted cleavage position

A T G G T A A T G T C C C T C C T G G G G A A G T T C T G T C C C A C C C T G T Reference  
 A T G G T A A T G T C C C T C C T G G G **G** A **T** G T T C T G T C C C A C C C T G T 98.25% (23391 reads)

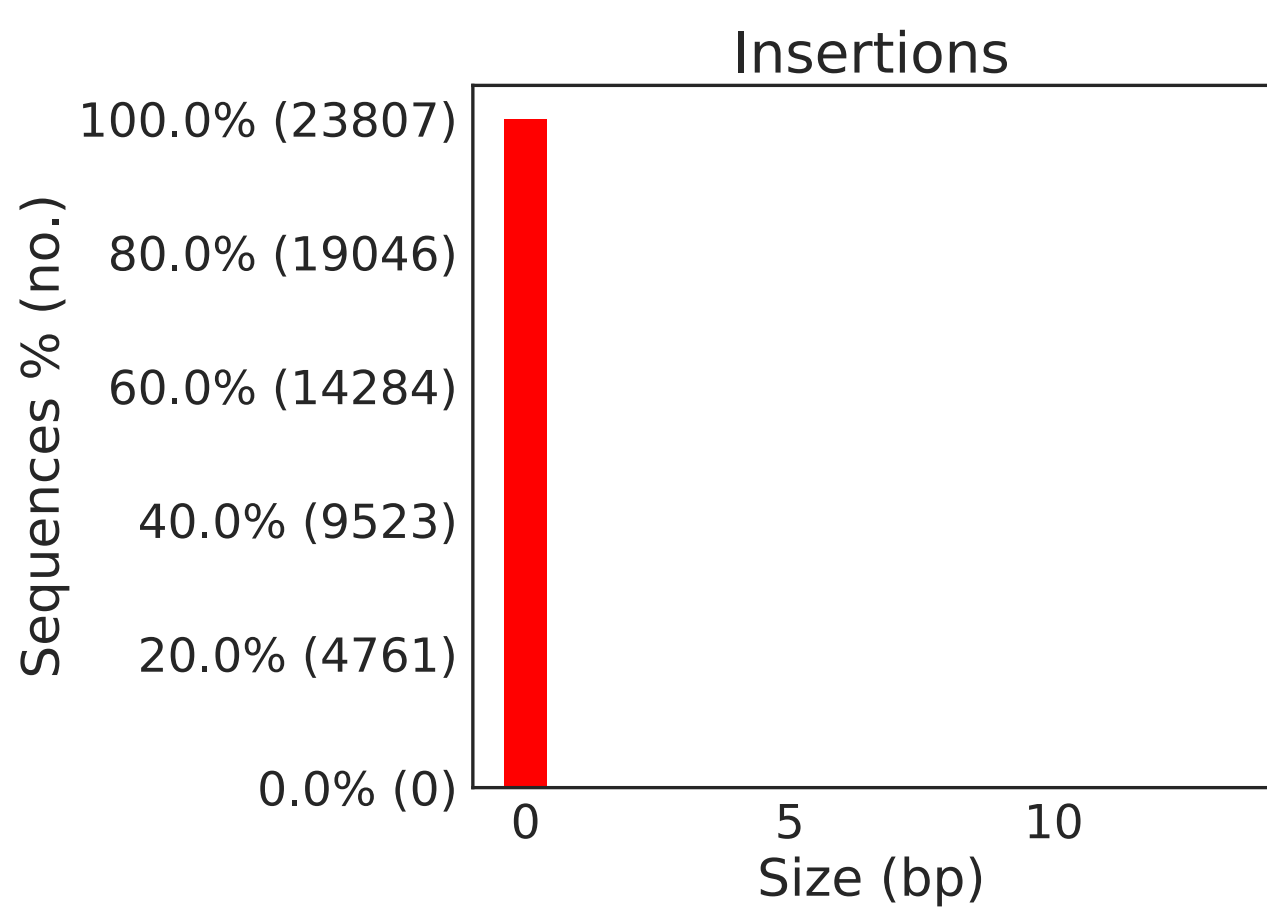

— Insertion  
— Non-insertion

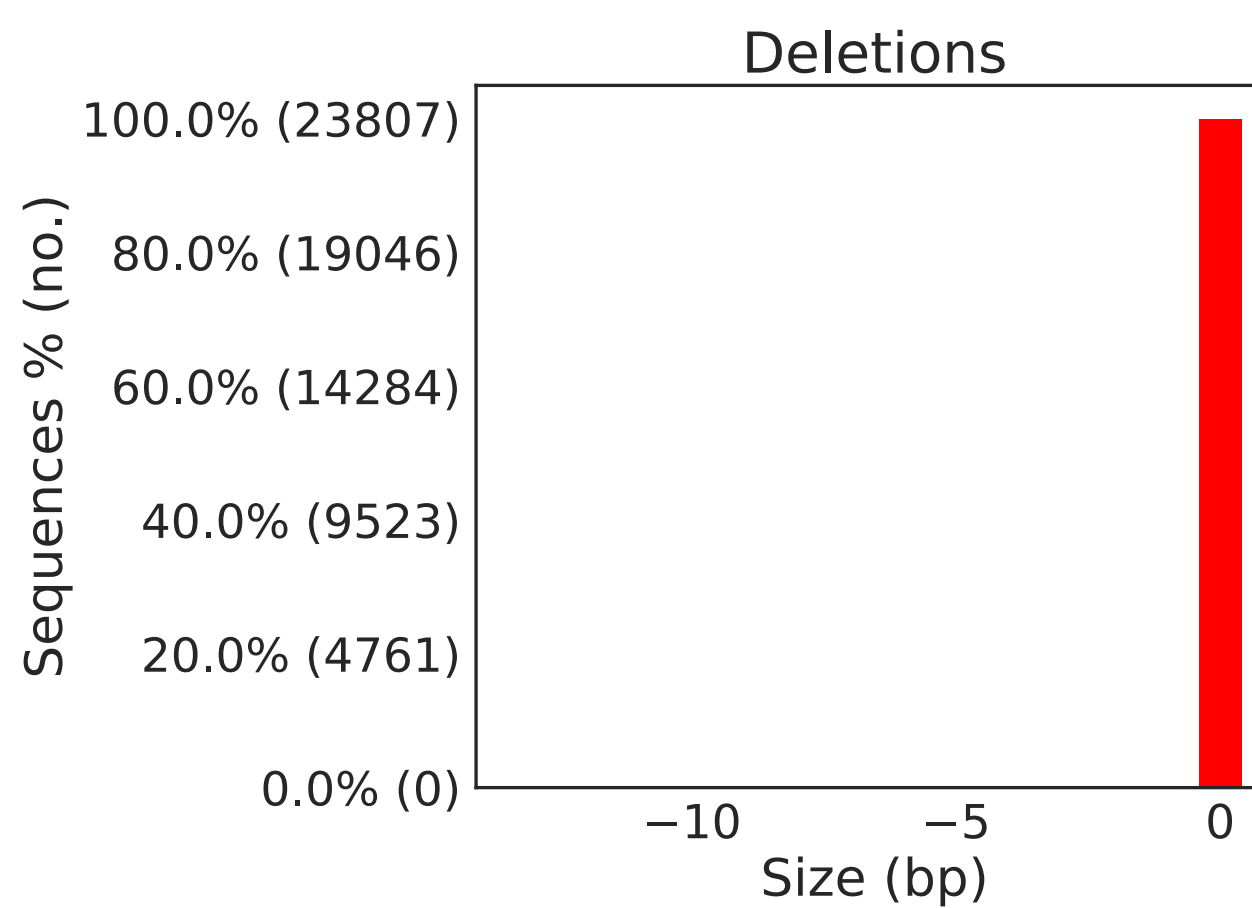

— Deletion  
— Non-deletion

# *Tmc<sup>Bth/WT</sup>*, SpCas9 + gRNA 1.1, Bth allele

**bold** Substitutions  
 Insertions  
 - Deletions  
 - - - Predicted cleavage position

|   |   |   |   |   |   |   |   |   |   |   |   |   |   |   |   |   |   |   |   |          |   |   |   |   |   |   |   |   |   |   |   |   |   |   |   |   |   |   |   |                      |                   |
|---|---|---|---|---|---|---|---|---|---|---|---|---|---|---|---|---|---|---|---|----------|---|---|---|---|---|---|---|---|---|---|---|---|---|---|---|---|---|---|---|----------------------|-------------------|
| A | T | G | G | T | A | A | T | G | T | C | C | C | T | C | C | T | G | G | G | G        | A | A | G | T | T | C | T | G | T | C | C | C | A | C | C | C | T | G | T | Reference            |                   |
| A | T | G | G | T | A | A | T | G | T | C | C | C | T | C | C | T | G | G | G | <b>G</b> | A | A | G | T | T | C | T | G | T | C | C | C | A | C | C | C | T | G | T | 81.34% (17909 reads) |                   |
| A | T | G | G | T | A | A | T | G | T | C | C | C | T | C | C | T | G | G | G | -        | A | A | G | T | T | C | T | G | T | C | C | C | A | C | C | C | T | G | T | 5.10% (1122 reads)   |                   |
| A | T | G | G | T | A | A | T | G | T | C | C | C | T | C | C | T | - | G | G | G        | A | A | G | T | T | C | T | G | T | C | C | C | A | C | C | C | T | G | T | 4.91% (1082 reads)   |                   |
| A | T | G | G | T | A | A | T | G | T | C | C | C | T | C | C | T | G | G | G | -        | - | A | A | G | T | T | C | T | G | T | C | C | C | A | C | C | C | T | G | T                    | 2.77% (610 reads) |
| A | T | G | G | T | A | A | T | G | T | C | C | C | T | C | C | T | G | G | - | -        | A | A | G | T | T | C | T | G | T | C | C | C | A | C | C | C | T | G | T | 0.41% (91 reads)     |                   |
| A | T | G | G | T | A | A | T | G | T | C | C | C | T | C | C | T | - | - | G | G        | A | A | G | T | T | C | T | G | T | C | C | C | A | C | C | C | T | G | T | 0.41% (90 reads)     |                   |
| A | T | G | G | T | A | A | T | G | T | C | C | C | T | C | - | - | - | - | - | G        | A | A | G | T | T | C | T | G | T | C | C | C | A | C | C | C | T | G | T | 0.20% (45 reads)     |                   |

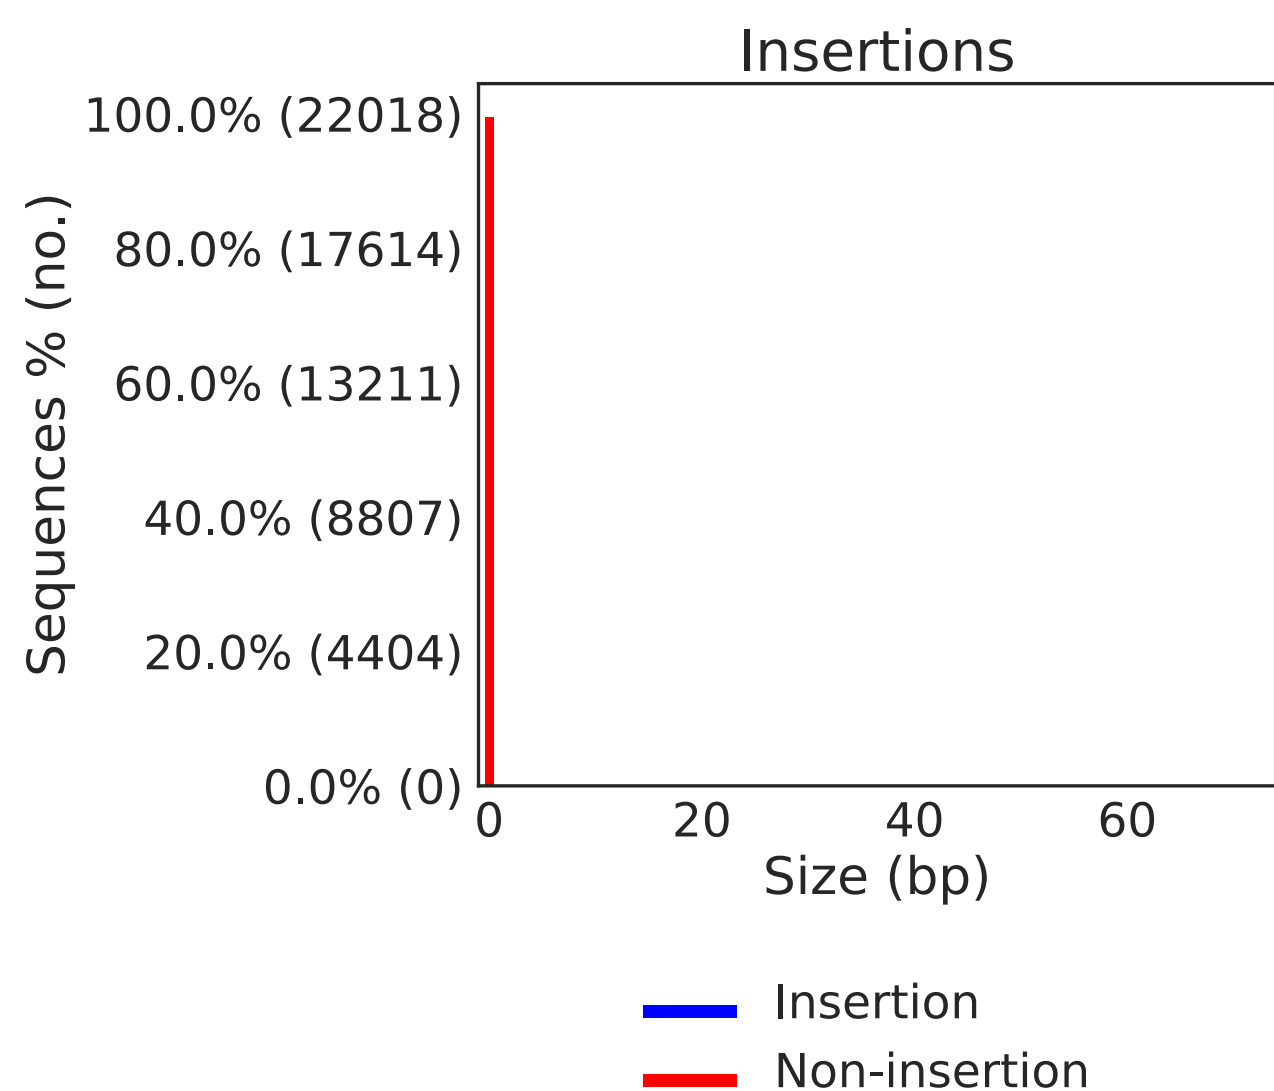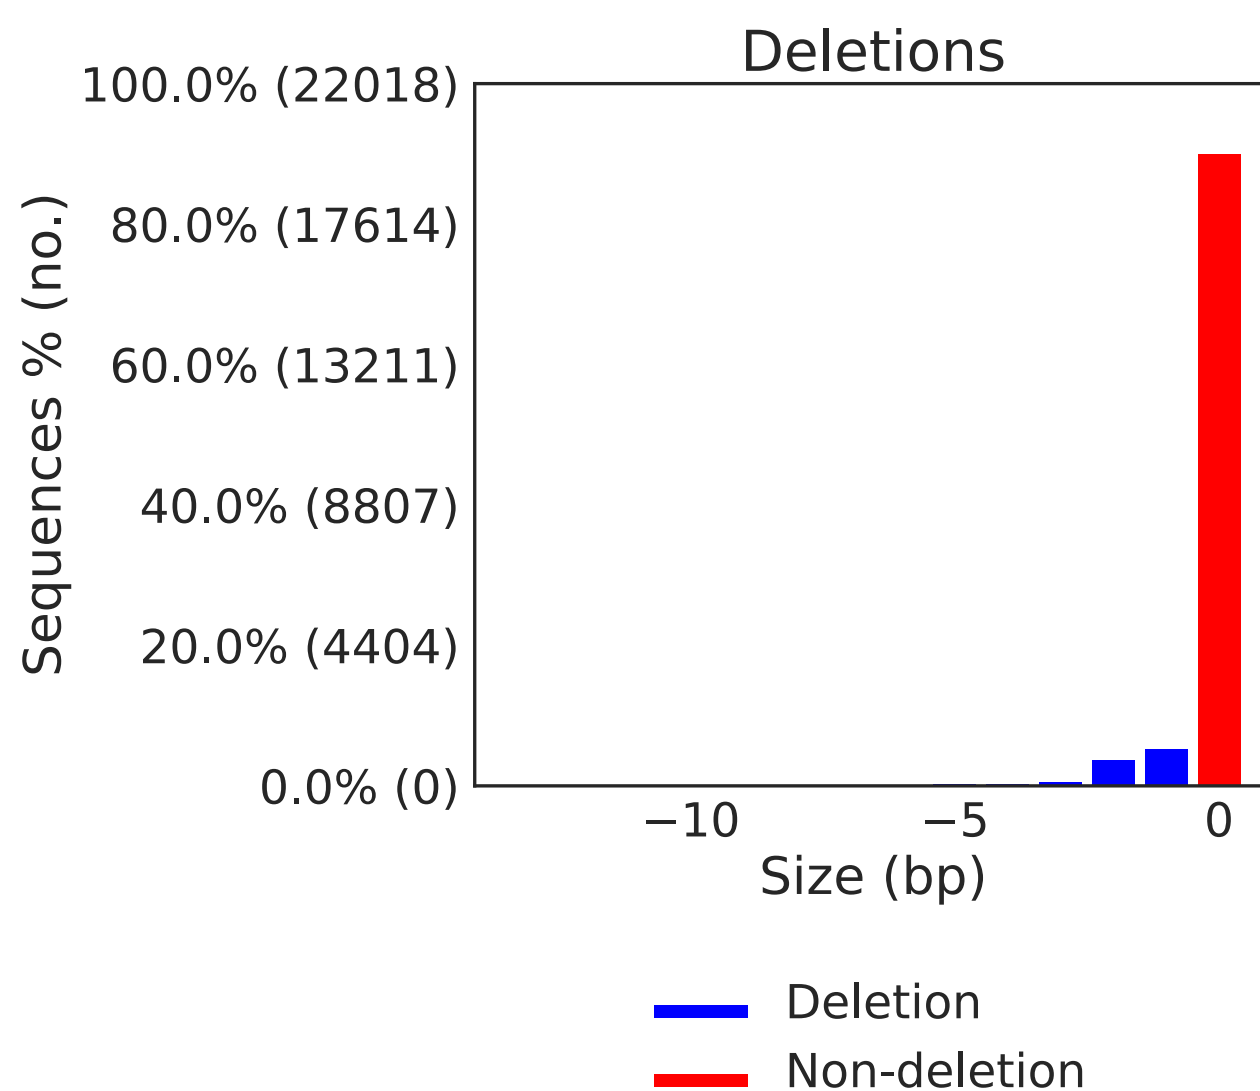

# *Tmc*<sup>Bth/WT</sup>, SpCas9 + gRNA 1.1, WT allele

**bold** Substitutions  
 Insertions  
 - Deletions  
 - - - Predicted cleavage position

|   |   |   |   |   |   |   |   |   |   |   |   |   |   |   |   |   |   |   |   |          |   |          |   |   |   |   |   |   |   |   |   |   |   |   |   |   |   |   |   |                      |
|---|---|---|---|---|---|---|---|---|---|---|---|---|---|---|---|---|---|---|---|----------|---|----------|---|---|---|---|---|---|---|---|---|---|---|---|---|---|---|---|---|----------------------|
| A | T | G | G | T | A | A | T | G | T | C | C | C | T | C | C | T | G | G | G | G        | A | A        | G | T | T | C | T | G | T | C | C | C | A | C | C | C | T | G | T | Reference            |
| A | T | G | G | T | A | A | T | G | T | C | C | C | T | C | C | T | G | G | G | <b>G</b> | A | <b>T</b> | G | T | T | C | T | G | T | C | C | C | A | C | C | C | T | G | T | 92.48% (25403 reads) |
| A | T | G | G | T | A | A | T | G | T | C | C | C | T | C | C | T | - | G | G | <b>G</b> | A | <b>T</b> | G | T | T | C | T | G | T | C | C | C | A | C | C | C | T | G | T | 1.56% (429 reads)    |
| A | T | G | G | T | A | A | T | G | T | C | C | C | T | C | C | T | G | G | G | -        | A | <b>T</b> | G | T | T | C | T | G | T | C | C | C | A | C | C | C | T | G | T | 1.46% (402 reads)    |
| A | T | G | G | T | A | A | T | G | T | C | C | C | T | C | C | T | G | G | G | <b>T</b> | - | -        | G | T | T | C | T | G | T | C | C | C | A | C | C | C | T | G | T | 0.40% (111 reads)    |
| A | T | G | G | T | A | A | T | G | T | C | C | C | T | C | C | T | G | G | G | -        | - | <b>T</b> | G | T | T | C | T | G | T | C | C | C | A | C | C | C | T | G | T | 0.39% (108 reads)    |

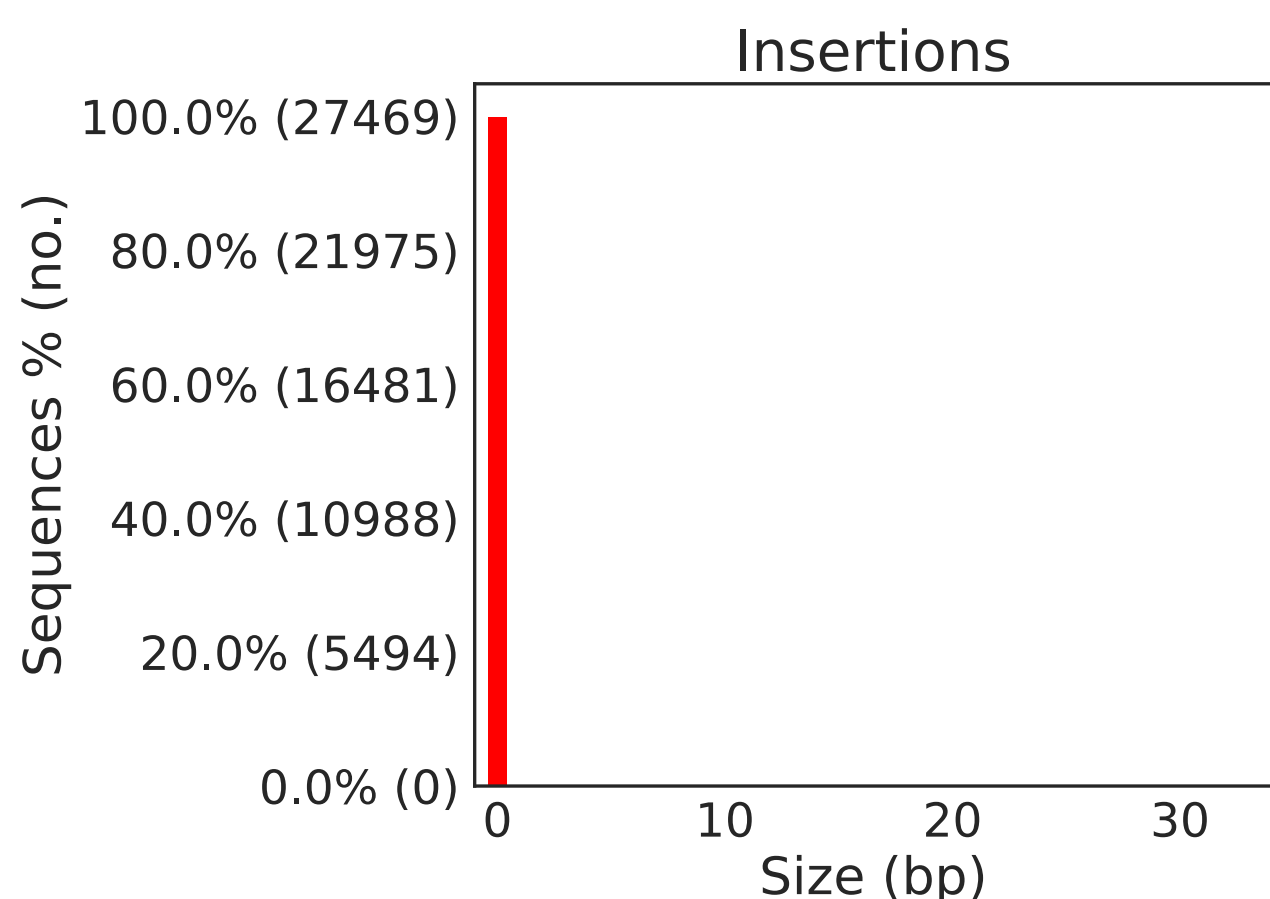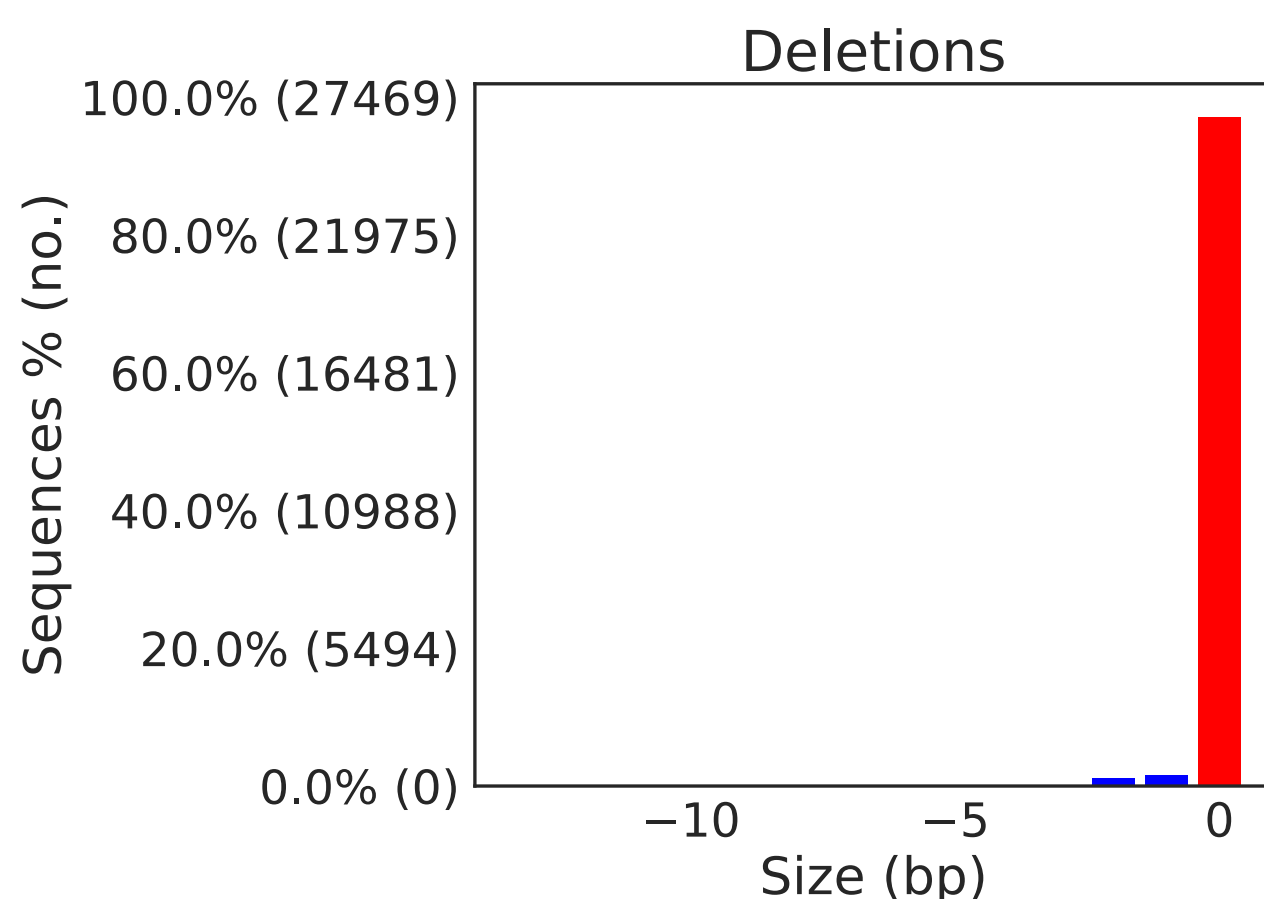

█ Insertion  
█ Non-insertion

█ Deletion  
█ Non-deletion



# *Tmc*<sup>Bth/WT</sup>, SpCas9 + gRNA 2.1, Bth allele

**bold** Substitutions  
 Insertions  
 - Deletions  
 - - - Predicted cleavage position

|   |   |   |   |   |   |   |   |   |   |   |   |   |   |   |   |   |   |   |   |   |   |   |   |   |   |   |   |   |   |   |   |   |   |   |   |   |   |   |   |                      |
|---|---|---|---|---|---|---|---|---|---|---|---|---|---|---|---|---|---|---|---|---|---|---|---|---|---|---|---|---|---|---|---|---|---|---|---|---|---|---|---|----------------------|
| A | A | C | A | T | G | G | T | A | A | T | G | T | C | C | C | T | C | C | T | G | G | G | G | A | A | G | T | T | C | T | G | T | C | C | C | A | C | C | C | Reference            |
| A | A | C | A | T | G | G | T | A | A | T | G | T | C | C | C | T | C | C | T | G | G | G | G | A | A | G | T | T | C | T | G | T | C | C | C | A | C | C | C | 90.87% (15166 reads) |
| A | A | C | A | T | G | G | T | A | A | T | G | T | C | C | C | T | C | C | T | G | G | G | G | A | A | G | T | T | C | T | G | T | C | C | C | A | C | C | C | 1.52% (254 reads)    |
| A | A | C | A | T | G | G | T | A | A | T | G | T | C | C | C | T | C | C | T | G | G | G | G | A | A | G | T | T | C | T | G | T | C | C | C | A | C | C | C | 1.04% (173 reads)    |
| A | A | C | A | T | G | G | T | A | A | T | G | T | C | C | C | T | C | C | T | G | G | G | G | A | A | G | T | T | C | T | G | T | C | C | C | A | C | C | C | 1.01% (168 reads)    |

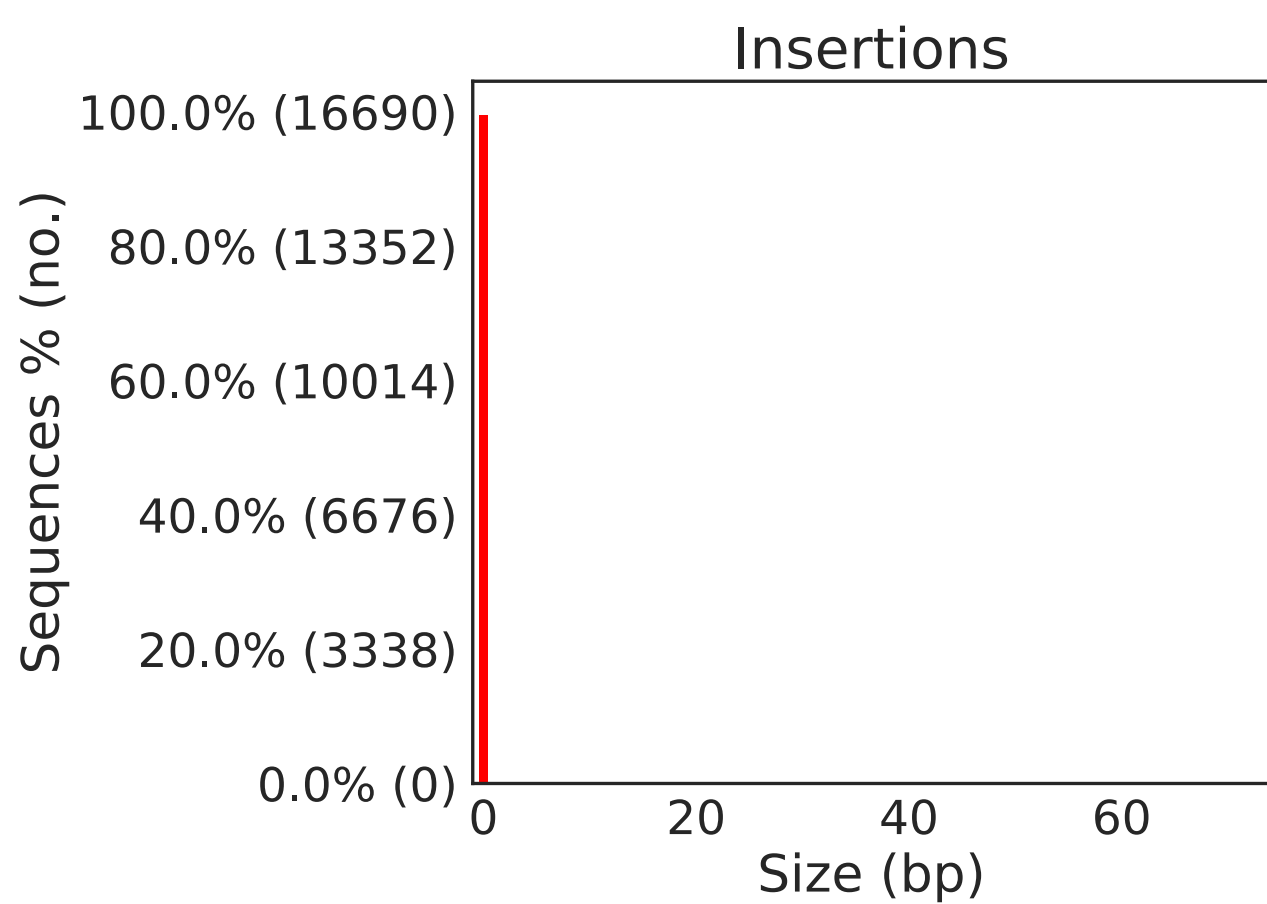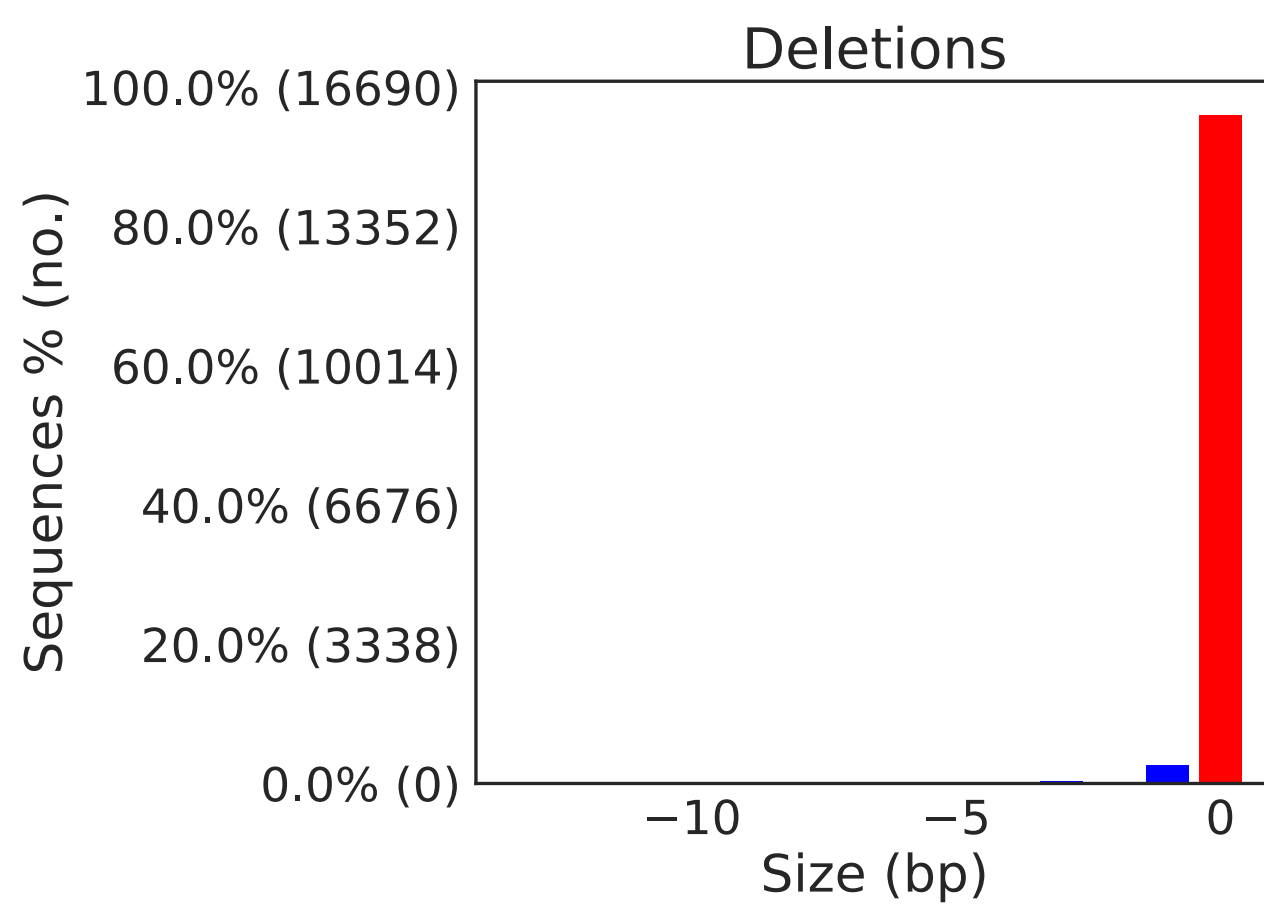

— Insertion  
— Non-insertion

— Deletion  
— Non-deletion

# *Tmc*<sup>Bth/WT</sup>, SpCas9 + gRNA 2.1, WT allele

**bold** Substitutions  
  Insertions  
 - Deletions  
 - - - Predicted cleavage position

|   |   |   |   |   |   |   |   |   |   |   |   |   |   |   |   |   |   |   |   |   |   |   |   |   |          |   |   |   |   |   |   |   |   |   |   |   |   |   |   |                      |
|---|---|---|---|---|---|---|---|---|---|---|---|---|---|---|---|---|---|---|---|---|---|---|---|---|----------|---|---|---|---|---|---|---|---|---|---|---|---|---|---|----------------------|
| A | A | C | A | T | G | G | T | A | A | T | G | T | C | C | C | T | C | C | T | G | G | G | G | A | A        | G | T | T | C | T | G | T | C | C | C | A | C | C | C | Reference            |
| A | A | C | A | T | G | G | T | A | A | T | G | T | C | C | C | T | C | C | T | G | G | G | G | A | <b>T</b> | G | T | T | C | T | G | T | C | C | C | A | C | C | C | 93.33% (19648 reads) |
| A | A | C | A | T | G | G | T | A | A | T | G | T | C | C | C | T | C | C | T | G | G | G | G | A | <b>T</b> | G | T | T | C | T | G | T | C | C | C | A | C | C | C | 0.75% (157 reads)    |
| A | A | C | A | T | G | G | T | A | A | T | G | T | C | C | C | T | C | C | T | G | G | G | G | A | <b>T</b> | G | T | T | C | T | G | T | C | C | C | A | C | C | C | 0.69% (145 reads)    |
| A | A | C | A | T | G | G | T | A | A | T | G | T | C | C | C | T | C | C | T | G | G | G | G | A | <b>T</b> | G | T | T | C | T | G | T | C | C | C | A | C | C | C | 0.64% (134 reads)    |

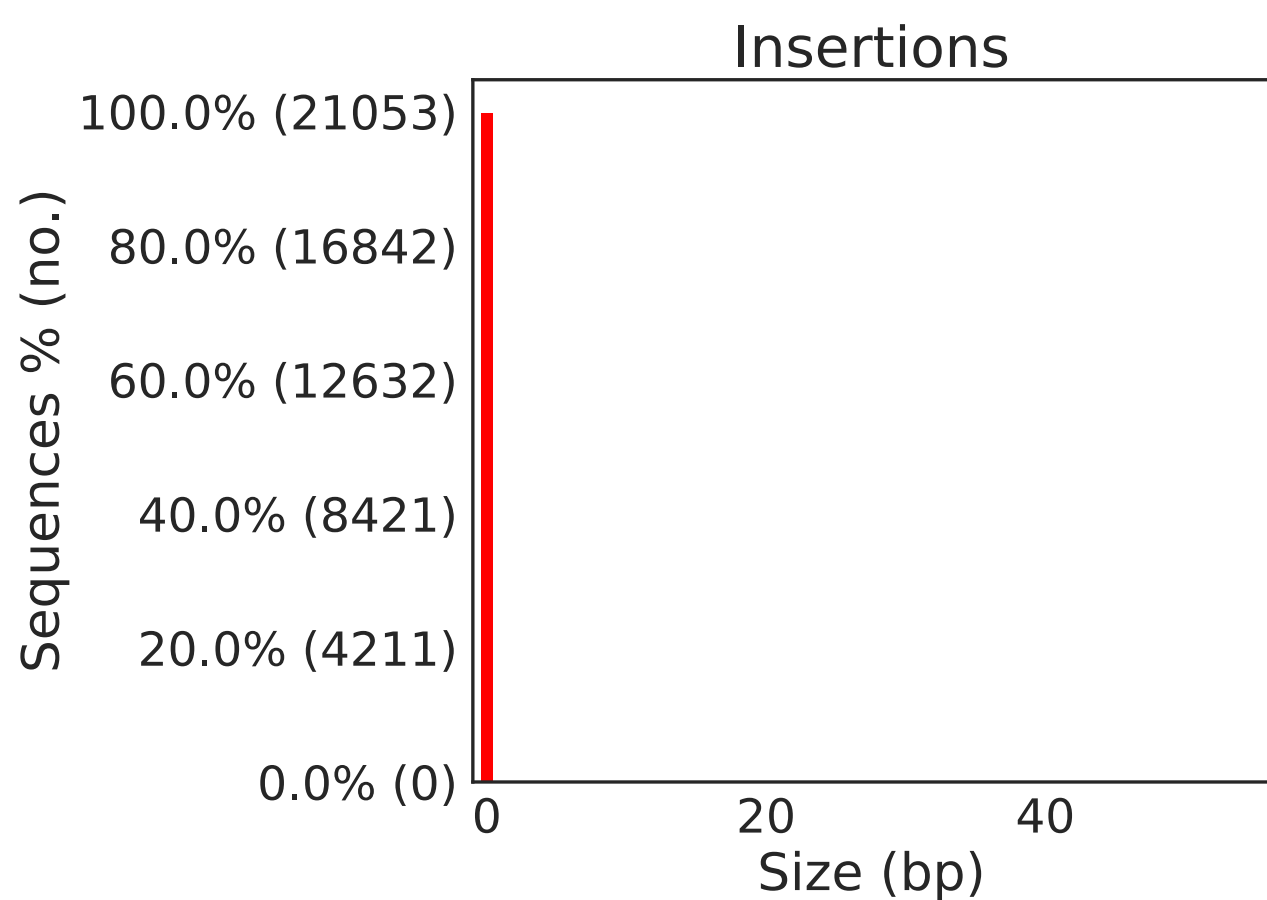

— Insertion  
 — Non-insertion

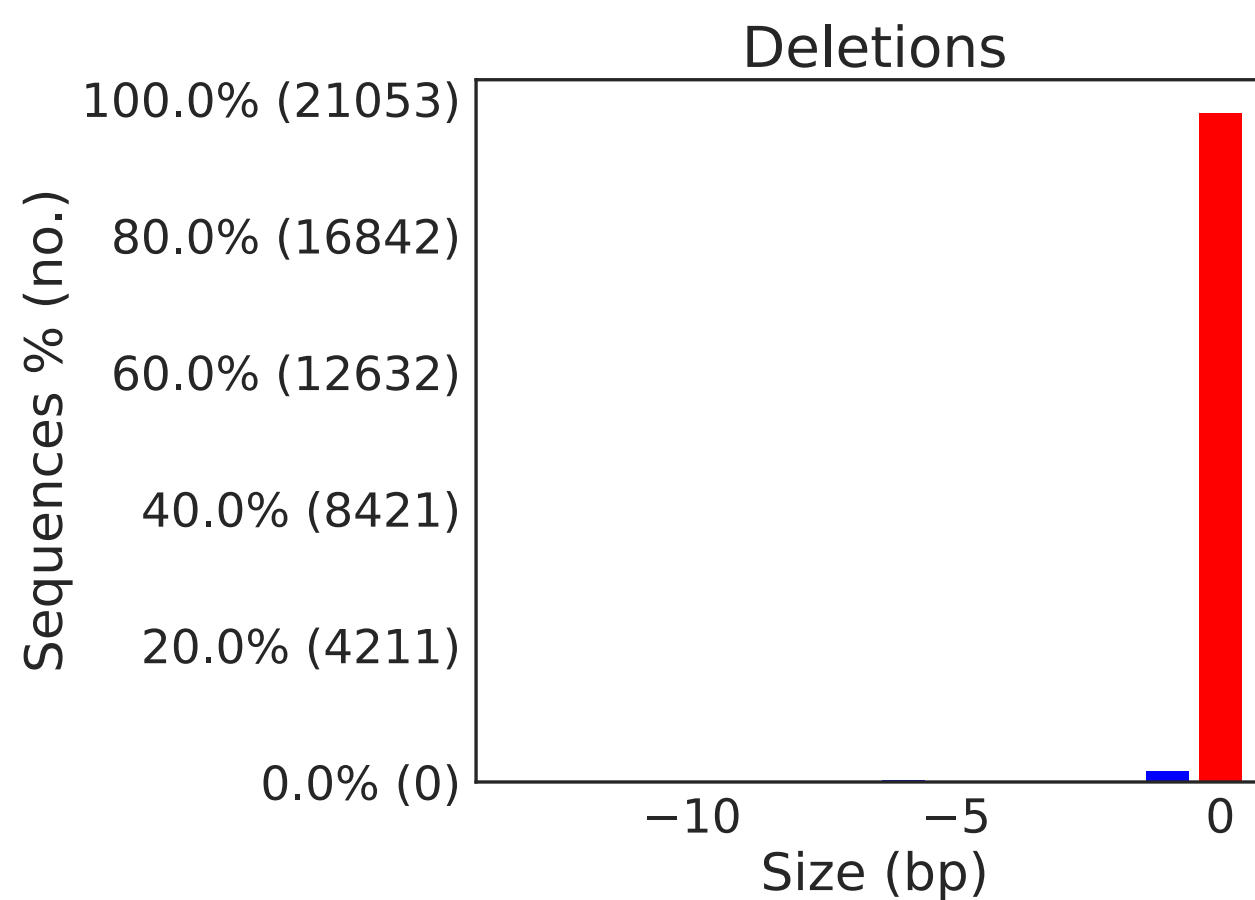

— Deletion  
 — Non-deletion

# *Tmc*<sup>Bth/WT</sup>, SpCas9 + gRNA 2.4, Bth allele

**bold** Substitutions  
  Insertions  
 - Deletions  
 - - - Predicted cleavage position

|   |   |   |   |   |   |   |   |   |   |   |   |   |   |   |   |   |   |   |   |          |   |   |   |          |   |   |   |   |   |   |   |   |   |   |   |   |   |   |   |                      |                  |
|---|---|---|---|---|---|---|---|---|---|---|---|---|---|---|---|---|---|---|---|----------|---|---|---|----------|---|---|---|---|---|---|---|---|---|---|---|---|---|---|---|----------------------|------------------|
| A | A | C | A | T | G | G | T | A | A | T | G | T | C | C | C | T | C | C | T | G        | G | G | G | A        | A | G | T | T | C | T | G | T | C | C | C | A | C | C | C | Reference            |                  |
| A | A | C | A | T | G | G | T | A | A | T | G | T | C | C | C | T | C | C | T | <b>G</b> | G | G | G | A        | A | G | T | T | C | T | G | T | C | C | C | A | C | C | C | 88.91% (20281 reads) |                  |
| A | A | C | A | T | G | G | T | A | A | T | G | T | C | C | C | T | C | C | - | G        | G | G | G | A        | A | G | T | T | C | T | G | T | C | C | C | A | C | C | C | 1.81% (413 reads)    |                  |
| A | A | C | A | T | G | G | T | A | A | T | G | T | C | C | C | T | C | C | T | <b>G</b> | G | G | - | A        | A | G | T | T | C | T | G | T | C | C | C | A | C | C | C | 1.65% (376 reads)    |                  |
| A | A | C | A | T | G | G | T | A | A | T | G | T | C | C | C | T | C | C | T | -        | G | G | G | A        | A | G | T | T | C | T | G | T | C | C | C | A | C | C | C | 1.62% (369 reads)    |                  |
| A | A | C | A | T | G | G | T | A | A | T | G | T | C | C | C | T | C | C | T | <b>G</b> | G | G | G | A        | A | G | T | T | C | T | G | T | C | C | C | A | C | C | C | 0.37% (85 reads)     |                  |
| A | A | C | A | T | G | G | T | A | A | T | G | T | C | C | C | T | C | C | T | <b>G</b> | G | G | G | <b>G</b> | A | A | G | T | T | C | T | G | T | C | C | C | A | C | C | C                    | 0.35% (79 reads) |
| A | A | C | A | T | G | G | T | A | A | T | G | T | C | C | C | T | C | - | - | G        | G | G | G | A        | A | G | T | T | C | T | G | T | C | C | C | A | C | C | C | 0.21% (47 reads)     |                  |

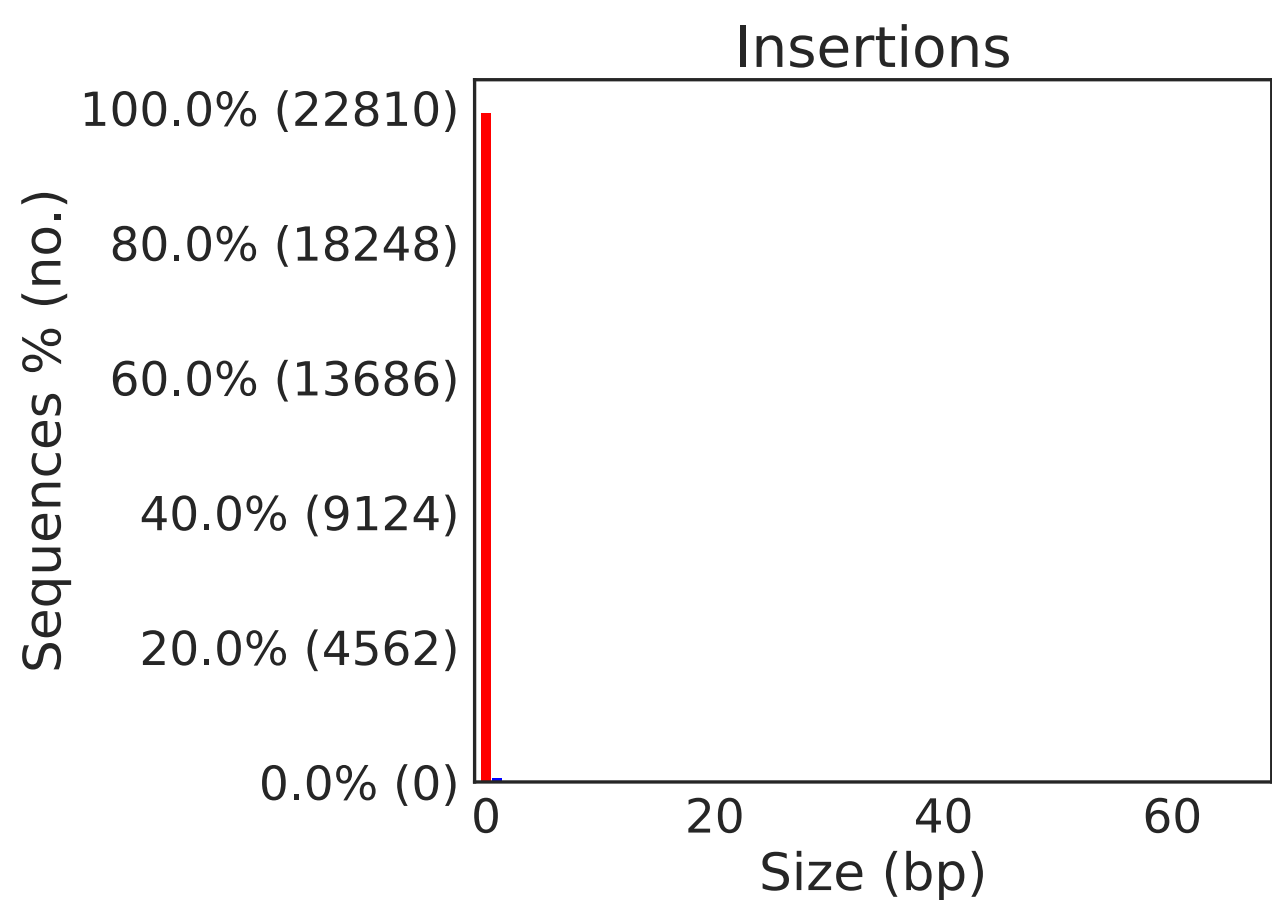

— Insertion  
— Non-insertion

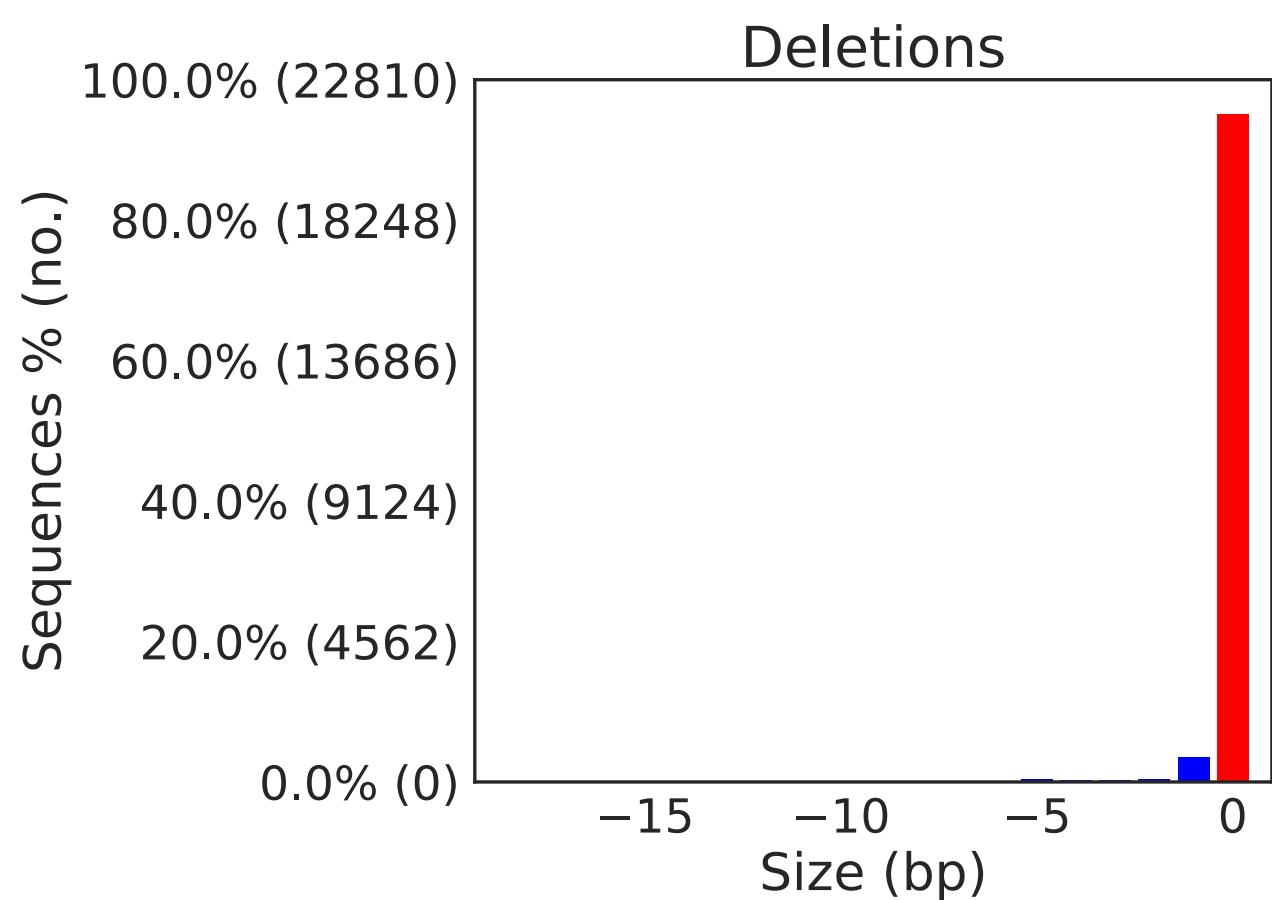

— Deletion  
— Non-deletion

# *Tmc<sup>Bth/WT</sup>*, SpCas9 + gRNA 2.4, WT allele

**bold** Substitutions  
 Insertions  
 - Deletions  
 - - - Predicted cleavage position

|   |   |   |   |   |   |          |   |   |   |   |   |   |   |   |   |   |   |   |   |          |   |   |   |          |          |   |   |   |   |   |   |   |   |   |   |   |   |   |                   |                      |
|---|---|---|---|---|---|----------|---|---|---|---|---|---|---|---|---|---|---|---|---|----------|---|---|---|----------|----------|---|---|---|---|---|---|---|---|---|---|---|---|---|-------------------|----------------------|
| A | A | C | A | T | G | G        | T | A | A | T | G | T | C | C | C | T | C | C | T | G        | G | G | G | A        | A        | G | T | T | C | T | G | T | C | C | C | A | C | C | C                 | Reference            |
| A | A | C | A | T | G | G        | T | A | A | T | G | T | C | C | C | T | C | C | T | <b>G</b> | G | G | G | A        | <b>T</b> | G | T | T | C | T | G | T | C | C | C | A | C | C | C                 | 94.40% (26262 reads) |
| A | A | C | A | T | G | G        | T | A | A | T | G | T | C | C | C | T | C | C | T | -        | G | G | G | A        | <b>T</b> | G | T | T | C | T | G | T | C | C | C | A | C | C | C                 | 0.59% (163 reads)    |
| A | A | C | A | T | G | G        | T | A | A | T | G | T | C | C | C | T | C | C | - | G        | G | G | A | <b>T</b> | G        | T | T | C | T | G | T | C | C | C | A | C | C | C | 0.47% (132 reads) |                      |
| A | A | C | A | T | G | G        | T | A | A | T | G | T | C | C | C | T | C | C | T | G        | G | G | - | A        | <b>T</b> | G | T | T | C | T | G | T | C | C | C | A | C | C | C                 | 0.43% (121 reads)    |
| A | A | C | A | T | G | <b>A</b> | T | A | A | T | G | T | C | C | C | T | C | C | T | G        | G | G | G | A        | <b>T</b> | G | T | T | C | T | G | T | C | C | C | A | C | C | C                 | 0.20% (57 reads)     |

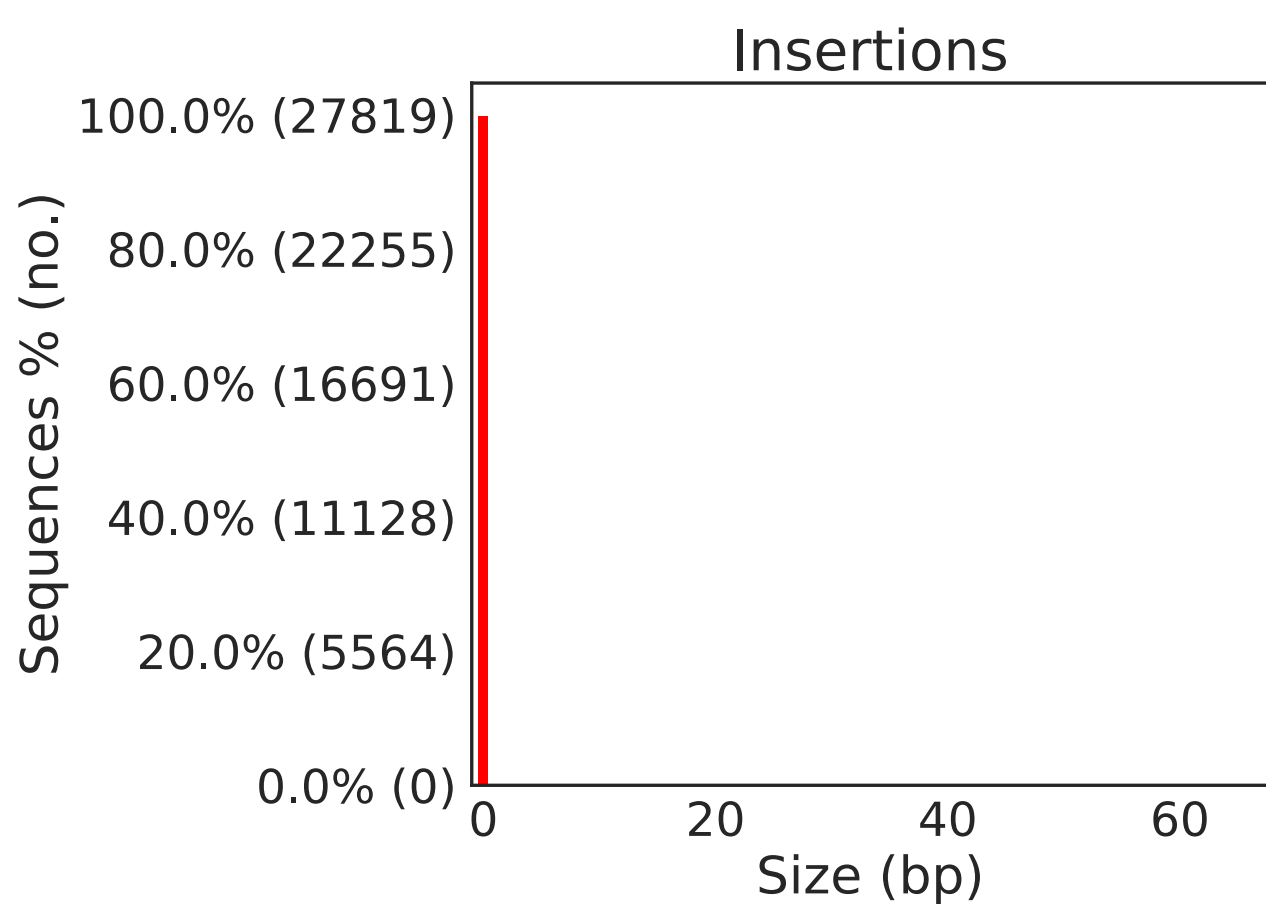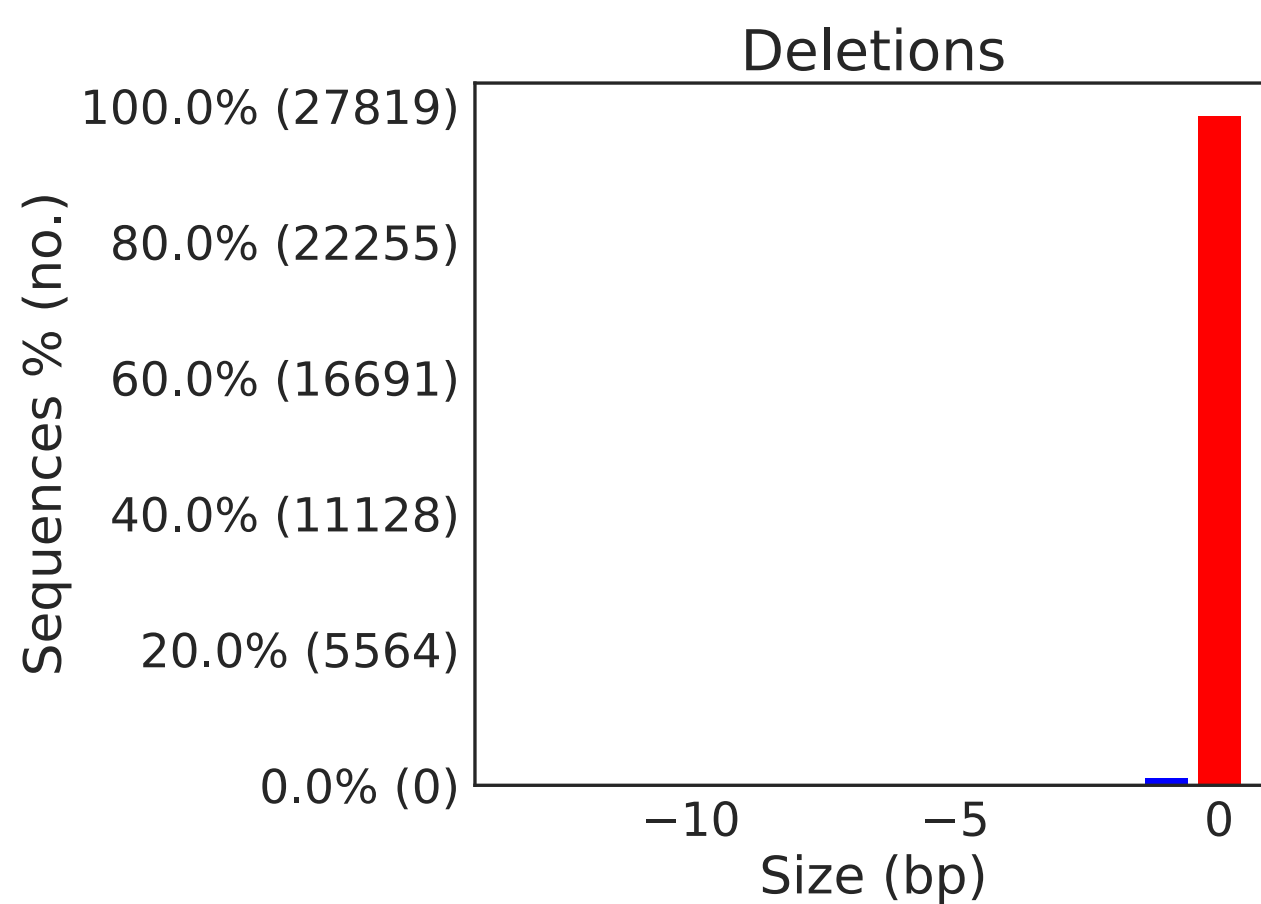

— Insertion  
— Non-insertion

— Deletion  
— Non-deletion

# *Tmc*<sup>Bth/WT</sup>, eSpCas9 + gRNA 1.1, Bth allele

**bold** Substitutions  
 Insertions  
 - Deletions  
 - - - Predicted cleavage position

|   |   |   |          |   |   |   |   |   |   |   |   |   |   |   |   |   |   |   |   |          |   |   |   |   |   |   |   |   |   |   |   |   |   |   |   |   |   |   |   |                     |                  |
|---|---|---|----------|---|---|---|---|---|---|---|---|---|---|---|---|---|---|---|---|----------|---|---|---|---|---|---|---|---|---|---|---|---|---|---|---|---|---|---|---|---------------------|------------------|
| A | T | G | G        | T | A | A | T | G | T | C | C | C | T | C | C | T | G | G | G | G        | A | A | G | T | T | C | T | G | T | C | C | C | A | C | C | C | T | G | T | Reference           |                  |
| A | T | G | G        | T | A | A | T | G | T | C | C | C | T | C | C | T | G | G | G | <b>G</b> | A | A | G | T | T | C | T | G | T | C | C | C | A | C | C | C | T | G | T | 88.47% (7643 reads) |                  |
| A | T | G | G        | T | A | A | T | G | T | C | C | C | T | C | C | T | G | G | G | -        | A | A | G | T | T | C | T | G | T | C | C | C | A | C | C | C | T | G | T | 3.16% (273 reads)   |                  |
| A | T | G | G        | T | A | A | T | G | T | C | C | C | T | C | C | T | - | G | G | <b>G</b> | A | A | G | T | T | C | T | G | T | C | C | C | A | C | C | C | T | G | T | 2.57% (222 reads)   |                  |
| A | T | G | G        | T | A | A | T | G | T | C | C | C | T | C | C | T | G | G | G | -        | - | A | A | G | T | T | C | T | G | T | C | C | C | A | C | C | C | T | G | T                   | 0.87% (75 reads) |
| A | T | G | G        | T | A | A | T | G | T | C | C | C | T | C | C | T | G | G | - | -        | A | A | G | T | T | C | T | G | T | C | C | C | A | C | C | C | T | G | T | 0.24% (21 reads)    |                  |
| A | T | G | <b>A</b> | T | A | A | T | G | T | C | C | C | T | C | C | T | G | G | G | <b>G</b> | A | A | G | T | T | C | T | G | T | C | C | C | A | C | C | C | T | G | T | 0.22% (19 reads)    |                  |

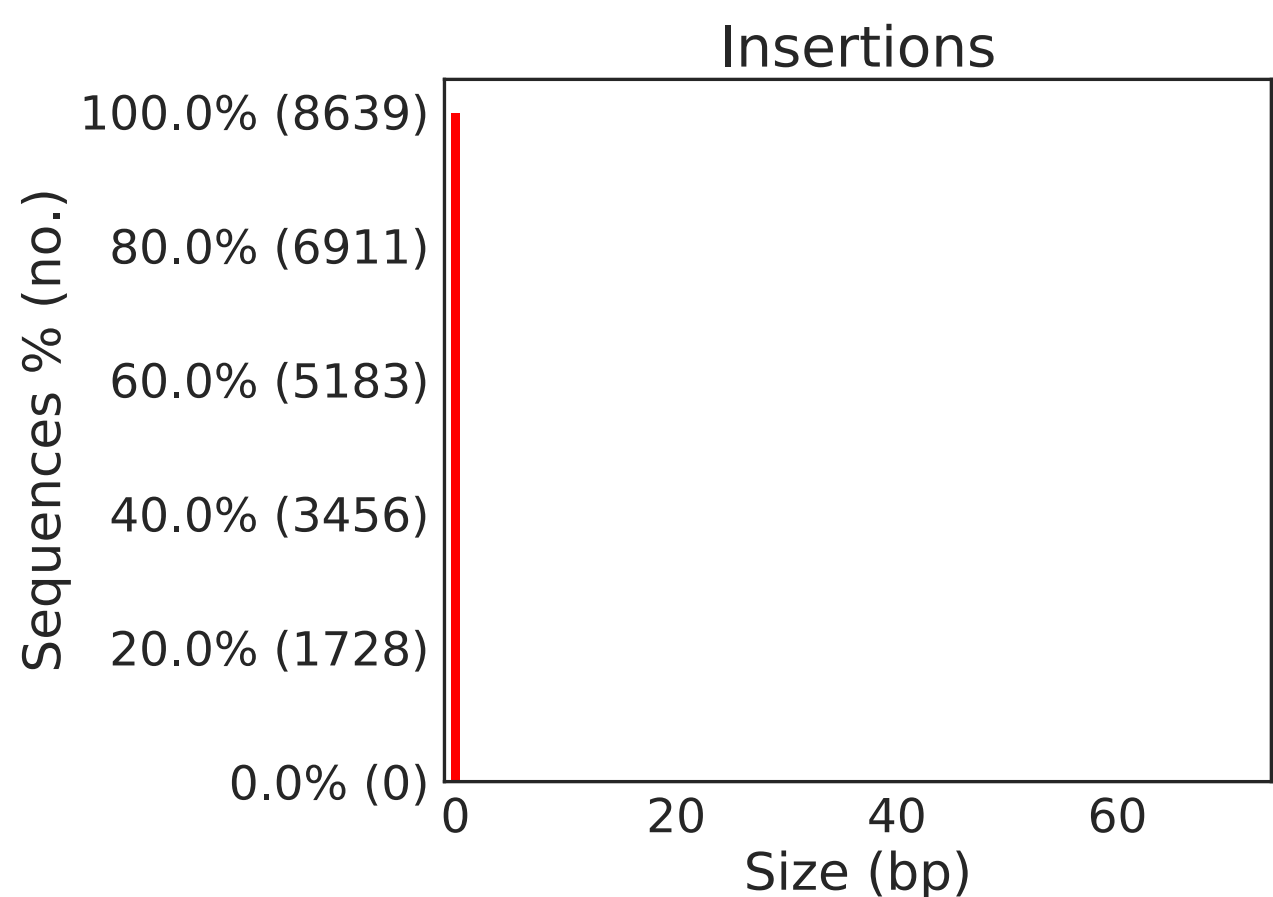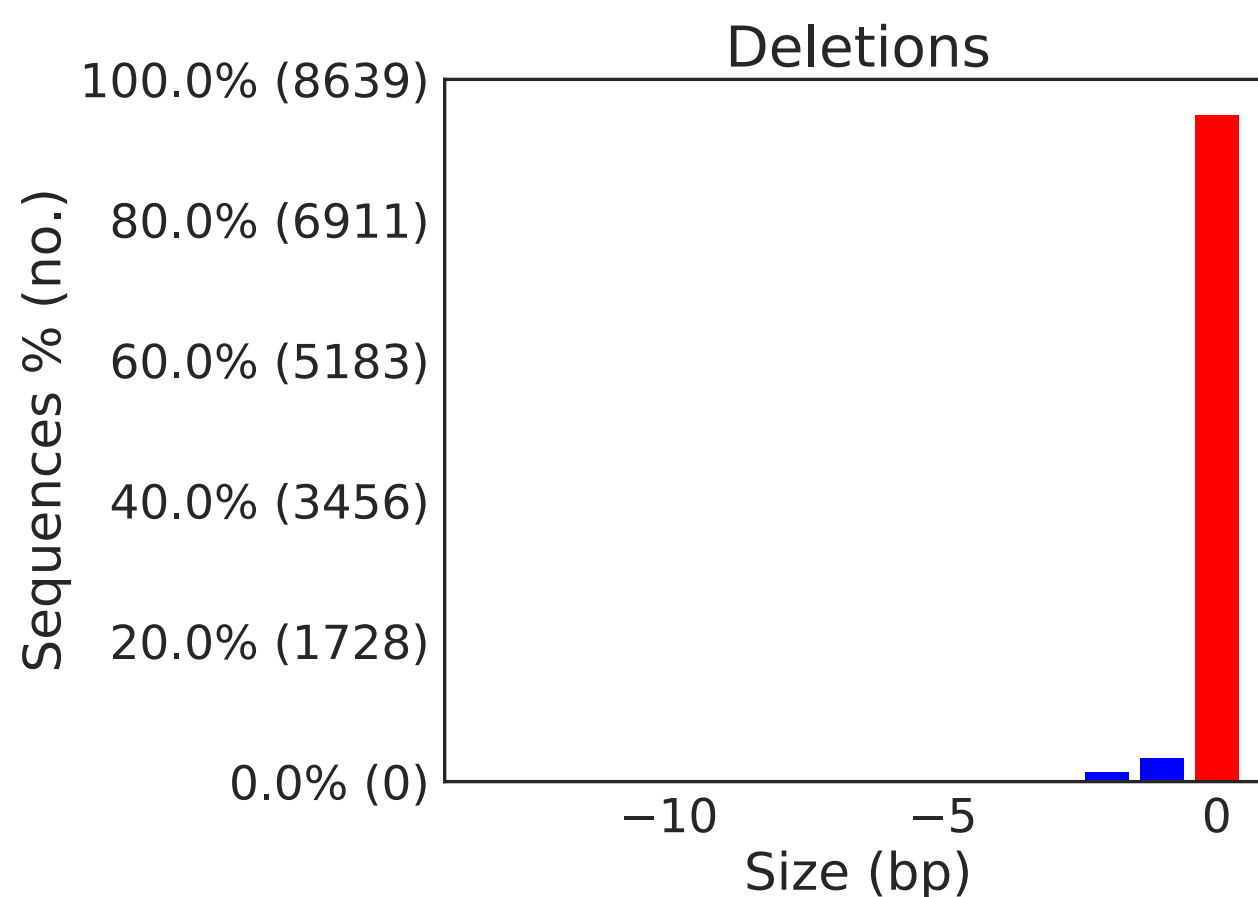

Insertion  
 Non-insertion

Deletion  
 Non-deletion

# *Tmc*<sup>Bth/WT</sup>, eSpCas9 + gRNA 1.1, WT allele

**bold** Substitutions  
  Insertions  
 - Deletions  
 - - - Predicted cleavage position

|   |   |   |   |   |   |   |   |   |   |   |   |   |   |   |   |   |   |   |   |   |          |   |          |   |   |   |   |   |   |   |   |   |   |   |   |   |   |   |   |           |                      |
|---|---|---|---|---|---|---|---|---|---|---|---|---|---|---|---|---|---|---|---|---|----------|---|----------|---|---|---|---|---|---|---|---|---|---|---|---|---|---|---|---|-----------|----------------------|
| A | T | G | G | T | A | A | T | G | T | C | C | C | T | C | C | T | G | G | G | G | A        | A | G        | T | T | C | T | G | T | C | C | C | A | C | C | C | T | G | T | Reference |                      |
| A | T | G | G | T | A | A | T | G | T | C | C | C | T | C | C | T | G | G | G | G | <b>G</b> | A | <b>T</b> | G | T | T | C | T | G | T | C | C | C | A | C | C | C | T | G | T         | 94.83% (25404 reads) |
| A | T | G | G | T | A | A | T | G | T | C | C | C | T | C | C | T | G | G | G | G | -        | A | <b>T</b> | G | T | T | C | T | G | T | C | C | C | A | C | C | C | T | G | T         | 0.59% (159 reads)    |
| A | T | G | G | T | A | A | T | G | T | C | C | C | T | C | C | T | - | G | G | G | -        | A | <b>T</b> | G | T | T | C | T | G | T | C | C | C | A | C | C | C | T | G | T         | 0.57% (153 reads)    |

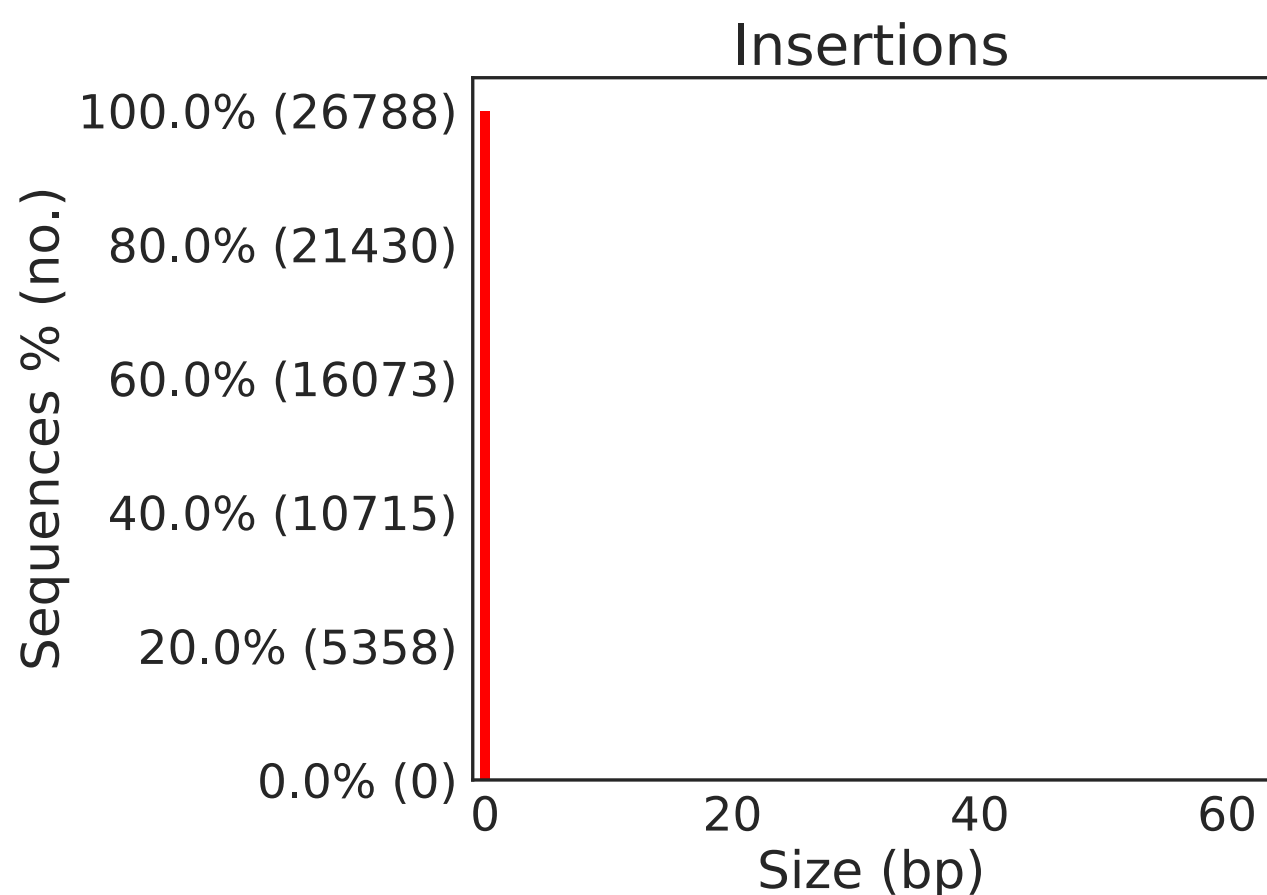

— Insertion  
 — Non-insertion

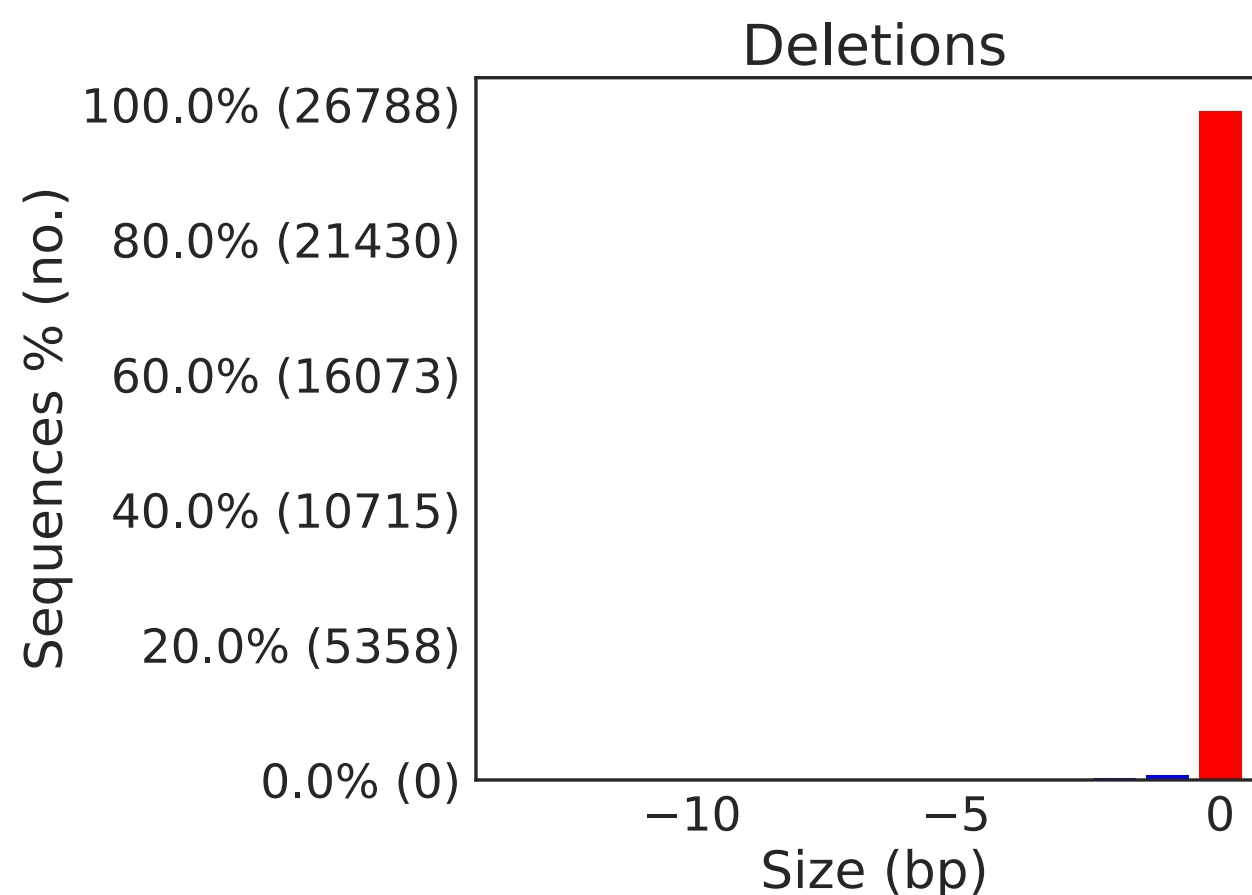

— Deletion  
 — Non-deletion

# *Tmc*<sup>Bth/WT</sup>, HypaCas9 + gRNA 1.1, Bth allele

**bold** Substitutions  
 Insertions  
 - Deletions  
 - - - Predicted cleavage position

|   |   |   |   |   |   |   |   |   |   |   |   |   |   |   |   |   |          |          |          |          |   |   |   |   |   |   |   |   |   |   |   |   |   |   |   |   |   |   |   |                     |                   |
|---|---|---|---|---|---|---|---|---|---|---|---|---|---|---|---|---|----------|----------|----------|----------|---|---|---|---|---|---|---|---|---|---|---|---|---|---|---|---|---|---|---|---------------------|-------------------|
| A | T | G | G | T | A | A | T | G | T | C | C | C | T | C | C | T | G        | G        | G        | G        | A | A | G | T | T | C | T | G | T | C | C | C | A | C | C | C | T | G | T | Reference           |                   |
| A | T | G | G | T | A | A | T | G | T | C | C | C | T | C | C | T | <b>G</b> | <b>G</b> | <b>G</b> | <b>G</b> | A | A | G | T | T | C | T | G | T | C | C | C | A | C | C | C | T | G | T | 84.94% (7655 reads) |                   |
| A | T | G | G | T | A | A | T | G | T | C | C | C | T | C | C | T | -        | G        | G        | <b>G</b> | A | A | G | T | T | C | T | G | T | C | C | C | A | C | C | C | T | G | T | 4.59% (414 reads)   |                   |
| A | T | G | G | T | A | A | T | G | T | C | C | C | T | C | C | T | G        | G        | <b>G</b> | -        | A | A | G | T | T | C | T | G | T | C | C | C | A | C | C | C | T | G | T | 4.25% (383 reads)   |                   |
| A | T | G | G | T | A | A | T | G | T | C | C | C | T | C | C | T | G        | G        | <b>G</b> | -        | - | A | A | G | T | T | C | T | G | T | C | C | C | A | C | C | C | T | G | T                   | 1.20% (108 reads) |
| A | T | G | G | T | A | A | T | G | T | C | C | C | T | C | C | T | -        | -        | <b>G</b> | <b>G</b> | A | A | G | T | T | C | T | G | T | C | C | C | A | C | C | C | T | G | T | 0.22% (20 reads)    |                   |

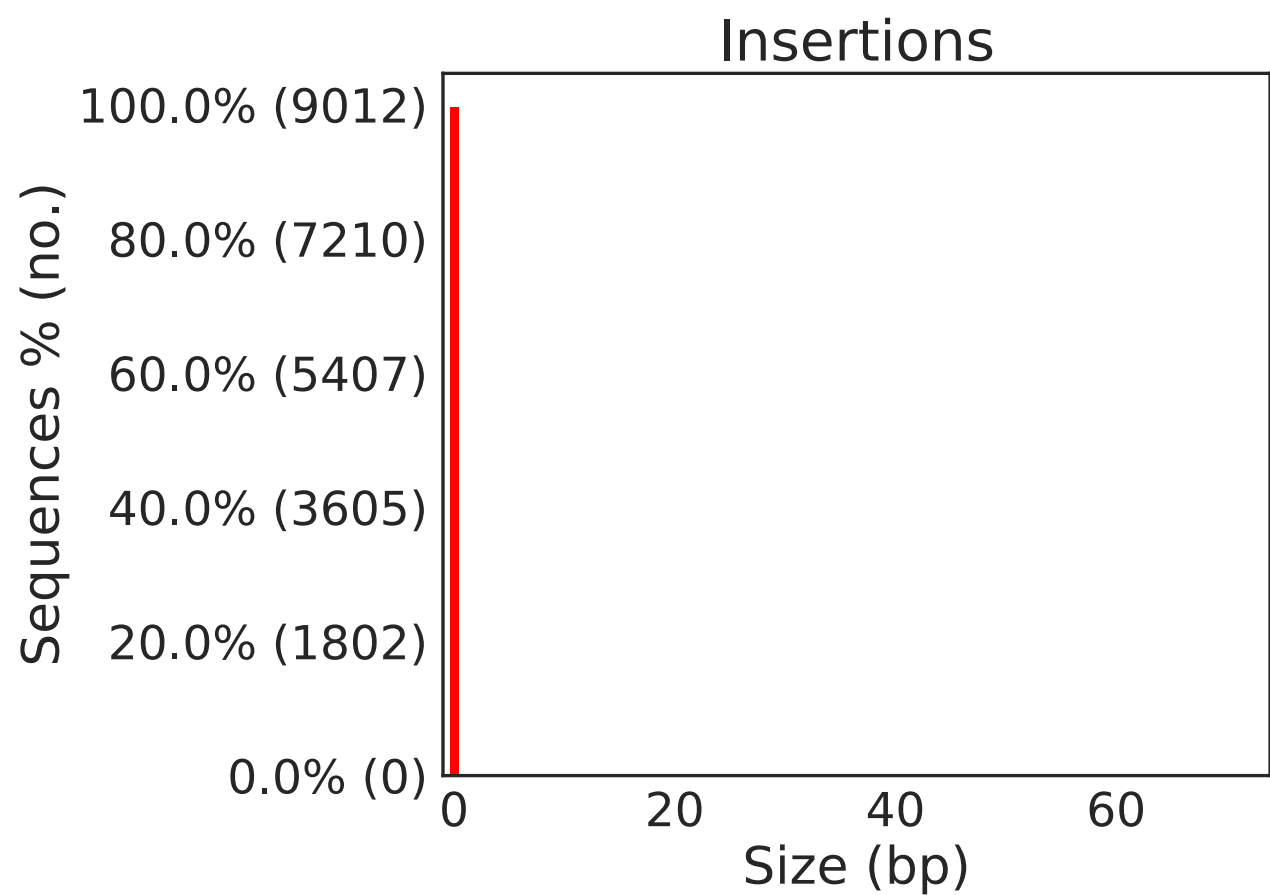

█ Insertion  
█ Non-insertion

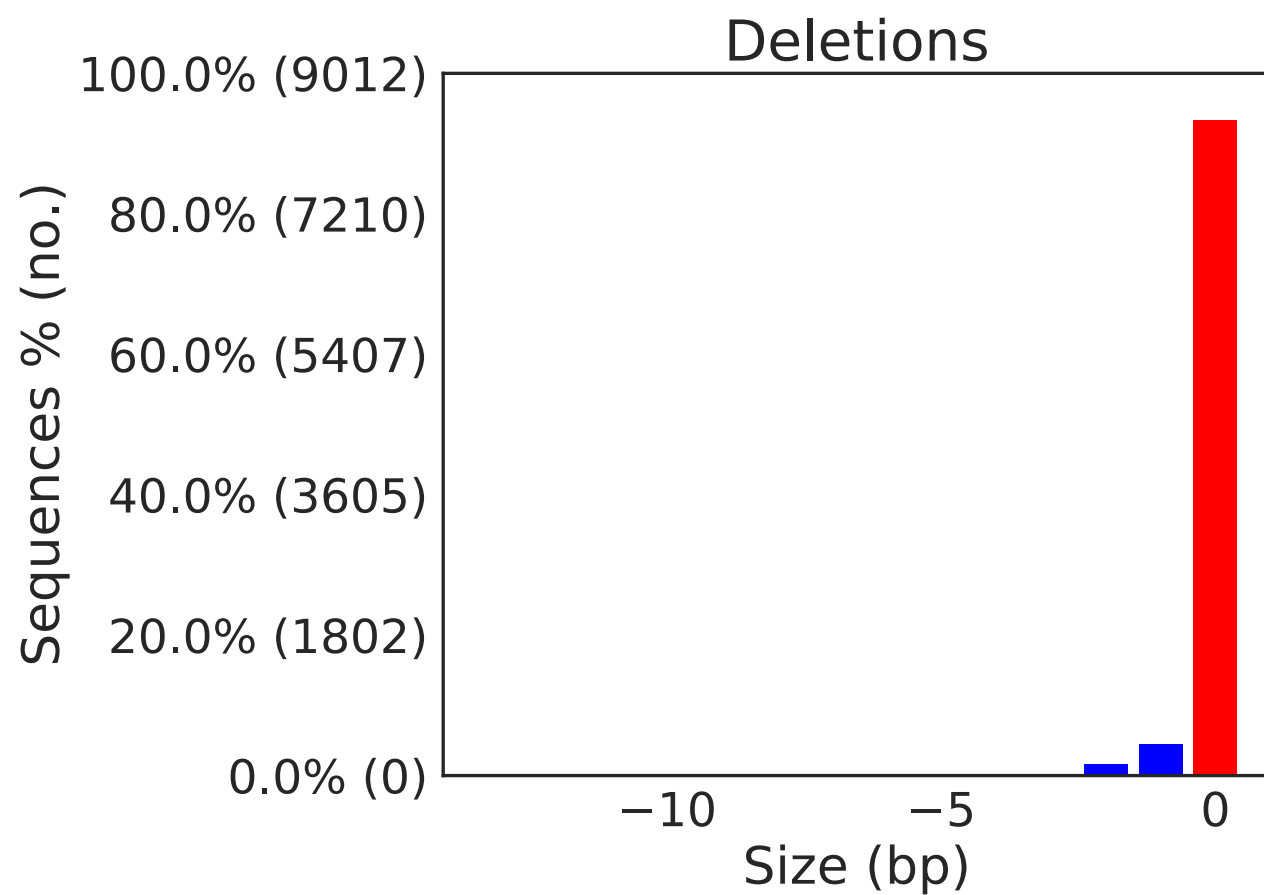

█ Deletion  
█ Non-deletion

# *Tmc*<sup>Bth/WT</sup>, HypaCas9 + gRNA 1.1, WT allele

**bold** Substitutions  
  Insertions  
 - Deletions  
 - - - Predicted cleavage position

|   |   |   |   |   |   |   |   |   |   |   |   |   |   |   |   |   |   |   |   |   |   |          |   |   |   |   |   |   |   |   |   |   |   |   |   |   |   |   |   |                      |
|---|---|---|---|---|---|---|---|---|---|---|---|---|---|---|---|---|---|---|---|---|---|----------|---|---|---|---|---|---|---|---|---|---|---|---|---|---|---|---|---|----------------------|
| A | T | G | G | T | A | A | T | G | T | C | C | C | T | C | C | T | G | G | G | G | A | A        | G | T | T | C | T | G | T | C | C | C | A | C | C | C | T | G | T | Reference            |
| A | T | G | G | T | A | A | T | G | T | C | C | C | T | C | C | T | G | G | G | G | A | <b>T</b> | G | T | T | C | T | G | T | C | C | C | A | C | C | C | T | G | T | 94.72% (25129 reads) |
| A | T | G | G | T | A | A | T | G | T | C | C | C | T | C | C | T | G | G | G | G | A | <b>T</b> | G | T | T | C | T | G | T | C | C | C | A | C | C | C | T | G | T | 0.64% (169 reads)    |
| A | T | G | G | T | A | A | T | G | T | C | C | C | T | C | C | T | - | G | G | G | A | <b>T</b> | G | T | T | C | T | G | T | C | C | C | A | C | C | C | T | G | T | 0.62% (164 reads)    |

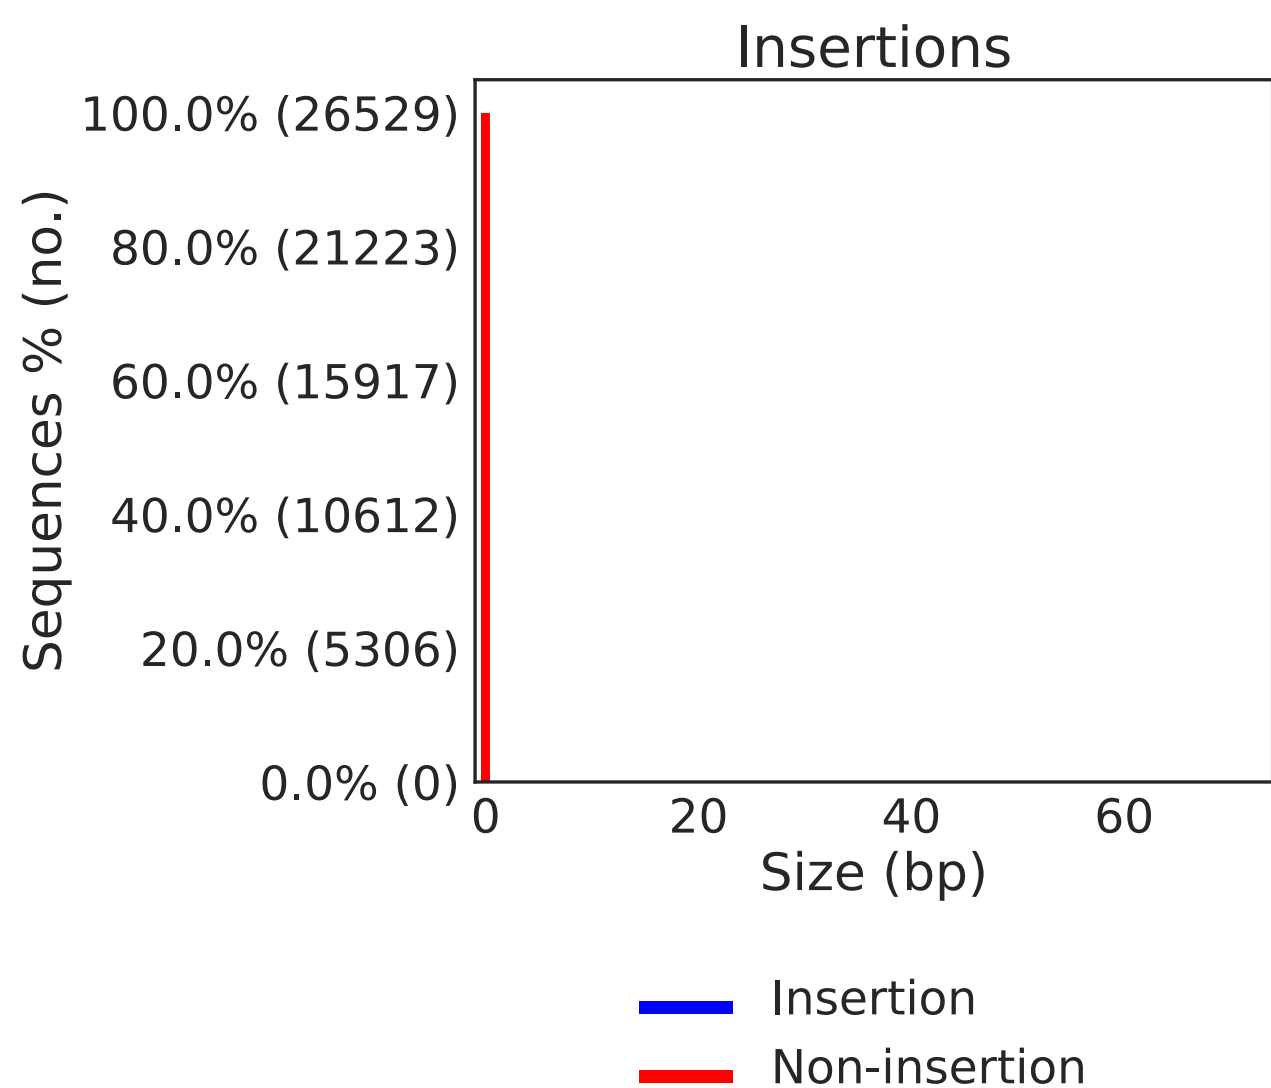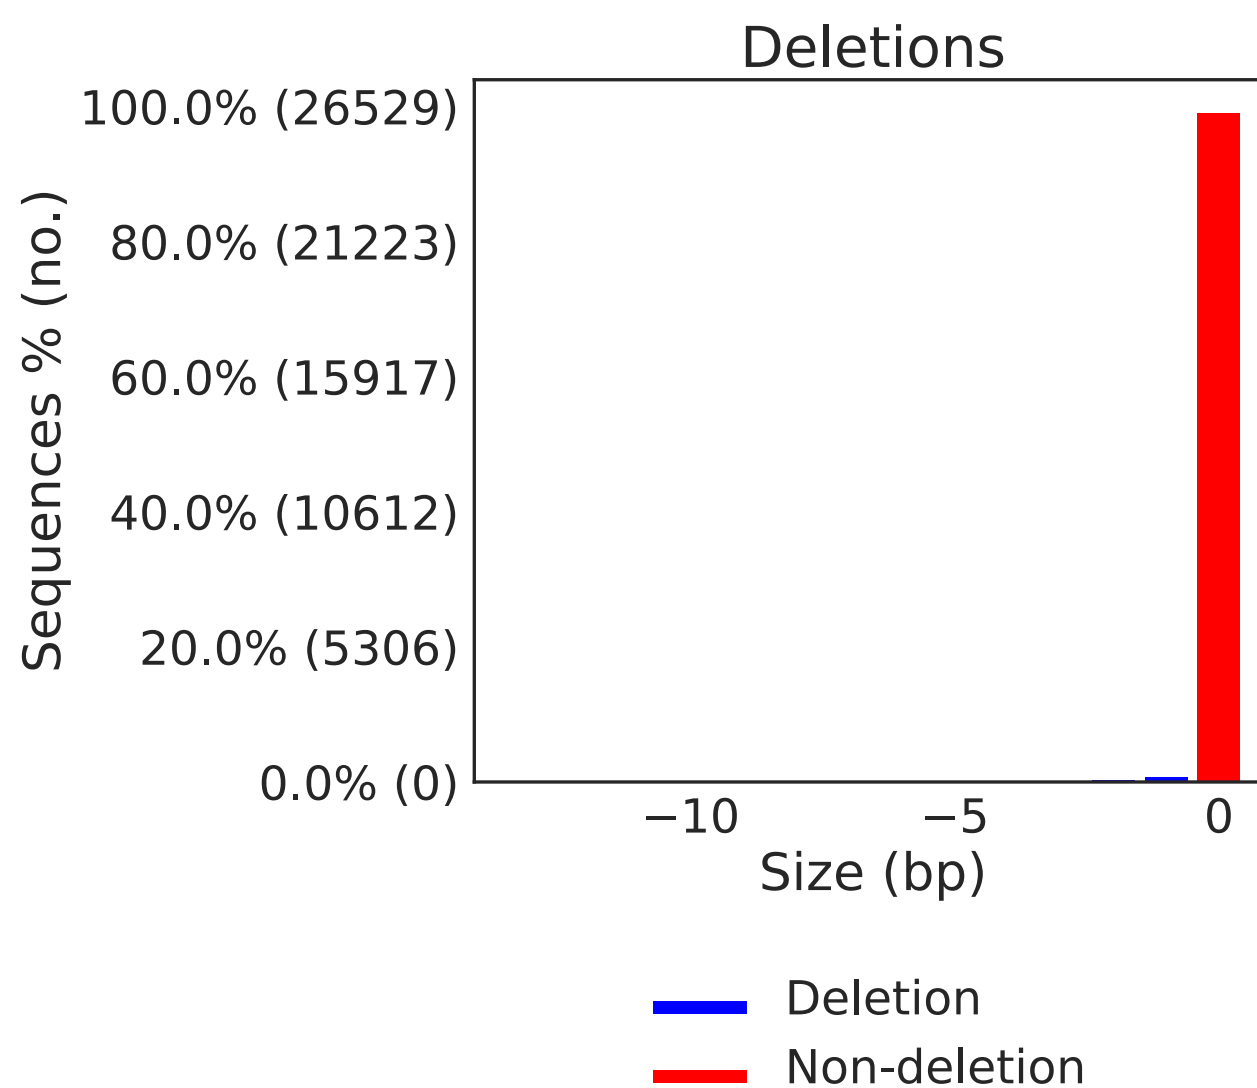



# *Tmc*<sup>Bth/WT</sup>, SpCas9-HF1 + gRNA 1.1, Bth allele

**bold** Substitutions  
 Insertions  
 - Deletions  
 - - - Predicted cleavage position

|   |   |   |   |   |   |   |   |   |   |   |   |   |   |   |   |   |          |          |          |          |          |          |          |   |   |   |   |   |   |   |   |   |   |   |   |   |   |   |   |                     |
|---|---|---|---|---|---|---|---|---|---|---|---|---|---|---|---|---|----------|----------|----------|----------|----------|----------|----------|---|---|---|---|---|---|---|---|---|---|---|---|---|---|---|---|---------------------|
| A | T | G | G | T | A | A | T | G | T | C | C | C | T | C | C | T | G        | G        | G        | G        | A        | A        | G        | T | T | C | T | G | T | C | C | C | A | C | C | C | T | G | T | Reference           |
| A | T | G | G | T | A | A | T | G | T | C | C | C | T | C | C | T | <b>G</b> | <b>G</b> | <b>G</b> | <b>G</b> | <b>A</b> | <b>A</b> | <b>G</b> | T | T | C | T | G | T | C | C | C | A | C | C | C | T | G | T | 87.66% (9002 reads) |
| A | T | G | G | T | A | A | T | G | T | C | C | C | T | C | C | T | -        | G        | G        | <b>G</b> | <b>A</b> | <b>A</b> | <b>G</b> | T | T | C | T | G | T | C | C | C | A | C | C | C | T | G | T | 3.51% (360 reads)   |
| A | T | G | G | T | A | A | T | G | T | C | C | C | T | C | C | T | G        | G        | <b>G</b> | -        | <b>A</b> | <b>A</b> | <b>G</b> | T | T | C | T | G | T | C | C | C | A | C | C | C | T | G | T | 3.22% (331 reads)   |
| A | T | G | G | T | A | A | T | G | T | C | C | C | T | C | C | T | G        | G        | <b>G</b> | -        | -        | <b>A</b> | <b>G</b> | T | T | C | T | G | T | C | C | C | A | C | C | C | T | G | T | 0.96% (99 reads)    |
| A | T | G | G | T | A | A | T | G | T | C | C | C | T | C | C | T | G        | G        | -        | -        | <b>A</b> | <b>A</b> | <b>G</b> | T | T | C | T | G | T | C | C | C | A | C | C | C | T | G | T | 0.21% (22 reads)    |
| A | T | G | G | T | A | A | T | G | T | C | C | C | T | C | C | T | -        | -        | <b>G</b> | <b>G</b> | <b>A</b> | <b>A</b> | <b>G</b> | T | T | C | T | G | T | C | C | C | A | C | C | C | T | G | T | 0.20% (21 reads)    |

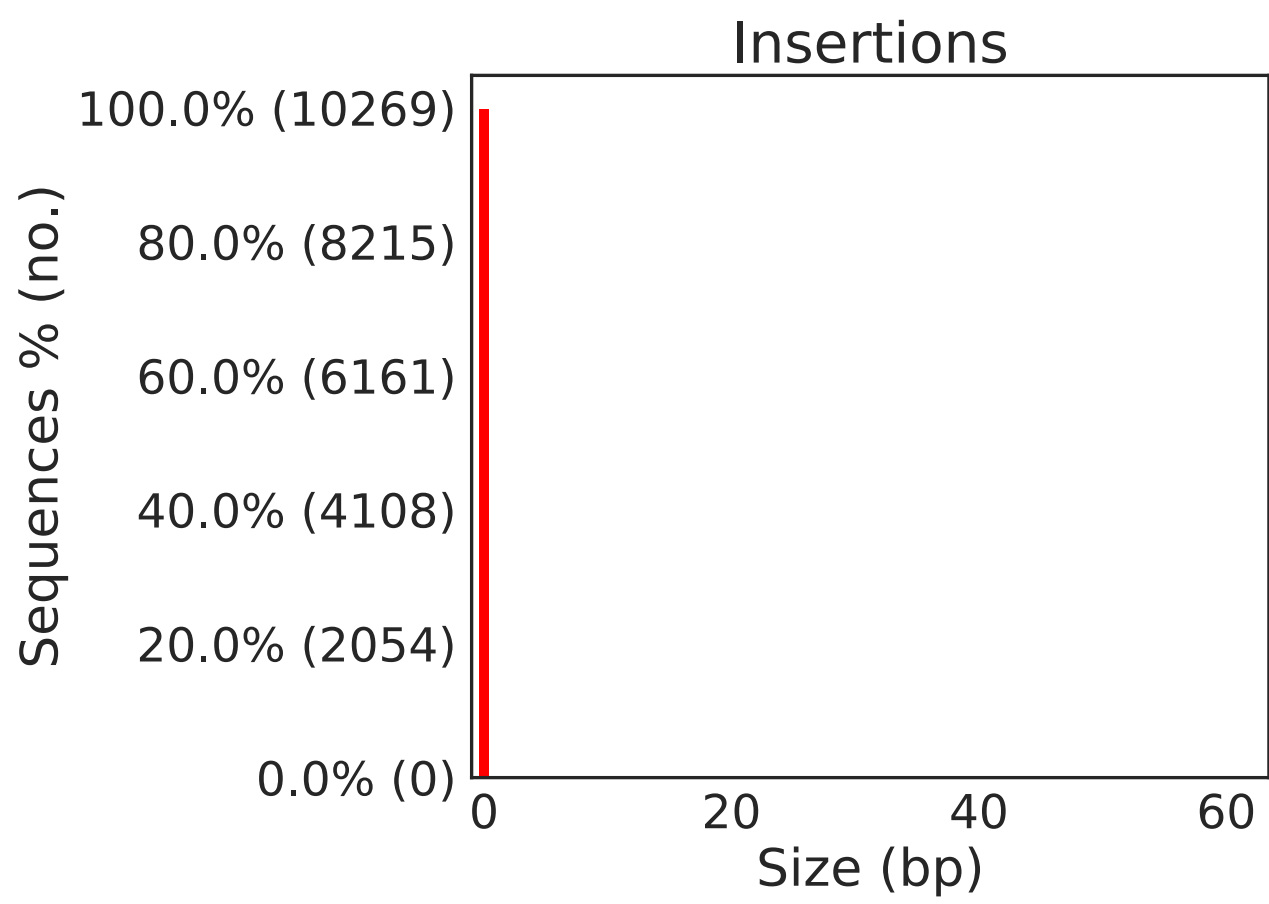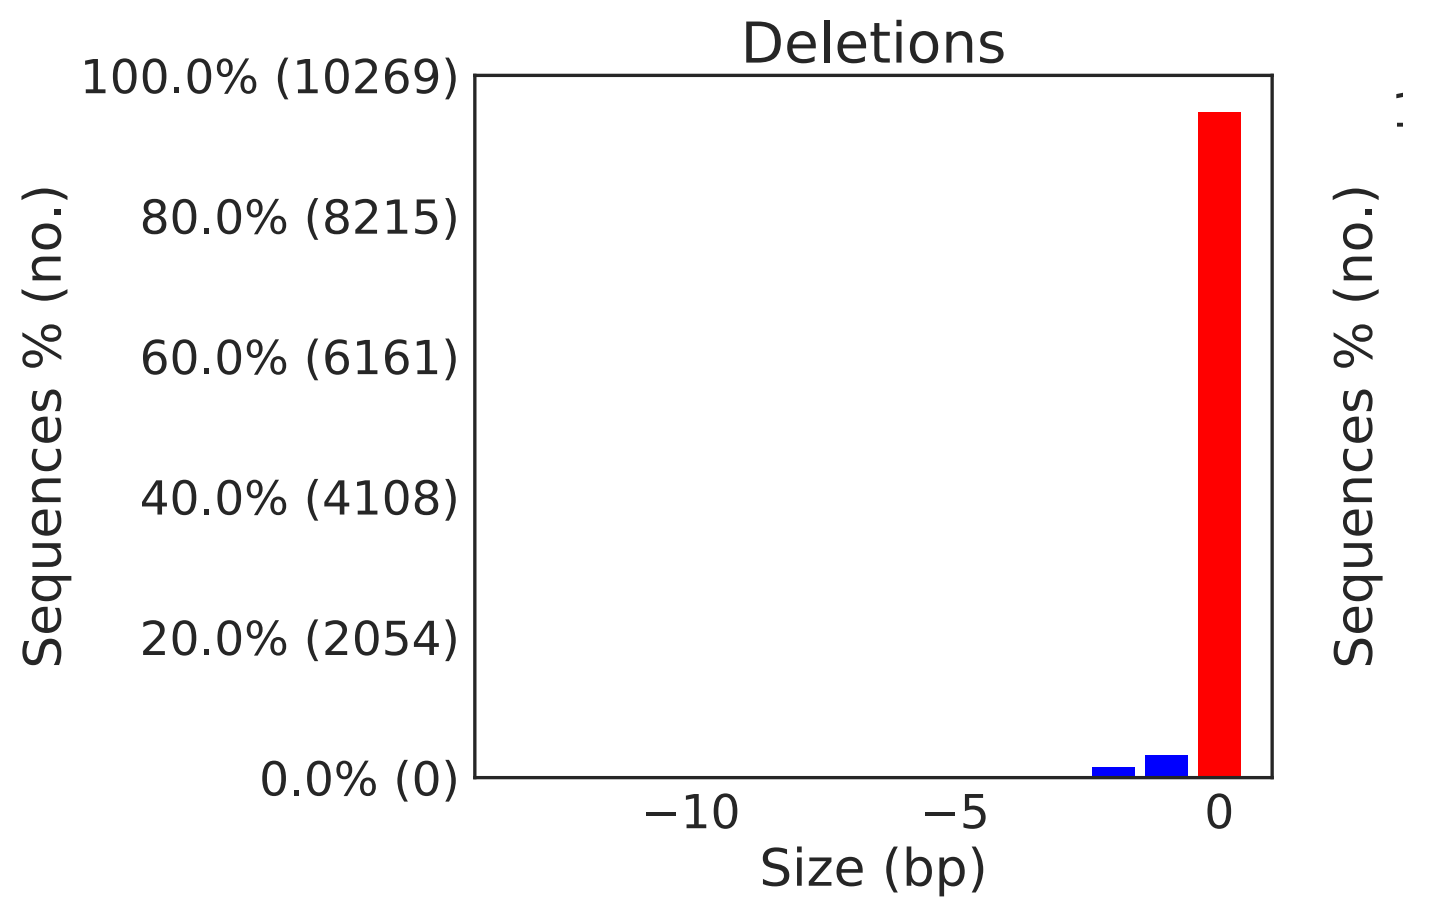

█ Insertion  
█ Non-insertion

█ Deletion  
█ Non-deletion

# *Tmc*<sup>Bth/WT</sup>, SpCas9-HF1 + gRNA 1.1, WT allele

**bold** Substitutions  
 Insertions  
 - Deletions  
 - - - Predicted cleavage position

|   |   |   |   |   |   |   |   |   |   |   |   |   |   |   |   |   |   |   |   |   |   |   |   |   |   |   |   |   |   |   |   |   |   |   |   |   |   |   |   |           |                      |
|---|---|---|---|---|---|---|---|---|---|---|---|---|---|---|---|---|---|---|---|---|---|---|---|---|---|---|---|---|---|---|---|---|---|---|---|---|---|---|---|-----------|----------------------|
| A | T | G | G | T | A | A | T | G | T | C | C | C | T | C | C | T | G | G | G | G | A | A | G | T | T | C | T | G | T | C | C | C | A | C | C | C | T | G | T | Reference |                      |
| A | T | G | G | T | A | A | T | G | T | C | C | C | T | C | C | T | G | G | G | G | G | A | A | G | T | T | C | T | G | T | C | C | C | A | C | C | C | T | G | T         | 94.96% (20010 reads) |
| A | T | G | G | T | A | A | T | G | T | C | C | C | T | C | C | T | G | G | G | G | G | A | A | G | T | T | C | T | G | T | C | C | C | A | C | C | C | T | G | T         | 0.66% (140 reads)    |
| A | T | G | G | T | A | A | T | G | T | C | C | C | T | C | C | T | G | G | G | G | G | A | A | G | T | T | C | T | G | T | C | C | C | A | C | C | C | T | G | T         | 0.64% (135 reads)    |

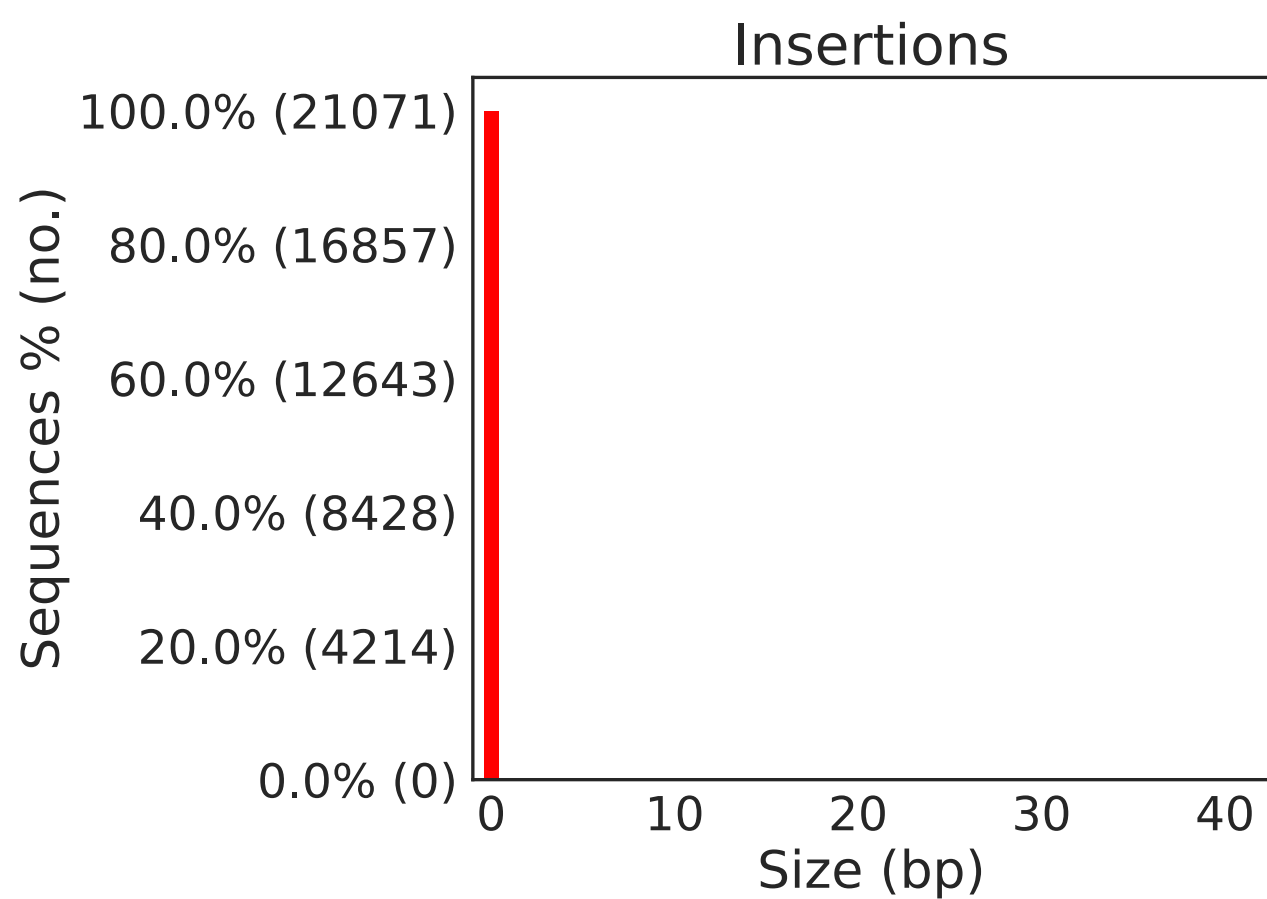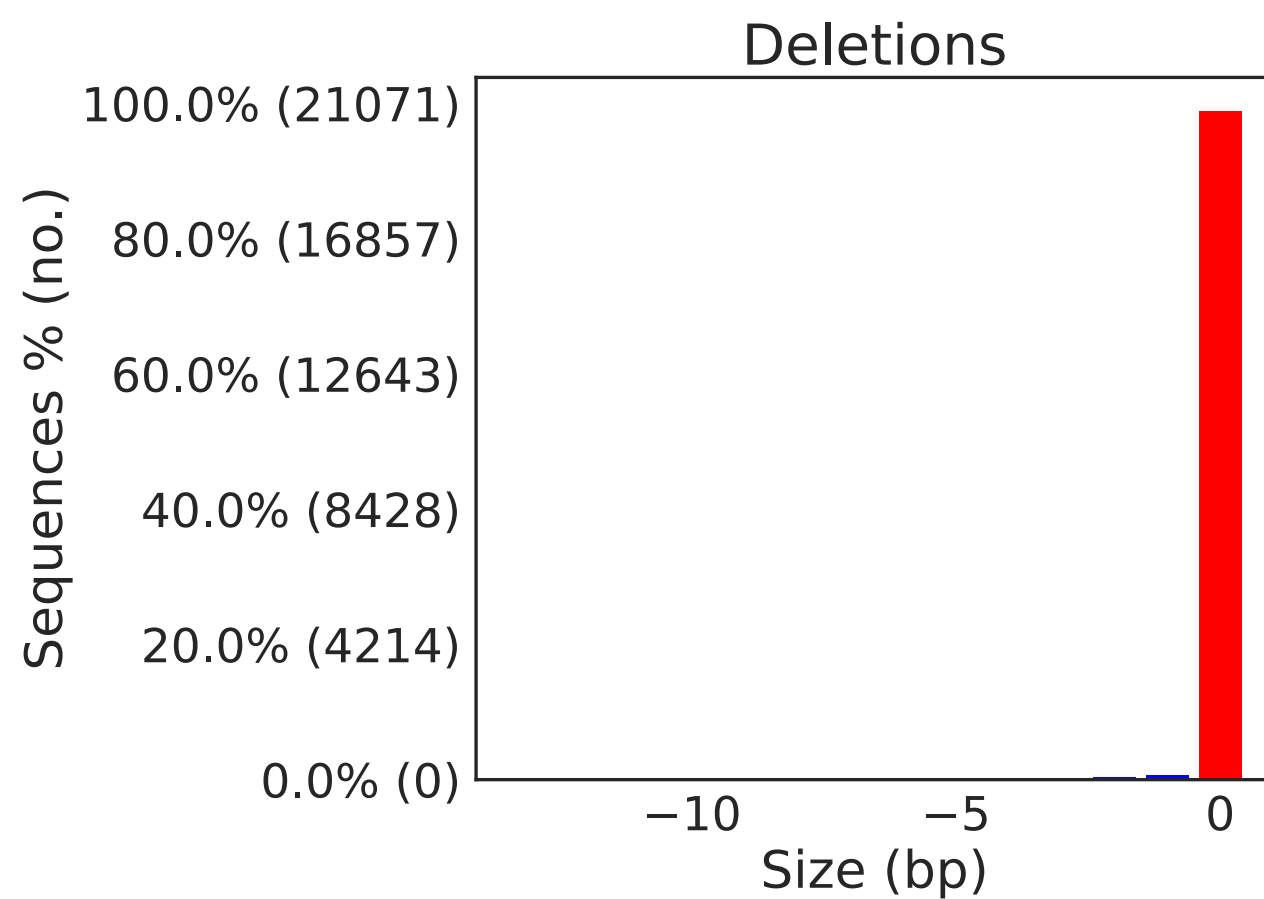

— Insertion  
— Non-insertion

— Deletion  
— Non-deletion

# *Tmc*<sup>Bth/WT</sup>, SaCas9<sup>KKH</sup> + gRNA 4.1, Bth allele

**bold** Substitutions  
  Insertions  
 - Deletions  
 - - - Predicted cleavage position

|   |   |   |   |   |   |   |   |   |   |   |   |   |   |   |   |   |   |   |   |   |   |   |   |   |   |   |   |   |   |   |   |   |   |   |   |   |   |   |   |                      |
|---|---|---|---|---|---|---|---|---|---|---|---|---|---|---|---|---|---|---|---|---|---|---|---|---|---|---|---|---|---|---|---|---|---|---|---|---|---|---|---|----------------------|
| G | A | A | C | A | T | G | G | T | A | A | T | G | T | C | C | C | T | C | C | T | G | G | G | G | A | A | G | T | T | C | T | G | T | C | C | C | A | C | C | Reference            |
| G | A | A | C | A | T | G | G | T | A | A | T | G | T | C | C | C | T | C | C | T | G | G | G | G | A | A | G | T | T | C | T | G | T | C | C | C | A | C | C | 91.17% (32886 reads) |
| G | A | A | C | A | T | G | G | T | A | A | T | G | T | C | C | C | T | C | C | - | G | G | G | G | A | A | G | T | T | C | T | G | T | C | C | C | A | C | C | 2.90% (1047 reads)   |
| G | A | A | C | A | T | G | G | T | A | A | T | G | T | C | C | C | T | C | - | T | G | G | G | G | A | A | G | T | T | C | T | G | T | C | C | C | A | C | C | 0.45% (161 reads)    |
| G | A | A | C | A | T | G | G | T | A | A | T | G | T | C | C | C | T | - | C | T | G | G | G | G | A | A | G | T | T | C | T | G | T | C | C | C | A | C | C | 0.44% (159 reads)    |
| G | A | A | C | A | T | G | G | T | A | A | T | G | T | C | C | C | T | - | - | - | G | G | G | G | A | A | G | T | T | C | T | G | T | C | C | C | A | C | C | 0.42% (150 reads)    |
| G | A | A | C | A | T | G | G | T | A | A | T | G | T | C | - | - | - | C | C | T | G | G | G | G | A | A | G | T | T | C | T | G | T | C | C | C | A | C | C | 0.39% (142 reads)    |
| G | A | A | C | A | T | G | G | T | A | A | T | G | T | C | C | C | T | - | - | T | G | G | G | G | A | A | G | T | T | C | T | G | T | C | C | C | A | C | C | 0.27% (98 reads)     |
| G | A | A | C | A | T | G | G | T | A | A | T | G | T | C | C | C | T | - | - | - | G | G | G | G | A | A | G | T | T | C | T | G | T | C | C | C | A | C | C | 0.24% (86 reads)     |

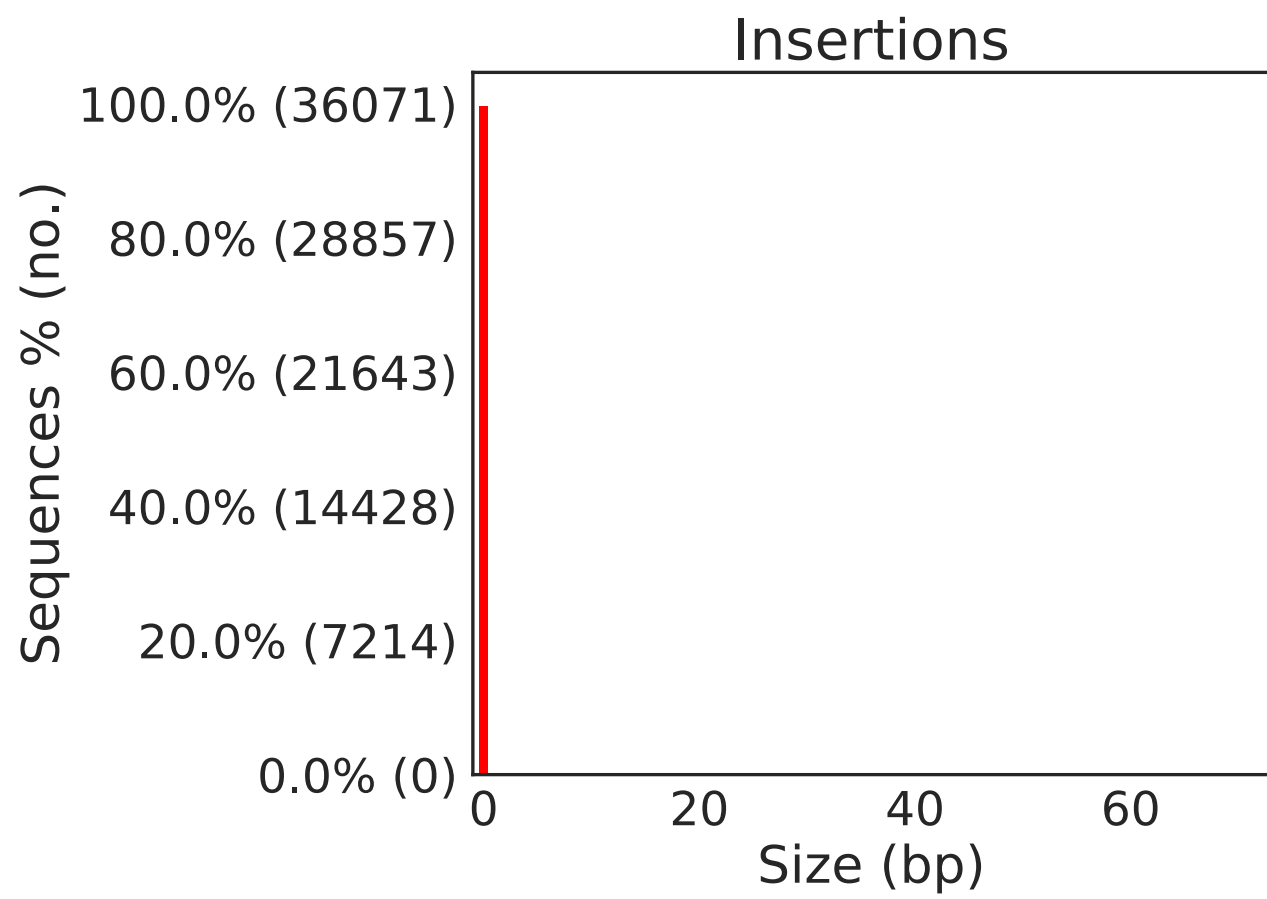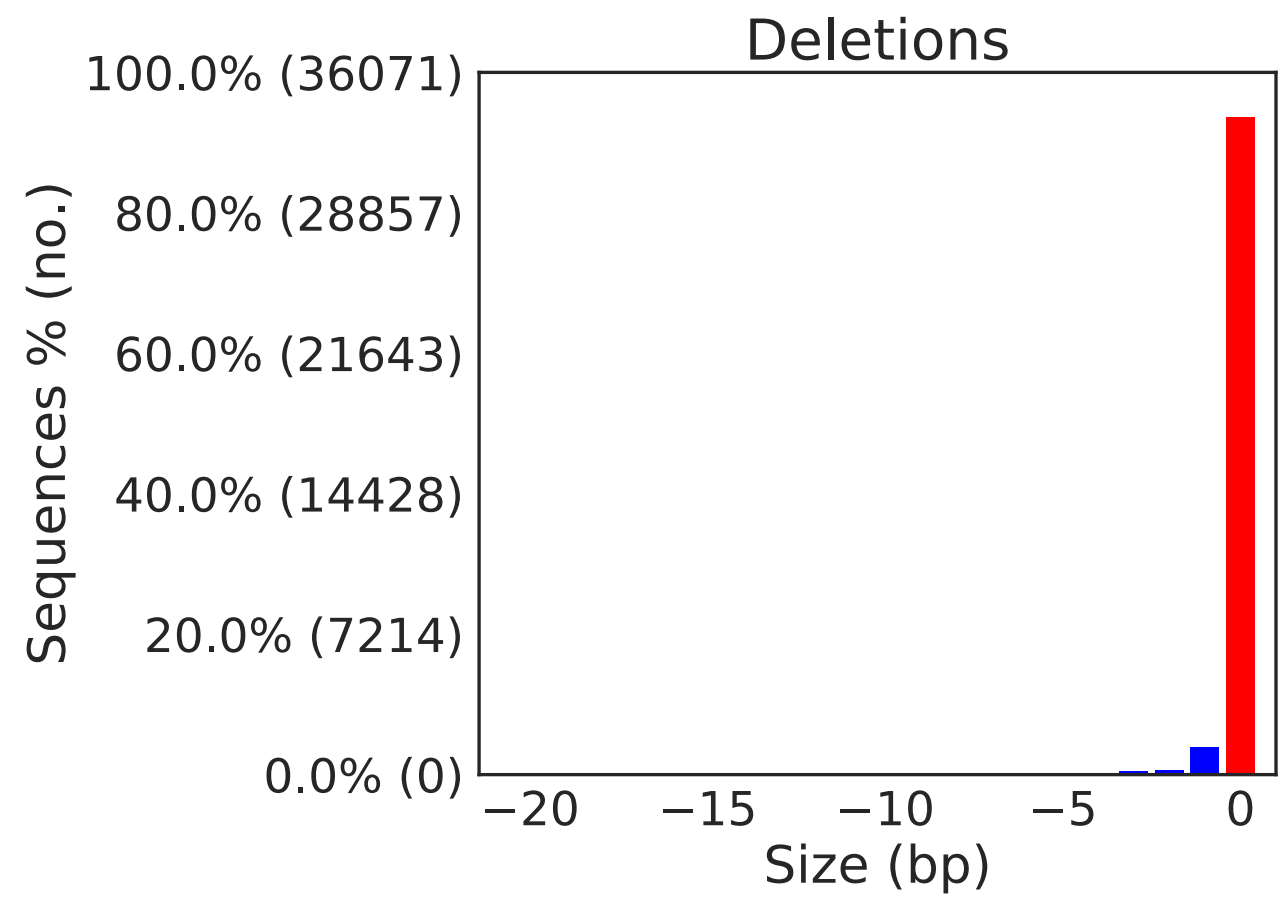

█ Insertion  
█ Non-insertion

█ Deletion  
█ Non-deletion

# *Tmc*<sup>Bth/WT</sup>, SaCas9<sup>KKH</sup> + gRNA 4.1, WT allele

**bold** Substitutions  
 Insertions  
 - Deletions  
 - - - Predicted cleavage position

G A A C A T G G T A A T G T C C C T C C T G G G G A A G T T C T G T C C C A C C Reference  
 G A A C A T G G T A A T G T C C C T C C **T** G G G G A **T** G T T C T G T C C C A C C 98.31% (35652 reads)

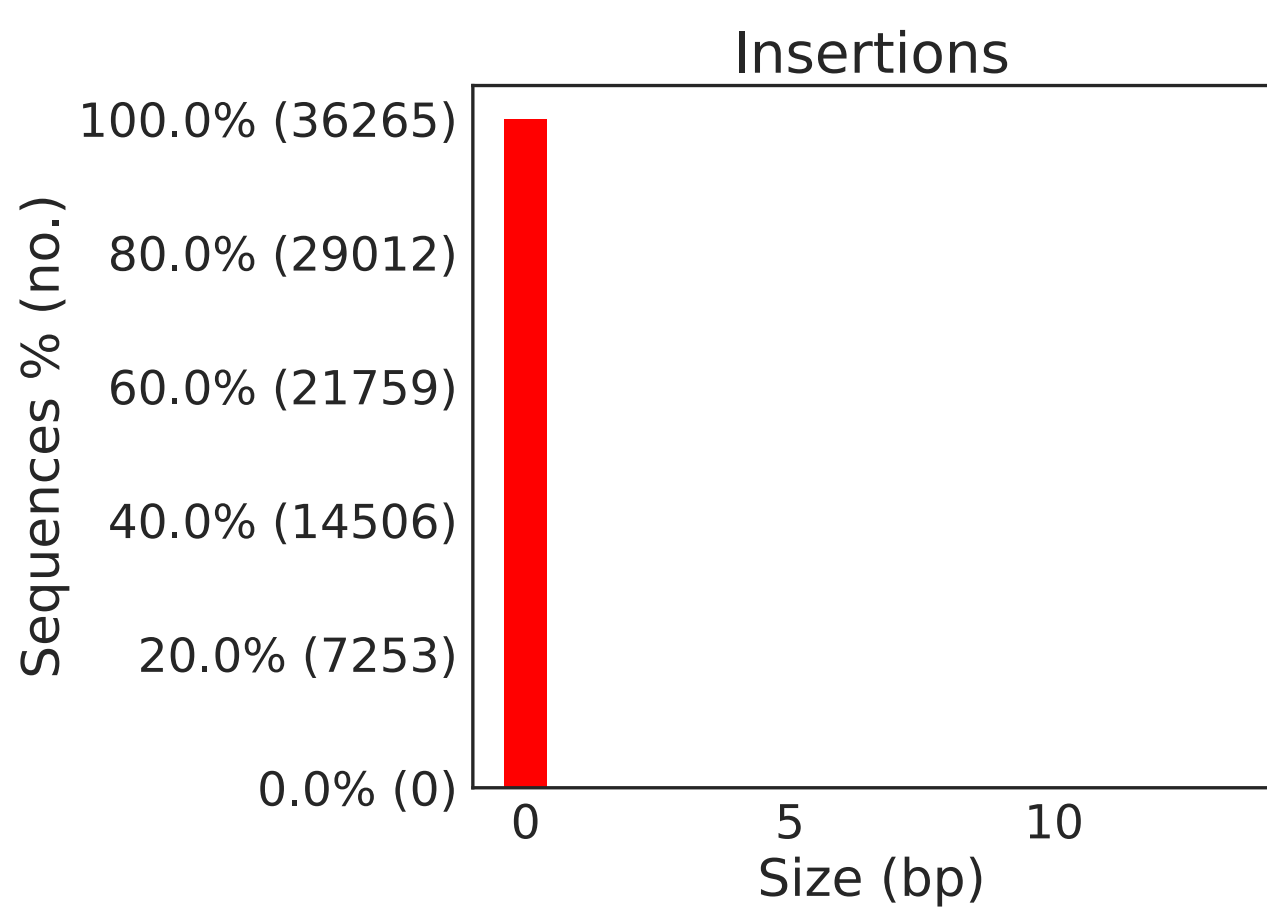

Insertion  
 Non-insertion

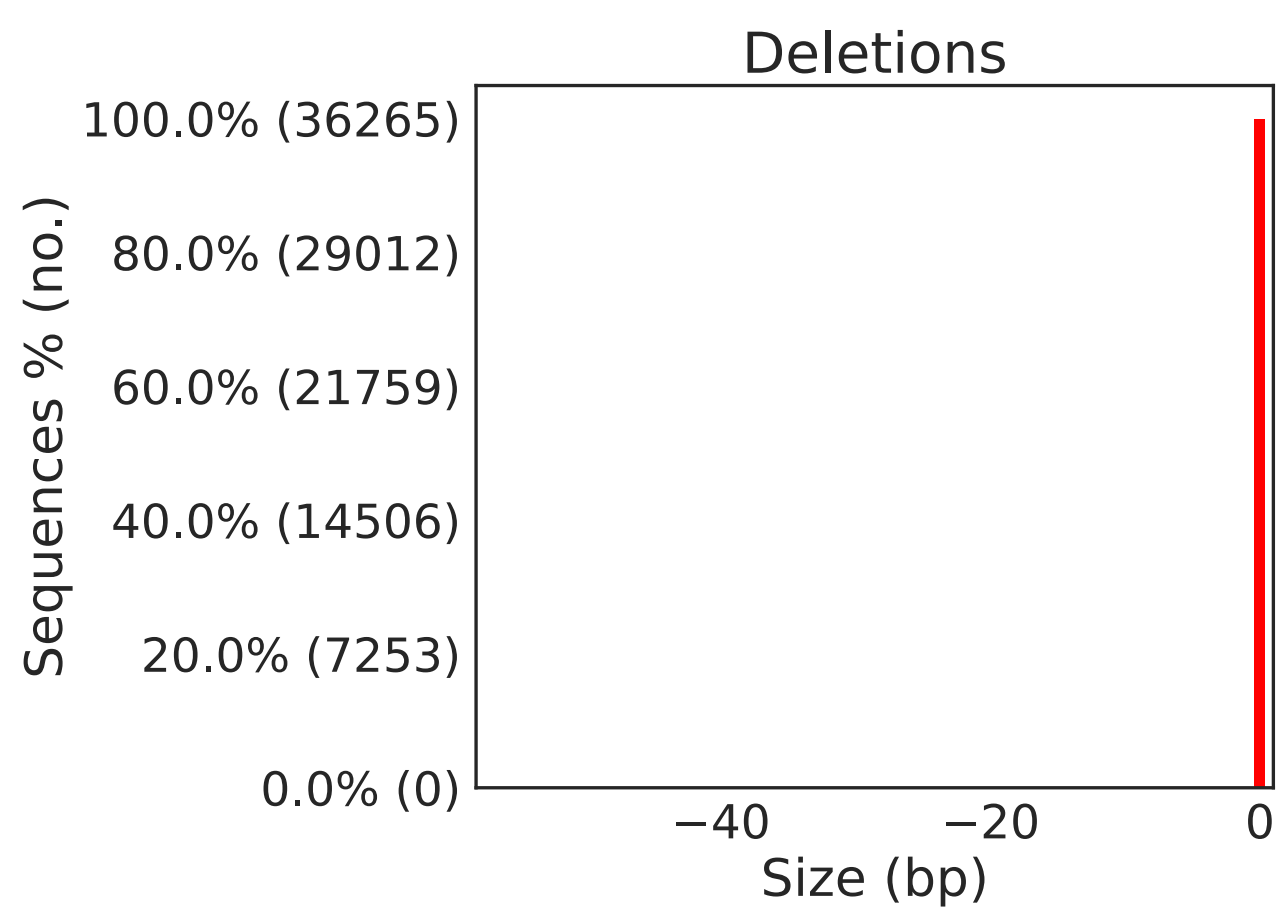

Deletion  
 Non-deletion

# *Tmc*<sup>Bth/WT</sup>, SpCas9<sup>KKH</sup> + gRNA 4.2, Bth allele

**bold** Substitutions  
 Insertions  
 - Deletions  
 - - - Predicted cleavage position

|   |   |   |   |   |   |   |   |   |   |   |   |   |   |   |   |   |   |   |   |   |   |   |   |   |   |   |   |   |   |   |   |   |   |   |   |   |   |   |   |                      |
|---|---|---|---|---|---|---|---|---|---|---|---|---|---|---|---|---|---|---|---|---|---|---|---|---|---|---|---|---|---|---|---|---|---|---|---|---|---|---|---|----------------------|
| G | A | A | C | A | T | G | G | T | A | A | T | G | T | C | C | C | T | C | C | T | G | G | G | G | A | A | G | T | T | C | T | G | T | C | C | C | A | C | C | Reference            |
| G | A | A | C | A | T | G | G | T | A | A | T | G | T | C | C | C | T | C | C | T | G | G | G | G | A | A | G | T | T | C | T | G | T | C | C | C | A | C | C | 92.13% (23333 reads) |
| G | A | A | C | A | T | G | G | T | A | A | T | G | T | C | C | C | T | C | C | - | G | G | G | G | A | A | G | T | T | C | T | G | T | C | C | C | A | C | C | 2.40% (609 reads)    |
| G | A | A | C | A | T | G | G | T | A | A | T | G | T | C | C | C | T | C | - | T | G | G | G | G | A | A | G | T | T | C | T | G | T | C | C | C | A | C | C | 0.40% (102 reads)    |
| G | A | A | C | A | T | G | G | T | A | A | T | G | T | C | C | C | T | - | - | - | G | G | G | G | A | A | G | T | T | C | T | G | T | C | C | C | A | C | C | 0.38% (95 reads)     |
| G | A | A | C | A | T | G | G | T | A | A | T | G | T | C | C | C | T | - | C | T | G | G | G | G | A | A | G | T | T | C | T | G | T | C | C | C | A | C | C | 0.33% (83 reads)     |
| G | A | A | C | A | T | G | G | T | A | A | T | G | T | C | - | - | - | C | C | T | G | G | G | G | A | A | G | T | T | C | T | G | T | C | C | C | A | C | C | 0.31% (79 reads)     |
| G | A | A | C | A | T | G | G | T | A | A | T | G | T | C | C | C | T | C | C | - | - | G | G | G | A | A | G | T | T | C | T | G | T | C | C | C | A | C | C | 0.25% (63 reads)     |
| G | A | A | C | A | T | G | G | T | A | A | T | G | T | C | C | C | T | - | - | T | G | G | G | G | A | A | G | T | T | C | T | G | T | C | C | C | A | C | C | 0.23% (58 reads)     |

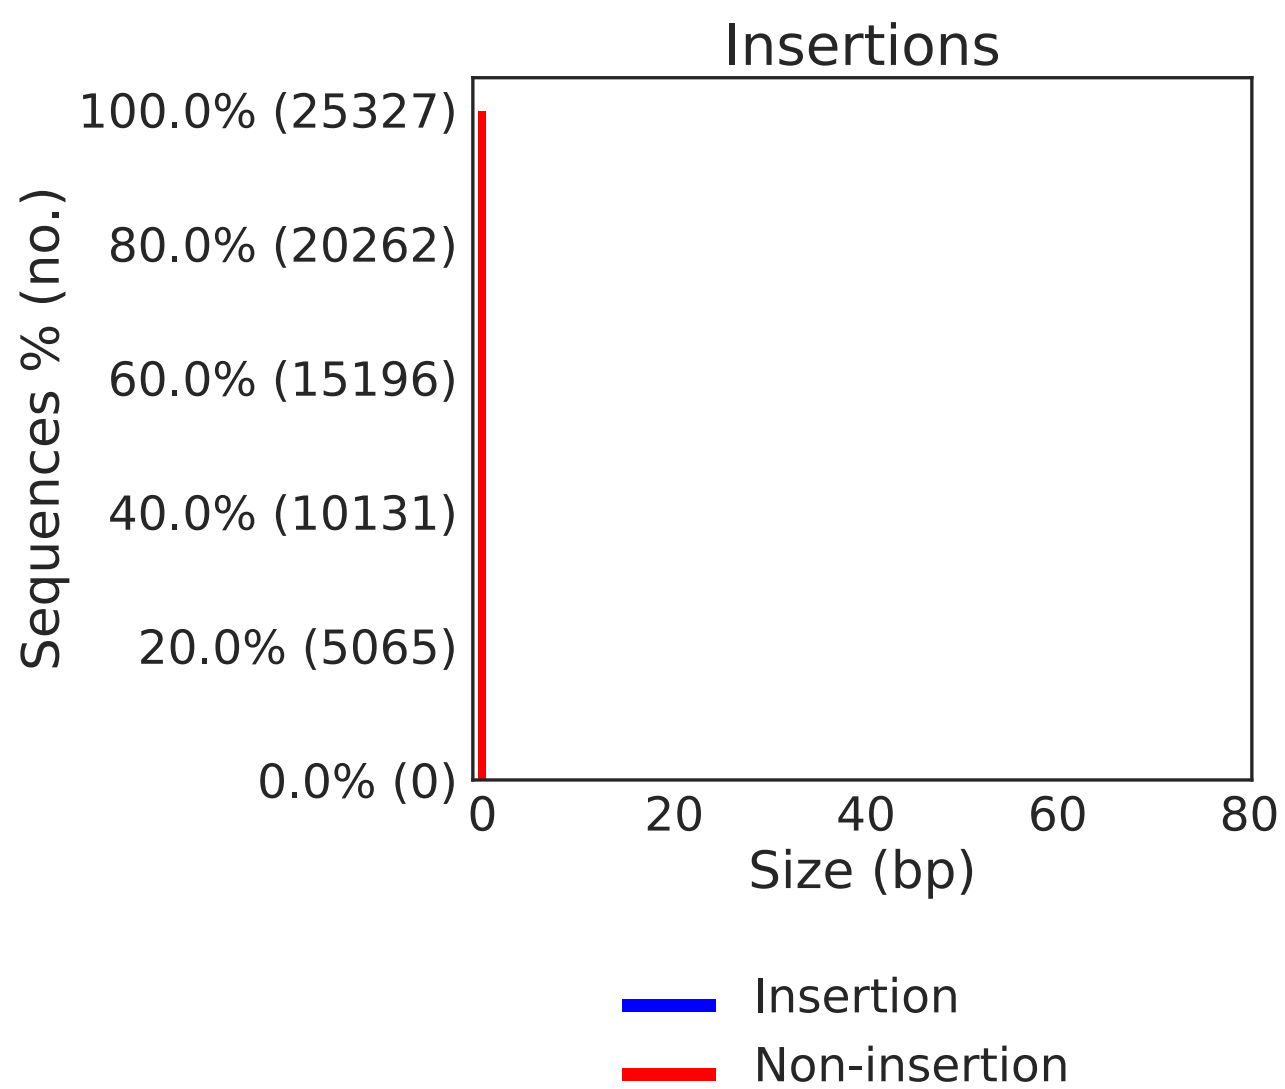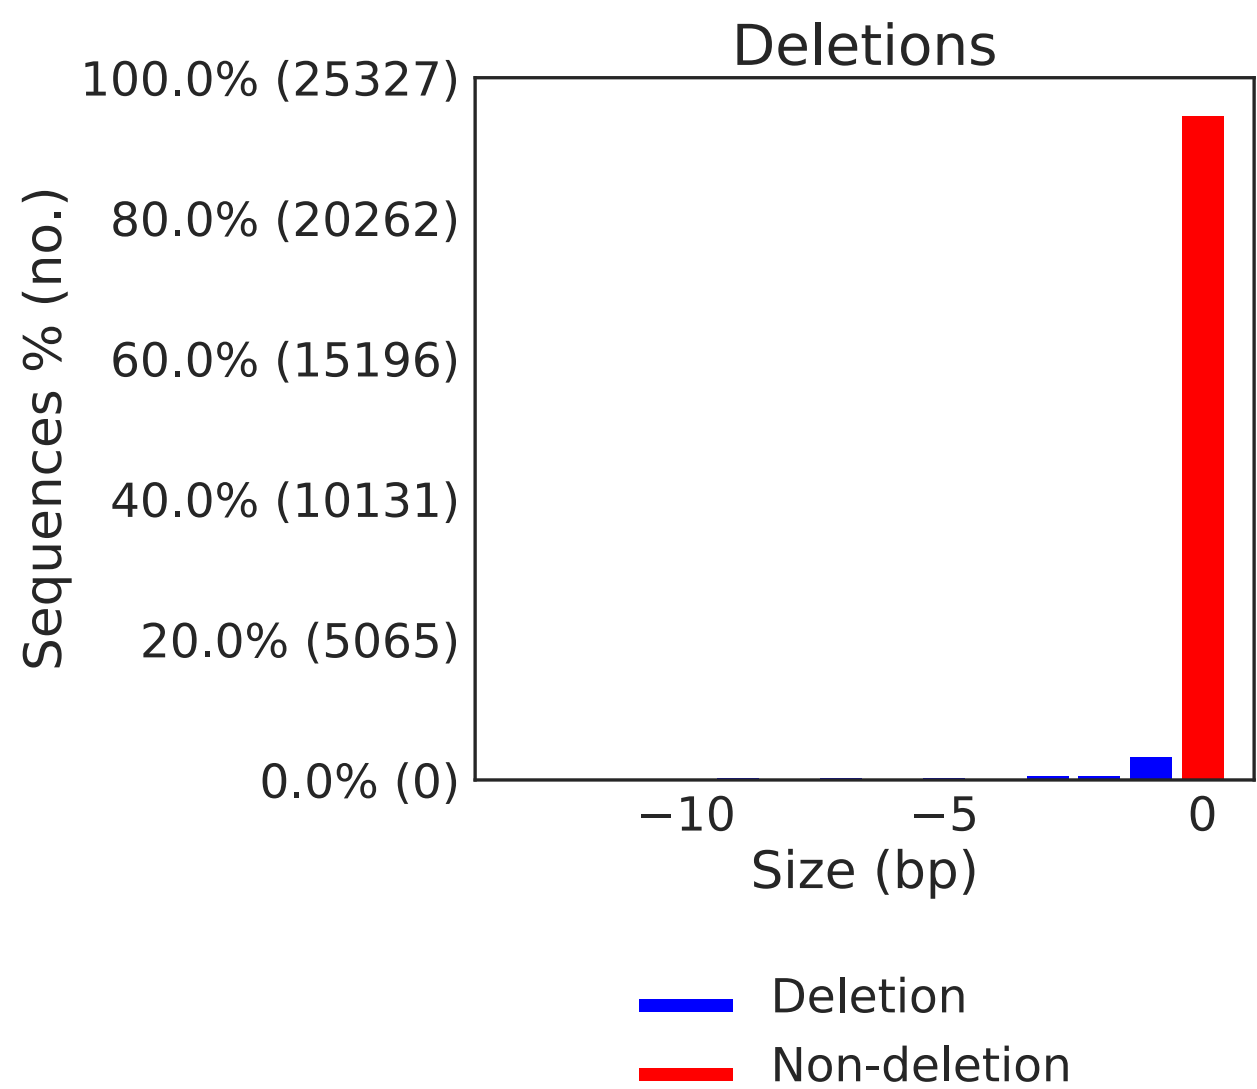

# *Tmc*<sup>Bth/WT</sup>, SaCas9<sup>KKH</sup> + gRNA 4.2, WT allele

**bold** Substitutions  
 Insertions  
 - Deletions  
 - - - Predicted cleavage position

G A A C A T G G T A A T G T C C C T C C T G G G G A A G T T C T G T C C C A C C Reference  
 G A A C A T G G T A A T G T C C C T C C **T** G G G G A **T** G T T C T G T C C C A C C 98.20% (24996 reads)

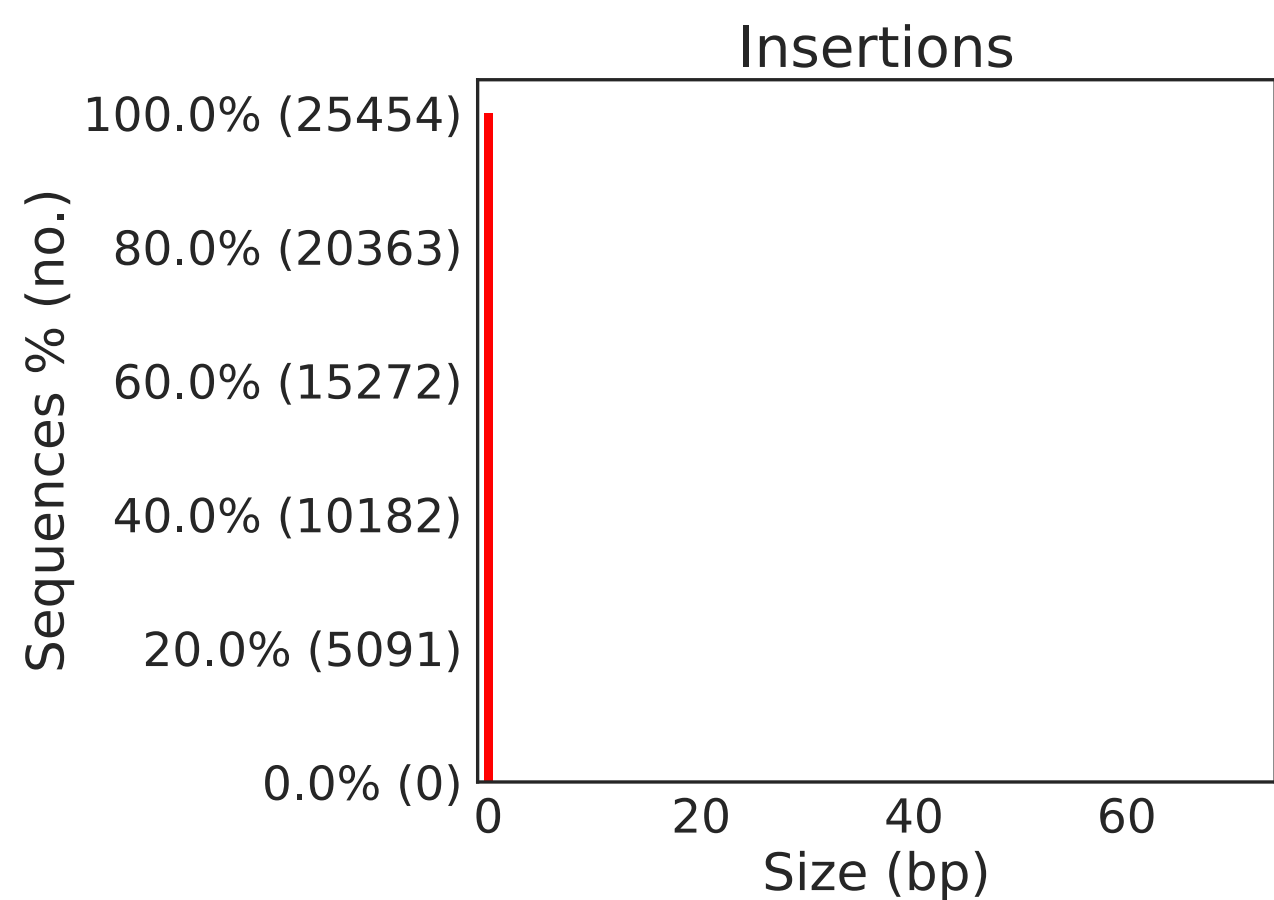

— Insertion  
— Non-insertion

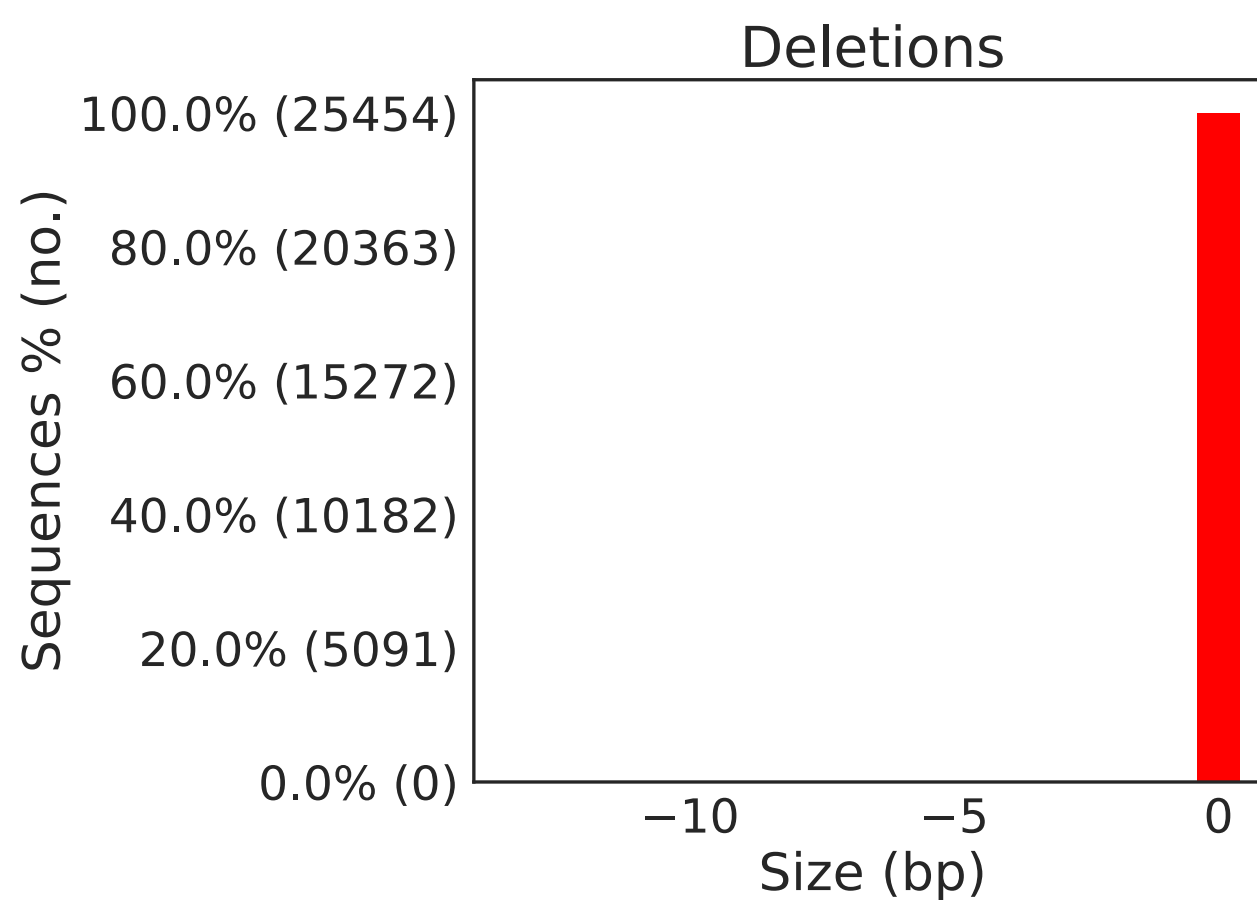

— Deletion  
— Non-deletion

# *Tmc*<sup>Bth/WT</sup>, SaCas9<sup>KKH</sup> + gRNA 4.3, Bth allele

**bold** Substitutions  
 Insertions  
 - Deletions  
 - - - Predicted cleavage position

|   |   |   |   |   |   |   |   |   |   |   |   |   |   |   |   |   |   |   |   |          |   |   |   |   |   |   |   |   |   |   |   |   |   |   |   |   |   |   |   |                      |
|---|---|---|---|---|---|---|---|---|---|---|---|---|---|---|---|---|---|---|---|----------|---|---|---|---|---|---|---|---|---|---|---|---|---|---|---|---|---|---|---|----------------------|
| G | A | A | C | A | T | G | G | T | A | A | T | G | T | C | C | C | T | C | C | T        | G | G | G | G | A | A | G | T | T | C | T | G | T | C | C | C | A | C | C | Reference            |
| G | A | A | C | A | T | G | G | T | A | A | T | G | T | C | C | C | T | C | C | <b>T</b> | G | G | G | G | A | A | G | T | T | C | T | G | T | C | C | C | A | C | C | 90.24% (18328 reads) |
| G | A | A | C | A | T | G | G | T | A | A | T | G | T | C | C | C | T | C | C | -        | G | G | G | G | A | A | G | T | T | C | T | G | T | C | C | C | A | C | C | 3.32% (674 reads)    |
| G | A | A | C | A | T | G | G | T | A | A | T | G | T | C | C | C | T | C | - | T        | G | G | G | G | A | A | G | T | T | C | T | G | T | C | C | C | A | C | C | 0.62% (125 reads)    |
| G | A | A | C | A | T | G | G | T | A | A | T | G | T | C | C | C | T | - | C | T        | G | G | G | G | A | A | G | T | T | C | T | G | T | C | C | C | A | C | C | 0.51% (104 reads)    |
| G | A | A | C | A | T | G | G | T | A | A | T | G | T | C | C | C | T | - | - | -        | G | G | G | G | A | A | G | T | T | C | T | G | T | C | C | C | A | C | C | 0.51% (103 reads)    |
| G | A | A | C | A | T | G | G | T | A | A | T | G | T | C | - | - | - | C | C | T        | G | G | G | G | A | A | G | T | T | C | T | G | T | C | C | C | A | C | C | 0.46% (93 reads)     |
| G | A | A | C | A | T | G | G | T | A | A | T | G | T | C | C | C | T | - | - | T        | G | G | G | G | A | A | G | T | T | C | T | G | T | C | C | C | A | C | C | 0.40% (81 reads)     |
| G | A | A | C | A | T | G | G | T | A | A | T | G | T | C | C | C | T | C | C | -        | - | G | G | G | A | A | G | T | T | C | T | G | T | C | C | C | A | C | C | 0.22% (45 reads)     |

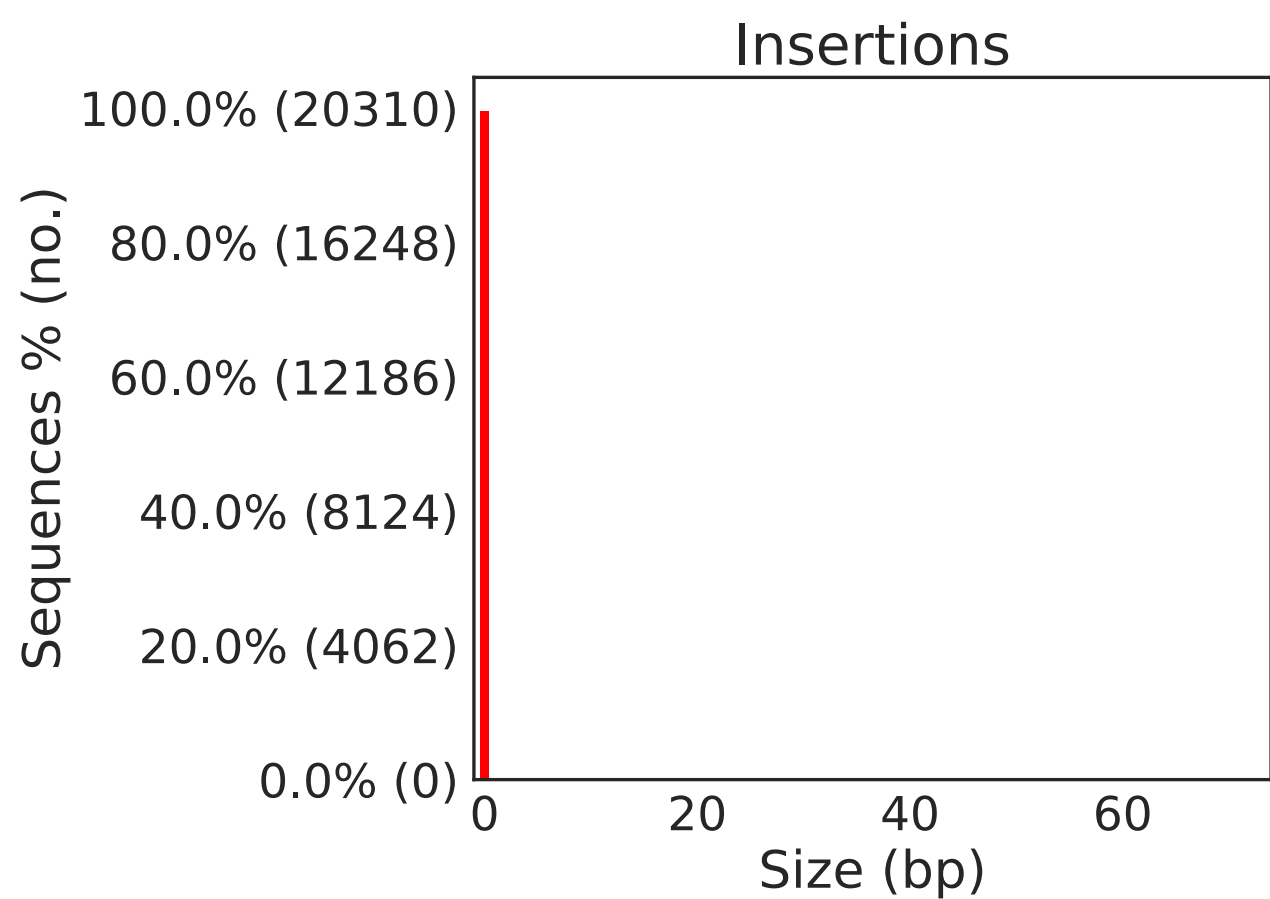

Insertion  
 Non-insertion

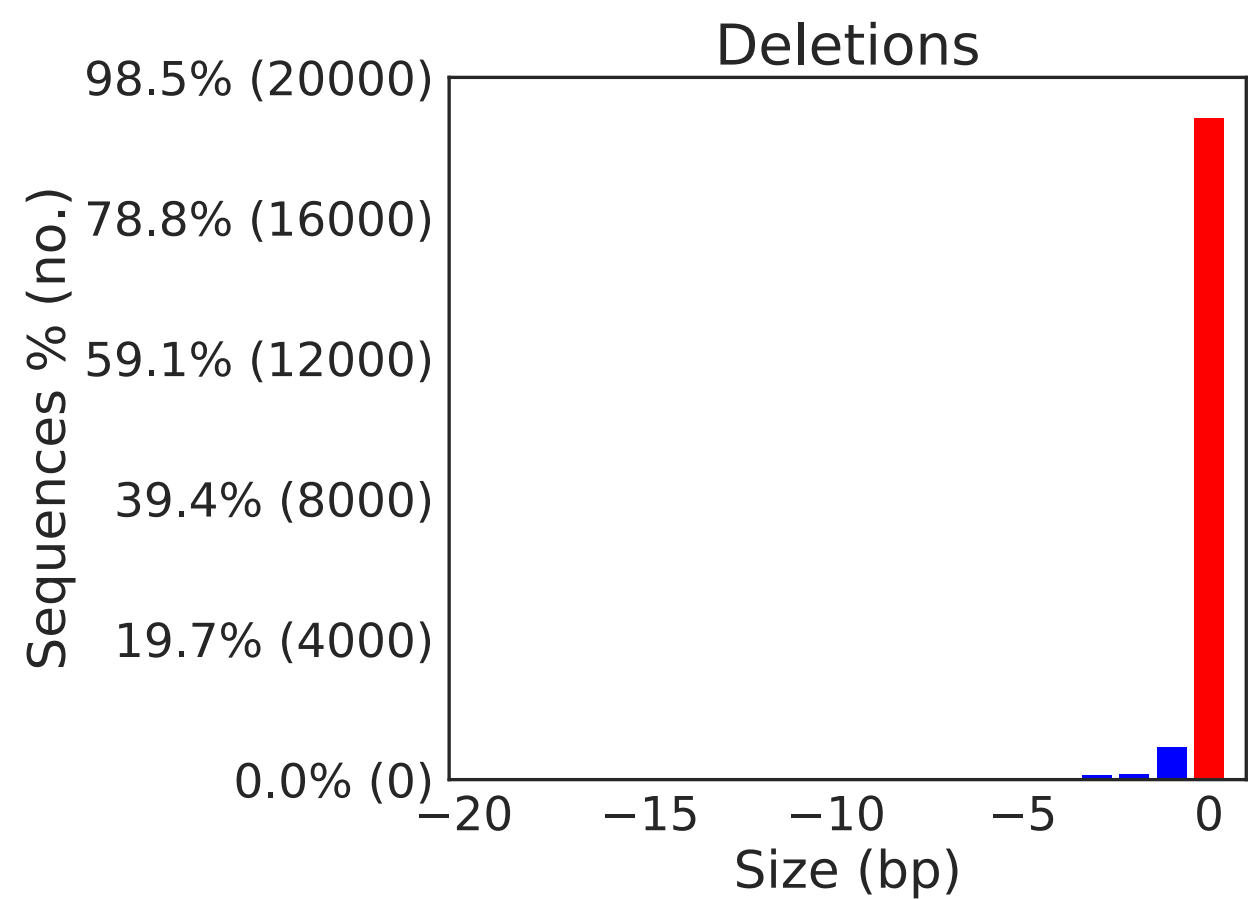

Deletion  
 Non-deletion

# *Tmc*<sup>Bth/WT</sup>, SaCas9<sup>KKH</sup> + gRNA 4.3, WT allele

**bold** Substitutions  
 Insertions  
 - Deletions  
 - - - Predicted cleavage position

G A A C A T G G T A A T G T C C C T C C T G G G G A A G T T C T G T C C C A C C Reference  
 G A A C A T G G T A A T G T C C C T C C **T** G G G G A **T** G T T C T G T C C C A C C 98.14% (20950 reads)

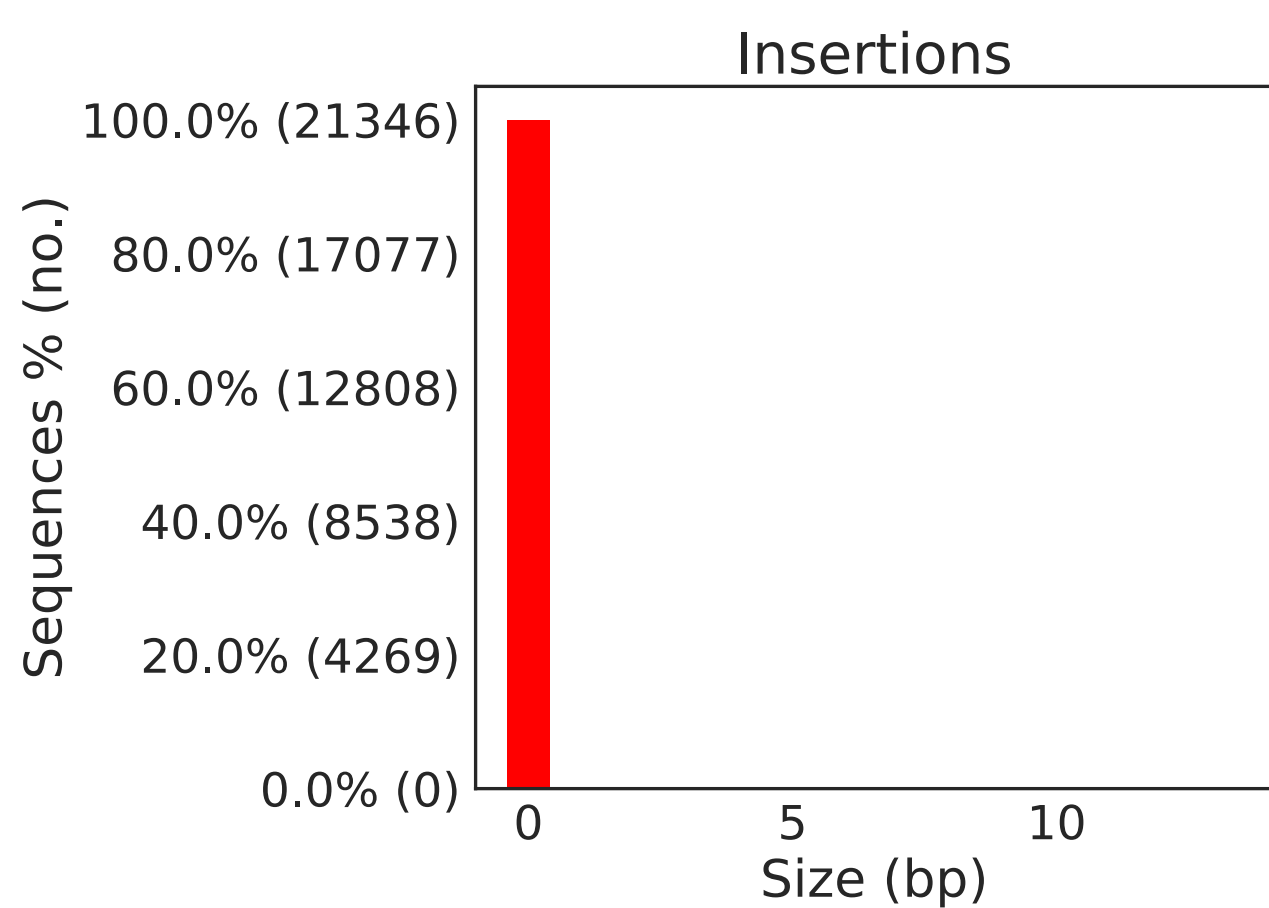

— Insertion  
— Non-insertion

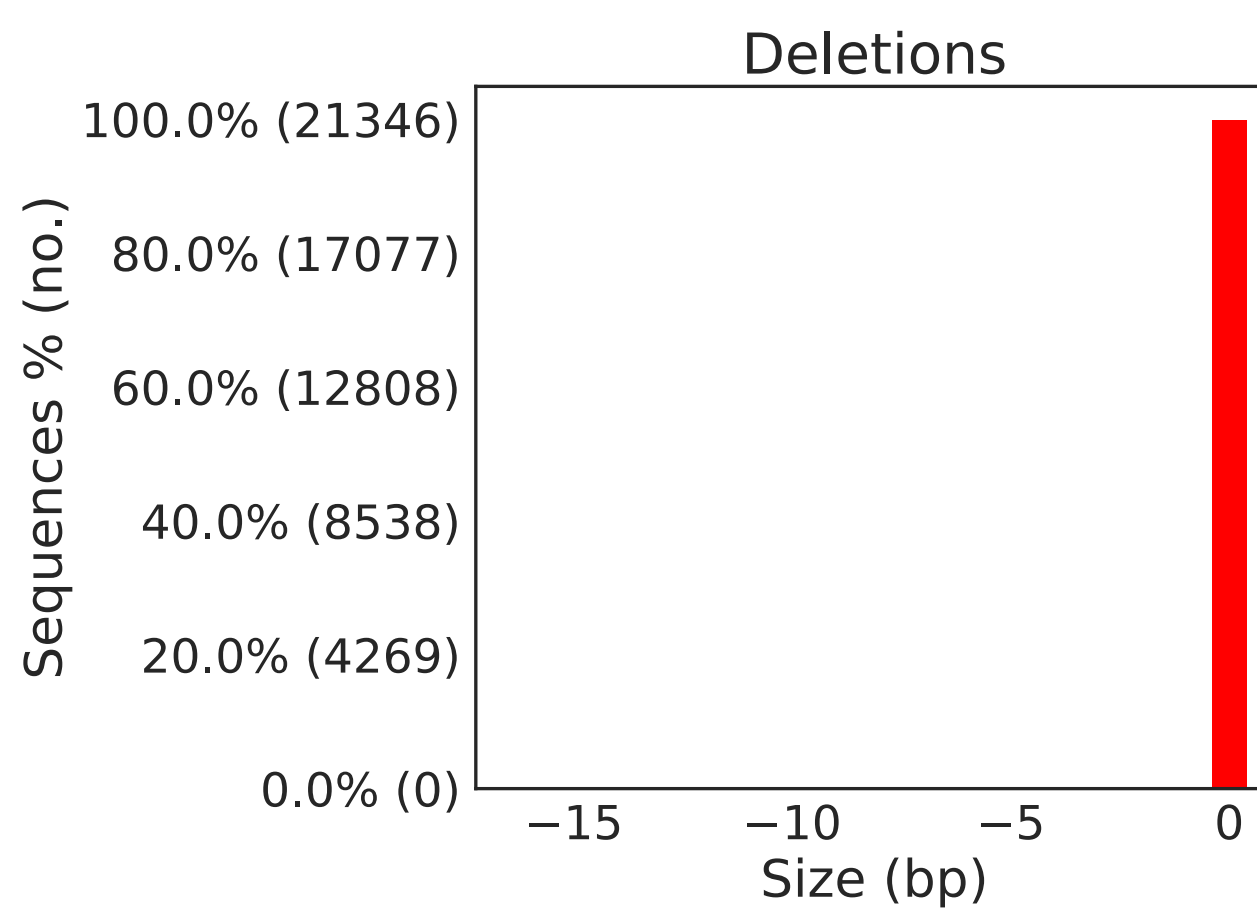

— Deletion  
— Non-deletion



# *Tmc*<sup>WT/WT</sup>, SpCas9 only

**bold** Substitutions  
 Insertions  
 - Deletions  
 - - - Predicted cleavage position

|   |   |   |   |          |   |   |   |   |   |   |   |   |   |   |   |   |   |   |   |   |   |   |          |   |   |   |   |   |   |   |   |   |   |   |   |   |   |   |   |           |                      |
|---|---|---|---|----------|---|---|---|---|---|---|---|---|---|---|---|---|---|---|---|---|---|---|----------|---|---|---|---|---|---|---|---|---|---|---|---|---|---|---|---|-----------|----------------------|
| A | T | G | G | T        | A | A | T | G | T | C | C | C | T | C | C | T | G | G | G | G | A | A | G        | T | T | C | T | G | T | C | C | C | A | C | C | C | T | G | T | Reference |                      |
| A | T | G | G | T        | A | A | T | G | T | C | C | C | T | C | C | T | G | G | G | G | G | A | T        | G | T | T | C | T | G | T | C | C | C | A | C | C | C | T | G | T         | 96.81% (15771 reads) |
| A | T | G | G | <b>A</b> | A | A | T | G | T | C | C | C | T | C | C | T | G | G | G | G | G | A | <b>T</b> | G | T | T | C | T | G | T | C | C | C | A | C | C | C | T | G | T         | 0.48% (78 reads)     |
| A | T | G | G | <b>C</b> | A | A | T | G | T | C | C | C | T | C | C | T | G | G | G | G | G | A | <b>T</b> | G | T | T | C | T | G | T | C | C | C | A | C | C | C | T | G | T         | 0.38% (62 reads)     |
| A | T | G | G | <b>G</b> | A | A | T | G | T | C | C | C | T | C | C | T | G | G | G | G | G | A | <b>T</b> | G | T | T | C | T | G | T | C | C | C | A | C | C | C | T | G | T         | 0.36% (58 reads)     |

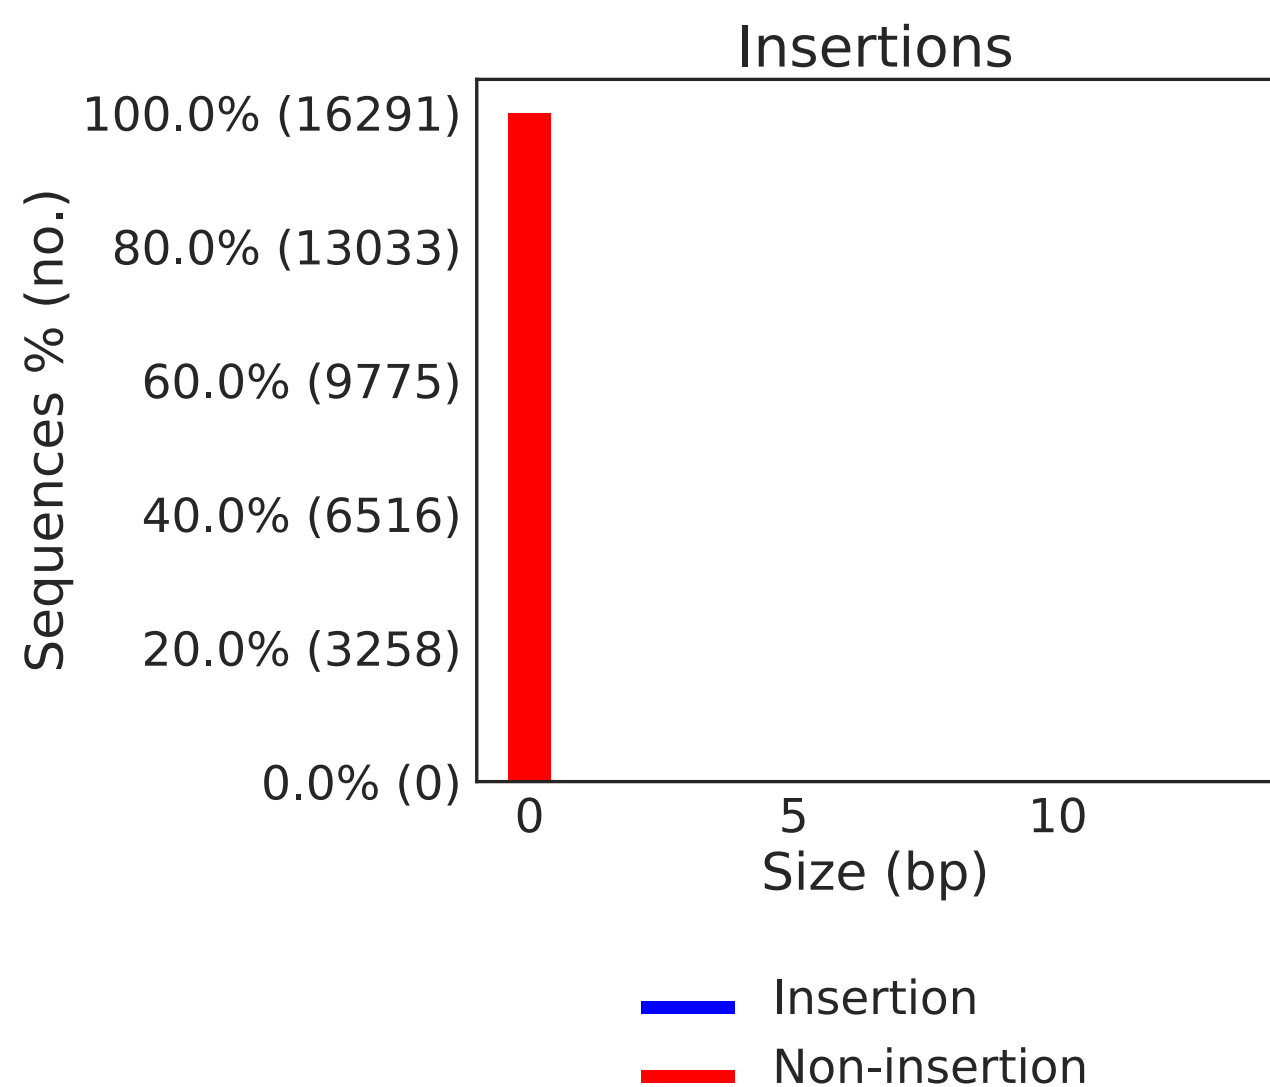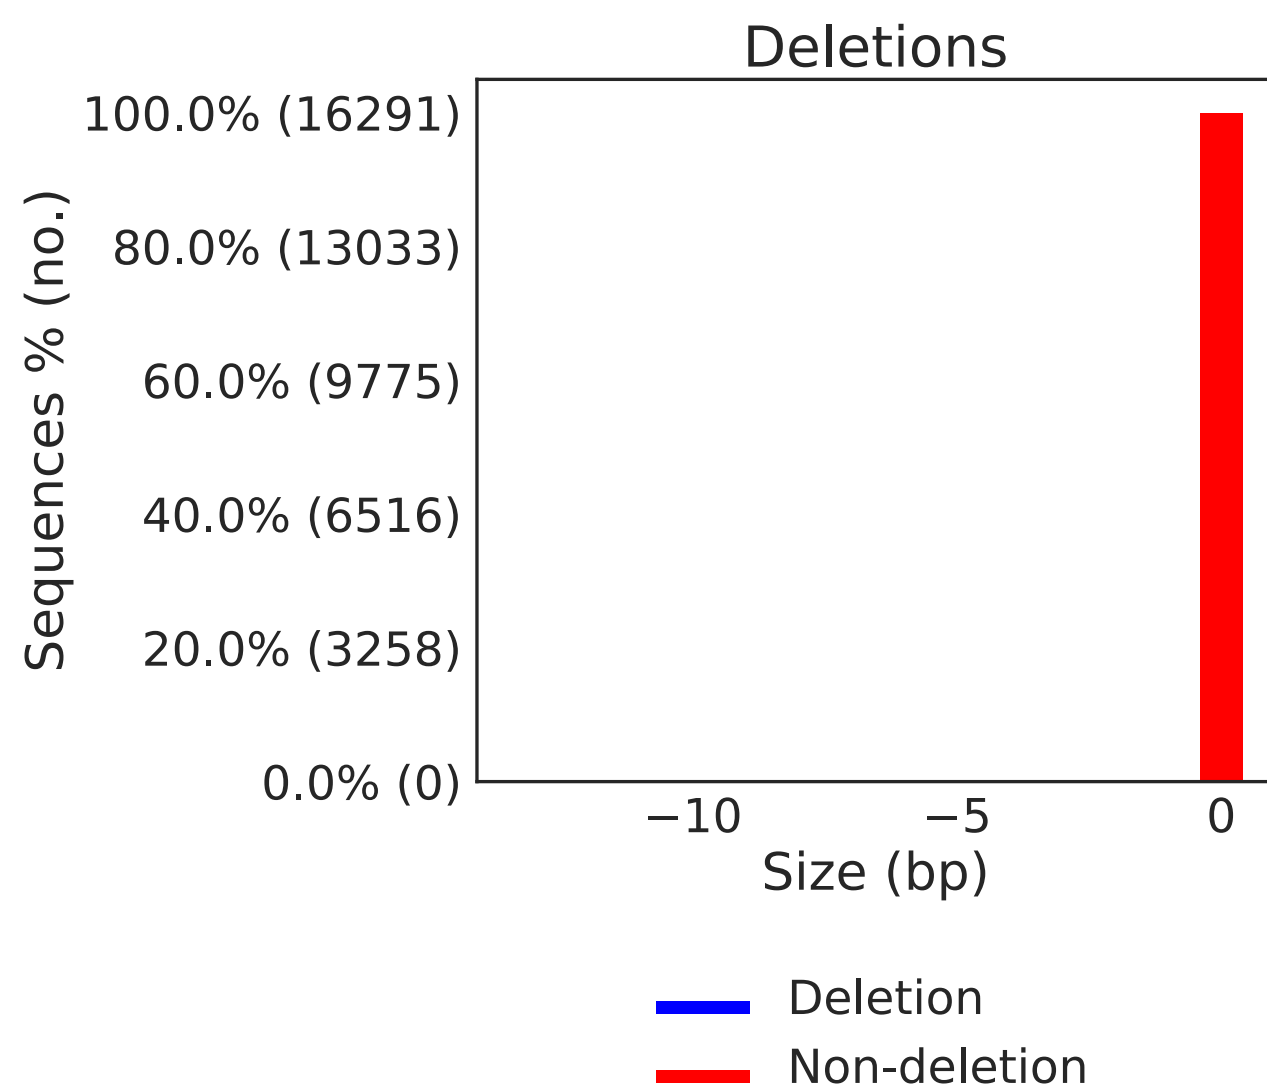

# *Tmc*<sup>WT/WT</sup>, SpCas9 + gRNA 1.1

**bold** Substitutions  
 Insertions  
 - Deletions  
 - - - Predicted cleavage position

|   |   |   |   |   |   |   |   |   |   |   |   |   |   |   |   |   |   |   |   |          |          |          |   |   |   |   |   |   |   |   |   |   |   |   |   |   |   |   |   |                      |   |                   |
|---|---|---|---|---|---|---|---|---|---|---|---|---|---|---|---|---|---|---|---|----------|----------|----------|---|---|---|---|---|---|---|---|---|---|---|---|---|---|---|---|---|----------------------|---|-------------------|
| A | T | G | G | T | A | A | T | G | T | C | C | C | T | C | C | T | G | G | G | G        | A        | A        | G | T | T | C | T | G | T | C | C | C | A | C | C | C | T | G | T | Reference            |   |                   |
| A | T | G | G | T | A | A | T | G | T | C | C | C | T | C | C | T | G | G | G | <b>G</b> | <b>A</b> | <b>T</b> | G | T | T | C | T | G | T | C | C | C | A | C | C | C | T | G | T | 86.61% (43129 reads) |   |                   |
| A | T | G | G | T | A | A | T | G | T | C | C | C | T | C | C | T | - | G | G | G        | <b>A</b> | <b>T</b> | G | T | T | C | T | G | T | C | C | C | A | C | C | C | T | G | T | 2.74% (1363 reads)   |   |                   |
| A | T | G | G | T | A | A | T | G | T | C | C | C | T | C | C | T | G | G | G | -        | <b>A</b> | <b>T</b> | G | T | T | C | T | G | T | C | C | C | A | C | C | C | T | G | T | 2.73% (1357 reads)   |   |                   |
| A | T | G | G | T | A | A | T | G | T | C | C | C | T | C | C | T | G | G | G | <b>T</b> | -        | -        | G | T | T | C | T | G | T | C | C | C | A | C | C | C | T | G | T | 0.41% (206 reads)    |   |                   |
| A | T | G | G | T | A | A | T | G | T | C | C | C | T | C | C | T | G | G | G | -        | -        | <b>T</b> | G | T | T | C | T | G | T | C | C | C | A | C | C | C | T | G | T | 0.37% (185 reads)    |   |                   |
| A | T | G | G | T | A | A | - | - | - | - | - | - | - | - | - | - | - | - | - | -        | -        | -        | - | - | - | - | - | - | T | G | T | C | C | C | A | C | C | C | T | G                    | T | 0.20% (102 reads) |
| A | T | G | G | T | A | A | T | G | T | C | C | C | T | C | C | T | G | G | G | -        | -        | -        | G | T | T | C | T | G | T | C | C | C | A | C | C | C | T | G | T | 0.20% (101 reads)    |   |                   |
| A | T | G | G | T | A | A | T | G | T | C | C | C | T | C | C | T | G | G | G | <b>G</b> | -        | -        | - | T | T | C | T | G | T | C | C | C | A | C | C | C | T | G | T | 0.20% (101 reads)    |   |                   |
| A | T | G | G | T | A | A | T | G | T | C | C | C | T | C | C | T | G | G | G | <b>G</b> | -        | -        | - | T | T | C | T | G | T | C | C | C | A | C | C | C | T | G | T | 0.20% (100 reads)    |   |                   |

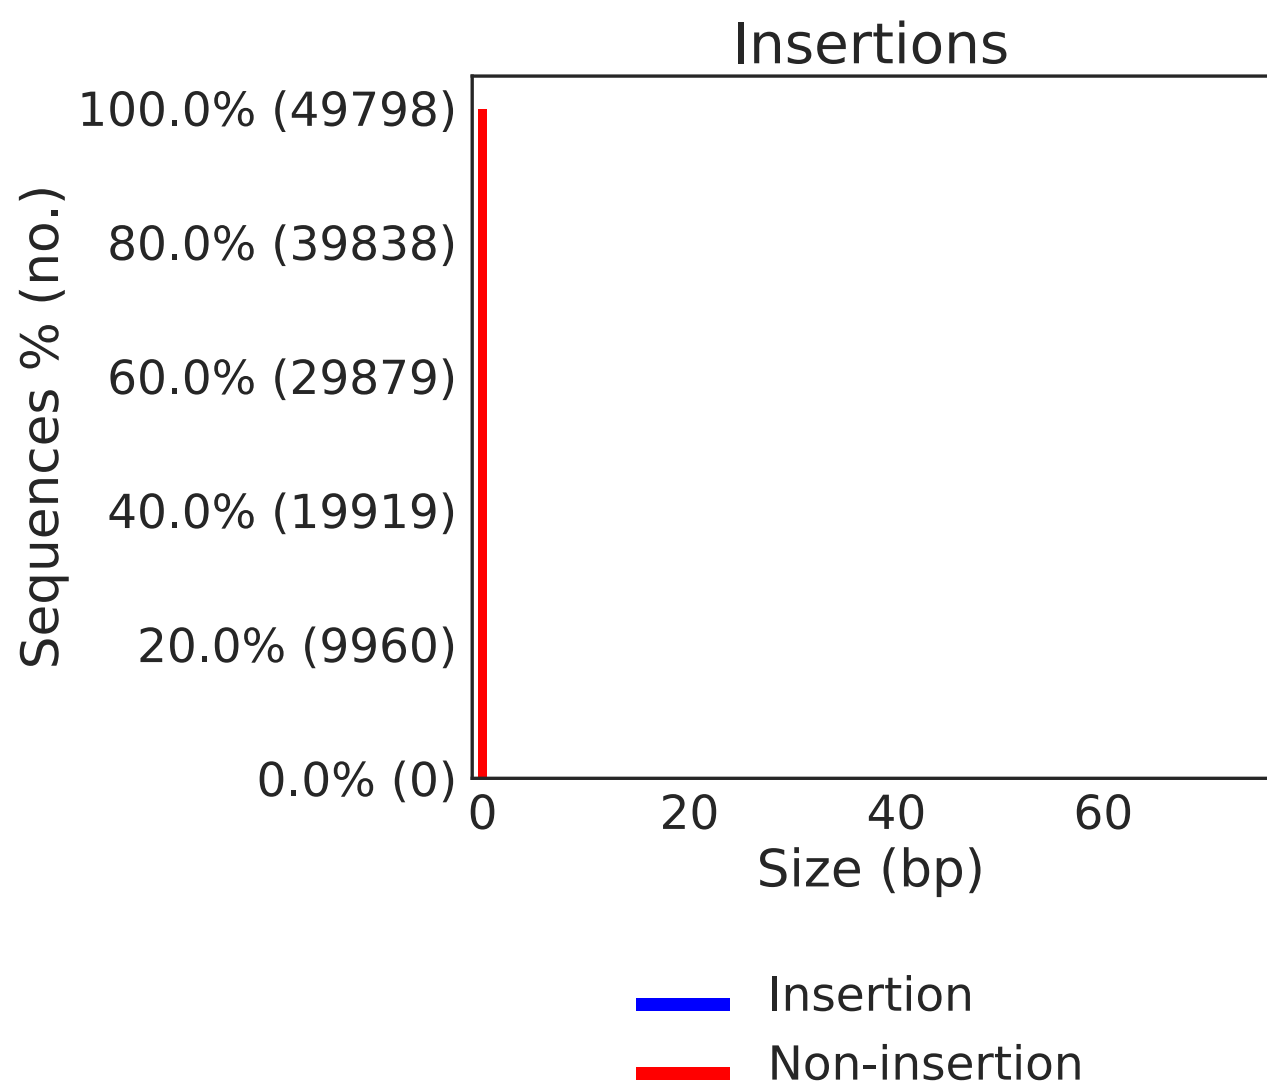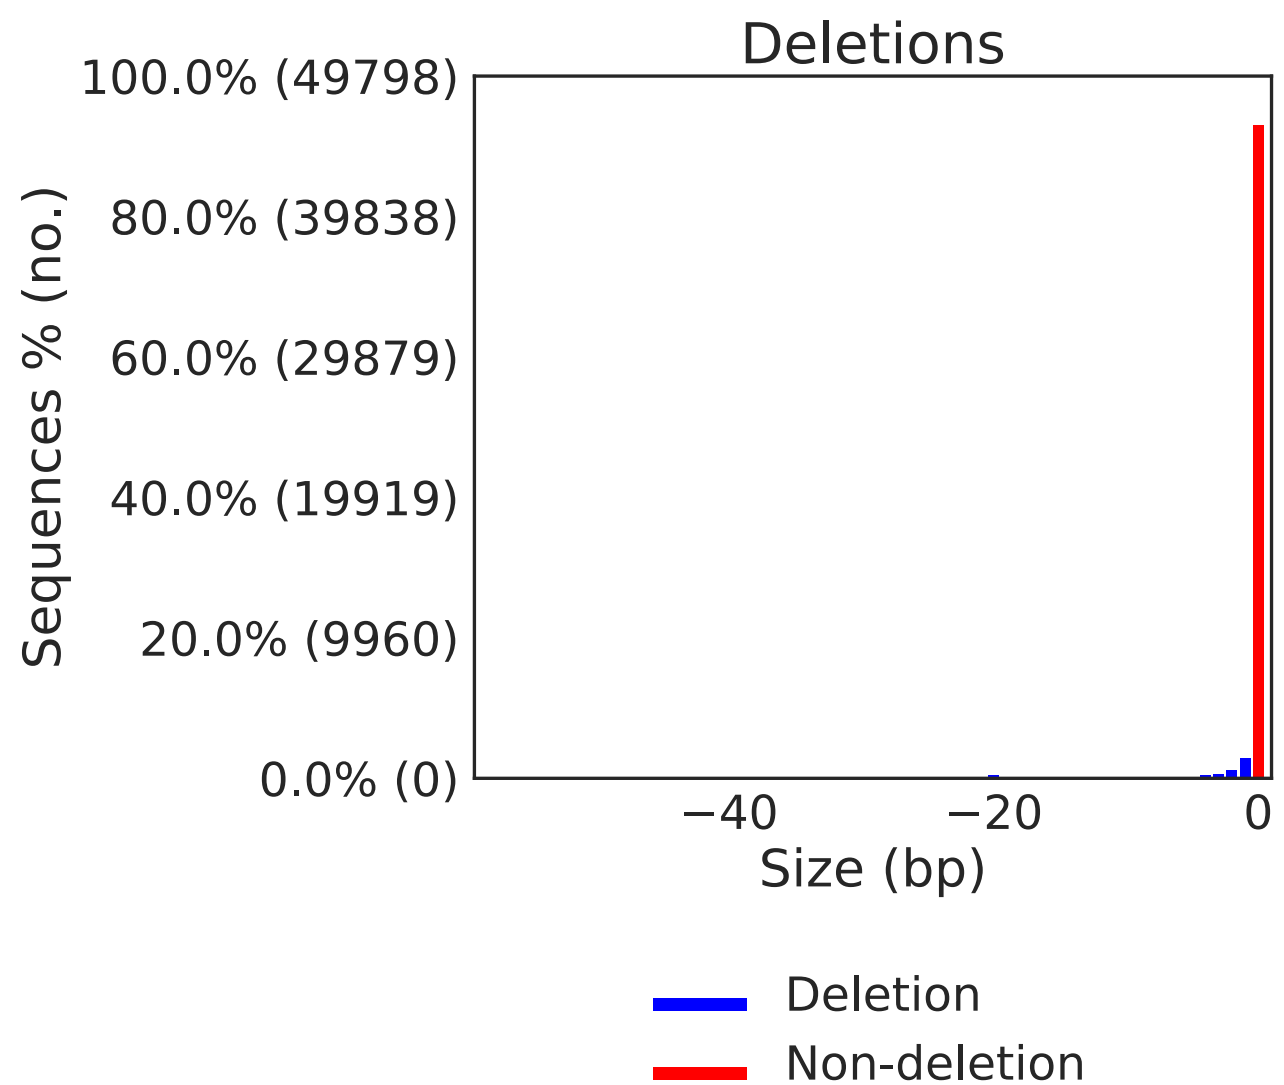

# *Tmc*<sup>WT/WT</sup>, SpCas9 + gRNA 2.1

**bold** Substitutions  
 Insertions  
 - Deletions  
 - - - Predicted cleavage position

|   |   |   |   |   |   |   |   |   |   |   |   |   |   |   |   |   |   |   |   |   |   |   |   |   |          |   |   |   |   |   |   |   |   |   |   |   |   |   |   |                      |
|---|---|---|---|---|---|---|---|---|---|---|---|---|---|---|---|---|---|---|---|---|---|---|---|---|----------|---|---|---|---|---|---|---|---|---|---|---|---|---|---|----------------------|
| A | A | C | A | T | G | G | T | A | A | T | G | T | C | C | C | T | C | C | T | G | G | G | G | A | A        | G | T | T | C | T | G | T | C | C | C | A | C | C | C | Reference            |
| A | A | C | A | T | G | G | T | A | A | T | G | T | C | C | C | T | C | C | T | G | G | G | G | A | <b>T</b> | G | T | T | C | T | G | T | C | C | C | A | C | C | C | 92.58% (44449 reads) |
| A | A | C | A | T | G | G | T | A | A | T | G | T | C | C | C | T | C | C | T | G | G | G | G | A | <b>T</b> | G | T | T | C | T | G | T | C | C | C | A | C | C | C | 0.80% (383 reads)    |
| A | A | C | A | T | G | G | T | A | A | T | G | T | C | C | C | T | C | C | T | G | G | G | G | A | <b>T</b> | G | T | T | C | T | G | T | C | C | C | A | C | C | C | 0.77% (372 reads)    |
| A | A | C | A | T | G | G | T | A | A | T | G | T | C | C | C | T | C | C | T | G | G | G | G | A | <b>T</b> | G | T | T | C | T | G | T | C | C | C | A | C | C | C | 0.77% (370 reads)    |

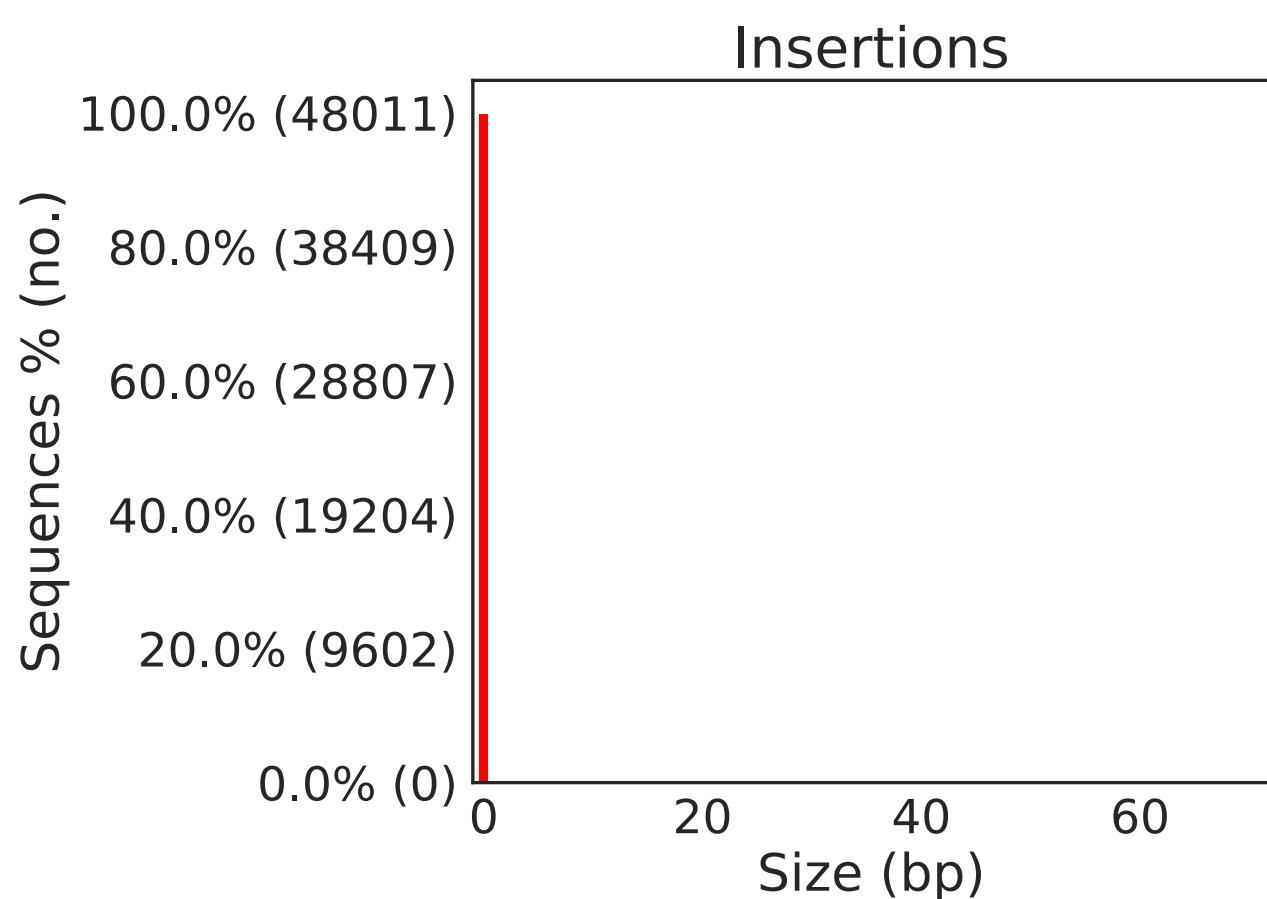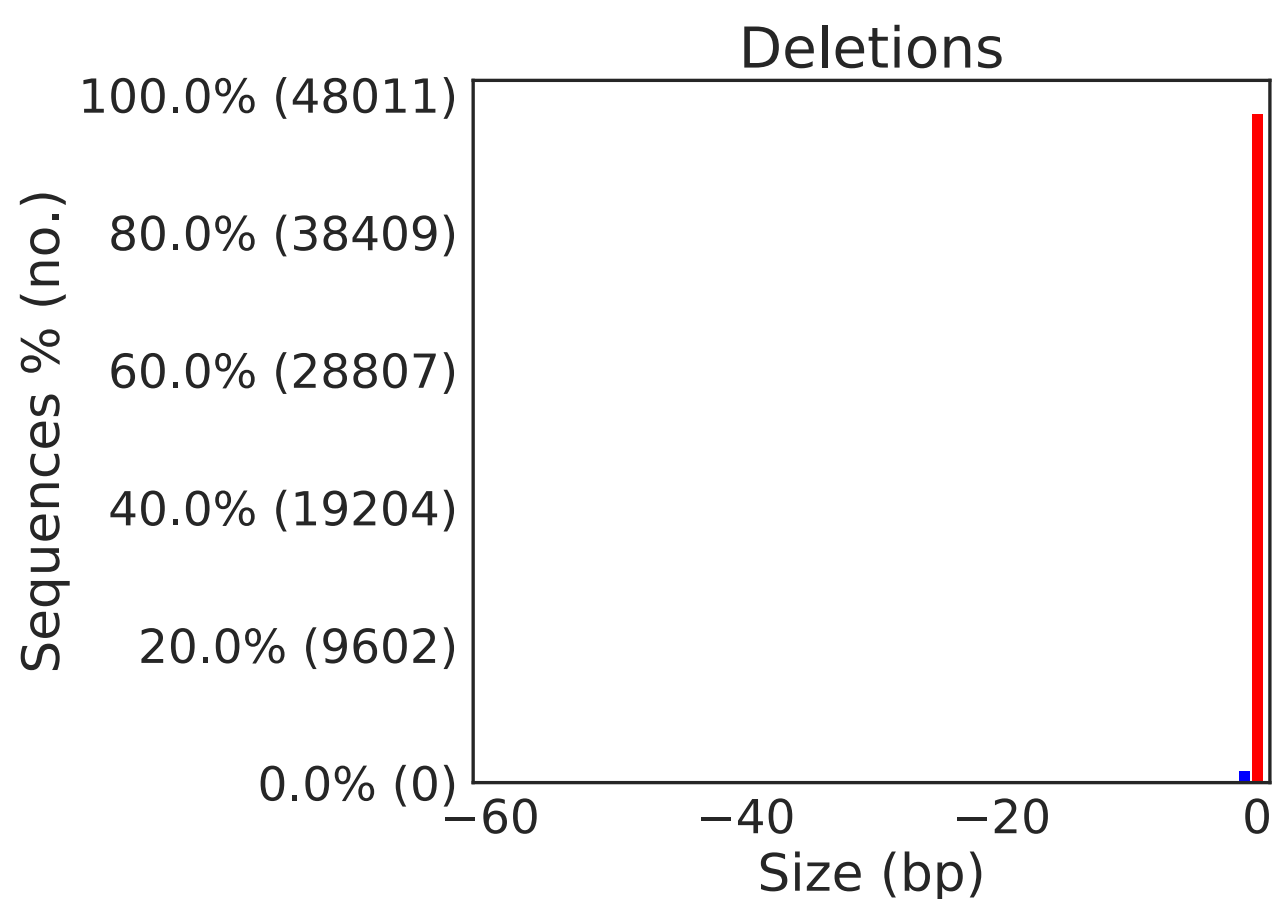

— Insertion  
 — Non-insertion

— Deletion  
 — Non-deletion

# *Tmc*<sup>WT/WT</sup>, SpCas9 + gRNA 2.4

**bold** Substitutions  
 Insertions  
 - Deletions  
 - - - Predicted cleavage position

|   |   |   |   |   |   |   |   |   |   |   |   |   |   |   |   |   |   |   |   |   |   |   |   |   |          |   |   |   |   |   |   |   |   |   |   |   |   |   |   |                      |
|---|---|---|---|---|---|---|---|---|---|---|---|---|---|---|---|---|---|---|---|---|---|---|---|---|----------|---|---|---|---|---|---|---|---|---|---|---|---|---|---|----------------------|
| A | A | C | A | T | G | G | T | A | A | T | G | T | C | C | C | T | C | C | T | G | G | G | G | A | A        | G | T | T | C | T | G | T | C | C | C | A | C | C | C | Reference            |
| A | A | C | A | T | G | G | T | A | A | T | G | T | C | C | C | T | C | C | T | G | G | G | G | A | <b>T</b> | G | T | T | C | T | G | T | C | C | C | A | C | C | C | 93.02% (45443 reads) |
| A | A | C | A | T | G | G | T | A | A | T | G | T | C | C | C | T | C | C | T | G | G | G | - | A | <b>T</b> | G | T | T | C | T | G | T | C | C | C | A | C | C | C | 0.64% (311 reads)    |
| A | A | C | A | T | G | G | T | A | A | T | G | T | C | C | C | T | C | C | T | - | G | G | G | A | <b>T</b> | G | T | T | C | T | G | T | C | C | C | A | C | C | C | 0.61% (297 reads)    |
| A | A | C | A | T | G | G | T | A | A | T | G | T | C | C | C | T | C | C | - | G | G | G | G | A | <b>T</b> | G | T | T | C | T | G | T | C | C | C | A | C | C | C | 0.44% (215 reads)    |

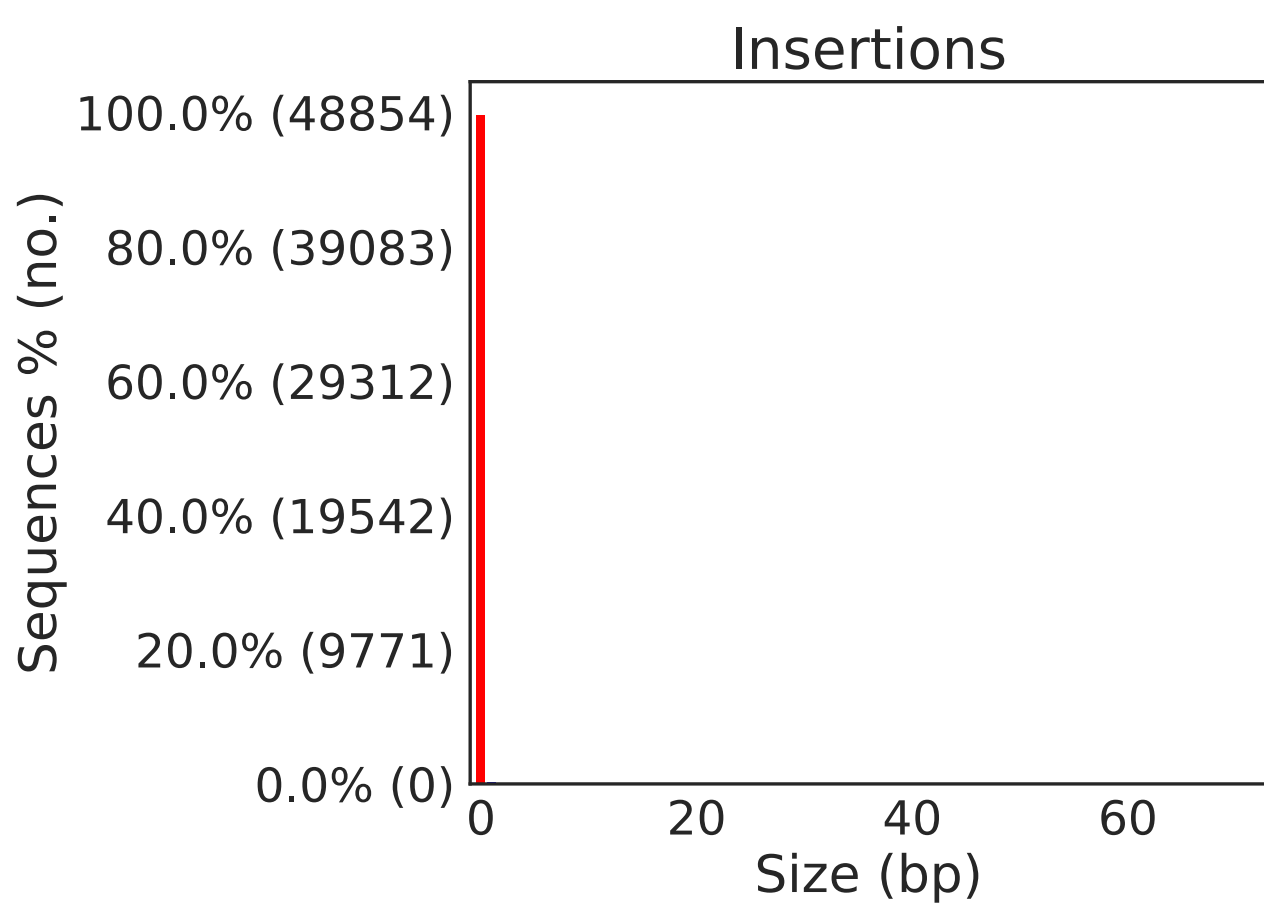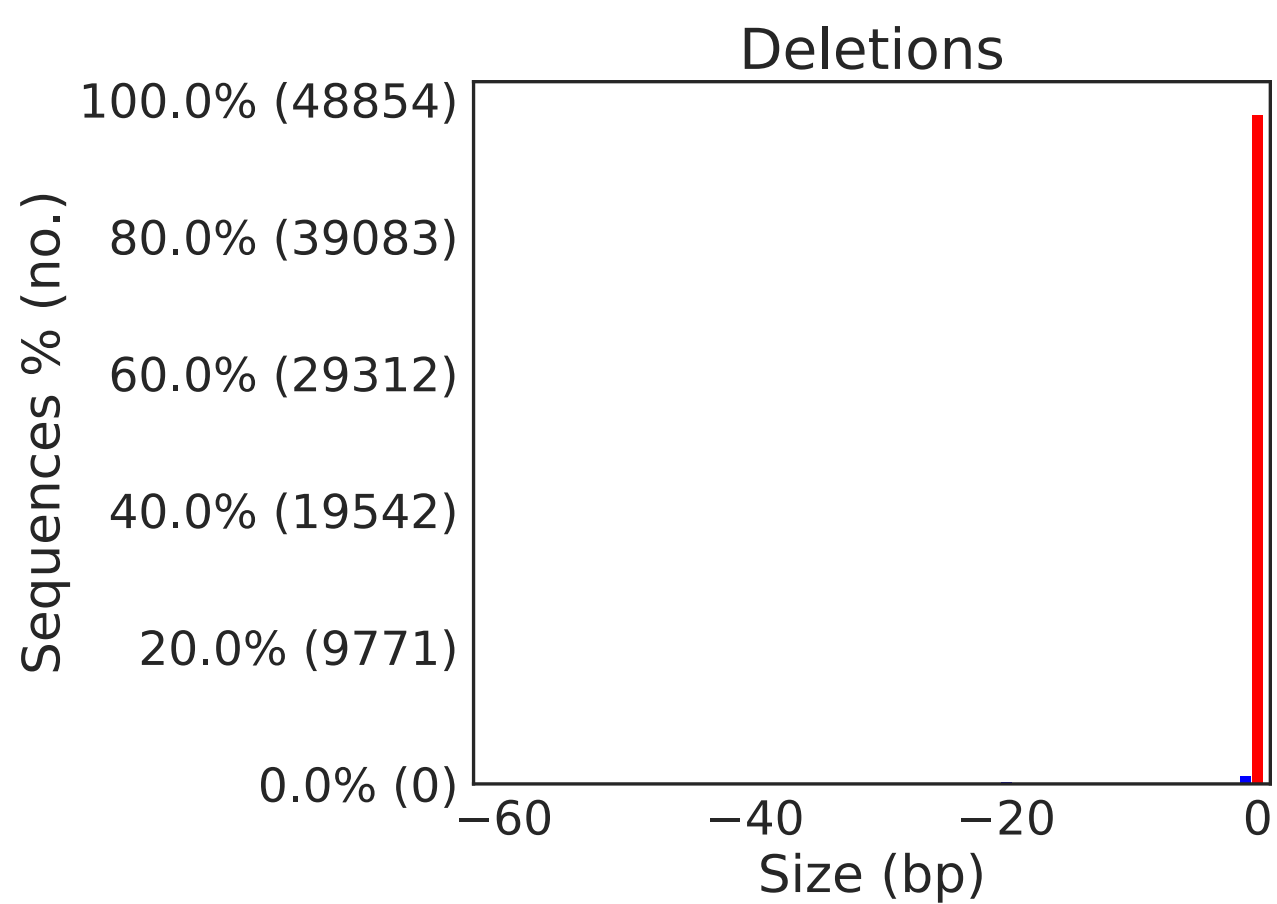

— Insertion  
— Non-insertion

— Deletion  
— Non-deletion

# *Tmc*<sup>WT/WT</sup>, eSpCas9 + gRNA 1.1

**bold** Substitutions  
 Insertions  
 - Deletions  
 - - - Predicted cleavage position

|   |   |   |   |   |   |   |   |   |   |   |   |   |   |   |   |   |   |   |   |          |          |          |          |   |   |   |   |   |   |   |   |   |   |   |   |   |   |   |   |                      |                   |
|---|---|---|---|---|---|---|---|---|---|---|---|---|---|---|---|---|---|---|---|----------|----------|----------|----------|---|---|---|---|---|---|---|---|---|---|---|---|---|---|---|---|----------------------|-------------------|
| A | T | G | G | T | A | A | T | G | T | C | C | C | T | C | C | T | G | G | G | G        | A        | A        | G        | T | T | C | T | G | T | C | C | C | A | C | C | C | T | G | T | Reference            |                   |
| A | T | G | G | T | A | A | T | G | T | C | C | C | T | C | C | T | G | G | G | <b>G</b> | A        | <b>T</b> | G        | T | T | C | T | G | T | C | C | C | A | C | C | C | T | G | T | 90.80% (24374 reads) |                   |
| A | T | G | G | T | A | A | T | G | T | C | C | C | T | C | C | T | - | G | G | G        | <b>G</b> | A        | <b>T</b> | G | T | T | C | T | G | T | C | C | C | A | C | C | C | T | G | T                    | 1.56% (419 reads) |
| A | T | G | G | T | A | A | T | G | T | C | C | C | T | C | C | T | G | G | G | -        | A        | <b>T</b> | G        | T | T | C | T | G | T | C | C | C | A | C | C | C | T | G | T | 1.52% (408 reads)    |                   |
| A | T | G | G | T | A | A | T | G | T | C | C | C | T | C | C | T | G | G | G | <b>T</b> | -        | -        | G        | T | T | C | T | G | T | C | C | C | A | C | C | C | T | G | T | 0.26% (70 reads)     |                   |
| A | T | G | G | T | A | A | T | G | T | C | C | C | T | C | C | T | G | G | G | -        | -        | <b>T</b> | G        | T | T | C | T | G | T | C | C | C | A | C | C | C | T | G | T | 0.25% (66 reads)     |                   |

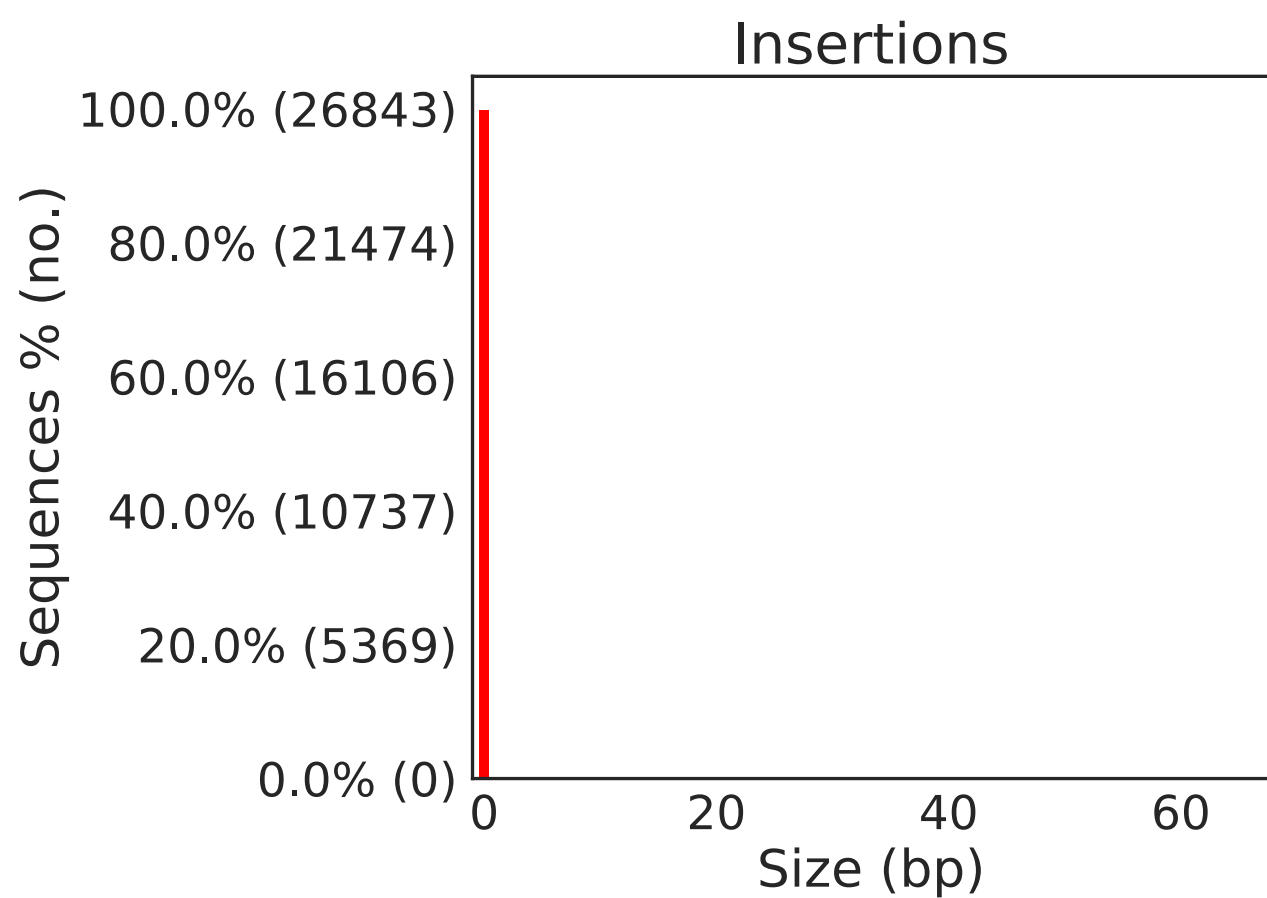

— Insertion  
— Non-insertion

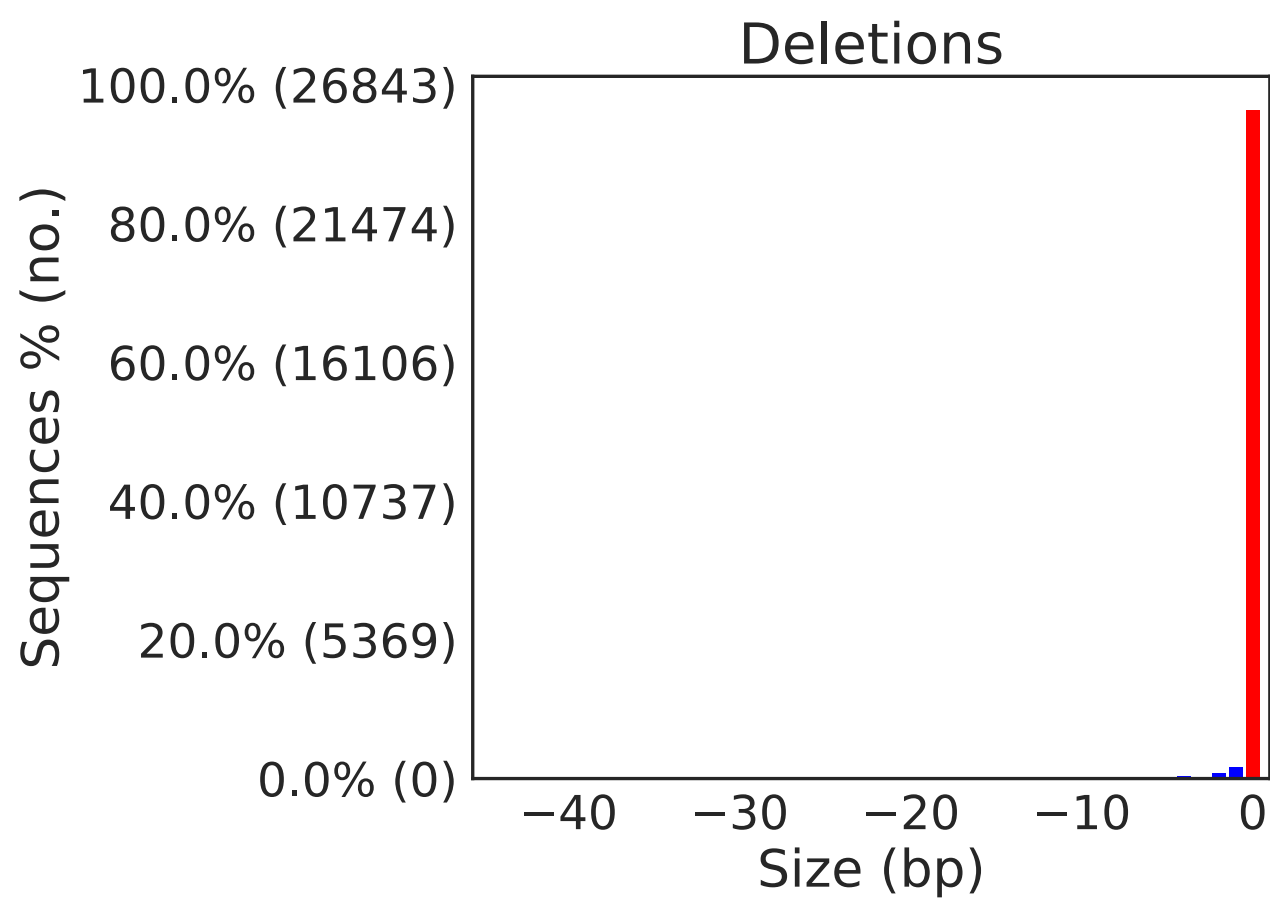

— Deletion  
— Non-deletion

# *Tmc*<sup>WT/WT</sup>, HypaCas9 + gRNA 1.1

**bold** Substitutions  
  Insertions  
 - Deletions  
 - - - Predicted cleavage position

|   |   |   |   |   |   |   |   |   |   |   |   |   |   |   |   |   |   |   |   |          |          |   |          |   |   |   |   |   |   |   |   |   |   |   |   |   |   |   |   |           |                      |
|---|---|---|---|---|---|---|---|---|---|---|---|---|---|---|---|---|---|---|---|----------|----------|---|----------|---|---|---|---|---|---|---|---|---|---|---|---|---|---|---|---|-----------|----------------------|
| A | T | G | G | T | A | A | T | G | T | C | C | C | T | C | C | T | G | G | G | G        | A        | A | G        | T | T | C | T | G | T | C | C | C | A | C | C | C | T | G | T | Reference |                      |
| A | T | G | G | T | A | A | T | G | T | C | C | C | T | C | C | T | G | G | G | G        | <b>G</b> | A | <b>T</b> | G | T | T | C | T | G | T | C | C | C | A | C | C | C | T | G | T         | 91.43% (23742 reads) |
| A | T | G | G | T | A | A | T | G | T | C | C | C | T | C | C | T | - | G | G | G        | <b>G</b> | A | <b>T</b> | G | T | T | C | T | G | T | C | C | C | A | C | C | C | T | G | T         | 1.32% (344 reads)    |
| A | T | G | G | T | A | A | T | G | T | C | C | C | T | C | C | T | G | G | G | <b>G</b> | -        | A | <b>T</b> | G | T | T | C | T | G | T | C | C | C | A | C | C | C | T | G | T         | 1.30% (338 reads)    |

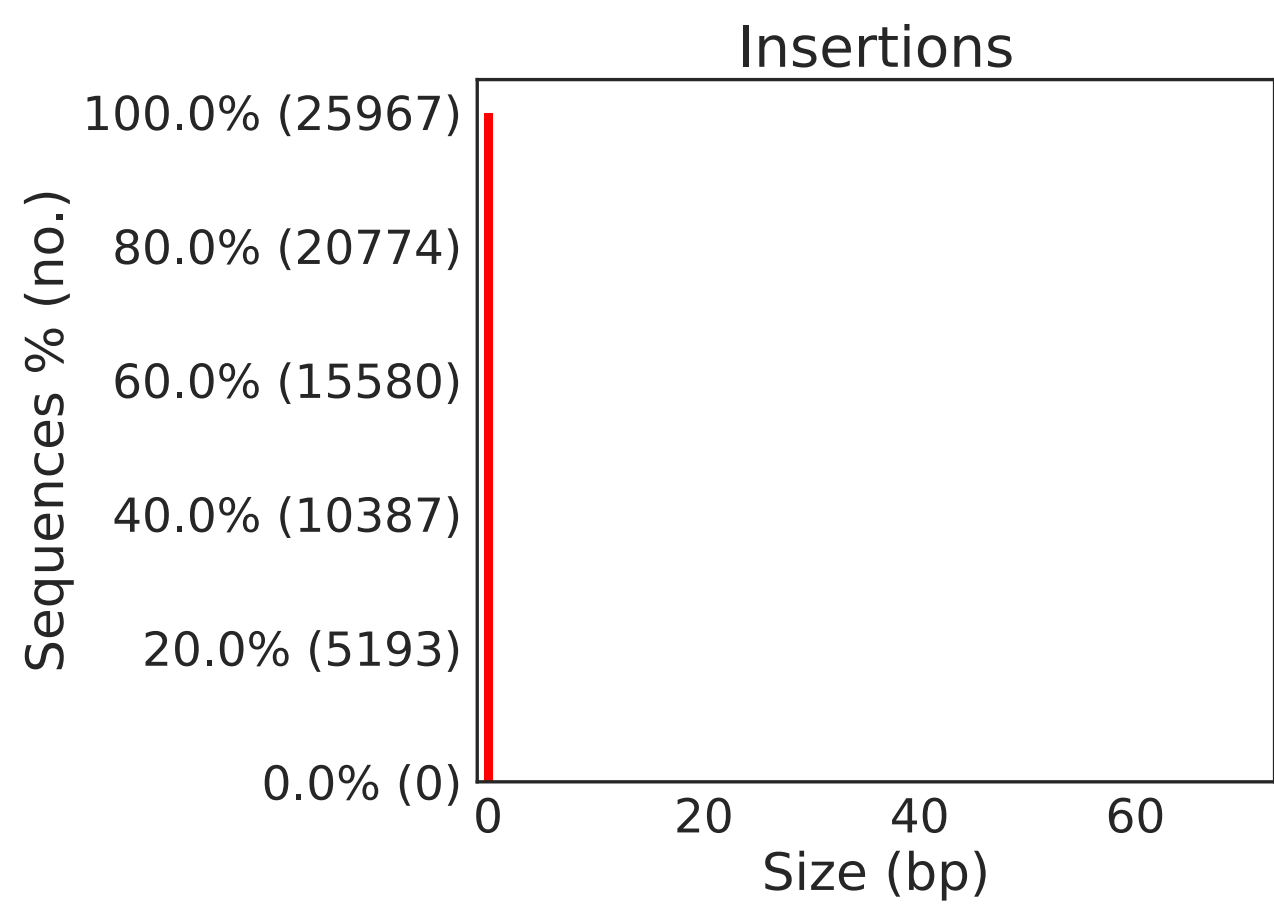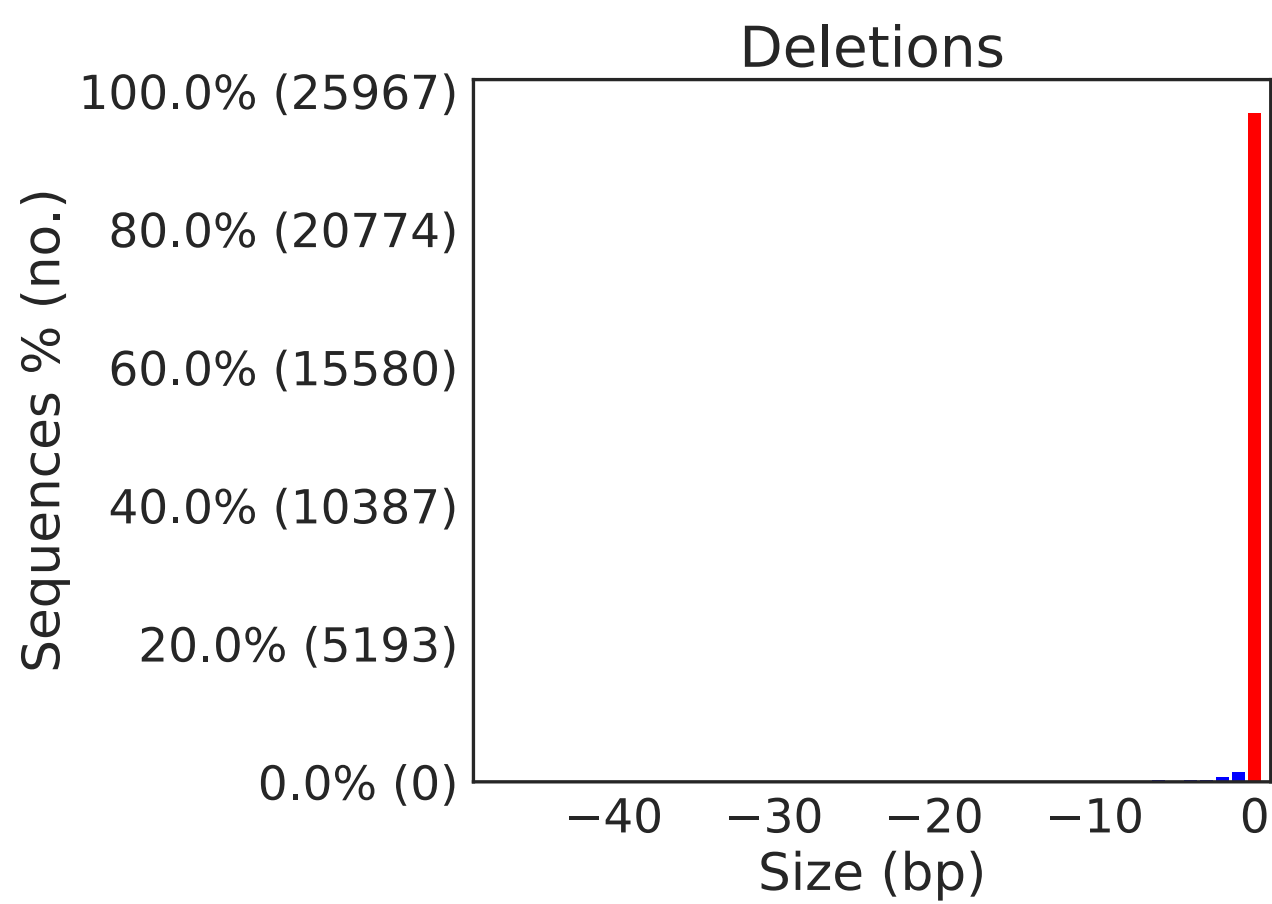

█ Insertion  
█ Non-insertion

█ Deletion  
█ Non-deletion

# *Tmc*<sup>WT/WT</sup>, SpCas9-HF1 + gRNA 1.1

**bold** Substitutions  
 Insertions  
 - Deletions  
 - - - Predicted cleavage position

|   |   |   |   |   |   |   |   |   |   |   |   |   |   |   |   |   |   |   |   |   |          |   |          |   |   |   |   |   |   |   |   |   |   |   |   |   |   |   |   |           |                      |
|---|---|---|---|---|---|---|---|---|---|---|---|---|---|---|---|---|---|---|---|---|----------|---|----------|---|---|---|---|---|---|---|---|---|---|---|---|---|---|---|---|-----------|----------------------|
| A | T | G | G | T | A | A | T | G | T | C | C | C | T | C | C | T | G | G | G | G | A        | A | G        | T | T | C | T | G | T | C | C | C | A | C | C | C | T | G | T | Reference |                      |
| A | T | G | G | T | A | A | T | G | T | C | C | C | T | C | C | T | G | G | G | G | <b>G</b> | A | <b>T</b> | G | T | T | C | T | G | T | C | C | C | A | C | C | C | T | G | T         | 92.89% (42631 reads) |
| A | T | G | G | T | A | A | T | G | T | C | C | C | T | C | C | T | - | G | G | G | G        | A | <b>T</b> | G | T | T | C | T | G | T | C | C | C | A | C | C | C | T | G | T         | 1.08% (497 reads)    |
| A | T | G | G | T | A | A | T | G | T | C | C | C | T | C | C | T | G | G | G | G | -        | A | <b>T</b> | G | T | T | C | T | G | T | C | C | C | A | C | C | C | T | G | T         | 0.98% (452 reads)    |

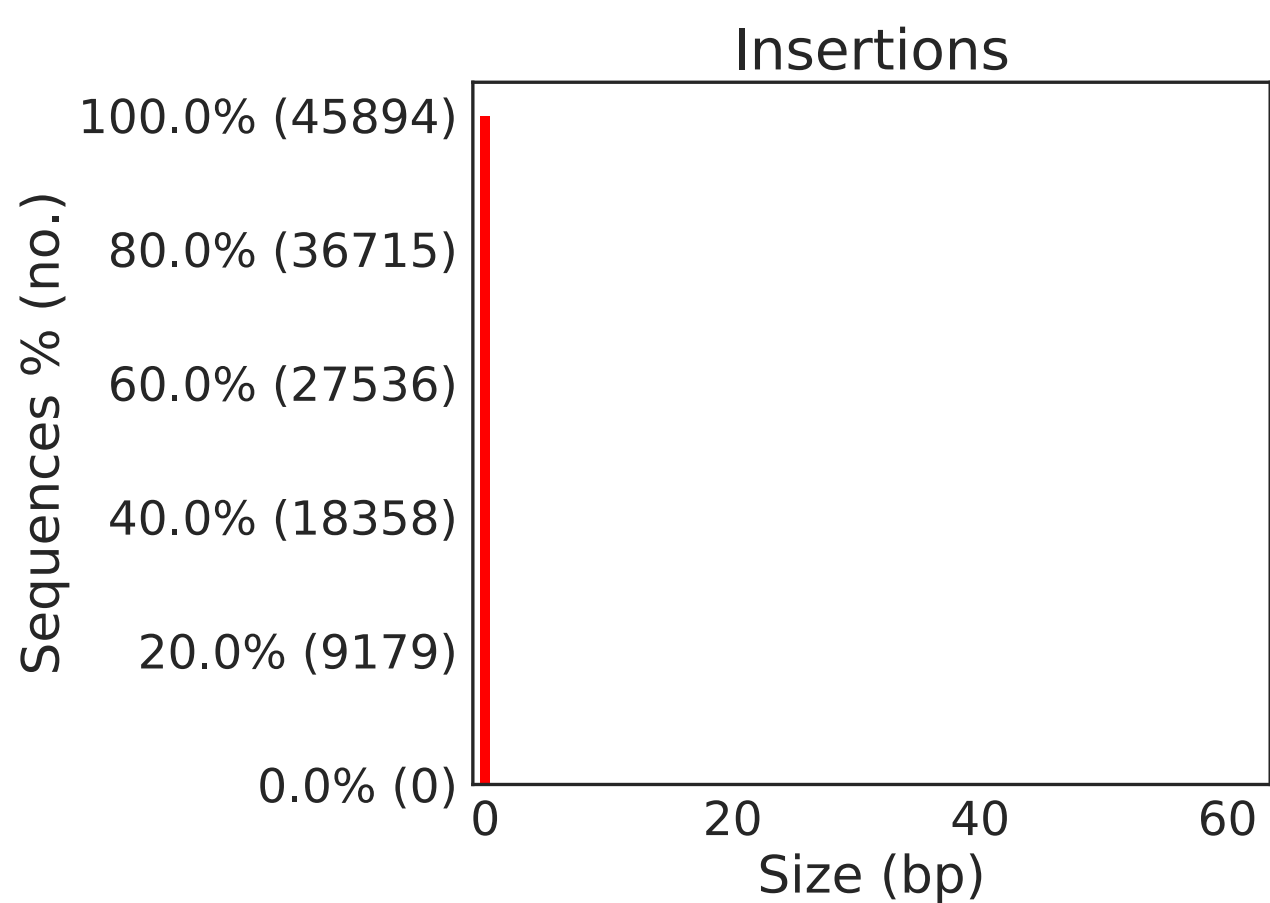

— Insertion  
— Non-insertion

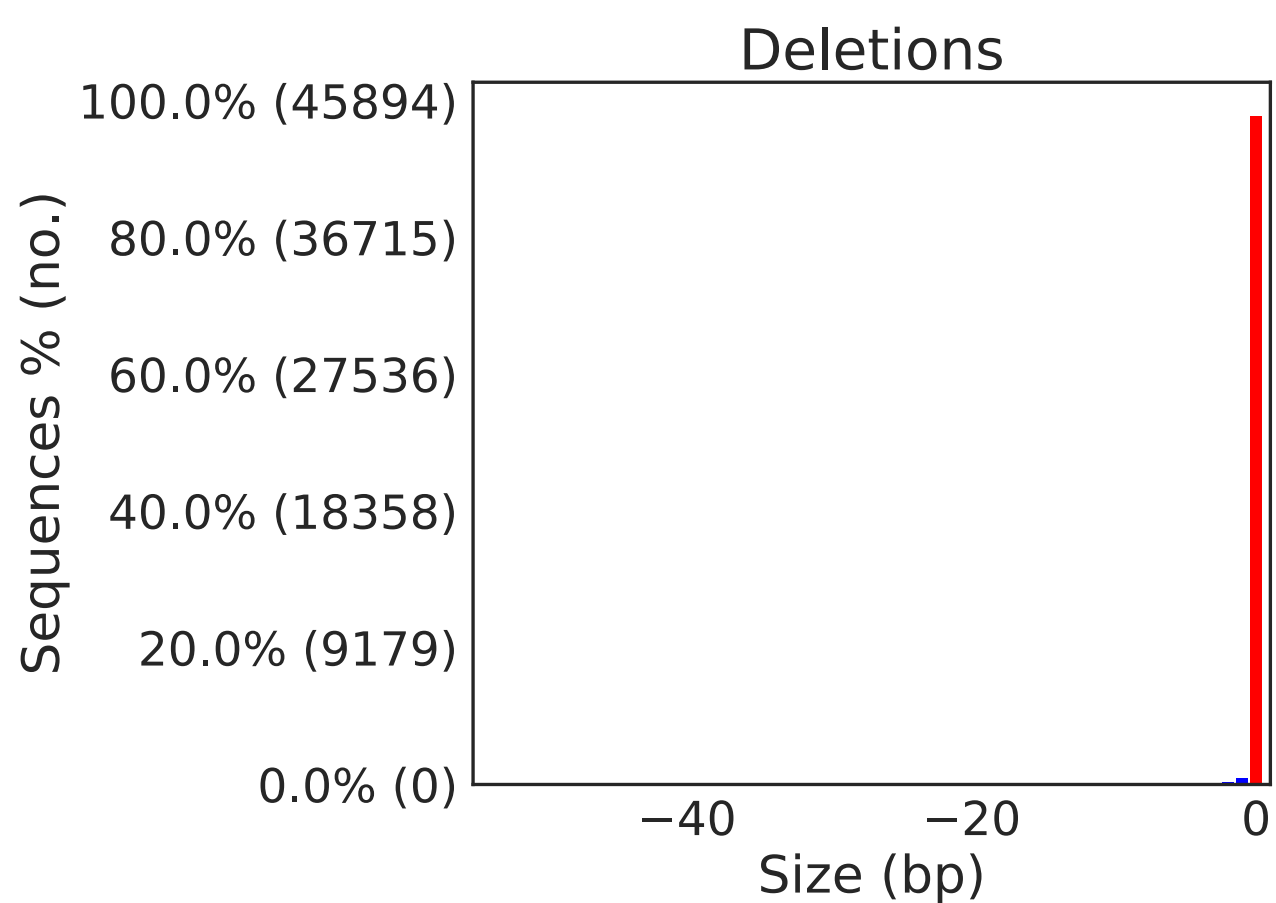

— Deletion  
— Non-deletion

# *Tmc*<sup>WT/WT</sup>, SaCas9<sup>KKH</sup> + gRNA 4.1

**bold** Substitutions  
 Insertions  
 - Deletions  
 - - - Predicted cleavage position

G A A C A T G G T A A T G T C C C T C C T G G G G A A G T T C T G T C C C A C C Reference  
 G A A C A T G G T A A T G T C C C T C C **T** G G G G A **T** G T T C T G T C C C A C C 96.30% (49854 reads)

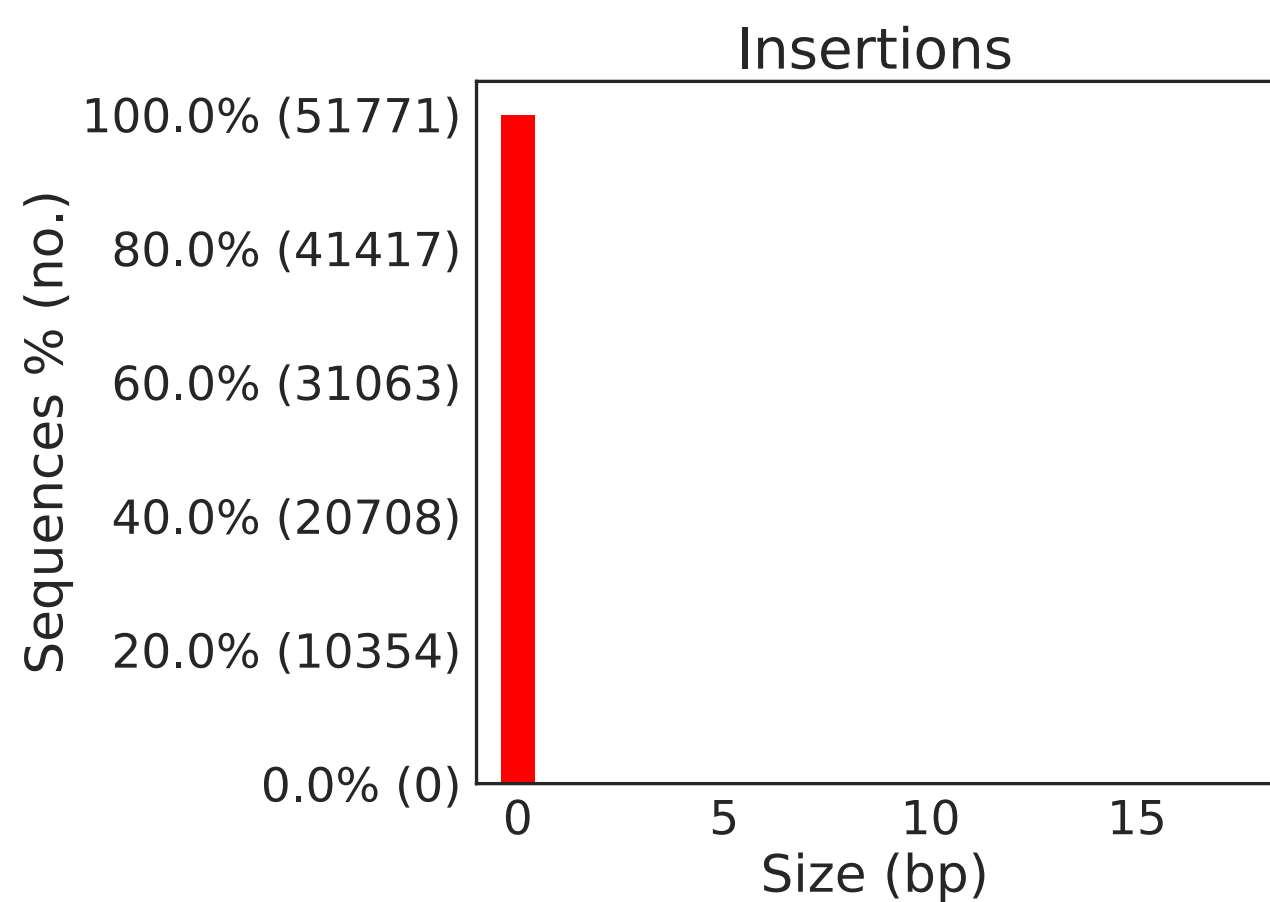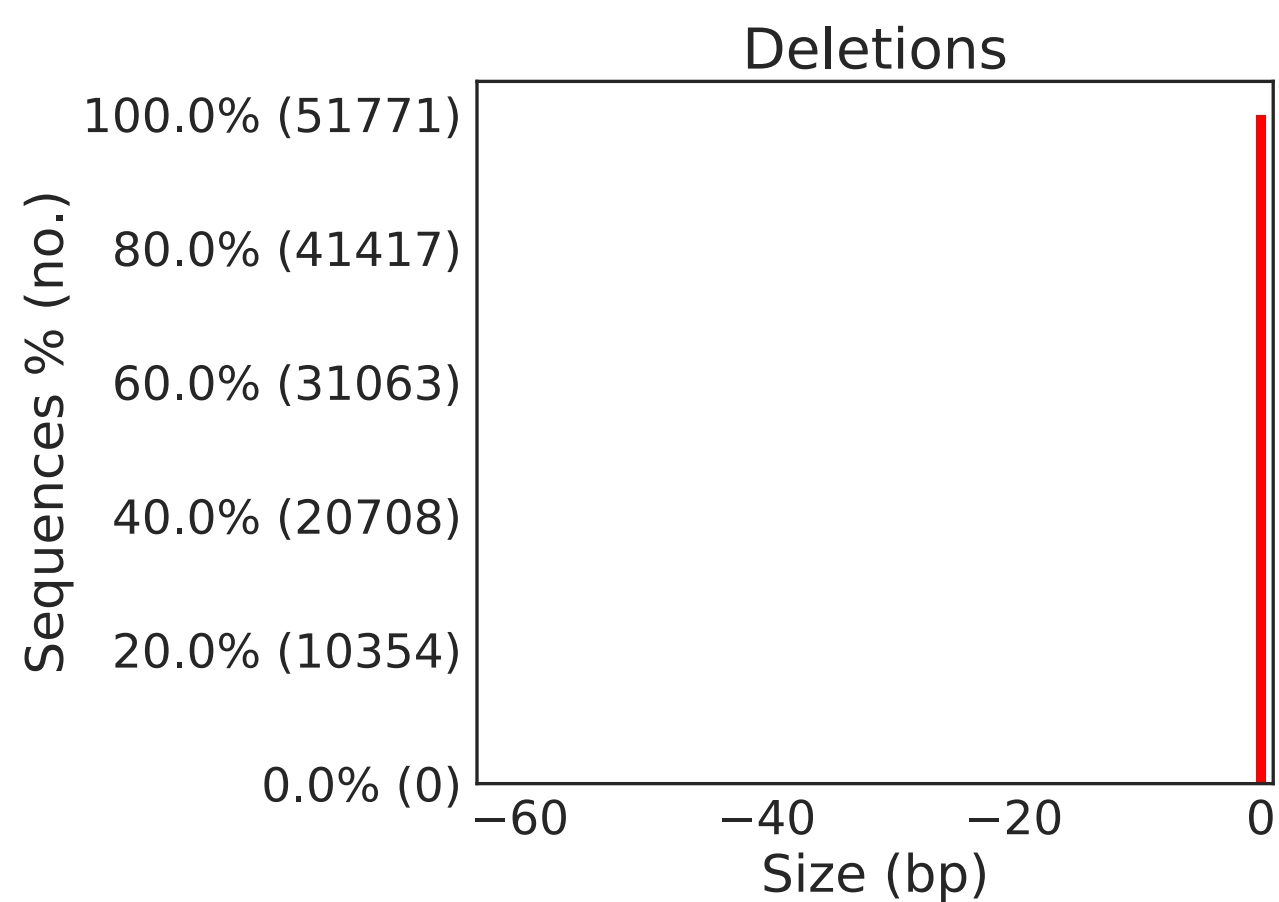

— Insertion  
 — Non-insertion

— Deletion  
 — Non-deletion



# *Tmc*<sup>WT/WT</sup>, SaCas9<sup>KKH</sup> + gRNA 4.2

**bold** Substitutions  
  Insertions  
 - Deletions  
 - - - Predicted cleavage position

G A A C A T G G T A A T G T C C C T C C T G G G G A A G T T C T G T C C C A C C Reference  
 G A A C A T G G T A A T G T C C C T C C **T** G G G G A **T** G T T C T G T C C C A C C 96.39% (58783 reads)

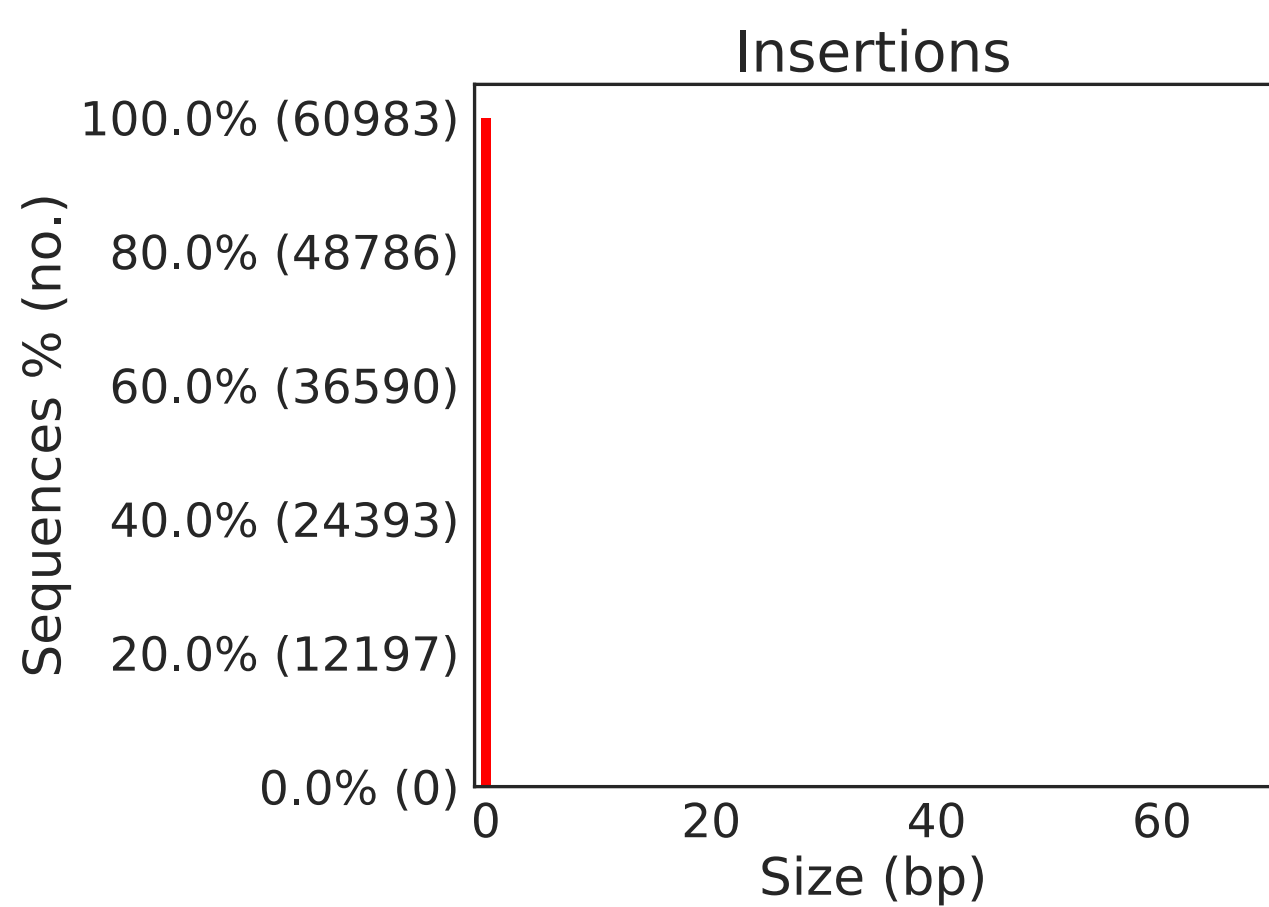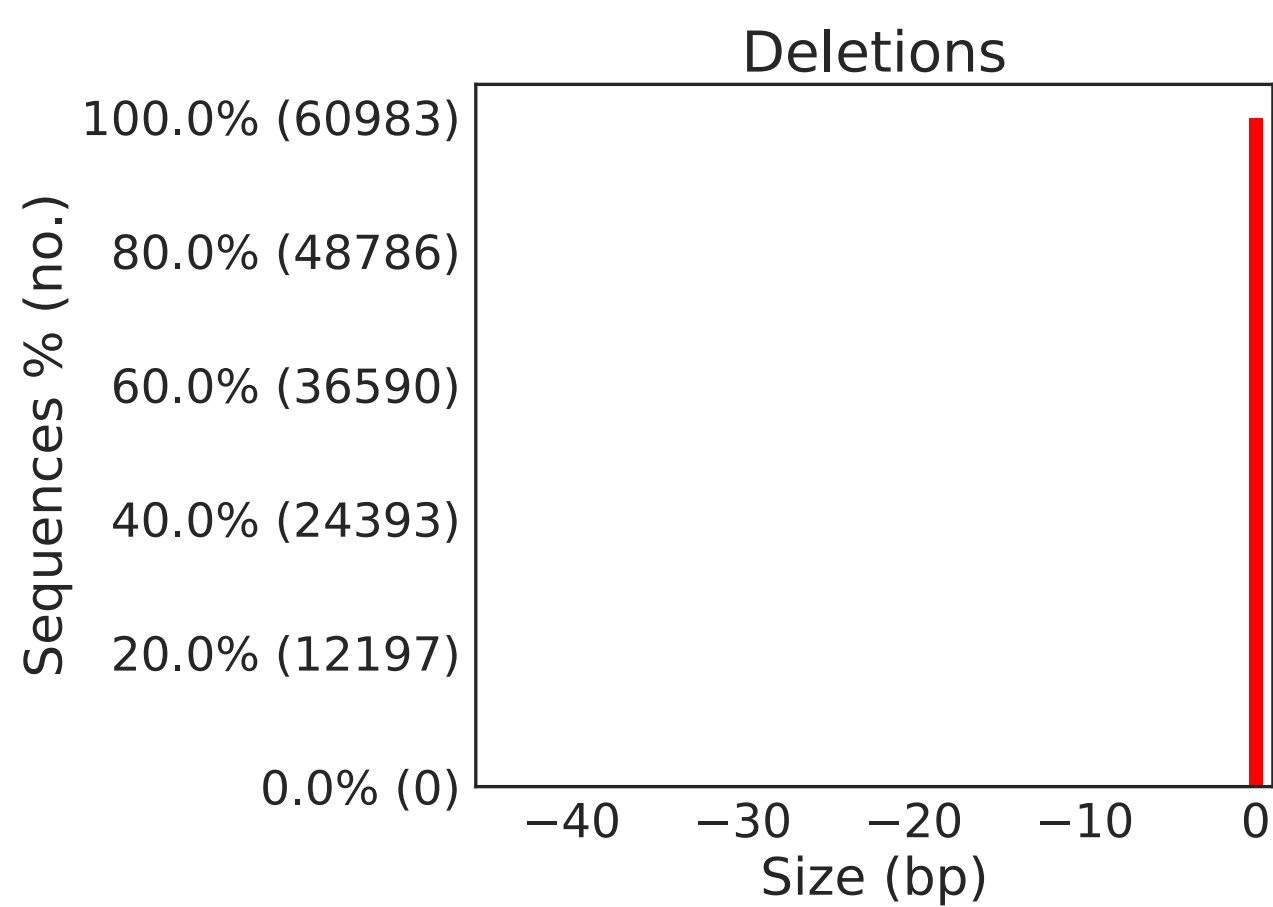

— Insertion  
— Non-insertion

— Deletion  
— Non-deletion

# *Tmc*<sup>WT/WT</sup>, SaCas9<sup>KKH</sup> + gRNA 4.3

- bold** Substitutions
- Insertions
- Deletions
- - - Predicted cleavage position

G A A C A T G G T A A T G T C C C T C C T G G G G A A G T T C T G T C C C A C C Reference

G A A C A T G G T A A T G T C C C T C C T G G G G A **T** G T T C T G T C C C A C C 96.03% (47401 reads)

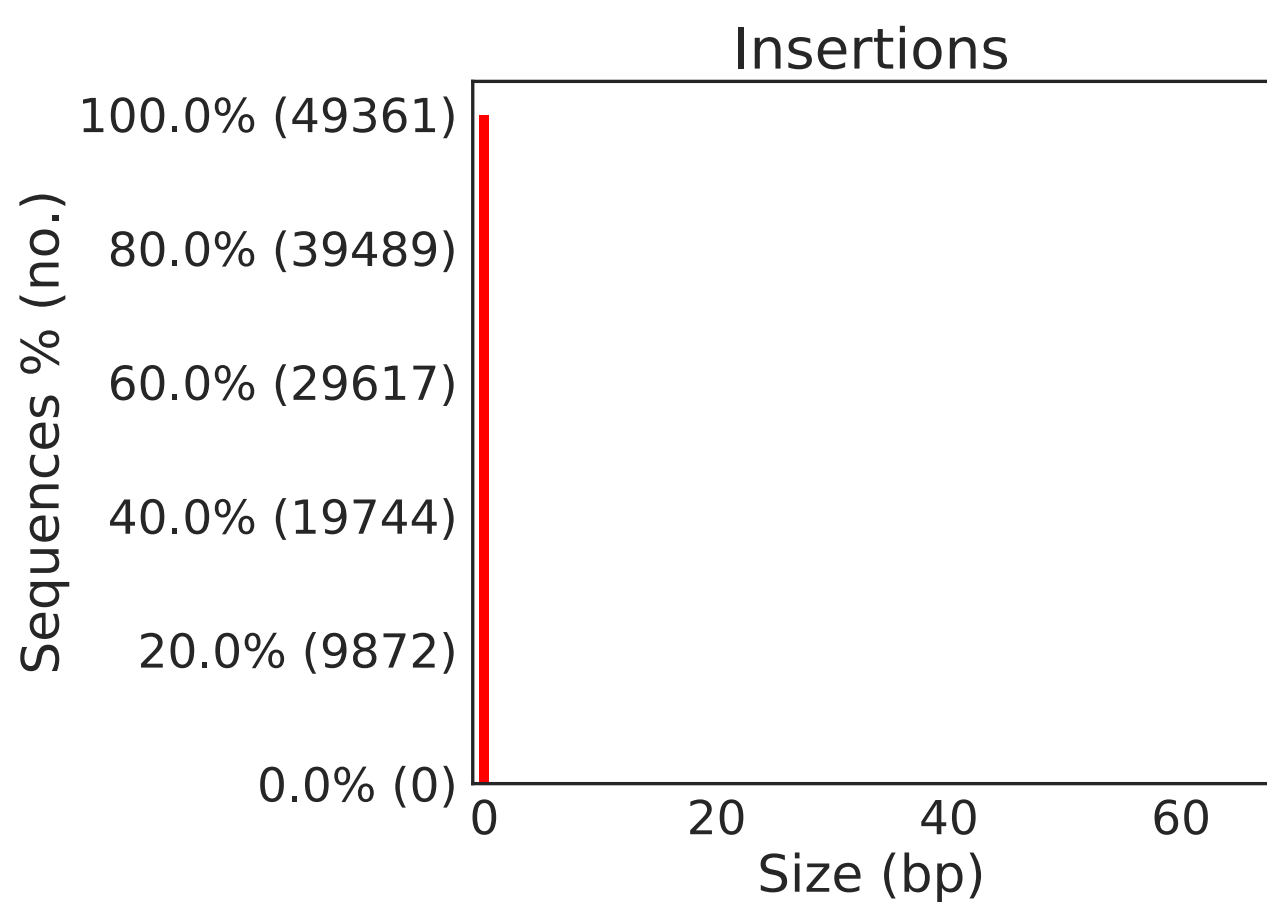

- Insertion
- Non-insertion

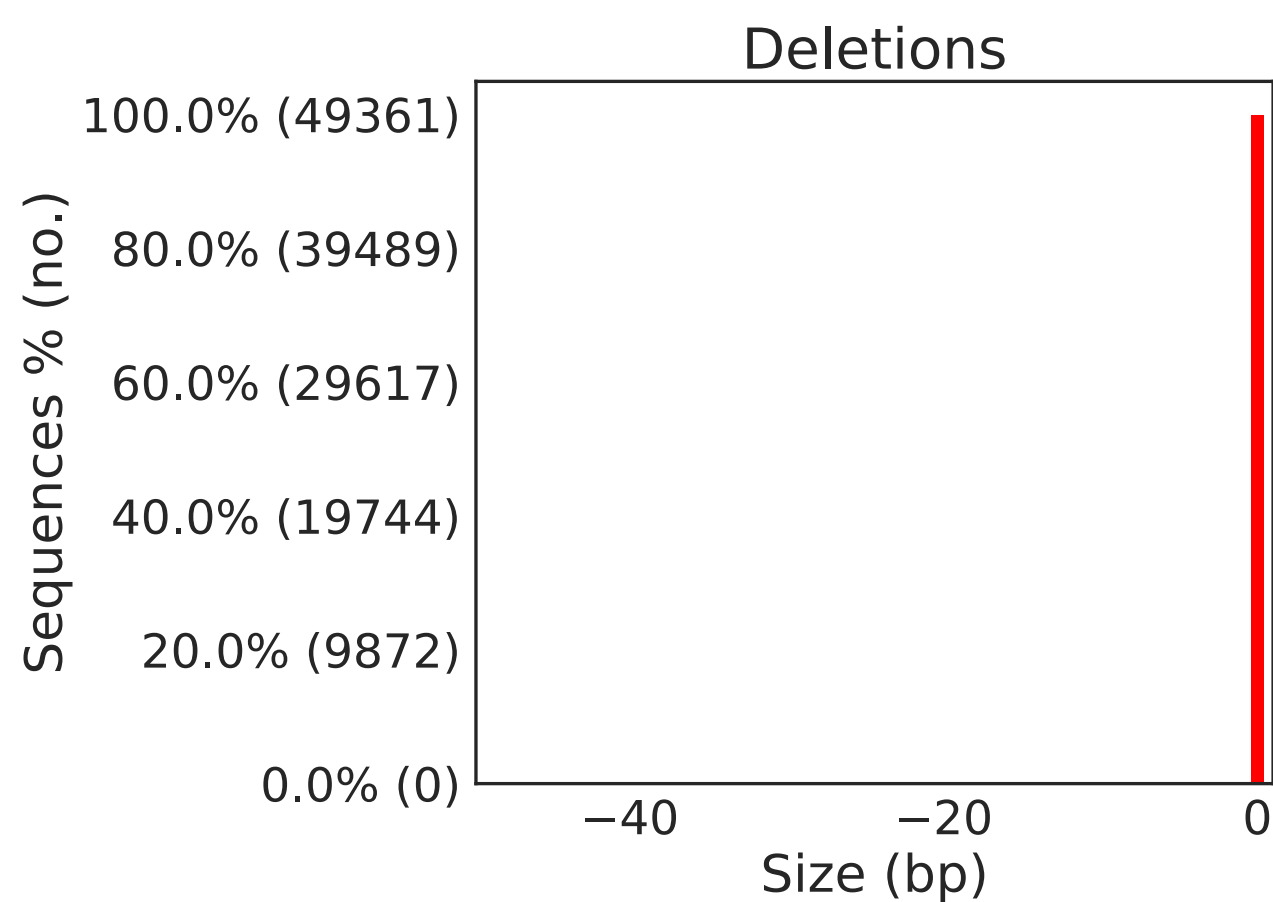

- Deletion
- Non-deletion

**Supplementary Data Set 4. Sequencing result from pBG201 (pAAV-CMV-NLS(SV40)-  
SaCas9(E782K/N968K/R1015H)-NLS(nucleoplasmin)-3xHA-bGHpA0-U6-BsaI-sgRNA)**

ACGAAAGGGCCTCGTGATACGCCTATTTTTATAGGTTAATGTCATGATAATAATGGTTTCTTAGACGTCA  
GGTGGCACTTTTCGGGGAAATGTGCGCGGAACCCCTATTTGTTTATTTTTCTAAATACATTCAAATATGT  
ATCCGCTCATGAGACAATAACCCCTGATAAATGCTTCAATAATATTGAAAAAGGAAGAGTATGAGTATTC  
ACATTTCCGTGTCGCCCTTATTCCCTTTTTTTCGCGCATTTTTCCTTCCCTGTTTTTGCTCACCCAGAAACG  
CTGGTAAAGTAAAAGATGCTGAAGATCAGTTGGGTGCACGAGTGGGTTACATCGAACTGGATCTCAACA  
GCGGTAAAGATCCTTGAGAGTTTTTCGCCCCGAAGAAGCTTTTCCAATGATGAGCACTTTTAAAGTTCTGCT  
ATGTGGCGCGGTATTATCCCGTATTGACGCCGGCAAGAGCAACTCGGTGCGCCGATACACTATTCTCAG  
AATGACTTGGTTGAGTACTCACCAGTACAGAAAAGCATCTTACGGATGGCATGACAGTAAGAGAATTAT  
GCAGTGTGCCATAACCATGAGTGATAAACTGCGGCCAACTTACTTCTGACAACGATCGGAGGACCGAA  
GGAGCTAACCCTTTTTTGCACAACATGGGGGATCATGTAACCTGCGCTTGATCGTTGGGAACCGGAGCTG  
AATGAAGCCATAACCAACGACGAGCGTGACACCACGATGCCTGTAGCAATGGCAACAACGTTGCGCAAAC  
TATTAAGTGGCGAACTACTTACTCTAGCTTCCCGCAACAATTAATAGACTGGATGGAGGCGGATAAAGT  
TGCAGGACCACTTCTGCGCTCGGCCCTTCCGGCTGGCTGGTTTATGCTGATAAATCTGGAGCCGGTGAG  
CGTGGAAGCCGCGGTATCATTGCAGCACTGGGGCCAGATGGTAAGCCCTCCCGTATCGTAGTTATCTACA  
CGACGGGGAGTCAGGCAACTATGGATGAACGAAATAGACAGATCGCTGAGATAGGTGCCCTACTGATTAA  
GCATTGGTAACTGTCAGACCAAGTTTACTCATATATACTTTAGATTGATTTAAAACCTTCATTTTTAATTT  
AAAAGGATCTAGGTGAAGATCCTTTTTGATAATCTCATGACCAAAATCCCTAACGTGAGTTTTCGTTCC  
ACTGAGCGTCAGACCCCGTAGAAAAGATCAAAGGATCTTCTTGAGATCCTTTTTTCTGCGCGTAATCTG  
CTGCTTGCAAACAAAAAACCACCGCTACCAGCGGTGGTTTGTGTTGCGCGATCAAGAGCTACCAACTCTT  
TTTCCGAAGGTAACCTGGCTTCAGCAGAGCGCAGATACCAATACTGTTCTTCTAGTGTAGCCGTAGTTAG  
GCCACCACTTCAAGAACTCTGTAGCACCGCCTACATACCTCGCTCTGCTAATCCTGTTACCAGTGGCTGC  
TGCCAGTGGCGATAAGTCGTGTCTTACCGGTTGGACTCAAGACGATAGTTACCGGATAAGGCGCAGCGG  
TCGGGCTGAACGGGGGTTTCGTGCACACAGCCAGCTTGAGCGAACGACCTACACCGAACTGAGATAAC  
TACAGCGTGAGCTATGAGAAAGCGCCACGCTTCCCGAAGGGAGAAAGGCGGACAGGTATCCGGTAAGCGG  
CAGGGTCCGAACAGGAGAGCGCACGAGGGAGCTTCCAGGGGAAACGCCTGGTATCTTTATAGTCCGTGTC  
GGGTTTCGCCACCTCTGACTTGAGCGTCGATTTTTGTGATGCTCGTCAGGGGGCGGAGCCTATGGAAAA  
ACGCCAGCAACCGGGCCTTTTTACGGTTCCCTGGCCTTTTGCTGGCCTTTTGCTCACATGTCTGCAGGCA  
GCTGCGCGCTCGCTCGCTCACTGAGGCCGCCGGCGCTCGGGCGACCTTTGGTCGCCCGGCCCTCAGTGAG  
CGAGCGAGCGCGCAGAGAGGGAGTGGCCAACCTCCTACTAGGGGTTCCCTGCGGCCCTTAGACTCGAGGC  
GTTGACATTGATTATTGACTAGTTATTAATAGTAATCAATTACGGGGTCATTAGTTTCATAGCCCATATAT  
GGAGTTCCGCGTTACATAACTTACGGTAAATGGCCCGCCTGGCTGACCGCCCAACGACCCCGCCCATTG  
ACGTCAATAATGACGTATGTTCCCATAGTAACGCCAATAGGGACTTTCATTGACGTCAATGGGTGGAGT  
ATTTACGGTAAACTGCCCACTTGGCAGTACATCAAGTGTATCATATGCCAAGTACGCCCCCTATTGACGT  
CAATGACGGTAAATGGCCCGCCTGGCATTATGCCAGTACATGACCTTATGGGACTTTCCTACTTGGCAG  
TACATCTACGTATTAGTCATCGCTATTACCATGGTGATGCGGTTTTGGCAGTACATCAATGGGCGTGGAT  
AGCGGTTTTGACTCACGGGGATTTCCAAGTCTCCACCCCATGACGTCAATGGGAGTTTTGTTTTGGCACCA  
AAATCAACGGGACTTTCAAAATGTCGTAACAACTCCGCCCATGACGCAAAATGGGCGGTAGGCGTGTA  
CGGTGGGAGGTCTATATAAGCAGAGCTCTCTGGCTAACTACCGGTGCCACCATGGCCCCAAAGAAGAAGC  
GGAAGTTCGGTATCCACGGAGTCCAGCAGCCAAGCGGAACTACATCCTGGGCCTGGACATCGGCATCAC  
CAGCGTGGGCTACGGCATCATCGACTACGAGACACGGGACGTGATCGATGCCGGCGTGCGGCTGTTCAA  
GAGGCCAACGTGGAAAACAACGAGGGCAGGCGGAGCAAGAGAGGCGCCAGAAGGCTGAAGCGGCGGAGGC  
GGCATAGAATCCAGAGAGTGAAGAAGCTGCTGTTGACTACAACCTGCTGACCGACCACAGCGAGCTGAG  
CGCATCAACCCCTACGAGGCCAGAGTGAAGGGCTGAGCCAGAAGCTGAGCGAGGAAGAGTTCTCTGCC  
GCCCTGCTGCACCTGGCCAAGAGAAGAGGCGTGCACAACGTGAACGAGGTGGAAGAGGACACCGGCAACG  
AGCTGTCCACCAAAGAGCAGATCAGCCGGAACAGCAAGGCCCTGGAAGAGAAATACGTGGCCGAACCTGCA  
GCTGGAACGGCTGAAGAAAGACGGCGAAGTGCGGGGCAGCATCAACAGATTCAAGACCAGCGACTACGTG  
AAAGAAGCCAAACAGCTGCTGAAGGTGCAGAAGGCCCTACCACCAGCTGGACCAGAGCTTCATCGACACCT  
ACATCGACCTGCTGGAAACCCGGCGGACCTACTATGAGGGACCTGGCGAGGGCAGCCCTTCCGGCTGGAA  
GGACATCAAAGAATGGTACGAGATGCTGATGGGCCACTGCACCTACTTCCCCGAGGAACTGCGGAGCGTG

AAGTACGCCTACAACGCCGACCTGTACAACGCCCTGAACGACCTGAACAATCTCGTGATCACCAGGGACG  
AGAACGAGAAGCTGGAATATTACGAGAAGTTCCAGATCATCGAGAACGTGTTCAAGCAGAAGAAGAAGCC  
CACCTGAAGCAGATCGCCAAAGAAATCCTCGTGAACGAAGAGGATATTAAGGGCTACAGAGTGACCAGC  
ACCGGCAAGCCGAGTTCACCAACCTGAAGGTGTACCACGACATCAAGGACATTACCGCCCGGAAAGAGA  
TTATTGAGAACGCCGAGCTGCTGGATCAGATTGCCAAGATCCTGACCATCTACCAGAGCAGCGAGGACAT  
CCAGGAAGAAGTACCATCTGAACTCCGAGCTGACCCAGGAAGAGATCGAGCAGATCTCTAATCTGAAG  
GGCTATACCGGCACCCACAACCTGAGCCTGAAGGCCATCAACCTGATCCTGGACGAGCTGTGGCACACCA  
ACGACAACCAGATCGCTATCTTCAACCGGCTGAAGCTGGTGCCCAAGAAGGTGGACCTGTCCCAGCAGAA  
AGAGATCCCCACCACCCTGGTGGACGACTTCATCCTGAGCCCCGTCGTGAAGAGAAGCTTCATCCAGAGC  
ATCAAAGTGATCAACGCCATCATCAAGAAGTACGGCCTGCCCAACGACATCATTATCGAGCTGGCCCGCG  
AGAAGAAGTCCAAGGACGCCAGAAAATGATCAACGAGATGCAGAAGCGGAACCGGCAGACCAACGAGCG  
GATCGAGGAAATCATCCGGACCACCGGCAAGAGAACGCCAAGTACCTGATCGAGAAGATCAAGCTGCAC  
GACATGCAGGAAGGCAAGTGCCTGTACAGCCTGGAAGCCATCCCTCTGGAAGATCTGCTGAACAACCCCT  
TCAACTATGAGGTGGACCACATCATCCCCAGAAAGCTGTCTTTCGACAACAGCTTCAACAACAAGGTGCT  
CGTGAAGCAGGAAGAAAACAGCAAGAAGGGCAACCGGACCCCATTCAGTACCTGAGCAGCAGCGACAGC  
AAGATCAGCTACGAAACCTTCAAGAAGCACATCCTGAATCTGGCCAAGGGCAAGGGCAGAATCAGCAAGA  
CCAAGAAAGAGTATCTGCTGGAAGAACGGGACATCAACAGGTTCTCCGTGCAGAAAGACTTCATCAACCG  
GAACCTGGTGGATACCAGATACGCCACCAGAGGCCCTGATGAACCTGCTGCGGAGCTACTTCAGAGTGAAC  
AACCTGGACGTGAAAGTGAAGTCCATCAATGGCGGCTTACCAGCTTCTGCGGCGGAAGTGAAGTTTA  
AGAAAGAGCGGAACAAGGGGTACAAGCACCACGCCGAGGACGCCCTGATCATTGCCAACGCCGATTTTCAT  
CTTCAAAGAGTGAAGAAGTGGACAAGGCCAAAAAAGTGATGAAAACAGATGTTTCGAGGAAAAGCAG  
GCCGAGAGCATGCCGAGATCGAAACCGAGCAGGAGTACAAAGAGATCTTCATCACCCCCACCAGATCA  
AGCACATTAAGGACTTCAAGGACTACAAGTACAGCCACCGGGTGGACAAGAAGCCTAATAGAAAAGCTGAT  
TAACGACACCCTGTACTCCACCCGGAAGGACGACAAGGGCAACACCCTGATCGTGAACAATCTGAACGGC  
CTGTACGACAAGGACAATGACAAGCTGAAAAAGCTGATCAACAAGAGCCCCGAAAAGCTGCTGATGTACC  
ACCACGACCCCCAGACCTACCAGAAAAGTGAAGCTGATTATGGAACAGTACGGCGACGAGAAGAATCCCT  
GTACAAGTACTACGAGGAAACCGGAACTACCTGACCAAGTACTCCAAAAAGGACAACGGCCCCGTGATC  
AAGAAGATTAAGTATTACGGCAACAAACTGAACGCCATCTGGACATCACCGGACACTACCCCAACAGCA  
GAAACAAGGTGCTGAAGCTGTCCCTGAAGCCCTACAGATTCGACGTGTACCTGGACAATGGCGTGTACAA  
GTTTCGTGACCGTGAAGAATCTGGATGTGATCAAAAAAGAAAAGTACTACGAAGTGAATAGCAAGTGTAT  
GAGGAAGCTAAGAAGCTGAAGAAGATCAGCAACCAGGCCGAGTTTATCGCCTCCTTCTACAAGAACGATC  
TGATCAAGATCAACGGCGAGCTGTATAGAGTGTATCGGCGTGAACAACGACCTGCTGAACCGGATCGAAGT  
GAACATGATCGACATCACCTACCGGAGTACCTGGAAAACATGAACGACAAGAGGGCCCCCCCCACATCATT  
AAGACAATCGCCTCCAAGACCCAGAGCATTAAAGAAGTACAGCACAGACATTCCTGGGCAACCTGTATGAAG  
TGAAATCTAAGAAGCACCCCTCAGATCATCAAAAAGGGCAAAAAGGGCCGGCGGCCACGAAAAGGCCGGCCA  
GGCAAAAAGAAAAGGGATCCTACCCATACGATGTTCCAGATTACGCTTACCCATACGATGTTCCAGAT  
TACGCTTACCCATACGATGTTCCAGATTACGCTTAAGAATTCCTAGAGCTCGCTGATCAGCCTCGACTGT  
GCCTTCTAGTTGCCAGCCATCTGTTGTTTGGCCCTCCCCCGTGCCTTCTTACCCTGGAAGGTGCCACT  
CCCCTGTCTTTCTAATAAAAATGAGGAAATTCATCGCATTGTCGTGAGTAGGTGTCATTCTATTTCTGG  
GGGGTGGGTGGGGCAGGACAGCAAGGGGGAGGATGGGAAGAGAATAGCAGGCATGCTGGGGAGGTACC  
GAGGGCCTATTTCCCATGATTCCTTCATATTTGCATATACGATACAAGGCTGTTAGAGAGATAATTGGAA  
TTAATTTGACTGTAAACACAAAGATATTAGTACAAAATACGTGACGTAGAAAAGTAATAATTTCTTGGGTA  
GTTTGCAGTTTTAAAATTATGTTTTAAAATGGACTATCATATGCTTACCCTAACCTGAAAGTATTTTCGAT  
TTCTTGGCTTTATATATCTTGTGGAAAGGACGAAAACCCGGAGACCACGGCAGGTCTCAGTTTTAGTACT  
CTGGAAACAGAATCTACTAAAACAAGGCAAAATGCCGTGTTTATCTCGTCAACTTGTGGCGAGATTTTT  
GCGGCCGAGGAACCCCTAGTGATGGAGTTGGCCACTCCCTCTCTGCGCGCTCGCTCGCTCACTGAGGCC  
GGGCGACCAAGGTCGCCGACGCCCGGGCTTTGCCCGGGCGGCTCAGTGAGCGAGCGAGCGCGCAGCT  
GCCTGCAGGGGCGCTGATGCGGTATTTTCTCCTTACGCATCTGTGCGGTATTTACACCCGCATACGTCA  
AAGCAACCATAGTACGCGCCCTGTAGCGGCGCATTAAGCGCGGCGGGTGTGGTGGTTACGCGCAGCGTGA  
CCGCTACACTTGCCAGCGCCTTAGCGCCCGCTCCTTTTCGCTTTCTTCCCTTCTTCTCGCCACGTTTCGC  
CGGCTTTCCCCGTCAAGCTCTAAAATCGGGGGCTCCCTTTAGGGTTCCGATTTAGTGCTTTACGGCACCTC  
GACCCCAAAAAGTGTATTTGGGTGATGGTTACGTAAGTGGGCCATCGCCCTGATAGACGGTTTTTTCGCC  
CTTTGACGTTGGAGTCCACGTTCTTTAATAGTGGACTCTTGTTCCAAAGTGAACAACACTCAACTCTAT

CTCGGGCTATTCTTTGATTTATAAGGGATTTTGCCGATTTCCGGTCTATTGGTTAAAAATGAGCTGATT  
TAACAAAAATTTAACGCGAATTTAACAAAATATTAACGTTTACAATTTTATGGTGCACTCTCAGTACAA  
TCTGCTCTGATGCCGCATAGTTAAGCCAGCCCCGACACCCGCCAACACCCGCTGACGCGCCCTGACGGGC  
TTGTCTGCTCCCGGCATCCGCTTACAGACAAGCTGTGACCGTCT
